# Supplementary material for: Kaposi's Sarcoma Herpesvirus microRNAs Target Caspase 3 and Regulate Apoptosis
Source: PLoS Pathog. 2011 Dec 8;7(12):e1002405. doi: 10.1371/journal.ppat.1002405 (PMC3234232; doi:10.1371/journal.ppat.1002405)
Supplement: Dataset S2 — Putative direct targets of the KSHV miRNAs in DG75 cells. Each row in the table corresponds to one gene, identified by a representative RefSeq mRNA ID, a set of Affymetrix probes designed to monitor the expression of that gene, the Entrez Gene ID, the gene name and the gene description provided by NCBI RefSeq. The “mRNA annotation” field provides information about the length and the span of the Coding Domain of the representative mRNA used for the analysis. “log2 fold change K10/12 vs EGFP” contains the log2 fold changes in gene expression upon transducing the K12/10 construct compared to the EGFP control, while “log2 intensity” is the average signal intensity on the microarrays. “diff. Expression p-value” is the (uncorrected) P-value of differential expression as computed by the limma algorithm. The “Detectable” field is true whenever the gene could be detected in at least one of the samples from the corresponding cell line. Finally, the two “Seed matches to K10/12 miRNAs” field indicates the KSHV miRNAs for which at least one match to the seed recognition motif could be found in the 3′ UTR of the representative RefSeq mRNA. The procedures we used to build this table are described in the “Methods” section. (XLS) [file ppat.1002405.s002.xls]

## Sheet: TableS2_DGtargets.txt
RefSeq	Affymetrix probe sets	mRNA annotation	Entrez gene ID	Gene name	Gene description	log2 fold change K10/12 vs EGFP	log2 intensity	diff. expression p-value	Detectable	Seed matches to K10/12 miRNAs
NM_020792	225847_at	TR(1..4289)CDS(137..1459)	57552	AADACL1	Homo sapiens arylacetamide deacetylase-like 1 (AADACL1), mRNA.	-0.689747196339058	4.98313395616126	0.000694060089037078	TRUE	kshv-miR-K12-8,kshv-miR-K12-2,kshv-miR-K12-3,kshv-miR-K12-4-3p
NM_020745	230024_at,231845_at	TR(1..4782)CDS(4..2961)	57505	AARS2	Homo sapiens alanyl-tRNA synthetase 2, mitochondrial (putative) (AARS2), nuclear gene encoding mitochondrial protein, mRNA.	-0.653428517729669	6.15662470752003	0.0289685508647867	TRUE	kshv-miR-K12-6-3p,kshv-miR-K12-1,kshv-miR-K12-9*,kshv-miR-K12-7
NM_005502	203504_s_at,203505_at	TR(1..10412)CDS(314..7099)	19	ABCA1	Homo sapiens ATP-binding cassette, sub-family A (ABC1), member 1 (ABCA1), mRNA.	-1.24023122598447	5.32480610331983	0.00260326462750085	TRUE	kshv-miR-K12-2,kshv-miR-K12-3,kshv-miR-K12-6-5p,kshv-miR-K12-4-3p,kshv-miR-K12-7
NM_018672	213353_at	TR(1..7044)CDS(1219..6147)	23461	ABCA5	Homo sapiens ATP-binding cassette, sub-family A (ABC1), member 5 (ABCA5), transcript variant 1, mRNA.	-0.62516702202901	3.08026740878975	0.0116483775037851	TRUE	kshv-miR-K12-3
NM_033450	213485_s_at	TR(1..5118)CDS(360..4754)	89845	ABCC10	Homo sapiens ATP-binding cassette, sub-family C (CFTR/MRP), member 10 (ABCC10), mRNA.	-1.23040083753719	4.8325345831117	6.80812981571208e-05	TRUE	kshv-miR-K12-5
NM_138340	213017_at	TR(1..2085)CDS(141..1370)	171586	ABHD3	Homo sapiens abhydrolase domain containing 3 (ABHD3), mRNA.	-0.648760505602225	11.4517004980940	0.0404798799301768	TRUE	kshv-miR-K12-4-3p
NM_001012750	209027_s_at,209028_s_at	TR(1..3587)CDS(168..1613)	10006	ABI1	Homo sapiens abl-interactor 1 (ABI1), transcript variant 2, mRNA.	-0.522616388739808	10.3174311803686	0.0305693976156065	TRUE	kshv-miR-K12-6-3p,kshv-miR-K12-1,kshv-miR-K12-3
NM_001003407	200965_s_at,210461_s_at	TR(1..7620)CDS(303..2459)	3983	ABLIM1	Homo sapiens actin binding LIM protein 1 (ABLIM1), transcript variant 2, mRNA.	-0.65082936434484	6.43199575431047	0.0214072772260588	TRUE	kshv-miR-K12-5,kshv-miR-K12-3,kshv-miR-K12-6-5p,kshv-miR-K12-4-5p,kshv-miR-K12-9
NM_014049	224160_s_at	TR(1..2608)CDS(203..2068)	28976	ACAD9	Homo sapiens acyl-Coenzyme A dehydrogenase family, member 9 (ACAD9), mRNA.	-1.23331485983659	5.65828741132687	0.0450921776421028	TRUE	kshv-miR-K12-6-3p,kshv-miR-K12-6-5p,kshv-miR-K12-4-3p
NM_014716	205213_at,205212_s_at	TR(1..2498)CDS(182..2404)	9744	ACAP1	Homo sapiens ArfGAP with coiled-coil, ankyrin repeat and PH domains 1 (ACAP1), mRNA.	-1.05160522960706	8.10925897662657	0.0411363248729335	TRUE	kshv-miR-K12-8
NM_002197	207071_s_at	TR(1..3561)CDS(156..2825)	48	ACO1	Homo sapiens aconitase 1, soluble (ACO1), mRNA.	-1.13787314803978	5.51417342207768	0.00224227740970296	TRUE	kshv-miR-K12-3
NM_004035	227962_at,209600_s_at,213501_at	TR(1..7514)CDS(291..2273)	51	ACOX1	Homo sapiens acyl-Coenzyme A oxidase 1, palmitoyl (ACOX1), transcript variant 1, mRNA.	-0.629004191901722	4.8920940496616	0.00192597033101348	TRUE	kshv-miR-K12-8,kshv-miR-K12-1,kshv-miR-K12-11,kshv-miR-K12-3,kshv-miR-K12-6-5p,kshv-miR-K12-9*,kshv-miR-K12-7
NM_152282	239475_at,226925_at	TR(1..3198)CDS(300..1742)	92370	ACPL2	Homo sapiens acid phosphatase-like 2 (ACPL2), transcript variant 1, mRNA.	-0.598949680180977	2.95803321385254	0.0101554339831838	TRUE	kshv-miR-K12-1,kshv-miR-K12-9*
NM_001995	207275_s_at,201963_at	TR(1..3822)CDS(179..2275)	2180	ACSL1	Homo sapiens acyl-CoA synthetase long-chain family member 1 (ACSL1), mRNA.	-1.24483384367093	6.3297829375821	0.00367679198944720	TRUE	kshv-miR-K12-6-5p,kshv-miR-K12-4-3p
NM_001102	208636_at	TR(1..3743)CDS(311..2989)	87	ACTN1	Homo sapiens actinin, alpha 1 (ACTN1), transcript variant 2, mRNA.	-0.921245613187361	6.01412112969967	0.0406829298608982	TRUE	kshv-miR-K12-9*
NM_003183	205746_s_at	TR(1..3572)CDS(184..2658)	6868	ADAM17	Homo sapiens ADAM metallopeptidase domain 17 (ADAM17), mRNA.	-0.854301071865562	5.92649826446661	0.0140312239420915	TRUE	kshv-miR-K12-1,kshv-miR-K12-9*
NM_033274	209765_at,221128_at	TR(1..6466)CDS(65..2821)	8728	ADAM19	Homo sapiens ADAM metallopeptidase domain 19 (meltrin beta) (ADAM19), transcript variant 2, mRNA.	-1.13294630230891	3.28388120782015	0.00362048302876615	TRUE	kshv-miR-K12-3,kshv-miR-K12-9*,kshv-miR-K12-7
NM_182503	236817_at,227213_at	TR(1..6270)CDS(47..622)	134637	ADAT2	Homo sapiens adenosine deaminase, tRNA-specific 2, TAD2 homolog (S. cerevisiae) (ADAT2), mRNA.	-1.29595958004251	6.08672208826931	0.00582053137006483	TRUE	kshv-miR-K12-6-3p,kshv-miR-K12-1,kshv-miR-K12-11,kshv-miR-K12-3,kshv-miR-K12-6-5p,kshv-miR-K12-4-3p,kshv-miR-K12-9*,kshv-miR-K12-4-5p
NM_000675	205013_s_at	TR(1..2590)CDS(460..1698)	135	ADORA2A	Homo sapiens adenosine A2a receptor (ADORA2A), mRNA.	-1.39760037746321	7.53422097098905	0.00510470390131766	TRUE	kshv-miR-K12-6-5p,kshv-miR-K12-9*,kshv-miR-K12-7
NM_001125	238505_at,228042_at,207863_at	TR(1..3461)CDS(299..1372)	141	ADPRH	Homo sapiens ADP-ribosylarginine hydrolase (ADPRH), mRNA.	-0.573955885086564	3.7101365844467	0.0358219594570361	TRUE	kshv-miR-K12-1,kshv-miR-K12-11
NM_001126	221761_at	TR(1..2775)CDS(295..1665)	159	ADSS	Homo sapiens adenylosuccinate synthase (ADSS), mRNA.	-1.03029178509390	8.5622641693279	0.0111544694688528	TRUE	kshv-miR-K12-2,kshv-miR-K12-1,kshv-miR-K12-6-5p,kshv-miR-K12-9*
NM_153207	225889_at,235184_at	TR(1..5660)CDS(27..1538)	121536	AEBP2	Homo sapiens AE binding protein 2 (AEBP2), transcript variant 1, mRNA.	-0.692487836369494	6.9290314652533	0.0158658347619612	TRUE	kshv-miR-K12-2,kshv-miR-K12-3,kshv-miR-K12-4-3p,kshv-miR-K12-9
NM_001130	217729_s_at	TR(1..1687)CDS(174..767)	166	AES	Homo sapiens amino-terminal enhancer of split (AES), transcript variant 2, mRNA.	-0.599148005579634	8.24944259912003	0.00388512871472312	TRUE	kshv-miR-K12-9*,kshv-miR-K12-4-5p
NM_018238	218568_at,222132_s_at	TR(1..2925)CDS(172..1440)	55750	AGK	Homo sapiens acylglycerol kinase (AGK), mRNA.	-1.53623990309169	4.14851577685872	0.00202196950298802	TRUE	kshv-miR-K12-3,kshv-miR-K12-4-3p,kshv-miR-K12-4-5p
NM_000646	203566_s_at	TR(1..7182)CDS(260..4810)	178	AGL	Homo sapiens amylo-1, 6-glucosidase, 4-alpha-glucanotransferase (AGL), transcript variant 6, mRNA.	-1.29415224493319	9.77943884005935	0.000135553023279369	TRUE	kshv-miR-K12-11,kshv-miR-K12-3,kshv-miR-K12-4-3p,kshv-miR-K12-9
NM_001134831	221569_at,220841_s_at,220842_at	TR(1..5649)CDS(385..3975)	54806	AHI1	Homo sapiens Abelson helper integration site 1 (AHI1), transcript variant 1, mRNA.	-0.806664435126804	5.21446273994608	0.00846893042764594	TRUE	kshv-miR-K12-1,kshv-miR-K12-3,kshv-miR-K12-6-5p,kshv-miR-K12-9*,kshv-miR-K12-9
NM_001627	201951_at,201952_at	TR(1..4760)CDS(541..2292)	214	ALCAM	Homo sapiens activated leukocyte cell adhesion molecule (ALCAM), mRNA.	-1.80189214588737	6.10818479145227	0.00161862090868613	TRUE	kshv-miR-K12-1
NM_033087	225621_at	TR(1..2834)CDS(71..1321)	85365	ALG2	Homo sapiens asparagine-linked glycosylation 2 homolog (S. cerevisiae, alpha-1,3-mannosyltransferase) (ALG2), mRNA.	-0.92020862143	8.77456165547482	0.000118105717488091	TRUE	kshv-miR-K12-3,kshv-miR-K12-4-3p
NM_031445	223297_at	TR(1..4698)CDS(252..1184)	83607	AMMECR1L	Homo sapiens AMME chromosomal region gene 1-like (AMMECR1L), mRNA.	-0.589358394402154	8.54022554634745	0.000293698971786412	TRUE	kshv-miR-K12-1,kshv-miR-K12-6-5p,kshv-miR-K12-4-3p,kshv-miR-K12-9*,kshv-miR-K12-9
NM_152363	1553138_a_at	TR(1..3217)CDS(277..2124)	126549	ANKLE1	Homo sapiens ankyrin repeat and LEM domain containing 1 (ANKLE1), mRNA.	-1.02120444317567	6.89106658188112	0.0117364130060814	TRUE	kshv-miR-K12-1,kshv-miR-K12-6-5p,kshv-miR-K12-9*,kshv-miR-K12-7,kshv-miR-K12-4-5p
NM_015114	212201_at,212200_at	TR(1..4491)CDS(68..2884)	23141	ANKLE2	Homo sapiens ankyrin repeat and LEM domain containing 2 (ANKLE2), mRNA.	-0.732507109952606	7.55101164637796	0.0476590032223106	TRUE	kshv-miR-K12-8,kshv-miR-K12-3,kshv-miR-K12-4-3p,kshv-miR-K12-7
NM_017664	218093_s_at	TR(1..2495)CDS(136..1398)	55608	ANKRD10	Homo sapiens ankyrin repeat domain 10 (ANKRD10), mRNA.	-1.75423000635431	6.62862838600143	0.000420696307533888	TRUE	kshv-miR-K12-2,kshv-miR-K12-11,kshv-miR-K12-9
NM_030816	1554471_a_at,238597_at,227375_at	TR(1..5682)CDS(327..1952)	81573	ANKRD13C	Homo sapiens ankyrin repeat domain 13C (ANKRD13C), mRNA.	-0.628940006497821	4.48155712700491	0.0156388253077132	TRUE	kshv-miR-K12-6-3p,kshv-miR-K12-6-5p,kshv-miR-K12-4-5p
NM_032290	223542_at,1558076_at	TR(1..3813)CDS(81..3257)	84250	ANKRD32	Homo sapiens ankyrin repeat domain 32 (ANKRD32), mRNA.	-0.48838273586288	5.82818774108838	0.0476544640969122	TRUE	kshv-miR-K12-2,kshv-miR-K12-4-3p
NM_016466	223532_at	TR(1..914)CDS(33..584)	51239	ANKRD39	Homo sapiens ankyrin repeat domain 39 (ANKRD39), mRNA.	-0.893383268986277	6.78978263258069	0.000984688218197605	TRUE	kshv-miR-K12-6-5p,kshv-miR-K12-4-3p
NM_153697	235778_s_at	TR(1..3686)CDS(78..2837)	91526	ANKRD44	Homo sapiens ankyrin repeat domain 44 (ANKRD44), mRNA.	-0.954193412263114	2.86285615805976	0.0160958181735875	FALSE	kshv-miR-K12-1,kshv-miR-K12-11,kshv-miR-K12-4-3p,kshv-miR-K12-9*
NM_181868	204859_s_at,211554_s_at	TR(1..7075)CDS(578..4195)	317	APAF1	Homo sapiens apoptotic peptidase activating factor 1 (APAF1), transcript variant 4, mRNA.	-0.757707236011659	4.90054905711516	0.000165807335098212	TRUE	kshv-miR-K12-1,kshv-miR-K12-11,kshv-miR-K12-3,kshv-miR-K12-6-5p,kshv-miR-K12-9*,kshv-miR-K12-4-5p,kshv-miR-K12-9
NM_001642	211404_s_at,208703_s_at	TR(1..3727)CDS(73..2364)	334	APLP2	Homo sapiens amyloid beta (A4) precursor-like protein 2 (APLP2), mRNA.	-0.877292825473679	8.24484587653805	0.000123561004516392	TRUE	kshv-miR-K12-6-5p
NM_001655	201176_s_at	TR(1..3916)CDS(153..1688)	372	ARCN1	Homo sapiens archain 1 (ARCN1), mRNA.	-0.926241593969907	10.6522936341672	2.38561032806679e-08	TRUE	kshv-miR-K12-1,kshv-miR-K12-6-5p,kshv-miR-K12-9*,kshv-miR-K12-7,kshv-miR-K12-9
NM_032900	212738_at,37577_at	TR(1..5478)CDS(30..1514)	84986	ARHGAP19	Homo sapiens Rho GTPase activating protein 19 (ARHGAP19), mRNA.	-0.698629796961789	9.14386352430384	0.0098651972093601	TRUE	kshv-miR-K12-2,kshv-miR-K12-1,kshv-miR-K12-6-5p,kshv-miR-K12-4-3p
NM_014882	38149_at,204882_at	TR(1..2957)CDS(381..2297)	9938	ARHGAP25	Homo sapiens Rho GTPase activating protein 25 (ARHGAP25), transcript variant 2, mRNA.	-1.2068944914794	7.13179691180857	0.000800350169191681	TRUE	kshv-miR-K12-6-5p
NM_031371	221230_s_at	TR(1..5809)CDS(499..4179)	51742	ARID4B	Homo sapiens AT rich interactive domain 4B (RBP1-like) (ARID4B), transcript variant 2, mRNA.	-0.500363176614874	9.40467143367025	0.00829881315280679	TRUE	kshv-miR-K12-2,kshv-miR-K12-1
NM_006321	201230_s_at,201229_s_at,201228_s_at,216008_s_at	TR(1..4081)CDS(313..1794)	10425	ARIH2	Homo sapiens ariadne homolog 2 (Drosophila) (ARIH2), mRNA.	-0.815393549884973	5.86767427229473	0.0111841775183302	TRUE	kshv-miR-K12-5,kshv-miR-K12-7
NM_178815	242727_at	TR(1..3589)CDS(255..794)	221079	ARL5B	Homo sapiens ADP-ribosylation factor-like 5B (ARL5B), mRNA.	-1.2484265749019	4.86180757948631	0.000335394002136036	TRUE	kshv-miR-K12-6-3p,kshv-miR-K12-1,kshv-miR-K12-11,kshv-miR-K12-3,kshv-miR-K12-6-5p,kshv-miR-K12-4-3p,kshv-miR-K12-4-5p
NM_138795	225347_at	TR(1..2345)CDS(167..727)	127829	ARL8A	Homo sapiens ADP-ribosylation factor-like 8A (ARL8A), mRNA.	-0.767596244630304	5.99044862327134	0.0194187443426851	FALSE	kshv-miR-K12-2,kshv-miR-K12-6-5p
NM_213654	203486_s_at,1555279_at,219094_at	TR(1..3232)CDS(422..1579)	25852	ARMC8	Homo sapiens armadillo repeat containing 8 (ARMC8), transcript variant 3, mRNA.	-0.938732888785205	6.26676356997579	0.00517556733236024	TRUE	kshv-miR-K12-6-3p,kshv-miR-K12-3
NM_006409	200950_at	TR(1..1619)CDS(148..1260)	10552	ARPC1A	Homo sapiens actin related protein 2/3 complex, subunit 1A, 41kDa (ARPC1A), mRNA.	-0.790220634196026	7.60882491893639	0.0211965657245804	TRUE	kshv-miR-K12-3
NM_016150	227915_at,233857_s_at	TR(1..2742)CDS(490..2253)	51676	ASB2	Homo sapiens ankyrin repeat and SOCS box-containing 2 (ASB2), mRNA.	-1.90554417104294	8.14725186945102	1.05897741137915e-06	TRUE	kshv-miR-K12-3
NM_001001976	234584_s_at	TR(1..2224)CDS(83..1639)	11101	ATE1	Homo sapiens arginyltransferase 1 (ATE1), transcript variant 1, mRNA.	-0.736090161529812	5.62774734467225	0.0157988209660364	TRUE	kshv-miR-K12-3
NM_012068	204999_s_at,204998_s_at	TR(1..2268)CDS(568..1416)	22809	ATF5	Homo sapiens activating transcription factor 5 (ATF5), mRNA.	-1.37197350847510	10.3007442085349	0.000630732886452109	TRUE	kshv-miR-K12-9*
NM_032885	226871_s_at	TR(1..1929)CDS(121..1545)	84971	ATG4D	Homo sapiens ATG4 autophagy related 4 homolog D (S. cerevisiae) (ATG4D), mRNA.	-0.716943211478883	5.40916129543684	0.0112062354409230	TRUE	kshv-miR-K12-6-5p,kshv-miR-K12-7
NM_001001586	220948_s_at	TR(1..2911)CDS(299..2344)	476	ATP1A1	Homo sapiens ATPase, Na+/K+ transporting, alpha 1 polypeptide (ATP1A1), transcript variant 2, mRNA.	-0.637085925727926	9.8175737377128	0.00332160032632307	TRUE	kshv-miR-K12-6-3p
NM_013236	208833_s_at,208832_at	TR(1..2963)CDS(258..1685)	25814	ATXN10	Homo sapiens ataxin 10 (ATXN10), mRNA.	-0.492538392185558	8.43757324527983	0.0157720303794833	TRUE	kshv-miR-K12-11,kshv-miR-K12-3
NM_000333	243259_at,204516_at,209964_s_at	TR(1..7242)CDS(554..3232)	6314	ATXN7	Homo sapiens ataxin 7 (ATXN7), transcript variant SCA7a, mRNA.	-0.903564113451598	6.1233540369658	0.0286351908609078	TRUE	kshv-miR-K12-2,kshv-miR-K12-1,kshv-miR-K12-3,kshv-miR-K12-6-5p,kshv-miR-K12-4-3p,kshv-miR-K12-4-5p
NM_001698	205052_at	TR(1..1601)CDS(36..1055)	549	AUH	Homo sapiens AU RNA binding protein/enoyl-Coenzyme A hydratase (AUH), nuclear gene encoding mitochondrial protein, mRNA.	-0.67950493495238	7.80200024861029	0.00873423189216033	TRUE	kshv-miR-K12-11,kshv-miR-K12-3
NM_004776	221485_at,221484_at	TR(1..4743)CDS(195..1361)	9334	B4GALT5	Homo sapiens UDP-Gal:betaGlcNAc beta 1,4- galactosyltransferase, polypeptide 5 (B4GALT5), mRNA.	-0.505914893571519	7.97359479045714	0.000109840072783491	TRUE	kshv-miR-K12-6-3p,kshv-miR-K12-3,kshv-miR-K12-6-5p,kshv-miR-K12-9*,kshv-miR-K12-7
NM_001015049	202985_s_at,230427_s_at,202984_s_at	TR(1..5006)CDS(271..1737)	9529	BAG5	Homo sapiens BCL2-associated athanogene 5 (BAG5), transcript variant 1, mRNA.	-1.01166318507063	6.31218922049169	0.00504663644773746	TRUE	kshv-miR-K12-1,kshv-miR-K12-11,kshv-miR-K12-6-5p,kshv-miR-K12-4-3p,kshv-miR-K12-9*
NM_014952	203051_at	TR(1..4544)CDS(72..2414)	22893	BAHD1	Homo sapiens bromo adjacent homology domain containing 1 (BAHD1), mRNA.	-0.48857179533094	5.95906600671896	0.00664439094598433	FALSE	kshv-miR-K12-5,kshv-miR-K12-6-5p,kshv-miR-K12-9*
NM_176824	219688_at,235007_at	TR(1..3718)CDS(175..2322)	55212	BBS7	Homo sapiens Bardet-Biedl syndrome 7 (BBS7), transcript variant 1, mRNA.	-0.801286039313823	6.52085714268183	0.0146784815707168	TRUE	kshv-miR-K12-11,kshv-miR-K12-9*
NM_001134738	203140_at,215990_s_at	TR(1..3086)CDS(50..2002)	604	BCL6	Homo sapiens B-cell CLL/lymphoma 6 (BCL6), transcript variant 3, mRNA.	-1.07535201279524	9.36828512099772	0.00133018342736991	TRUE	kshv-miR-K12-9*,kshv-miR-K12-9
NM_001024808	203795_s_at,203796_s_at	TR(1..3651)CDS(138..770)	605	BCL7A	Homo sapiens B-cell CLL/lymphoma 7A (BCL7A), transcript variant 2, mRNA.	-0.550239300077398	6.00792661575317	0.000825367285870847	TRUE	kshv-miR-K12-6-3p,kshv-miR-K12-5,kshv-miR-K12-6-5p,kshv-miR-K12-9*
NM_016561	218056_at	TR(1..2531)CDS(154..1506)	51283	BFAR	Homo sapiens bifunctional apoptosis regulator (BFAR), mRNA.	-0.830473447138145	8.82499237278914	0.00232467817361281	TRUE	kshv-miR-K12-1
NM_001165	210538_s_at	TR(1..5243)CDS(2783..4597)	330	BIRC3	Homo sapiens baculoviral IAP repeat-containing 3 (BIRC3), transcript variant 1, mRNA.	-0.628396629296157	11.3248685553538	0.0327348618662336	TRUE	kshv-miR-K12-11
NM_017593	59644_at,219546_at	TR(1..2681)CDS(167..2155)	55589	BMP2K	Homo sapiens BMP2 inducible kinase (BMP2K), transcript variant 2, mRNA.	-0.672371722341982	7.28386449995386	0.0145848363606922	TRUE	kshv-miR-K12-3
NM_001007246	231960_at,219280_at,214820_at,1553227_s_at,231860_at	TR(1..2488)CDS(140..502)	54014	BRWD1	Homo sapiens bromodomain and WD repeat domain containing 1 (BRWD1), transcript variant 3, mRNA.	-0.746721075046218	5.3605602752547	0.0157348605842838	TRUE	kshv-miR-K12-11,kshv-miR-K12-3,kshv-miR-K12-6-5p,kshv-miR-K12-4-3p,kshv-miR-K12-4-5p
NM_197974	204821_at	TR(1..2866)CDS(217..1845)	10384	BTN3A3	Homo sapiens butyrophilin, subfamily 3, member A3 (BTN3A3), transcript variant 2, mRNA.	-1.14328656510940	5.26498920746977	0.00187978184856839	TRUE	kshv-miR-K12-2,kshv-miR-K12-3,kshv-miR-K12-9*,kshv-miR-K12-7
NM_001211	203755_at	TR(1..3749)CDS(213..3365)	701	BUB1B	Homo sapiens budding uninhibited by benzimidazoles 1 homolog beta (yeast) (BUB1B), mRNA.	-0.495035476723716	11.1810175242585	0.045875430736716	TRUE	kshv-miR-K12-4-3p
NM_015652	219601_s_at	TR(1..4565)CDS(108..3851)	26148	C10orf12	Homo sapiens chromosome 10 open reading frame 12 (C10orf12), mRNA.	-0.837243059908489	3.25151476955391	0.036503937489526	FALSE	kshv-miR-K12-6-3p,kshv-miR-K12-11,kshv-miR-K12-4-3p
NM_015608	213410_at	TR(1..4596)CDS(294..3908)	26098	C10orf137	Homo sapiens chromosome 10 open reading frame 137 (C10orf137), mRNA.	-1.06292326375778	9.39319146432056	0.00830100821195603	TRUE	kshv-miR-K12-2
NM_173589	242540_at	TR(1..3222)CDS(663..2456)	283294	C11orf47	Homo sapiens chromosome 11 open reading frame 47 (C11orf47), mRNA.	-0.931442063292009	2.64622090856179	0.0499899720845897	TRUE	kshv-miR-K12-6-3p,kshv-miR-K12-4-3p
NM_018139	219166_at	TR(1..2976)CDS(82..2595)	55172	C14orf104	Homo sapiens chromosome 14 open reading frame 104 (C14orf104), transcript variant 1, mRNA.	-0.643920522483652	8.37455323809032	0.00334036266558175	TRUE	kshv-miR-K12-1
NM_022495	219972_s_at	TR(1..3952)CDS(523..3339)	64430	C14orf135	Homo sapiens chromosome 14 open reading frame 135 (C14orf135), mRNA.	-1.17854328852474	7.73700526248092	0.0230157464279254	TRUE	kshv-miR-K12-5,kshv-miR-K12-3
NM_024558	218940_at	TR(1..1784)CDS(28..717)	79609	C14orf138	Homo sapiens chromosome 14 open reading frame 138 (C14orf138), transcript variant 1, mRNA.	-0.576339468298923	9.24144002595557	0.0280433671373526	TRUE	kshv-miR-K12-9
NM_138288	212460_at,213508_at	TR(1..2538)CDS(56..271)	171546	C14orf147	Homo sapiens chromosome 14 open reading frame 147 (C14orf147), mRNA.	-0.486382859880023	8.94528204978756	0.00688769747444715	TRUE	kshv-miR-K12-6-3p,kshv-miR-K12-11,kshv-miR-K12-9*,kshv-miR-K12-7
NM_001043318	225980_at,235430_at	TR(1..7656)CDS(340..3477)	91748	C14orf43	Homo sapiens chromosome 14 open reading frame 43 (C14orf43), transcript variant 2, mRNA.	-0.532924250510534	4.87883112215553	0.0196948158701905	TRUE	kshv-miR-K12-8,kshv-miR-K12-5,kshv-miR-K12-6-5p,kshv-miR-K12-9*,kshv-miR-K12-7
NM_020447	224804_s_at,224798_s_at,224805_s_at	TR(1..3563)CDS(322..918)	57184	C15orf17	Homo sapiens chromosome 15 open reading frame 17 (C15orf17), mRNA.	-0.573739370489488	4.49290285157444	0.009932768764221	TRUE	kshv-miR-K12-6-3p,kshv-miR-K12-2,kshv-miR-K12-9*,kshv-miR-K12-7,kshv-miR-K12-4-5p
NM_024713	218791_s_at	TR(1..2750)CDS(161..1075)	79768	C15orf29	Homo sapiens chromosome 15 open reading frame 29 (C15orf29), mRNA.	-0.7026055735142	5.70351213962946	0.0097818696518992	TRUE	kshv-miR-K12-3,kshv-miR-K12-4-5p
NM_022344	203830_at	TR(1..1631)CDS(32..1222)	64149	C17orf75	Homo sapiens chromosome 17 open reading frame 75 (C17orf75), mRNA.	-0.658462870034093	7.95178830682121	0.0192433429511982	TRUE	kshv-miR-K12-4-5p
NM_001114118	222779_s_at,218896_s_at	TR(1..3764)CDS(24..1886)	55421	C17orf85	Homo sapiens chromosome 17 open reading frame 85 (C17orf85), transcript variant 1, mRNA.	-0.689072735530225	5.47681363216732	0.000514222375539443	TRUE	kshv-miR-K12-3,kshv-miR-K12-4-3p
NM_024805	219419_at	TR(1..1419)CDS(139..1170)	79863	C18orf22	Homo sapiens chromosome 18 open reading frame 22 (C18orf22), mRNA.	-0.568622604272117	8.12755514869338	0.0347396917555842	TRUE	kshv-miR-K12-6-3p
NM_173529	1553651_at,229442_at,244324_at,1553652_a_at	TR(1..5023)CDS(117..1235)	162681	C18orf54	Homo sapiens chromosome 18 open reading frame 54 (C18orf54), mRNA.	-0.501127622816753	5.21418971494904	0.0296767716323895	TRUE	kshv-miR-K12-5,kshv-miR-K12-2,kshv-miR-K12-11,kshv-miR-K12-3,kshv-miR-K12-4-3p,kshv-miR-K12-4-5p,kshv-miR-K12-9
NM_022756	218165_at,228517_at	TR(1..2166)CDS(18..623)	64769	C1orf149	Homo sapiens chromosome 1 open reading frame 149 (C1orf149), mRNA.	-0.51542853109963	7.30417786127194	6.08759873769442e-05	TRUE	kshv-miR-K12-5,kshv-miR-K12-1,kshv-miR-K12-6-5p
NM_207356	222000_at,238010_at	TR(1..1697)CDS(100..831)	339448	C1orf174	Homo sapiens chromosome 1 open reading frame 174 (C1orf174), mRNA.	-0.992675086104826	6.45890585657724	0.000415840044438987	TRUE	kshv-miR-K12-6-3p,kshv-miR-K12-6-5p,kshv-miR-K12-9*,kshv-miR-K12-4-5p
NM_014807	204757_s_at	TR(1..3370)CDS(360..2483)	9854	C2CD2L	Homo sapiens C2CD2-like (C2CD2L), mRNA.	-0.541494314720727	6.09459883530808	0.0357043680784764	FALSE	kshv-miR-K12-6-5p,kshv-miR-K12-9*
NM_025000	220172_at,231921_at	TR(1..5744)CDS(230..1792)	80067	C2orf37	Homo sapiens chromosome 2 open reading frame 37 (C2orf37), mRNA.	-0.953899287609708	5.3936370051612	0.0100221435310548	TRUE	kshv-miR-K12-5,kshv-miR-K12-2,kshv-miR-K12-1,kshv-miR-K12-11,kshv-miR-K12-3,kshv-miR-K12-4-3p,kshv-miR-K12-9*,kshv-miR-K12-4-5p
NM_020187	201678_s_at	TR(1..1638)CDS(89..1153)	56941	C3orf37	Homo sapiens chromosome 3 open reading frame 37 (C3orf37), transcript variant 2, mRNA.	-0.894672659448487	9.5002221980523	0.00832238002571174	TRUE	kshv-miR-K12-6-5p,kshv-miR-K12-9*
NM_199069	209177_at	TR(1..1387)CDS(505..1059)	25915	C3orf60	Homo sapiens chromosome 3 open reading frame 60 (C3orf60), transcript variant 1, mRNA.	-1.28667667586719	7.53884703347885	0.0188654822661987	TRUE	kshv-miR-K12-3,kshv-miR-K12-6-5p
NM_001128426	219023_at	TR(1..2812)CDS(354..1163)	55435	C4orf16	Homo sapiens chromosome 4 open reading frame 16 (C4orf16), transcript variant 2, mRNA.	-0.809770924416507	7.23358455399067	0.0473704449553618	TRUE	kshv-miR-K12-2,kshv-miR-K12-11
NM_018352	218513_at	TR(1..1923)CDS(282..893)	55319	C4orf43	Homo sapiens chromosome 4 open reading frame 43 (C4orf43), mRNA.	-0.808092725688102	8.12584105270252	0.00319345422060145	TRUE	kshv-miR-K12-3,kshv-miR-K12-9*,kshv-miR-K12-4-5p
NM_152409	1553106_at,224876_at,224875_at,1553107_s_at,1553108_at	TR(1..4896)CDS(62..628)	134553	C5orf24	Homo sapiens chromosome 5 open reading frame 24 (C5orf24), transcript variant 2, mRNA.	-0.557535061036555	6.0668668742285	0.0135121302279625	TRUE	kshv-miR-K12-6-3p,kshv-miR-K12-2,kshv-miR-K12-1,kshv-miR-K12-11,kshv-miR-K12-4-3p
NM_153706	238465_at	TR(1..1591)CDS(374..1273)	133383	C5orf35	Homo sapiens chromosome 5 open reading frame 35 (C5orf35), mRNA.	-0.592070212585283	6.5595206455108	0.0332973375796763	TRUE	kshv-miR-K12-1
NM_199184	204238_s_at,39817_s_at	TR(1..813)CDS(18..464)	10591	C6orf108	Homo sapiens chromosome 6 open reading frame 108 (C6orf108), transcript variant 2, mRNA.	-0.654686507757701	7.90415506737133	0.0426008145741388	TRUE	kshv-miR-K12-8
NM_001109938	227455_at	TR(1..1462)CDS(209..1156)	221545	C6orf136	Homo sapiens chromosome 6 open reading frame 136 (C6orf136), transcript variant 1, mRNA.	-0.760390654988148	7.33891677936756	0.0405643630098747	TRUE	kshv-miR-K12-6-5p
NM_001042493	236178_at,213314_at,213312_at	TR(1..2441)CDS(90..383)	57150	C6orf162	Homo sapiens chromosome 6 open reading frame 162 (C6orf162), transcript variant 1, mRNA.	-0.516404330187264	5.73160002728303	0.0484422401184611	TRUE	kshv-miR-K12-6-3p,kshv-miR-K12-2
NM_032307	235940_at	TR(1..2485)CDS(249..1274)	84267	C9orf64	Homo sapiens chromosome 9 open reading frame 64 (C9orf64), mRNA.	-0.902171788490464	8.4288821598584	0.0260515464982889	TRUE	kshv-miR-K12-1,kshv-miR-K12-9*
NM_001215	206873_at	TR(1..1339)CDS(25..951)	765	CA6	Homo sapiens carbonic anhydrase VI (CA6), mRNA.	-0.57021867313378	2.71334770507393	0.02054625765403	FALSE	kshv-miR-K12-11,kshv-miR-K12-4-5p
NM_004056	220234_at	TR(1..2278)CDS(249..1121)	767	CA8	Homo sapiens carbonic anhydrase VIII (CA8), mRNA.	-1.62264161033581	3.10844767786924	3.11474079806342e-05	TRUE	kshv-miR-K12-11,kshv-miR-K12-4-3p
NM_183393	204814_at,1568604_a_at,233950_at,234220_at,1568603_at	TR(1..5245)CDS(361..4185)	8618	CADPS	Homo sapiens Ca++-dependent secretion activator (CADPS), transcript variant 3, mRNA.	-0.632174249727898	4.44376172089746	0.0211753715871852	TRUE	kshv-miR-K12-2,kshv-miR-K12-1,kshv-miR-K12-9*
NM_033429	64408_s_at,1568600_at,221879_at	TR(1..4655)CDS(735..1325)	91860	CALML4	Homo sapiens calmodulin-like 4 (CALML4), transcript variant 1, mRNA.	-0.997059087205685	6.60084919803823	0.00827976205592008	TRUE	kshv-miR-K12-6-3p,kshv-miR-K12-9*,kshv-miR-K12-9
NM_001744	210349_at	TR(1..2168)CDS(101..1522)	814	CAMK4	Homo sapiens calcium/calmodulin-dependent protein kinase IV (CAMK4), mRNA.	-1.15583256226842	4.97647514544528	0.0349888105645403	TRUE	kshv-miR-K12-5
NM_001745	203538_at	TR(1..2203)CDS(106..996)	819	CAMLG	Homo sapiens calcium modulating ligand (CAMLG), mRNA.	-0.497710147251728	10.6575978924847	0.0141181820297227	TRUE	kshv-miR-K12-9*
NM_001024649	200068_s_at,208852_s_at,208853_s_at,238034_at	TR(1..4900)CDS(125..1903)	821	CANX	Homo sapiens calnexin (CANX), transcript variant 2, mRNA.	-1.19400875470728	8.49221956858847	3.06749735950255e-05	TRUE	kshv-miR-K12-6-3p,kshv-miR-K12-5,kshv-miR-K12-7
NM_024814	227187_at,220018_at	TR(1..4266)CDS(331..1806)	79872	CBLL1	Homo sapiens Cas-Br-M (murine) ecotropic retroviral transforming sequence-like 1 (CBLL1), transcript variant 1, mRNA.	-0.514770025289127	7.9175512126291	0.00753960095861293	TRUE	kshv-miR-K12-2,kshv-miR-K12-3,kshv-miR-K12-4-5p
NM_001039771	235221_at	TR(1..2360)CDS(472..1089)	643866	CBLN3	Homo sapiens cerebellin 3 precursor (CBLN3), mRNA.	-0.582032895586536	3.01271142656576	0.00439972663046836	FALSE	kshv-miR-K12-5
NM_173510	235330_at,225644_at	TR(1..3999)CDS(177..1016)	150275	CCDC117	Homo sapiens coiled-coil domain containing 117 (CCDC117), mRNA.	-0.50923490042475	5.27011795860705	0.00823356652603249	TRUE	kshv-miR-K12-5,kshv-miR-K12-2,kshv-miR-K12-4-3p,kshv-miR-K12-9*,kshv-miR-K12-9
NM_022757	225017_at	TR(1..4187)CDS(92..2830)	64770	CCDC14	Homo sapiens coiled-coil domain containing 14 (CCDC14), mRNA.	-1.16360217927185	9.9860170764822	0.0245364807873186	TRUE	kshv-miR-K12-5,kshv-miR-K12-3
NM_001042399	219644_at	TR(1..3182)CDS(534..2639)	51134	CCDC41	Homo sapiens coiled-coil domain containing 41 (CCDC41), transcript variant 2, mRNA.	-1.49801827758057	6.58559887694552	0.000549501436054886	TRUE	kshv-miR-K12-11,kshv-miR-K12-3
NM_017748	218655_s_at	TR(1..2347)CDS(154..1431)	54883	CCDC49	Homo sapiens coiled-coil domain containing 49 (CCDC49), mRNA.	-1.45829537402231	5.38632470495192	0.00105623319671099	TRUE	kshv-miR-K12-3,kshv-miR-K12-6-5p
NM_015621	1553102_a_at,212886_at	TR(1..3416)CDS(124..1014)	26112	CCDC69	Homo sapiens coiled-coil domain containing 69 (CCDC69), mRNA.	-1.93972221674482	8.14437951657401	0.000668502236883106	TRUE	kshv-miR-K12-1,kshv-miR-K12-11
NM_019083	219130_at	TR(1..3129)CDS(7..1452)	54482	CCDC76	Homo sapiens coiled-coil domain containing 76 (CCDC76), mRNA.	-0.809444734292372	7.62680962407645	0.00866021921572818	TRUE	kshv-miR-K12-4-3p
NM_001080414	231288_at,227228_s_at	TR(1..7523)CDS(100..6186)	440193	CCDC88C	Homo sapiens coiled-coil domain containing 88C (CCDC88C), mRNA.	-0.487297018478138	6.06692192440915	0.0155594941821506	TRUE	kshv-miR-K12-8,kshv-miR-K12-6-5p
NM_004748	214152_at,214151_s_at	TR(1..6666)CDS(134..2407)	9236	CCPG1	Homo sapiens cell cycle progression 1 (CCPG1), transcript variant 1, mRNA.	-0.775462918935015	5.81957584838857	0.00086003301959222	TRUE	kshv-miR-K12-2,kshv-miR-K12-11,kshv-miR-K12-6-5p,kshv-miR-K12-9*,kshv-miR-K12-4-5p
NM_005582	206206_at	TR(1..2725)CDS(149..2134)	4064	CD180	Homo sapiens CD180 molecule (CD180), mRNA.	-0.858749435481391	4.89591843221855	0.00480235411387255	FALSE	kshv-miR-K12-6-5p
NM_001771	204581_at,38521_at,217422_s_at	TR(1..3293)CDS(78..2621)	933	CD22	Homo sapiens CD22 molecule (CD22), mRNA.	-1.59310831148707	7.25605120722863	4.05649929997631e-08	TRUE	kshv-miR-K12-7
NM_001775	205692_s_at	TR(1..1494)CDS(108..1010)	952	CD38	Homo sapiens CD38 molecule (CD38), mRNA.	-1.50318864805059	8.15683547251285	0.00250795636728418	TRUE	kshv-miR-K12-11
NM_001778	204118_at	TR(1..1099)CDS(33..764)	962	CD48	Homo sapiens CD48 molecule (CD48), mRNA.	-1.42856657614846	10.3345404992261	0.000354913728241812	TRUE	kshv-miR-K12-6-5p
NM_021873	201853_s_at	TR(1..3701)CDS(779..2521)	994	CDC25B	Homo sapiens cell division cycle 25 homolog B (S. pombe) (CDC25B), transcript variant 1, mRNA.	-0.603442905233141	8.0644011784815	0.0127905058463998	TRUE	kshv-miR-K12-6-5p,kshv-miR-K12-9
NM_017913	219343_at	TR(1..1724)CDS(211..1224)	55664	CDC37L1	Homo sapiens cell division cycle 37 homolog (S. cerevisiae)-like 1 (CDC37L1), mRNA.	-0.79672203151407	5.64511486408808	7.71778975885863e-05	TRUE	kshv-miR-K12-2,kshv-miR-K12-6-5p,kshv-miR-K12-4-3p
NM_001791	210232_at,214230_at	TR(1..2182)CDS(167..742)	998	CDC42	Homo sapiens cell division cycle 42 (GTP binding protein, 25kDa) (CDC42), transcript variant 1, mRNA.	-1.4265348015613	4.42281053317112	0.00221152545771753	TRUE	kshv-miR-K12-9*
NM_001038707	222537_s_at,229120_s_at,223674_s_at	TR(1..3193)CDS(571..810)	56882	CDC42SE1	Homo sapiens CDC42 small effector 1 (CDC42SE1), transcript variant 1, mRNA.	-0.737089797731086	5.94593939166294	0.00139501725534795	TRUE	kshv-miR-K12-6-3p,kshv-miR-K12-4-3p,kshv-miR-K12-4-5p
NM_031942	224428_s_at	TR(1..2839)CDS(132..1484)	83879	CDCA7	Homo sapiens cell division cycle associated 7 (CDCA7), transcript variant 1, mRNA.	-0.66716395934291	12.0592181610337	0.0113294083948603	TRUE	kshv-miR-K12-11,kshv-miR-K12-4-5p
NM_004064	209112_at	TR(1..2413)CDS(473..1069)	1027	CDKN1B	Homo sapiens cyclin-dependent kinase inhibitor 1B (p27, Kip1) (CDKN1B), mRNA.	-0.729898637997652	10.9666124263017	0.00231032195330931	TRUE	kshv-miR-K12-1,kshv-miR-K12-11
NM_080656	235006_at	TR(1..1217)CDS(45..395)	91368	CDKN2AIPNL	Homo sapiens CDKN2A interacting protein N-terminal like (CDKN2AIPNL), mRNA.	-1.10233781483533	6.1206582595711	0.0291618149172474	TRUE	kshv-miR-K12-1,kshv-miR-K12-3,kshv-miR-K12-9*
NM_079421	210240_s_at	TR(1..1162)CDS(49..549)	1032	CDKN2D	Homo sapiens cyclin-dependent kinase inhibitor 2D (p19, inhibits CDK4) (CDKN2D), transcript variant 2, mRNA.	-1.09503411286083	5.95894246595693	0.0161292622827019	TRUE	kshv-miR-K12-6-5p
NM_014985	215170_s_at,239413_at,238535_at	TR(1..5097)CDS(35..4999)	22995	CEP152	Homo sapiens centrosomal protein 152kDa (CEP152), mRNA.	-1.17455091521490	7.2496863239053	0.0276982996903762	TRUE	kshv-miR-K12-2
NM_022766	218421_at	TR(1..4445)CDS(108..1721)	64781	CERK	Homo sapiens ceramide kinase (CERK), mRNA.	-0.647684154179544	3.06188854129622	0.000839680520588592	FALSE	kshv-miR-K12-1,kshv-miR-K12-6-5p,kshv-miR-K12-4-3p,kshv-miR-K12-9*,kshv-miR-K12-4-5p
NM_006324	203166_at	TR(1..1281)CDS(138..1037)	10428	CFDP1	Homo sapiens craniofacial development protein 1 (CFDP1), mRNA.	-0.585153459002741	9.37819361044209	0.00306725409762914	TRUE	kshv-miR-K12-3
NM_021914	224663_s_at,233496_s_at,224352_s_at	TR(1..3043)CDS(64..564)	1073	CFL2	Homo sapiens cofilin 2 (muscle) (CFL2), transcript variant 1, mRNA.	-0.822015179871919	5.87690510792077	0.0134404933251483	TRUE	kshv-miR-K12-11,kshv-miR-K12-3,kshv-miR-K12-4-3p,kshv-miR-K12-7,kshv-miR-K12-4-5p
NM_001271	225077_at,1554015_a_at,1554014_at	TR(1..9374)CDS(576..6062)	1106	CHD2	Homo sapiens chromodomain helicase DNA binding protein 2 (CHD2), transcript variant 1, mRNA.	-1.05859128342402	6.16382786735921	0.000158020491273855	TRUE	kshv-miR-K12-2,kshv-miR-K12-1,kshv-miR-K12-6-5p,kshv-miR-K12-9*
NM_001039936	211419_s_at,213385_at	TR(1..2843)CDS(242..1240)	1124	CHN2	Homo sapiens chimerin (chimaerin) 2 (CHN2), transcript variant 1, mRNA.	-1.35647975895625	3.10060399358234	0.00116227591933938	TRUE	kshv-miR-K12-2,kshv-miR-K12-1,kshv-miR-K12-4-5p
NM_015097	212309_at,212306_at,1555469_a_at,212308_at	TR(1..7289)CDS(355..4875)	23122	CLASP2	Homo sapiens cytoplasmic linker associated protein 2 (CLASP2), mRNA.	-0.569139810953495	6.636211960855	0.0472222030467232	TRUE	kshv-miR-K12-1,kshv-miR-K12-6-5p,kshv-miR-K12-4-5p
NM_001286	203950_s_at	TR(1..5644)CDS(114..2723)	1185	CLCN6	Homo sapiens chloride channel 6 (CLCN6), transcript variant ClC-6a, mRNA.	-1.36386478646555	5.97318546153816	0.0365945570000231	TRUE	kshv-miR-K12-6-3p,kshv-miR-K12-6-5p,kshv-miR-K12-9*,kshv-miR-K12-4-5p
NM_012129	223249_at	TR(1..3493)CDS(192..926)	9069	CLDN12	Homo sapiens claudin 12 (CLDN12), mRNA.	-0.66552833742533	3.03179356144666	0.00396158896162858	FALSE	kshv-miR-K12-1,kshv-miR-K12-3
NM_030782	223020_at,226935_s_at	TR(1..2164)CDS(47..1663)	81037	CLPTM1L	Homo sapiens CLPTM1-like (CLPTM1L), mRNA.	-0.561108969488604	10.3491343230430	1.13469628613572e-06	TRUE	kshv-miR-K12-9*,kshv-miR-K12-7
NM_001136140	217870_s_at	TR(1..2809)CDS(150..689)	51727	CMPK1	Homo sapiens cytidine monophosphate (UMP-CMP) kinase 1, cytosolic (CMPK1), transcript variant 2, mRNA.	-0.638192220775439	10.9236343403470	0.00190168064752151	TRUE	kshv-miR-K12-5
NM_181554	224733_at,1555705_a_at	TR(1..2035)CDS(216..764)	123920	CMTM3	Homo sapiens CKLF-like MARVEL transmembrane domain containing 3 (CMTM3), transcript variant 3, mRNA.	-0.644058472719666	6.63118730138735	0.000464543065937463	TRUE	kshv-miR-K12-9*,kshv-miR-K12-4-5p
NM_178868	235099_at	TR(1..1185)CDS(295..816)	152189	CMTM8	Homo sapiens CKLF-like MARVEL transmembrane domain containing 8 (CMTM8), mRNA.	-1.37730056256665	6.14377347536186	7.60458928093417e-05	TRUE	kshv-miR-K12-1,kshv-miR-K12-3
NM_005776	201653_at	TR(1..1423)CDS(104..538)	10175	CNIH	Homo sapiens cornichon homolog (Drosophila) (CNIH), mRNA.	-0.538068344439147	11.7669288506610	1.36952598700870e-05	TRUE	kshv-miR-K12-6-3p,kshv-miR-K12-11,kshv-miR-K12-4-3p
NM_017623	220739_s_at	TR(1..4916)CDS(25..2148)	26505	CNNM3	Homo sapiens cyclin M3 (CNNM3), transcript variant 1, mRNA.	-1.85201306631546	5.02328358520211	0.00155515795663698	TRUE	kshv-miR-K12-6-5p,kshv-miR-K12-9*
NM_016083	208243_s_at,213436_at	TR(1..5486)CDS(64..1482)	1268	CNR1	Homo sapiens cannabinoid receptor 1 (brain) (CNR1), transcript variant 1, mRNA.	-0.494186949416685	3.64788231794977	0.0154327431243379	TRUE	kshv-miR-K12-6-3p,kshv-miR-K12-2,kshv-miR-K12-1,kshv-miR-K12-3,kshv-miR-K12-4-3p,kshv-miR-K12-7,kshv-miR-K12-9
NM_016144	218439_s_at,222637_at	TR(1..1456)CDS(24..632)	51397	COMMD10	Homo sapiens COMM domain containing 10 (COMMD10), mRNA.	-0.588793972090255	7.79560933943545	0.00639822294845132	TRUE	kshv-miR-K12-1
NM_016094	223491_at	TR(1..1441)CDS(48..647)	51122	COMMD2	Homo sapiens COMM domain containing 2 (COMMD2), mRNA.	-0.624301685309812	8.1696957076036	0.000287864533931651	TRUE	kshv-miR-K12-9*
NM_016128	217749_at	TR(1..3114)CDS(101..2725)	22820	COPG	Homo sapiens coatomer protein complex, subunit gamma (COPG), mRNA.	-1.76406303169435	7.46838635723757	0.00100616227791863	TRUE	kshv-miR-K12-6-3p,kshv-miR-K12-1
NM_022730	219997_s_at	TR(1..1977)CDS(104..898)	64708	COPS7B	Homo sapiens COP9 constitutive photomorphogenic homolog subunit 7B (Arabidopsis) (COPS7B), mRNA.	-1.13515651182296	6.41057556507312	8.96125342598009e-06	TRUE	kshv-miR-K12-6-5p
NM_021149	224583_at,221059_s_at	TR(1..1850)CDS(150..578)	23406	COTL1	Homo sapiens coactosin-like 1 (Dictyostelium) (COTL1), mRNA.	-1.05229504418824	10.4081206217634	0.000921989076090996	TRUE	kshv-miR-K12-9*
NM_078470	221550_at,219547_at,235855_at,223281_s_at	TR(1..7689)CDS(618..1850)	1355	COX15	Homo sapiens COX15 homolog, cytochrome c oxidase assembly protein (yeast) (COX15), nuclear gene encoding mitochondrial protein, transcript variant 1, mRNA.	-0.587283103947025	7.03131336533522	0.00606749446935655	TRUE	kshv-miR-K12-2,kshv-miR-K12-3,kshv-miR-K12-4-3p,kshv-miR-K12-9,kshv-miR-K12-11,kshv-miR-K12-6-5p,kshv-miR-K12-7,kshv-miR-K12-9*
NM_000097	204172_at	TR(1..2714)CDS(94..1458)	1371	CPOX	Homo sapiens coproporphyrinogen oxidase (CPOX), mRNA.	-1.08923786841380	7.9155115119455	2.09863517986264e-05	TRUE	kshv-miR-K12-3
NM_020825	225172_at	TR(1..7413)CDS(353..3550)	57585	CRAMP1L	Homo sapiens Crm, cramped-like (Drosophila) (CRAMP1L), mRNA.	-0.65371213799329	7.94561264686099	0.0232200635042999	TRUE	kshv-miR-K12-1,kshv-miR-K12-6-5p,kshv-miR-K12-7
NM_194071	228759_at,212345_s_at	TR(1..7455)CDS(396..1958)	64764	CREB3L2	Homo sapiens cAMP responsive element binding protein 3-like 2 (CREB3L2), mRNA.	-1.16905104165130	4.9755144483183	0.00152338110536709	TRUE	kshv-miR-K12-6-3p,kshv-miR-K12-2,kshv-miR-K12-11,kshv-miR-K12-9*,kshv-miR-K12-7
NM_182899	205931_s_at,229228_at	TR(1..8188)CDS(146..1573)	9586	CREB5	Homo sapiens cAMP responsive element binding protein 5 (CREB5), transcript variant 3, mRNA.	-1.56174432561448	4.11421712364198	0.00220749877513470	TRUE	kshv-miR-K12-6-3p,kshv-miR-K12-5,kshv-miR-K12-2,kshv-miR-K12-11,kshv-miR-K12-3,kshv-miR-K12-6-5p,kshv-miR-K12-4-3p,kshv-miR-K12-9*,kshv-miR-K12-7,kshv-miR-K12-4-5p
NM_153605	214030_at	TR(1..4802)CDS(65..3133)	131544	CRYBG3	Homo sapiens beta-gamma crystallin domain containing 3 (CRYBG3), mRNA.	-0.56984344532346	3.39697856987321	0.0208263119195436	TRUE	kshv-miR-K12-5,kshv-miR-K12-4-5p
NM_015989	221139_s_at	TR(1..2709)CDS(285..1847)	51380	CSAD	Homo sapiens cysteine sulfinic acid decarboxylase (CSAD), mRNA.	-1.30257753454264	3.59235259310245	0.00768523507563135	TRUE	kshv-miR-K12-2,kshv-miR-K12-1
NM_001895	212072_s_at,206075_s_at	TR(1..2732)CDS(277..1452)	1457	CSNK2A1	Homo sapiens casein kinase 2, alpha 1 polypeptide (CSNK2A1), transcript variant 2, mRNA.	-0.592888964948442	8.85300946971338	0.0251459405435907	TRUE	kshv-miR-K12-1,kshv-miR-K12-6-5p,kshv-miR-K12-9
NM_004078	200621_at	TR(1..1817)CDS(55..636)	1465	CSRP1	Homo sapiens cysteine and glycine-rich protein 1 (CSRP1), mRNA.	-0.777063569701774	8.21578331355772	0.00186463403815465	TRUE	kshv-miR-K12-6-3p,kshv-miR-K12-7,kshv-miR-K12-9
NM_005213	204971_at	TR(1..838)CDS(130..426)	1475	CSTA	Homo sapiens cystatin A (stefin A) (CSTA), mRNA.	-1.78545805039743	8.89760423141095	0.0367073764792454	TRUE	kshv-miR-K12-6-3p,kshv-miR-K12-6-5p,kshv-miR-K12-9
NM_015235	212901_s_at,212905_at	TR(1..4127)CDS(47..1897)	23283	CSTF2T	Homo sapiens cleavage stimulation factor, 3' pre-RNA, subunit 2, 64kDa, tau variant (CSTF2T), mRNA.	-0.731173915570303	6.28601121366644	0.0113011315571165	TRUE	kshv-miR-K12-2,kshv-miR-K12-9
NM_001908	200839_s_at,213274_s_at,227961_at,200838_at	TR(1..3783)CDS(163..1182)	1508	CTSB	Homo sapiens cathepsin B (CTSB), transcript variant 1, mRNA.	-0.53792309483288	5.13655884798037	0.0231846596873903	TRUE	kshv-miR-K12-2,kshv-miR-K12-1,kshv-miR-K12-6-5p,kshv-miR-K12-9*,kshv-miR-K12-7
NM_032966	216734_s_at,206126_at	TR(1..2893)CDS(289..1272)	643	CXCR5	Homo sapiens chemokine (C-X-C motif) receptor 5 (CXCR5), transcript variant 2, mRNA.	-1.85225008928697	4.28575069860785	4.86688484739989e-07	TRUE	kshv-miR-K12-6-3p,kshv-miR-K12-5,kshv-miR-K12-2,kshv-miR-K12-6-5p,kshv-miR-K12-9*,kshv-miR-K12-7
NM_198279	232087_at	TR(1..3354)CDS(1..2049)	256643	CXorf23	Homo sapiens chromosome X open reading frame 23 (CXorf23), mRNA.	-0.973854672572504	3.27066321469943	0.00090121922923208	TRUE	kshv-miR-K12-2,kshv-miR-K12-11,kshv-miR-K12-3
NM_001134402	227981_at	TR(1..4816)CDS(105..623)	284613	CYB561D1	Homo sapiens cytochrome b-561 domain containing 1 (CYB561D1), transcript variant 3, mRNA.	-0.522200512869049	5.00013697871608	0.00831778569442818	TRUE	kshv-miR-K12-5,kshv-miR-K12-1,kshv-miR-K12-11,kshv-miR-K12-6-5p,kshv-miR-K12-9*,kshv-miR-K12-7
NM_001037333	215785_s_at,220999_s_at	TR(1..6498)CDS(139..3900)	26999	CYFIP2	Homo sapiens cytoplasmic FMR1 interacting protein 2 (CYFIP2), transcript variant 1, mRNA.	-0.624235133491329	9.71606147888309	0.0257568726811546	TRUE	kshv-miR-K12-11,kshv-miR-K12-3,kshv-miR-K12-9
NM_017457	1555842_at,209158_s_at	TR(1..4607)CDS(301..1503)	9266	CYTH2	Homo sapiens cytohesin 2 (CYTH2), transcript variant 1, mRNA.	-0.624252800467409	6.7616303652189	0.0363103680246446	TRUE	kshv-miR-K12-5,kshv-miR-K12-2,kshv-miR-K12-6-5p,kshv-miR-K12-9*
NM_145056	228228_at	TR(1..2834)CDS(75..1964)	147906	DACT3	Homo sapiens dapper, antagonist of beta-catenin, homolog 3 (Xenopus laevis) (DACT3), mRNA.	-1.34957888608696	5.65095846497968	0.000109968176741800	TRUE	kshv-miR-K12-2
NM_004394	201095_at	TR(1..2385)CDS(208..516)	1611	DAP	Homo sapiens death-associated protein (DAP), mRNA.	-1.23496619137831	7.98514121528367	0.000241585059178588	TRUE	kshv-miR-K12-5,kshv-miR-K12-9*
NM_004395	202806_at,217025_s_at	TR(1..2942)CDS(173..2122)	1627	DBN1	Homo sapiens drebrin 1 (DBN1), transcript variant 1, mRNA.	-0.539308172814756	7.59809578512709	0.0083605308534962	TRUE	kshv-miR-K12-4-3p,kshv-miR-K12-9*
NM_001014283	219116_s_at	TR(1..3046)CDS(40..819)	55208	DCUN1D2	Homo sapiens DCN1, defective in cullin neddylation 1, domain containing 2 (S. cerevisiae) (DCUN1D2), mRNA.	-0.774384034010989	7.12938391195578	0.0106115233127681	TRUE	kshv-miR-K12-1,kshv-miR-K12-11,kshv-miR-K12-3,kshv-miR-K12-6-5p,kshv-miR-K12-9*
NM_006386	213998_s_at,208719_s_at,208718_at	TR(1..4805)CDS(104..2293)	10521	DDX17	Homo sapiens DEAD (Asp-Glu-Ala-Asp) box polypeptide 17 (DDX17), transcript variant 1, mRNA.	-0.655409244358365	6.67319212019855	0.0176481051543165	TRUE	kshv-miR-K12-6-3p,kshv-miR-K12-5,kshv-miR-K12-11,kshv-miR-K12-6-5p,kshv-miR-K12-7
NM_014856	202860_at	TR(1..5688)CDS(402..4892)	9909	DENND4B	Homo sapiens DENN/MADD domain containing 4B (DENND4B), mRNA.	-0.909837854274204	8.18419150072907	0.00678038506177378	TRUE	kshv-miR-K12-9*
NM_015213	212561_at	TR(1..4965)CDS(256..4119)	23258	DENND5A	Homo sapiens DENN/MADD domain containing 5A (DENND5A), mRNA.	-0.69903798203239	7.76475131778298	0.00126001528219278	TRUE	kshv-miR-K12-2,kshv-miR-K12-1,kshv-miR-K12-11
NM_144973	243613_at,228551_at,238917_s_at	TR(1..9409)CDS(187..4011)	160518	DENND5B	Homo sapiens DENN/MADD domain containing 5B (DENND5B), mRNA.	-1.00489052936232	3.50498208613581	0.0217888698562276	TRUE	kshv-miR-K12-1,kshv-miR-K12-9*,kshv-miR-K12-4-5p,kshv-miR-K12-9
NM_001134671	222543_at,218172_s_at,219402_s_at	TR(1..3119)CDS(287..982)	79139	DERL1	Homo sapiens Der1-like domain family, member 1 (DERL1), transcript variant 2, mRNA.	-0.49103178260014	9.63879725203385	0.000160825524278982	TRUE	kshv-miR-K12-9*,kshv-miR-K12-9
NM_138452	213279_at	TR(1..1470)CDS(270..1211)	115817	DHRS1	Homo sapiens dehydrogenase/reductase (SDR family) member 1 (DHRS1), mRNA.	-0.654016365094792	6.98259719380897	0.00861660504327032	TRUE	kshv-miR-K12-8
XM_938519	231954_at	TR(1..3016)CDS(1..429)	54553	DKFZP434I0714	PREDICTED: Homo sapiens hypothetical protein DKFZP434I0714 (DKFZP434I0714), mRNA.	-0.726782917601478	6.57585041081788	0.0348647751558753	TRUE	kshv-miR-K12-3,kshv-miR-K12-4-3p,kshv-miR-K12-4-5p,kshv-miR-K12-9
NM_021120	212728_at,207732_s_at,212727_at,212729_at	TR(1..6000)CDS(329..2782)	1741	DLG3	Homo sapiens discs, large homolog 3 (neuroendocrine-dlg, Drosophila) (DLG3), transcript variant 1, mRNA.	-0.589383285287498	4.44107548382845	0.000170650466154234	TRUE	kshv-miR-K12-6-5p,kshv-miR-K12-9*
NM_001031723	219237_s_at	TR(1..2783)CDS(152..1291)	79982	DNAJB14	Homo sapiens DnaJ (Hsp40) homolog, subfamily B, member 14 (DNAJB14), transcript variant 1, mRNA.	-0.626831917128132	7.59260744302849	0.0196704075319687	TRUE	kshv-miR-K12-2,kshv-miR-K12-4-5p
NM_006736	202500_at	TR(1..3129)CDS(238..1212)	3300	DNAJB2	Homo sapiens DnaJ (Hsp40) homolog, subfamily B, member 2 (DNAJB2), transcript variant 2, mRNA.	-0.683775706858472	5.28442161719129	0.00591375022197946	TRUE	kshv-miR-K12-9*
NM_012328	202843_at,1554462_a_at,202842_s_at	TR(1..2371)CDS(203..874)	4189	DNAJB9	Homo sapiens DnaJ (Hsp40) homolog, subfamily B, member 9 (DNAJB9), mRNA.	-0.903449634349135	7.61644666607716	0.0423825183347234	TRUE	kshv-miR-K12-2,kshv-miR-K12-4-3p
NM_001012339	235032_at,238337_s_at,230893_at	TR(1..6083)CDS(228..1823)	134218	DNAJC21	Homo sapiens DnaJ (Hsp40) homolog, subfamily C, member 21 (DNAJC21), transcript variant 2, mRNA.	-0.51271993098565	7.37760486775188	0.000504542539478627	TRUE	kshv-miR-K12-1,kshv-miR-K12-3,kshv-miR-K12-4-3p,kshv-miR-K12-9*
NM_175629	244428_at,218457_s_at,222640_at	TR(1..4395)CDS(339..3077)	1788	DNMT3A	Homo sapiens DNA (cytosine-5-)-methyltransferase 3 alpha (DNMT3A), transcript variant 1, mRNA.	-0.485345443775442	3.40404323442559	0.0198298278238593	FALSE	kshv-miR-K12-2,kshv-miR-K12-7
NM_033407	1562940_at,225384_at	TR(1..7063)CDS(35..6364)	85440	DOCK7	Homo sapiens dedicator of cytokinesis 7 (DOCK7), mRNA.	-0.654229020842178	3.69191993587102	4.27489616528213e-07	TRUE	kshv-miR-K12-9
NM_203447	225502_at,232843_s_at,239027_at	TR(1..7257)CDS(102..6197)	81704	DOCK8	Homo sapiens dedicator of cytokinesis 8 (DOCK8), mRNA.	-0.580192539977535	5.93047070836115	0.0434428131858499	TRUE	kshv-miR-K12-6-5p,kshv-miR-K12-7
NM_001135917	221817_at	TR(1..2096)CDS(29..616)	57171	DOLPP1	Homo sapiens dolichyl pyrophosphate phosphatase 1 (DOLPP1), transcript variant 2, mRNA.	-1.08104216536787	6.77462530399902	0.0314947300529546	TRUE	kshv-miR-K12-8,kshv-miR-K12-6-5p,kshv-miR-K12-9*
NM_032482	231297_at,226201_at,214865_at	TR(1..7455)CDS(37..4650)	84444	DOT1L	Homo sapiens DOT1-like, histone H3 methyltransferase (S. cerevisiae) (DOT1L), mRNA.	-0.54217857612339	5.34651713199797	0.0223814272150733	TRUE	kshv-miR-K12-8,kshv-miR-K12-3*,kshv-miR-K12-6-5p,kshv-miR-K12-9*,kshv-miR-K12-7
NM_001938	209187_at,216652_s_at	TR(1..3222)CDS(726..1256)	1810	DR1	Homo sapiens down-regulator of transcription 1, TBP-binding (negative cofactor 2) (DR1), mRNA.	-0.704012420797843	9.5912949809972	0.0211800667443373	TRUE	kshv-miR-K12-2,kshv-miR-K12-4-3p,kshv-miR-K12-9
NM_183380	212254_s_at,216918_s_at,220154_at,204455_at,1553191_at	TR(1..18035)CDS(521..17014)	667	DST	Homo sapiens dystonin (DST), transcript variant 1, mRNA.	-0.579075609639341	3.31102553065318	0.00103962184993134	TRUE	kshv-miR-K12-5
NM_004416	227336_at	TR(1..3317)CDS(337..2199)	1840	DTX1	Homo sapiens deltex homolog 1 (Drosophila) (DTX1), mRNA.	-0.621164038155281	8.51772206705622	0.0287173440094527	TRUE	kshv-miR-K12-6-5p,kshv-miR-K12-9*
NM_007207	215501_s_at,221563_at	TR(1..2619)CDS(183..1631)	11221	DUSP10	Homo sapiens dual specificity phosphatase 10 (DUSP10), transcript variant 1, mRNA.	-0.643346368396875	5.63175573281142	0.0219379741181197	TRUE	kshv-miR-K12-7
NM_033083	226952_at	TR(1..4503)CDS(224..1030)	85403	EAF1	Homo sapiens ELL associated factor 1 (EAF1), mRNA.	-1.37089188790928	8.55287007623888	1.73625144217227e-05	TRUE	kshv-miR-K12-2,kshv-miR-K12-1,kshv-miR-K12-3,kshv-miR-K12-4-3p,kshv-miR-K12-4-5p
NM_004093	202668_at,202669_s_at	TR(1..4335)CDS(26..1027)	1948	EFNB2	Homo sapiens ephrin-B2 (EFNB2), mRNA.	-0.554002083083315	3.52798344656080	0.000451203347560316	TRUE	kshv-miR-K12-6-3p,kshv-miR-K12-5,kshv-miR-K12-2,kshv-miR-K12-1,kshv-miR-K12-6-5p,kshv-miR-K12-4-5p
NM_001964	201693_s_at,201694_s_at	TR(1..3136)CDS(271..1902)	1958	EGR1	Homo sapiens early growth response 1 (EGR1), mRNA.	-1.39047671348621	3.21770436186987	9.3255497042992e-06	TRUE	kshv-miR-K12-4-3p
NM_006795	209037_s_at,209038_s_at	TR(1..3482)CDS(256..1860)	10938	EHD1	Homo sapiens EH-domain containing 1 (EHD1), mRNA.	-0.526813693900036	6.81585199426852	0.0384182376871703	TRUE	kshv-miR-K12-2,kshv-miR-K12-1,kshv-miR-K12-11,kshv-miR-K12-9*,kshv-miR-K12-4-5p
NM_012154	225827_at	TR(1..3567)CDS(41..2620)	27161	EIF2C2	Homo sapiens eukaryotic translation initiation factor 2C, 2 (EIF2C2), mRNA.	-0.964154260970627	8.40793480660195	0.0331299117231874	TRUE	kshv-miR-K12-2,kshv-miR-K12-4-5p
NM_177422	219426_at	TR(1..3320)CDS(701..2581)	192669	EIF2C3	Homo sapiens eukaryotic translation initiation factor 2C, 3 (EIF2C3), transcript variant 2, mRNA.	-0.798162033132052	6.87372959521066	0.0159792259082502	TRUE	kshv-miR-K12-4-3p
NM_003753	200005_at	TR(1..1949)CDS(166..1812)	8664	EIF3D	Homo sapiens eukaryotic translation initiation factor 3, subunit D (EIF3D), mRNA.	-0.494977659827078	12.2785653099991	0.00215507788541577	TRUE	kshv-miR-K12-3,kshv-miR-K12-4-5p
NM_201999	203822_s_at	TR(1..3218)CDS(207..1952)	1998	ELF2	Homo sapiens E74-like factor 2 (ets domain transcription factor) (ELF2), transcript variant 1, mRNA.	-0.649485058345055	8.08413120872567	0.0126813262891057	TRUE	kshv-miR-K12-2,kshv-miR-K12-3,kshv-miR-K12-4-3p
NM_001039459	204513_s_at	TR(1..2129)CDS(150..893)	9844	ELMO1	Homo sapiens engulfment and cell motility 1 (ELMO1), transcript variant 3, mRNA.	-0.902201656216647	8.08392963443082	0.0104168241689038	TRUE	kshv-miR-K12-5
NM_032377	225156_at	TR(1..1029)CDS(65..316)	84337	ELOF1	Homo sapiens elongation factor 1 homolog (S. cerevisiae) (ELOF1), mRNA.	-0.75158311042701	7.07319883587931	0.0193389519973641	TRUE	kshv-miR-K12-9*
NM_012155	204398_s_at,204399_s_at	TR(1..2269)CDS(36..1985)	24139	EML2	Homo sapiens echinoderm microtubule associated protein like 2 (EML2), mRNA.	-0.561525175302187	4.58753902904711	0.0124405810210655	TRUE	kshv-miR-K12-9
NM_015036	212570_at,212573_at	TR(1..4650)CDS(76..1578)	23052	ENDOD1	Homo sapiens endonuclease domain containing 1 (ENDOD1), mRNA.	-1.50755544719463	3.90596716637579	1.38962671763895e-05	TRUE	kshv-miR-K12-6-3p,kshv-miR-K12-3
NM_001130140	227462_at,1554273_a_at,235104_at,219759_at	TR(1..5254)CDS(274..3156)	64167	ERAP2	Homo sapiens endoplasmic reticulum aminopeptidase 2 (ERAP2), transcript variant 2, mRNA.	-0.517778802237967	5.76435079959667	0.0423344039886027	TRUE	kshv-miR-K12-6-3p,kshv-miR-K12-2,kshv-miR-K12-1,kshv-miR-K12-4-3p,kshv-miR-K12-4-5p
NM_001040275	210780_at	TR(1..2470)CDS(469..1956)	2100	ESR2	Homo sapiens estrogen receptor 2 (ER beta) (ESR2), transcript variant b, mRNA.	-1.05840107073972	3.04645553059159	0.000387125615457746	TRUE	kshv-miR-K12-1,kshv-miR-K12-7
NM_019002	219216_at	TR(1..3298)CDS(140..2920)	54465	ETAA1	Homo sapiens Ewing tumor-associated antigen 1 (ETAA1), mRNA.	-0.489694739653973	6.79797841746226	0.00693783487816247	TRUE	kshv-miR-K12-6-5p,kshv-miR-K12-4-3p
NM_018638	226432_at,224453_s_at,225290_at,219017_at,224454_at,222262_s_at	TR(1..7101)CDS(23..1381)	55500	ETNK1	Homo sapiens ethanolamine kinase 1 (ETNK1), transcript variant 1, mRNA.	-0.93112528409387	6.93880612650922	0.00193654505457093	TRUE	kshv-miR-K12-2,kshv-miR-K12-1,kshv-miR-K12-3,kshv-miR-K12-7
NM_005239	201328_at,201329_s_at	TR(1..3672)CDS(197..1606)	2114	ETS2	Homo sapiens v-ets erythroblastosis virus E26 oncogene homolog 2 (avian) (ETS2), mRNA.	-0.531377748969863	7.09608497025106	0.0119935110852228	TRUE	kshv-miR-K12-6-3p,kshv-miR-K12-2,kshv-miR-K12-1,kshv-miR-K12-9*,kshv-miR-K12-9
NM_016337	217838_s_at	TR(1..1853)CDS(88..1344)	51466	EVL	Homo sapiens Enah/Vasp-like (EVL), mRNA.	-1.80642959296505	7.52598848858568	5.99315009185496e-06	TRUE	kshv-miR-K12-6-5p
NM_001991	32259_at,239197_s_at,203249_at	TR(1..4654)CDS(146..2389)	2145	EZH1	Homo sapiens enhancer of zeste homolog 1 (Drosophila) (EZH1), mRNA.	-0.88806704363265	6.02031500861806	0.0314063932794462	TRUE	kshv-miR-K12-5,kshv-miR-K12-2,kshv-miR-K12-1,kshv-miR-K12-11,kshv-miR-K12-9*
NM_031208	227960_s_at	TR(1..1705)CDS(7..681)	81889	FAHD1	Homo sapiens fumarylacetoacetate hydrolase domain containing 1 (FAHD1), nuclear gene encoding mitochondrial protein, transcript variant 2, mRNA.	-0.822957708652501	7.7558031335859	0.000101599929361048	TRUE	kshv-miR-K12-1,kshv-miR-K12-3
NM_001035254	212400_at	TR(1..3844)CDS(80..1234)	399665	FAM102A	Homo sapiens family with sequence similarity 102, member A (FAM102A), transcript variant 1, mRNA.	-1.70866110710246	8.45612705933896	0.000116793361980667	TRUE	kshv-miR-K12-6-5p,kshv-miR-K12-9*
NM_001010883	226568_at	TR(1..5359)CDS(81..1163)	284611	FAM102B	Homo sapiens family with sequence similarity 102, member B (FAM102B), mRNA.	-1.43204341684361	7.6019799767649	0.0285187022684711	TRUE	kshv-miR-K12-2,kshv-miR-K12-11,kshv-miR-K12-6-5p,kshv-miR-K12-4-3p,kshv-miR-K12-9
NM_021214	225436_at	TR(1..2408)CDS(120..1109)	58489	FAM108C1	Homo sapiens family with sequence similarity 108, member C1 (FAM108C1), mRNA.	-1.04568996214546	5.98547500738488	0.0256318053264851	TRUE	kshv-miR-K12-1
NM_152678	226965_at	TR(1..4679)CDS(72..1898)	201627	FAM116A	Homo sapiens family with sequence similarity 116, member A (FAM116A), mRNA.	-0.510372012674146	10.1073465682012	0.0444567869982423	TRUE	kshv-miR-K12-8,kshv-miR-K12-1,kshv-miR-K12-3,kshv-miR-K12-4-3p,kshv-miR-K12-9*,kshv-miR-K12-9
NM_017911	219629_at,226475_at	TR(1..2928)CDS(290..1363)	55007	FAM118A	Homo sapiens family with sequence similarity 118, member A (FAM118A), transcript variant 2, mRNA.	-0.74832605438088	4.12071380006476	0.000424407895732235	TRUE	kshv-miR-K12-2,kshv-miR-K12-3,kshv-miR-K12-9*
NM_145284	225362_at	TR(1..3766)CDS(428..1174)	159090	FAM122B	Homo sapiens family with sequence similarity 122B (FAM122B), mRNA.	-0.820456799931463	4.65218819396279	0.0217240858117407	TRUE	kshv-miR-K12-3,kshv-miR-K12-4-3p
NM_173607	227029_at	TR(1..2946)CDS(61..771)	283635	FAM177A1	Homo sapiens family with sequence similarity 177, member A1 (FAM177A1), transcript variant 1, mRNA.	-1.57658319172355	6.39800959997017	0.00107327074259289	TRUE	kshv-miR-K12-5,kshv-miR-K12-1,kshv-miR-K12-11,kshv-miR-K12-3,kshv-miR-K12-4-3p
NM_033088	225226_at	TR(1..3290)CDS(20..2533)	85369	FAM40A	Homo sapiens family with sequence similarity 40, member A (FAM40A), mRNA.	-0.577713904508972	5.83452737572903	0.0134711666804810	TRUE	kshv-miR-K12-1,kshv-miR-K12-3,kshv-miR-K12-4-3p,kshv-miR-K12-9*
NM_018693	222119_s_at,219208_at	TR(1..2567)CDS(208..2268)	80204	FBXO11	Homo sapiens F-box protein 11 (FBXO11), transcript variant 2, mRNA.	-0.626991754479046	6.39913590621713	0.00362347431819869	TRUE	kshv-miR-K12-1
NM_001080469	205310_at	TR(1..2990)CDS(124..1935)	23403	FBXO46	Homo sapiens F-box protein 46 (FBXO46), mRNA.	-0.716732983967532	7.15744995255799	0.0191980024187369	TRUE	kshv-miR-K12-9*,kshv-miR-K12-7
NM_018438	231769_at	TR(1..1565)CDS(167..1048)	26270	FBXO6	Homo sapiens F-box protein 6 (FBXO6), mRNA.	-1.53080596539195	4.45264065737212	0.00180106860238541	TRUE	kshv-miR-K12-1
NM_012180	223240_at,1554806_a_at	TR(1..2564)CDS(851..1810)	26269	FBXO8	Homo sapiens F-box protein 8 (FBXO8), mRNA.	-0.647411829082972	5.48433186066052	0.0117092650991103	TRUE	kshv-miR-K12-9
NM_033632	229419_at,218751_s_at,222729_at	TR(1..3896)CDS(150..2273)	55294	FBXW7	Homo sapiens F-box and WD repeat domain containing 7 (FBXW7), transcript variant 1, mRNA.	-1.04637347778387	5.70656194567804	0.00198470987583885	TRUE	kshv-miR-K12-2
NM_014824	203620_s_at	TR(1..4507)CDS(222..2444)	9873	FCHSD2	Homo sapiens FCH and double SH3 domains 2 (FCHSD2), mRNA.	-0.587850447933931	8.32828681036341	0.0475526329962867	TRUE	kshv-miR-K12-2,kshv-miR-K12-1,kshv-miR-K12-11,kshv-miR-K12-4-3p,kshv-miR-K12-4-5p,kshv-miR-K12-9
NM_020177	213341_at	TR(1..5813)CDS(563..2416)	56929	FEM1C	Homo sapiens fem-1 homolog c (C. elegans) (FEM1C), mRNA.	-1.09310997335893	6.78041193574974	0.00139296084577165	TRUE	kshv-miR-K12-2,kshv-miR-K12-11,kshv-miR-K12-3,kshv-miR-K12-4-3p,kshv-miR-K12-4-5p
NM_031471	223303_at	TR(1..2506)CDS(89..2080)	83706	FERMT3	Homo sapiens fermitin family homolog 3 (Drosophila) (FERMT3), transcript variant URP2SF, mRNA.	-0.69658092622749	7.71336862720172	0.00281400033867139	TRUE	kshv-miR-K12-6-3p,kshv-miR-K12-9*
NM_000801	210187_at	TR(1..1655)CDS(175..501)	2280	FKBP1A	Homo sapiens FK506 binding protein 1A, 12kDa (FKBP1A), transcript variant 12B, mRNA.	-1.20748472898989	6.02030572174402	0.0413880742862931	TRUE	kshv-miR-K12-3,kshv-miR-K12-6-5p
NM_001136040	217866_at	TR(1..3567)CDS(91..1506)	79869	FLJ12529	Homo sapiens pre-mRNA cleavage factor I, 59 kDa subunit (FLJ12529), mRNA.	-0.598372271396885	7.75705326042585	7.87880061971027e-06	TRUE	kshv-miR-K12-6-5p,kshv-miR-K12-9*
NM_001077419	219182_at,64900_at	TR(1..3034)CDS(535..1137)	79583	FLJ22167	Homo sapiens hypothetical protein FLJ22167 (FLJ22167), transcript variant 3, mRNA.	-1.60582080675097	6.03569501613865	0.00186428507464979	TRUE	kshv-miR-K12-1,kshv-miR-K12-4-3p
NM_144610	1553292_s_at	TR(1..1433)CDS(33..857)	124923	FLJ25006	Homo sapiens uncharacterized serine/threonine-protein kinase SgK494 (FLJ25006), mRNA.	-1.85786909039869	5.69366765444358	0.00979454439282284	TRUE	kshv-miR-K12-1,kshv-miR-K12-4-3p
XM_001717968	225724_at	TR(1..3094)CDS(1..1071)	379025	FLJ31306	PREDICTED: Homo sapiens hypothetical protein FLJ31306 (FLJ31306), mRNA.	-1.87512817196427	7.61464266892013	0.0163611759311563	TRUE	kshv-miR-K12-8,kshv-miR-K12-6-3p,kshv-miR-K12-5,kshv-miR-K12-1,kshv-miR-K12-4-3p,kshv-miR-K12-9*,kshv-miR-K12-7
NM_001457	208614_s_at,208613_s_at	TR(1..9463)CDS(166..7974)	2317	FLNB	Homo sapiens filamin B, beta (actin binding protein 278) (FLNB), mRNA.	-1.15430802312536	6.42058443830314	1.88055485684663e-06	TRUE	kshv-miR-K12-1,kshv-miR-K12-6-5p,kshv-miR-K12-9*
NM_024619	218210_at	TR(1..1781)CDS(27..956)	79672	FN3KRP	Homo sapiens fructosamine-3-kinase-related protein (FN3KRP), mRNA.	-0.566787725777218	6.99655450936003	0.0357716353009054	TRUE	kshv-miR-K12-6-3p,kshv-miR-K12-1,kshv-miR-K12-6-5p
NM_015308	212232_at	TR(1..4127)CDS(154..3207)	23360	FNBP4	Homo sapiens formin binding protein 4 (FNBP4), mRNA.	-1.39600273145509	9.24954924694907	0.0199843453887513	TRUE	kshv-miR-K12-4-3p
NM_004958	202288_at	TR(1..8733)CDS(122..7771)	2475	FRAP1	Homo sapiens FK506 binding protein 12-rapamycin associated protein 1 (FRAP1), mRNA.	-0.486650680251430	7.0005963221177	0.00194036624321869	TRUE	kshv-miR-K12-1,kshv-miR-K12-6-5p,kshv-miR-K12-7
NM_001099642	222811_at	TR(1..4040)CDS(407..2719)	55783	FTSJD1	Homo sapiens FtsJ methyltransferase domain containing 1 (FTSJD1), transcript variant 2, mRNA.	-0.518910128185767	7.98432481594479	0.0141819723653664	TRUE	kshv-miR-K12-6-3p,kshv-miR-K12-5,kshv-miR-K12-3,kshv-miR-K12-4-5p
NM_003902	203091_at	TR(1..2884)CDS(90..2024)	8880	FUBP1	Homo sapiens far upstream element (FUSE) binding protein 1 (FUBP1), mRNA.	-1.14995605998873	7.8580418909621	5.54804668404821e-05	TRUE	kshv-miR-K12-2,kshv-miR-K12-11
NM_000147	202838_at	TR(1..2095)CDS(46..1446)	2517	FUCA1	Homo sapiens fucosidase, alpha-L- 1, tissue (FUCA1), mRNA.	-1.57452721962027	6.27030426307266	1.62989327817946e-05	TRUE	kshv-miR-K12-6-3p,kshv-miR-K12-3
NM_178156	1554930_a_at,203988_s_at	TR(1..3677)CDS(1100..2827)	2530	FUT8	Homo sapiens fucosyltransferase 8 (alpha (1,6) fucosyltransferase) (FUT8), transcript variant 3, mRNA.	-1.48395208958553	5.7121961963264	4.4795193745913e-06	TRUE	kshv-miR-K12-9*,kshv-miR-K12-9
NM_003506	203987_at	TR(1..3768)CDS(277..2397)	8323	FZD6	Homo sapiens frizzled homolog 6 (Drosophila) (FZD6), mRNA.	-1.90326347749952	4.39310567480103	8.14822621796976e-05	TRUE	kshv-miR-K12-2,kshv-miR-K12-1,kshv-miR-K12-4-5p
NM_001042351	202275_at	TR(1..2270)CDS(114..1661)	2539	G6PD	Homo sapiens glucose-6-phosphate dehydrogenase (G6PD), transcript variant 2, mRNA.	-0.577020841554013	6.22565608983496	0.0222723418011869	TRUE	kshv-miR-K12-6-5p,kshv-miR-K12-9*
NM_031412	208868_s_at,208869_s_at	TR(1..1885)CDS(241..594)	23710	GABARAPL1	Homo sapiens GABA(A) receptor-associated protein like 1 (GABARAPL1), mRNA.	-1.14287952832936	5.56268746734987	0.0050058900402589	TRUE	kshv-miR-K12-2,kshv-miR-K12-11,kshv-miR-K12-6-5p
NM_015892	203066_at	TR(1..4713)CDS(514..2199)	51363	GALNAC4S-6ST	Homo sapiens B cell RAG associated protein (GALNAC4S-6ST), mRNA.	-1.18528459031207	2.91736598831111	0.0389054828783891	FALSE	kshv-miR-K12-5,kshv-miR-K12-1
NM_002051	209604_s_at,209602_s_at,209603_at	TR(1..3067)CDS(558..1889)	2625	GATA3	Homo sapiens GATA binding protein 3 (GATA3), transcript variant 2, mRNA.	-0.67222372778043	3.29446772486456	0.00175390826953542	TRUE	kshv-miR-K12-1,kshv-miR-K12-11
NM_178831	1553971_a_at	TR(1..4033)CDS(224..715)	352954	GATS	Homo sapiens opposite strand transcription unit to STAG3 (GATS), mRNA.	-1.68884503109631	4.2387785272359	0.00794755087603324	TRUE	kshv-miR-K12-1,kshv-miR-K12-9*,kshv-miR-K12-7
NM_014291	36475_at,205164_at	TR(1..1470)CDS(21..1280)	23464	GCAT	Homo sapiens glycine C-acetyltransferase (2-amino-3-ketobutyrate coenzyme A ligase) (GCAT), nuclear gene encoding mitochondrial protein, mRNA.	-0.720598441392841	7.54100870434203	0.0161278062062145	TRUE	kshv-miR-K12-3,kshv-miR-K12-9*
NM_002061	203925_at,236140_at	TR(1..3074)CDS(294..1118)	2730	GCLM	Homo sapiens glutamate-cysteine ligase, modifier subunit (GCLM), mRNA.	-0.690397340393696	8.4875348334612	0.0361732823745078	TRUE	kshv-miR-K12-1,kshv-miR-K12-4-3p,kshv-miR-K12-9*,kshv-miR-K12-4-5p
NM_001097635	239761_at,205505_at	TR(1..5524)CDS(480..1766)	2650	GCNT1	Homo sapiens glucosaminyl (N-acetyl) transferase 1, core 2 (beta-1,6-N-acetylglucosaminyltransferase) (GCNT1), transcript variant 4, mRNA.	-1.514307967884	3.68360432814799	5.94014494106033e-07	TRUE	kshv-miR-K12-6-3p,kshv-miR-K12-1,kshv-miR-K12-11,kshv-miR-K12-3,kshv-miR-K12-4-5p
NM_017686	1554154_at,219473_at	TR(1..8885)CDS(300..1793)	54834	GDAP2	Homo sapiens ganglioside induced differentiation associated protein 2 (GDAP2), transcript variant 1, mRNA.	-0.634989411080552	4.08729603481828	0.0104142397302970	TRUE	kshv-miR-K12-2,kshv-miR-K12-11,kshv-miR-K12-3,kshv-miR-K12-4-3p,kshv-miR-K12-9*,kshv-miR-K12-4-5p
NM_002056	202722_s_at,227027_at,202721_s_at	TR(1..8642)CDS(180..2225)	2673	GFPT1	Homo sapiens glutamine-fructose-6-phosphate transaminase 1 (GFPT1), mRNA.	-1.29177769159401	7.06949519822243	0.000589729012088931	TRUE	kshv-miR-K12-2,kshv-miR-K12-3,kshv-miR-K12-4-3p,kshv-miR-K12-9,kshv-miR-K12-11,kshv-miR-K12-1,kshv-miR-K12-6-5p,kshv-miR-K12-4-5p,kshv-miR-K12-9*
NM_017655	219970_at	TR(1..2838)CDS(191..1138)	54810	GIPC2	Homo sapiens GIPC PDZ domain containing family, member 2 (GIPC2), mRNA.	-1.49374827772901	3.12755703219867	0.0261356844857086	TRUE	kshv-miR-K12-4-3p,kshv-miR-K12-9
NM_014905	203159_at,203157_s_at,203158_s_at	TR(1..4348)CDS(265..2274)	2744	GLS	Homo sapiens glutaminase (GLS), nuclear gene encoding mitochondrial protein, mRNA.	-0.945855159317663	5.58373194108261	0.00181314441659675	TRUE	kshv-miR-K12-1,kshv-miR-K12-11,kshv-miR-K12-3,kshv-miR-K12-6-5p,kshv-miR-K12-9*
NM_018178	218361_at	TR(1..3208)CDS(218..1075)	55204	GOLPH3L	Homo sapiens golgi phosphoprotein 3-like (GOLPH3L), mRNA.	-0.88849387000554	7.61811986925147	0.00298393930925403	TRUE	kshv-miR-K12-6-3p,kshv-miR-K12-2,kshv-miR-K12-11,kshv-miR-K12-3
NM_031899	215749_s_at	TR(1..3057)CDS(99..1421)	64689	GORASP1	Homo sapiens golgi reassembly stacking protein 1, 65kDa (GORASP1), mRNA.	-1.76614232815436	5.30399440488174	0.0116310208408074	TRUE	kshv-miR-K12-4-3p
NM_001007025	213021_at,204630_s_at,213020_at	TR(1..5224)CDS(27..773)	9527	GOSR1	Homo sapiens golgi SNAP receptor complex member 1 (GOSR1), transcript variant 2, mRNA.	-0.564937030809106	7.50102641239392	0.00825589838683231	TRUE	kshv-miR-K12-1,kshv-miR-K12-3,kshv-miR-K12-6-5p,kshv-miR-K12-9*,kshv-miR-K12-7
NM_014373	223423_at	TR(1..2021)CDS(591..1607)	26996	GPR160	Homo sapiens G protein-coupled receptor 160 (GPR160), mRNA.	-1.04246219222451	7.4814955921139	0.0198117831698581	TRUE	kshv-miR-K12-3
NM_024531	222155_s_at	TR(1..1952)CDS(330..1667)	79581	GPR172A	Homo sapiens G protein-coupled receptor 172A (GPR172A), mRNA.	-0.754231534853234	4.96384364924109	0.0132227214645009	TRUE	kshv-miR-K12-11
NM_017577	219313_at	TR(1..3770)CDS(77..2065)	54762	GRAMD1C	Homo sapiens GRAM domain containing 1C (GRAMD1C), mRNA.	-1.39861129215309	4.05264980832999	0.000172275826265338	TRUE	kshv-miR-K12-6-3p,kshv-miR-K12-2,kshv-miR-K12-1,kshv-miR-K12-4-5p
NM_002086	223049_at,215075_s_at	TR(1..3303)CDS(358..1011)	2885	GRB2	Homo sapiens growth factor receptor-bound protein 2 (GRB2), transcript variant 1, mRNA.	-0.970354457710947	9.8280362216263	0.000102702149647885	TRUE	kshv-miR-K12-1,kshv-miR-K12-4-3p,kshv-miR-K12-4-5p
NM_014552	222830_at,1552685_a_at	TR(1..3576)CDS(142..1998)	29841	GRHL1	Homo sapiens grainyhead-like 1 (Drosophila) (GRHL1), transcript variant 1, mRNA.	-0.773035311946357	2.98163122284511	0.000102393303353153	TRUE	kshv-miR-K12-2,kshv-miR-K12-1,kshv-miR-K12-4-3p,kshv-miR-K12-7
NM_004128	209595_at	TR(1..1469)CDS(161..910)	2963	GTF2F2	Homo sapiens general transcription factor IIF, polypeptide 2, 30kDa (GTF2F2), mRNA.	-0.840380302981434	8.21534302640247	0.000156516651291482	TRUE	kshv-miR-K12-1
NM_014170	221046_s_at,223486_at	TR(1..1364)CDS(48..902)	29083	GTPBP8	Homo sapiens GTP-binding protein 8 (putative) (GTPBP8), transcript variant 1, mRNA.	-1.19522460354950	8.25254994937367	7.81324792363358e-08	TRUE	kshv-miR-K12-4-5p
NM_020771	227471_at	TR(1..4576)CDS(278..3007)	57531	HACE1	Homo sapiens HECT domain and ankyrin repeat containing, E3 ubiquitin protein ligase 1 (HACE1), mRNA.	-1.26963411973639	6.74976471047996	0.025147900938019	TRUE	kshv-miR-K12-4-3p,kshv-miR-K12-4-5p
NM_001098416	217937_s_at	TR(1..4190)CDS(196..3060)	51564	HDAC7	Homo sapiens histone deacetylase 7 (HDAC7), transcript variant 4, mRNA.	-1.05540020642593	6.75436810965254	0.000297516049338854	TRUE	kshv-miR-K12-6-3p,kshv-miR-K12-3
NM_020733	213069_at,212822_at	TR(1..9156)CDS(69..4214)	57493	HEG1	Homo sapiens HEG homolog 1 (zebrafish) (HEG1), mRNA.	-1.51660822631304	6.19135343090595	0.00508490732015341	TRUE	kshv-miR-K12-6-3p,kshv-miR-K12-5,kshv-miR-K12-2,kshv-miR-K12-1,kshv-miR-K12-3,kshv-miR-K12-4-5p,kshv-miR-K12-9
NM_014877	203674_at,225910_at	TR(1..13847)CDS(188..6016)	9931	HELZ	Homo sapiens helicase with zinc finger (HELZ), mRNA.	-0.824157319782025	7.64143651850282	0.0143739917660324	TRUE	kshv-miR-K12-2,kshv-miR-K12-11,kshv-miR-K12-3,kshv-miR-K12-6-5p,kshv-miR-K12-4-3p,kshv-miR-K12-4-5p
NM_001040708	44783_s_at,218839_at	TR(1..2331)CDS(201..1127)	23462	HEY1	Homo sapiens hairy/enhancer-of-split related with YRPW motif 1 (HEY1), transcript variant 2, mRNA.	-1.35389945565014	5.92385424226623	0.0110016202037851	TRUE	kshv-miR-K12-6-5p,kshv-miR-K12-9*,kshv-miR-K12-4-5p
NM_002729	204689_at,215933_s_at	TR(1..1772)CDS(64..876)	3087	HHEX	Homo sapiens hematopoietically expressed homeobox (HHEX), mRNA.	-1.58864019744552	4.05062496134156	0.000117632918799024	TRUE	kshv-miR-K12-1,kshv-miR-K12-4-3p
NM_032558	223073_at	TR(1..3312)CDS(270..1790)	84641	HIATL1	Homo sapiens hippocampus abundant transcript-like 1 (HIATL1), mRNA.	-0.654836550649635	9.87995765870843	0.00665365687340559	TRUE	kshv-miR-K12-5,kshv-miR-K12-1,kshv-miR-K12-4-3p
NM_152740	231955_s_at,224812_at	TR(1..2006)CDS(196..1206)	11112	HIBADH	Homo sapiens 3-hydroxyisobutyrate dehydrogenase (HIBADH), mRNA.	-1.09880247907635	6.44336710767308	0.00729242140696713	TRUE	kshv-miR-K12-5
NM_014056	242317_at	TR(1..2781)CDS(123..404)	25994	HIGD1A	Homo sapiens HIG1 domain family, member 1A (HIGD1A), transcript variant 3, mRNA.	-1.25786532554614	5.05318866939975	0.0435610094706317	TRUE	kshv-miR-K12-1,kshv-miR-K12-3,kshv-miR-K12-6-5p,kshv-miR-K12-9*,kshv-miR-K12-9
NM_006734	212642_s_at,212641_at	TR(1..9732)CDS(744..8084)	3097	HIVEP2	Homo sapiens human immunodeficiency virus type I enhancer binding protein 2 (HIVEP2), mRNA.	-0.529304473273689	7.37544508712956	0.0099594759570911	TRUE	kshv-miR-K12-2,kshv-miR-K12-11,kshv-miR-K12-4-5p
NM_018200	218152_at	TR(1..3898)CDS(202..1245)	10363	HMG20A	Homo sapiens high-mobility group 20A (HMG20A), mRNA.	-0.62716042872271	9.25921559017742	9.81095094269475e-06	TRUE	kshv-miR-K12-6-3p,kshv-miR-K12-2,kshv-miR-K12-6-5p,kshv-miR-K12-9*
NM_002129	208808_s_at	TR(1..1527)CDS(194..823)	3148	HMGB2	Homo sapiens high-mobility group box 2 (HMGB2), transcript variant 1, mRNA.	-0.733056764914227	13.1383420989189	0.00948659923714534	TRUE	kshv-miR-K12-3
NM_032410	226395_at,236192_at,224359_s_at,1558315_s_at	TR(1..14460)CDS(243..2399)	84376	HOOK3	Homo sapiens hook homolog 3 (Drosophila) (HOOK3), mRNA.	-0.593202653775873	5.65388437168105	0.00961146372037045	TRUE	kshv-miR-K12-5,kshv-miR-K12-2,kshv-miR-K12-1,kshv-miR-K12-11,kshv-miR-K12-9*,kshv-miR-K12-4-5p
NM_032855	1552623_at	TR(1..2369)CDS(532..1590)	84941	HSH2D	Homo sapiens hematopoietic SH2 domain containing (HSH2D), mRNA.	-0.582098048095238	6.3143599628005	0.00629156722977561	TRUE	kshv-miR-K12-1,kshv-miR-K12-4-5p
NM_006644	206976_s_at	TR(1..3680)CDS(399..2975)	10808	HSPH1	Homo sapiens heat shock 105kDa/110kDa protein 1 (HSPH1), mRNA.	-0.80712721264619	9.39612461811936	4.92427212634439e-05	TRUE	kshv-miR-K12-2
NM_001130991	200825_s_at	TR(1..4498)CDS(70..3069)	10525	HYOU1	Homo sapiens hypoxia up-regulated 1 (HYOU1), transcript variant 2, mRNA.	-1.19739013601845	8.33148518549581	0.0156529896300438	TRUE	kshv-miR-K12-5,kshv-miR-K12-2,kshv-miR-K12-1,kshv-miR-K12-6-5p
NM_000201	215485_s_at,202638_s_at,202637_s_at	TR(1..3249)CDS(320..1918)	3383	ICAM1	Homo sapiens intercellular adhesion molecule 1 (ICAM1), mRNA.	-0.710093817112643	5.31007523574217	0.00148713175295621	TRUE	kshv-miR-K12-9*
NM_014920	204569_at	TR(1..6127)CDS(380..2278)	22858	ICK	Homo sapiens intestinal cell (MAK-like) kinase (ICK), transcript variant 1, mRNA.	-1.45127319921607	6.25296800230798	0.00367052913533515	TRUE	kshv-miR-K12-6-3p,kshv-miR-K12-1,kshv-miR-K12-3,kshv-miR-K12-4-3p,kshv-miR-K12-4-5p
NM_001545	204868_at	TR(1..888)CDS(3..623)	3396	ICT1	Homo sapiens immature colon carcinoma transcript 1 (ICT1), mRNA.	-0.541739523552963	8.89381083605503	0.00217897866289839	TRUE	kshv-miR-K12-9*
NM_000202	202439_s_at,217432_s_at,212223_at	TR(1..5830)CDS(199..1851)	3423	IDS	Homo sapiens iduronate 2-sulfatase (IDS), transcript variant 1, mRNA.	-0.489924069538441	5.75062862082912	0.0207334148179042	TRUE	kshv-miR-K12-1,kshv-miR-K12-3,kshv-miR-K12-4-5p
NM_001562	206295_at	TR(1..1145)CDS(221..802)	3606	IL18	Homo sapiens interleukin 18 (interferon-gamma-inducing factor) (IL18), mRNA.	-0.757775567585008	3.36427820671011	0.00221852744673644	FALSE	kshv-miR-K12-1
NM_021798	219971_at,221658_s_at	TR(1..3248)CDS(121..1737)	50615	IL21R	Homo sapiens interleukin 21 receptor (IL21R), transcript variant 1, mRNA.	-1.37749184446836	6.10264799035429	9.03666670237745e-06	TRUE	kshv-miR-K12-3,kshv-miR-K12-9*,kshv-miR-K12-7
NM_004843	217702_at,205926_at,222062_at	TR(1..3258)CDS(424..2334)	9466	IL27RA	Homo sapiens interleukin 27 receptor, alpha (IL27RA), mRNA.	-0.5436303982616	3.91188385734256	0.0141007929762302	TRUE	kshv-miR-K12-1,kshv-miR-K12-3,kshv-miR-K12-9*,kshv-miR-K12-9
NM_170743	1555499_a_at,244261_at	TR(1..4549)CDS(14..1576)	163702	IL28RA	Homo sapiens interleukin 28 receptor, alpha (interferon, lambda receptor) (IL28RA), transcript variant 1, mRNA.	-1.31300547218356	4.46927448060018	0.000218275664549026	TRUE	kshv-miR-K12-5,kshv-miR-K12-1,kshv-miR-K12-11,kshv-miR-K12-6-5p,kshv-miR-K12-9*
NM_017553	225357_s_at	TR(1..6249)CDS(214..4884)	54617	INO80	Homo sapiens INO80 homolog (S. cerevisiae) (INO80), mRNA.	-0.529267935971548	4.80600824903166	0.00838573105930857	TRUE	kshv-miR-K12-5,kshv-miR-K12-3
NM_005540	213643_s_at,213804_at	TR(1..4469)CDS(95..2836)	3633	INPP5B	Homo sapiens inositol polyphosphate-5-phosphatase, 75kDa (INPP5B), nuclear gene encoding mitochondrial protein, mRNA.	-0.562347910022512	6.31948659332923	0.0252730788375048	TRUE	kshv-miR-K12-5,kshv-miR-K12-1,kshv-miR-K12-6-5p,kshv-miR-K12-9*
NM_019892	204706_at	TR(1..3440)CDS(386..2320)	56623	INPP5E	Homo sapiens inositol polyphosphate-5-phosphatase, 72 kDa (INPP5E), mRNA.	-0.675340329172531	7.38784011205671	0.0190708948993908	TRUE	kshv-miR-K12-6-3p,kshv-miR-K12-3
NM_006633	203474_at	TR(1..5769)CDS(223..4950)	10788	IQGAP2	Homo sapiens IQ motif containing GTPase activating protein 2 (IQGAP2), mRNA.	-1.13909507257012	4.66595735722361	0.0336428441252464	TRUE	kshv-miR-K12-4-3p
NM_002199	203275_at	TR(1..2302)CDS(201..1250)	3660	IRF2	Homo sapiens interferon regulatory factor 2 (IRF2), mRNA.	-0.983025868766021	6.3610359942352	1.22010104840580e-05	TRUE	kshv-miR-K12-3
NM_002460	216986_s_at,204562_at	TR(1..5314)CDS(114..1469)	3662	IRF4	Homo sapiens interferon regulatory factor 4 (IRF4), mRNA.	-0.630840500126649	5.07637769352846	0.000418437942128382	TRUE	kshv-miR-K12-2,kshv-miR-K12-1,kshv-miR-K12-6-5p,kshv-miR-K12-9*
NM_031483	239101_at,235057_at,217094_s_at,209743_s_at	TR(1..6379)CDS(193..2781)	83737	ITCH	Homo sapiens itchy E3 ubiquitin protein ligase homolog (mouse) (ITCH), mRNA.	-0.491732106073665	4.39829276465742	0.0221817337918300	TRUE	kshv-miR-K12-5,kshv-miR-K12-1,kshv-miR-K12-7
NM_002210	202351_at	TR(1..7037)CDS(267..3413)	3685	ITGAV	Homo sapiens integrin, alpha V (vitronectin receptor, alpha polypeptide, antigen CD51) (ITGAV), mRNA.	-0.519840225898676	6.78307446228228	0.0108069370545443	TRUE	kshv-miR-K12-2,kshv-miR-K12-11,kshv-miR-K12-6-5p
NM_002221	203723_at	TR(1..6162)CDS(341..3181)	3707	ITPKB	Homo sapiens inositol 1,4,5-trisphosphate 3-kinase B (ITPKB), mRNA.	-1.47834181955685	7.50449745331569	0.00125136215098272	TRUE	kshv-miR-K12-6-3p,kshv-miR-K12-1,kshv-miR-K12-6-5p,kshv-miR-K12-9*,kshv-miR-K12-7
NM_001099952	203710_at,216944_s_at,211323_s_at	TR(1..9858)CDS(349..8481)	3708	ITPR1	Homo sapiens inositol 1,4,5-triphosphate receptor, type 1 (ITPR1), transcript variant 1, mRNA.	-0.542005075905159	6.9405599443739	0.00197462056563486	TRUE	kshv-miR-K12-2,kshv-miR-K12-6-5p
NM_001034841	227514_at,1568619_s_at,228074_at,227954_at,227792_at	TR(1..7694)CDS(503..2110)	162073	ITPRIPL2	Homo sapiens inositol 1,4,5-triphosphate receptor interacting protein-like 2 (ITPRIPL2), mRNA.	-0.728380454667146	3.55133898763189	0.0139150490927661	TRUE	kshv-miR-K12-2,kshv-miR-K12-3,kshv-miR-K12-9,kshv-miR-K12-1,kshv-miR-K12-5,kshv-miR-K12-6-5p,kshv-miR-K12-4-5p,kshv-miR-K12-9*
NM_000214	209097_s_at,216268_s_at,209098_s_at	TR(1..5988)CDS(517..4173)	182	JAG1	Homo sapiens jagged 1 (Alagille syndrome) (JAG1), mRNA.	-0.705661863884759	4.55498665781456	0.0129010026316910	TRUE	kshv-miR-K12-3,kshv-miR-K12-3*,kshv-miR-K12-6-5p,kshv-miR-K12-4-3p,kshv-miR-K12-9*
NM_030647	225142_at,221778_at	TR(1..9178)CDS(5..2830)	80853	JHDM1D	Homo sapiens jumonji C domain containing histone demethylase 1 homolog D (S. cerevisiae) (JHDM1D), mRNA.	-1.37109380858551	5.52480909487943	0.0111436226192787	TRUE	kshv-miR-K12-6-3p,kshv-miR-K12-2,kshv-miR-K12-1,kshv-miR-K12-11,kshv-miR-K12-3,kshv-miR-K12-6-5p,kshv-miR-K12-4-3p,kshv-miR-K12-9*,kshv-miR-K12-7,kshv-miR-K12-4-5p
NM_152405	241985_at,226352_at	TR(1..9098)CDS(521..3487)	133746	JMY	Homo sapiens junction-mediating and regulatory protein (JMY), mRNA.	-1.05487835722745	7.69395559445306	0.00194308563964369	TRUE	kshv-miR-K12-6-3p,kshv-miR-K12-5,kshv-miR-K12-2,kshv-miR-K12-11,kshv-miR-K12-3,kshv-miR-K12-7
NM_021078	202182_at	TR(1..3127)CDS(61..2574)	2648	KAT2A	Homo sapiens K(lysine) acetyltransferase 2A (KAT2A), mRNA.	-0.881073233594653	7.70726074902194	0.000343126054224597	TRUE	kshv-miR-K12-11
NM_152903	226479_at,1553111_a_at	TR(1..5228)CDS(290..2314)	89890	KBTBD6	Homo sapiens kelch repeat and BTB (POZ) domain containing 6 (KBTBD6), mRNA.	-0.800005066271467	4.98148628791156	0.0466446808932662	TRUE	kshv-miR-K12-1,kshv-miR-K12-3,kshv-miR-K12-4-3p,kshv-miR-K12-9*
NM_032505	239835_at	TR(1..4617)CDS(65..1792)	84541	KBTBD8	Homo sapiens kelch repeat and BTB (POZ) domain containing 8 (KBTBD8), mRNA.	-0.859613420803189	7.41055711155558	0.0033271410995423	TRUE	kshv-miR-K12-3,kshv-miR-K12-4-3p,kshv-miR-K12-9*,kshv-miR-K12-9
NM_004823	223658_at	TR(1..2671)CDS(111..1052)	9424	KCNK6	Homo sapiens potassium channel, subfamily K, member 6 (KCNK6), mRNA.	-1.17183510466063	5.04143536053578	0.0216520344511396	TRUE	kshv-miR-K12-1,kshv-miR-K12-6-5p,kshv-miR-K12-9*
NM_016121	217894_at	TR(1..3946)CDS(295..2742)	51133	KCTD3	Homo sapiens potassium channel tetramerisation domain containing 3 (KCTD3), mRNA.	-1.22808152559041	8.16218710136798	0.0279461593386135	TRUE	kshv-miR-K12-11,kshv-miR-K12-3,kshv-miR-K12-6-5p
NM_001080394	212523_s_at	TR(1..3220)CDS(10..2757)	23514	KIAA0146	Homo sapiens KIAA0146 (KIAA0146), mRNA.	-1.41713689668836	6.26175612256913	5.7538182153426e-05	TRUE	kshv-miR-K12-2,kshv-miR-K12-1
NM_014615	212056_at,212057_at	TR(1..7395)CDS(75..3728)	23199	KIAA0182	Homo sapiens KIAA0182 (KIAA0182), transcript variant 1, mRNA.	-0.774280209077705	9.06162004807245	0.00426521752222072	TRUE	kshv-miR-K12-8,kshv-miR-K12-2,kshv-miR-K12-3,kshv-miR-K12-6-5p
NM_014774	201775_s_at,201778_s_at,201776_s_at,201777_s_at	TR(1..5794)CDS(978..2465)	9813	KIAA0494	Homo sapiens KIAA0494 (KIAA0494), mRNA.	-0.76541825865874	5.9130693625075	0.00860184843873075	TRUE	kshv-miR-K12-2,kshv-miR-K12-3,kshv-miR-K12-6-5p,kshv-miR-K12-9*,kshv-miR-K12-9
NM_015058	214231_s_at,212946_at	TR(1..7169)CDS(71..5788)	23078	KIAA0564	Homo sapiens KIAA0564 (KIAA0564), transcript variant 1, mRNA.	-0.501215354780703	6.8376717455105	0.0124642625940136	TRUE	kshv-miR-K12-4-3p,kshv-miR-K12-9
NM_015323	212634_at,212633_at	TR(1..4219)CDS(49..2433)	23376	KIAA0776	Homo sapiens KIAA0776 (KIAA0776), mRNA.	-0.690322962090532	9.0758089243217	0.0399604068524024	TRUE	kshv-miR-K12-11,kshv-miR-K12-4-3p
NM_020336	224678_at,221736_at,221738_at	TR(1..8636)CDS(258..4742)	57148	KIAA1219	Homo sapiens KIAA1219 (KIAA1219), mRNA.	-0.617598637983068	5.54226392565057	0.00187734183272569	TRUE	kshv-miR-K12-6-3p,kshv-miR-K12-2,kshv-miR-K12-1,kshv-miR-K12-6-5p,kshv-miR-K12-9*,kshv-miR-K12-4-5p,kshv-miR-K12-9
NM_017769	223255_at,223254_s_at,223256_at,223257_at	TR(1..5581)CDS(155..2275)	55632	KIAA1333	Homo sapiens KIAA1333 (KIAA1333), mRNA.	-1.68334875881048	6.40101443720112	0.00039463103372031	TRUE	kshv-miR-K12-11,kshv-miR-K12-3,kshv-miR-K12-4-3p,kshv-miR-K12-9*,kshv-miR-K12-4-5p
NM_033426	225623_at	TR(1..4397)CDS(180..1379)	85457	KIAA1737	Homo sapiens KIAA1737 (KIAA1737), mRNA.	-0.65844441090776	7.59878174416814	0.0404382640116380	TRUE	kshv-miR-K12-2,kshv-miR-K12-3,kshv-miR-K12-6-5p,kshv-miR-K12-9*,kshv-miR-K12-7,kshv-miR-K12-4-5p
NM_017596	204411_at	TR(1..9895)CDS(318..5192)	23046	KIF21B	Homo sapiens kinesin family member 21B (KIF21B), mRNA.	-0.741149355358703	6.5392526588827	0.00184327575887413	TRUE	kshv-miR-K12-1,kshv-miR-K12-6-5p,kshv-miR-K12-9*
NM_007054	213623_at,228680_at	TR(1..6257)CDS(155..2254)	11127	KIF3A	Homo sapiens kinesin family member 3A (KIF3A), mRNA.	-0.569543133952901	6.05148677575094	0.0261674311570227	TRUE	kshv-miR-K12-1,kshv-miR-K12-11,kshv-miR-K12-4-3p,kshv-miR-K12-9*
NM_004798	203943_at,225205_at	TR(1..6103)CDS(168..2411)	9371	KIF3B	Homo sapiens kinesin family member 3B (KIF3B), mRNA.	-0.592417534184946	6.87851211204814	0.00012858042328816	TRUE	kshv-miR-K12-6-3p,kshv-miR-K12-1,kshv-miR-K12-3,kshv-miR-K12-6-5p
NM_020805	228377_at,1554942_a_at	TR(1..4261)CDS(389..2275)	57565	KLHL14	Homo sapiens kelch-like 14 (Drosophila) (KLHL14), mRNA.	-0.696411181741168	2.73172609944346	0.010762772683428	TRUE	kshv-miR-K12-6-3p,kshv-miR-K12-2,kshv-miR-K12-3,kshv-miR-K12-7
NM_017644	221986_s_at,226158_at,242088_at,221985_at	TR(1..7331)CDS(296..2098)	54800	KLHL24	Homo sapiens kelch-like 24 (Drosophila) (KLHL24), mRNA.	-0.761165397600968	7.32172637955456	0.0281912080469105	TRUE	kshv-miR-K12-2,kshv-miR-K12-11,kshv-miR-K12-3,kshv-miR-K12-4-3p,kshv-miR-K12-9*,kshv-miR-K12-4-5p,kshv-miR-K12-9
NM_130446	1560397_s_at,1560396_at,228167_at,1555275_a_at	TR(1..6320)CDS(59..1924)	89857	KLHL6	Homo sapiens kelch-like 6 (Drosophila) (KLHL6), mRNA.	-0.858059668919877	7.9661778132045	0.000231715120289801	TRUE	kshv-miR-K12-8,kshv-miR-K12-4-3p,kshv-miR-K12-9,kshv-miR-K12-6-3p,kshv-miR-K12-1,kshv-miR-K12-5,kshv-miR-K12-4-5p,kshv-miR-K12-9*
NM_006148	200618_at	TR(1..3846)CDS(76..861)	3927	LASP1	Homo sapiens LIM and SH3 protein 1 (LASP1), mRNA.	-1.12838391922057	10.6664702578555	0.000327512400685531	TRUE	kshv-miR-K12-6-3p,kshv-miR-K12-2,kshv-miR-K12-3,kshv-miR-K12-6-5p,kshv-miR-K12-7,kshv-miR-K12-9
NM_022075	222212_s_at	TR(1..2465)CDS(348..1490)	29956	LASS2	Homo sapiens LAG1 homolog, ceramide synthase 2 (LASS2), transcript variant 2, mRNA.	-0.595676094453124	9.41024192349476	0.0231569357845173	TRUE	kshv-miR-K12-5,kshv-miR-K12-7
NM_015627	221790_s_at,57082_at	TR(1..2935)CDS(115..1041)	26119	LDLRAP1	Homo sapiens low density lipoprotein receptor adaptor protein 1 (LDLRAP1), mRNA.	-1.27940768706427	4.74815091009776	0.00596313755135419	TRUE	kshv-miR-K12-6-3p,kshv-miR-K12-5,kshv-miR-K12-11,kshv-miR-K12-3,kshv-miR-K12-4-3p,kshv-miR-K12-7
NM_005779	212658_at	TR(1..5061)CDS(677..1363)	10184	LHFPL2	Homo sapiens lipoma HMGIC fusion partner-like 2 (LHFPL2), mRNA.	-1.19277854670503	8.0764955830046	0.000231980553181306	TRUE	kshv-miR-K12-6-3p,kshv-miR-K12-1,kshv-miR-K12-11,kshv-miR-K12-3,kshv-miR-K12-4-3p
NM_014564	221670_s_at	TR(1..2413)CDS(120..1328)	8022	LHX3	Homo sapiens LIM homeobox 3 (LHX3), transcript variant 2, mRNA.	-0.566589586395423	2.59079539612671	0.0191586431070640	FALSE	kshv-miR-K12-6-5p
NM_194451	214045_at	TR(1..1631)CDS(74..1042)	11019	LIAS	Homo sapiens lipoic acid synthetase (LIAS), nuclear gene encoding mitochondrial protein, transcript variant 2, mRNA.	-0.501408214891834	7.78852456778638	0.0365867037192011	TRUE	kshv-miR-K12-2,kshv-miR-K12-1
NM_000234	202726_at	TR(1..3083)CDS(121..2880)	3978	LIG1	Homo sapiens ligase I, DNA, ATP-dependent (LIG1), mRNA.	-0.615477277522299	8.94095281984442	0.044011856900957	TRUE	kshv-miR-K12-4-5p
NM_013975	207348_s_at,204123_at	TR(1..3701)CDS(109..3138)	3980	LIG3	Homo sapiens ligase III, DNA, ATP-dependent (LIG3), nuclear gene encoding mitochondrial protein, transcript variant alpha, mRNA.	-0.852871434161413	5.84319184867318	0.0488395639271543	TRUE	kshv-miR-K12-9*,kshv-miR-K12-4-5p
NM_016357	222456_s_at,217892_s_at,222457_s_at	TR(1..3745)CDS(175..2454)	51474	LIMA1	Homo sapiens LIM domain and actin binding 1 (LIMA1), transcript variant b, mRNA.	-0.501123084402416	4.41410867004874	0.0269052628566616	TRUE	kshv-miR-K12-3,kshv-miR-K12-4-3p,kshv-miR-K12-7,kshv-miR-K12-4-5p
NM_030576	218600_at	TR(1..3232)CDS(179..562)	80774	LIMD2	Homo sapiens LIM domain containing 2 (LIMD2), mRNA.	-0.870262733709046	6.39600919750008	0.0247775458731089	TRUE	kshv-miR-K12-6-5p,kshv-miR-K12-9*,kshv-miR-K12-7
NM_018362	221568_s_at,219399_at	TR(1..4729)CDS(5..598)	55327	LIN7C	Homo sapiens lin-7 homolog C (C. elegans) (LIN7C), mRNA.	-0.523275777710998	7.8606058172846	0.000299999246744981	TRUE	kshv-miR-K12-2,kshv-miR-K12-11,kshv-miR-K12-3,kshv-miR-K12-6-5p,kshv-miR-K12-4-3p,kshv-miR-K12-4-5p,kshv-miR-K12-9
NM_014583	218574_s_at	TR(1..1754)CDS(115..1212)	29995	LMCD1	Homo sapiens LIM and cysteine-rich domains 1 (LMCD1), mRNA.	-1.00725760720230	5.39694375198994	0.0373839654634906	TRUE	kshv-miR-K12-5,kshv-miR-K12-3,kshv-miR-K12-4-3p,kshv-miR-K12-9*,kshv-miR-K12-7
NM_032737	216952_s_at	TR(1..4653)CDS(88..1890)	84823	LMNB2	Homo sapiens lamin B2 (LMNB2), mRNA.	-0.960477624713007	8.07061044763872	0.00149443599183018	TRUE	kshv-miR-K12-6-3p,kshv-miR-K12-5,kshv-miR-K12-9*
XM_001722758	1557062_at	TR(1..4547)CDS(2589..3053)	100129195	LOC100129195	PREDICTED: Homo sapiens hypothetical protein LOC100129195 (LOC100129195), mRNA.	-0.625938515464055	2.76926703402756	0.00104165065296706	TRUE	kshv-miR-K12-3,kshv-miR-K12-9*,kshv-miR-K12-9
XM_001725037	235360_at	TR(1..1660)CDS(1..162)	100131989	LOC100131989	PREDICTED: Homo sapiens hypothetical protein LOC100131989 (LOC100131989), mRNA.	-0.538962288086646	4.15341528813325	0.000615557998479108	TRUE	kshv-miR-K12-2,kshv-miR-K12-1,kshv-miR-K12-6-5p
XM_001722051	225062_at	TR(1..2461)CDS(290..673)	100132181	LOC100132181	PREDICTED: Homo sapiens hypothetical protein LOC100132181 (LOC100132181), mRNA.	-0.613580680191067	2.67186699904815	0.00112934931406335	FALSE	kshv-miR-K12-6-5p,kshv-miR-K12-4-3p
XM_001722534	244640_at,238958_at	TR(1..7717)CDS(166..3432)	342892	LOC342892	PREDICTED: Homo sapiens hypothetical protein LOC342892 (LOC342892), mRNA.	-1.03473527653476	3.19296607477687	0.000123433591863756	TRUE	kshv-miR-K12-1,kshv-miR-K12-3,kshv-miR-K12-4-3p,kshv-miR-K12-9*,kshv-miR-K12-7,kshv-miR-K12-4-5p
XM_943193	226413_at,238916_at	TR(1..2202)CDS(212..574)	400027	LOC400027	PREDICTED: Homo sapiens hypothetical gene supported by BC047417, transcript variant 4 (LOC400027), mRNA.	-0.569214494016276	6.22454049745499	0.0122612958378877	TRUE	kshv-miR-K12-11,kshv-miR-K12-6-5p,kshv-miR-K12-9*,kshv-miR-K12-4-5p
XM_001721526	237005_at	TR(1..2898)CDS(405..932)	442075	LOC442075	PREDICTED: Homo sapiens weakly similar to serine/threonine protein kinase Kp78 (LOC442075), mRNA.	-1.15185391298543	6.78886844077156	0.025197800520275	TRUE	kshv-miR-K12-1,kshv-miR-K12-11,kshv-miR-K12-7
NM_001040715	1558041_a_at	TR(1..3416)CDS(776..2191)	653319	LOC653319	Homo sapiens hypothetical protein LOC653319 (LOC653319), mRNA.	-0.995754685722442	3.07926278535404	0.00108392959646558	FALSE	kshv-miR-K12-1,kshv-miR-K12-9*
XM_001721562	229444_at	TR(1..878)CDS(130..540)	729776	LOC729776	PREDICTED: Homo sapiens hypothetical LOC729776 (LOC729776), mRNA.	-1.01058447621144	6.64494000112197	0.0188379669307603	TRUE	kshv-miR-K12-4-5p
XM_001725674	241912_at	TR(1..6687)CDS(245..2815)	730051	LOC730051	PREDICTED: Homo sapiens similar to hCG2044798 (LOC730051), mRNA.	-1.17492843482068	4.53395539929856	0.000609346190462774	TRUE	kshv-miR-K12-2,kshv-miR-K12-11,kshv-miR-K12-3,kshv-miR-K12-9*,kshv-miR-K12-4-5p,kshv-miR-K12-9
NM_002318	202999_s_at,202997_s_at,202998_s_at	TR(1..3810)CDS(340..2664)	4017	LOXL2	Homo sapiens lysyl oxidase-like 2 (LOXL2), mRNA.	-0.653081599031987	3.36803533953294	0.00076693689846073	TRUE	kshv-miR-K12-6-5p
NM_004720	206723_s_at,206722_s_at	TR(1..1803)CDS(140..1195)	9170	LPAR2	Homo sapiens lysophosphatidic acid receptor 2 (LPAR2), mRNA.	-0.649153275547215	4.32956549759831	0.0139652290383269	TRUE	kshv-miR-K12-9*,kshv-miR-K12-4-5p
NM_024830	201818_at	TR(1..3994)CDS(118..1722)	79888	LPCAT1	Homo sapiens lysophosphatidylcholine acyltransferase 1 (LPCAT1), mRNA.	-0.802640532982759	7.89234191552498	6.16671311233631e-05	TRUE	kshv-miR-K12-4-5p
NM_014873	227476_at,1555058_a_at	TR(1..7802)CDS(228..1340)	9926	LPGAT1	Homo sapiens lysophosphatidylglycerol acyltransferase 1 (LPGAT1), mRNA.	-0.697926999493532	5.65536526649439	0.00446531796154481	TRUE	kshv-miR-K12-2,kshv-miR-K12-3,kshv-miR-K12-4-3p,kshv-miR-K12-6-3p,kshv-miR-K12-11,kshv-miR-K12-1,kshv-miR-K12-5,kshv-miR-K12-6-5p,kshv-miR-K12-9*,kshv-miR-K12-4-5p
NM_006152	35974_at,204674_at	TR(1..2826)CDS(1035..2534)	4033	LRMP	Homo sapiens lymphoid-restricted membrane protein (LRMP), mRNA.	-1.37620818394798	12.2421183494016	0.00422254908660419	TRUE	kshv-miR-K12-5,kshv-miR-K12-9*
NM_014045	201412_at	TR(1..3252)CDS(554..2695)	26020	LRP10	Homo sapiens low density lipoprotein receptor-related protein 10 (LRP10), mRNA.	-0.818436027082293	6.73373508152271	0.0433723261646447	TRUE	kshv-miR-K12-9
NM_145256	1559502_s_at	TR(1..2430)CDS(643..1560)	126364	LRRC25	Homo sapiens leucine rich repeat containing 25 (LRRC25), mRNA.	-1.17920579608706	3.78363892558104	0.0057034198190457	FALSE	kshv-miR-K12-6-5p,kshv-miR-K12-9*
NM_001137552	223492_s_at,201862_s_at	TR(1..4510)CDS(293..2719)	9208	LRRFIP1	Homo sapiens leucine rich repeat (in FLII) interacting protein 1 (LRRFIP1), transcript variant 3, mRNA.	-1.08161208251123	8.8883087611925	0.0264347283419111	TRUE	kshv-miR-K12-1,kshv-miR-K12-3
NM_001105659	235498_at	TR(1..2865)CDS(193..2067)	127255	LRRIQ3	Homo sapiens leucine-rich repeats and IQ motif containing 3 (LRRIQ3), mRNA.	-1.06862131636379	4.56779170786356	1.41814225044094e-05	TRUE	kshv-miR-K12-5,kshv-miR-K12-6-5p
NM_024652	219441_s_at	TR(1..7647)CDS(320..6367)	79705	LRRK1	Homo sapiens leucine-rich repeat kinase 1 (LRRK1), mRNA.	-1.04139877559364	7.5717248668276	0.000254783023390152	TRUE	kshv-miR-K12-6-5p,kshv-miR-K12-9*
NM_001114093	222099_s_at,212132_at,212131_at	TR(1..3772)CDS(197..1588)	26065	LSM14A	Homo sapiens LSM14A, SCD6 homolog A (S. cerevisiae) (LSM14A), transcript variant 1, mRNA.	-0.491084440250772	10.259194269925	0.0106762696808115	TRUE	kshv-miR-K12-1,kshv-miR-K12-11,kshv-miR-K12-4-3p
NM_018032	1557067_s_at,223295_s_at	TR(1..2082)CDS(112..1089)	55692	LUC7L	Homo sapiens LUC7-like (S. cerevisiae) (LUC7L), transcript variant 1, mRNA.	-1.21374119087456	6.91313336762037	0.0150446657484140	TRUE	kshv-miR-K12-1,kshv-miR-K12-6-5p,kshv-miR-K12-4-3p
NM_021020	221719_s_at,221721_s_at,219042_at,47550_at	TR(1..5459)CDS(112..1902)	11178	LZTS1	Homo sapiens leucine zipper, putative tumor suppressor 1 (LZTS1), mRNA.	-1.16669166077827	3.7562913369208	2.06108443610125e-05	TRUE	kshv-miR-K12-6-5p,kshv-miR-K12-9*,kshv-miR-K12-4-5p
NM_012090	208633_s_at,208634_s_at	TR(1..17821)CDS(206..16498)	23499	MACF1	Homo sapiens microtubule-actin crosslinking factor 1 (MACF1), transcript variant 1, mRNA.	-0.89849359509495	7.57347629556681	0.0120050624702255	TRUE	kshv-miR-K12-1,kshv-miR-K12-6-5p
NM_005908	203778_at	TR(1..3311)CDS(101..2740)	4126	MANBA	Homo sapiens mannosidase, beta A, lysosomal (MANBA), mRNA.	-0.875015298868297	6.74726248532676	0.00389270287338776	TRUE	kshv-miR-K12-3,kshv-miR-K12-4-5p
NM_005204	205027_s_at	TR(1..3096)CDS(697..2100)	1326	MAP3K8	Homo sapiens mitogen-activated protein kinase kinase kinase 8 (MAP3K8), mRNA.	-1.51855702984768	6.18445882490824	0.00502215778764112	TRUE	kshv-miR-K12-3,kshv-miR-K12-6-5p
NM_002375	200835_s_at,212567_s_at,243_g_at,200836_s_at,235066_at,212566_at,33850_at	TR(1..6337)CDS(527..3985)	4134	MAP4	Homo sapiens microtubule-associated protein 4 (MAP4), transcript variant 1, mRNA.	-0.533771958173817	5.91249705741271	0.0213670297569228	TRUE	kshv-miR-K12-6-5p,kshv-miR-K12-9*,kshv-miR-K12-7
NM_003668	212871_at	TR(1..2060)CDS(260..1675)	8550	MAPKAPK5	Homo sapiens mitogen-activated protein kinase-activated protein kinase 5 (MAPKAPK5), transcript variant 1, mRNA.	-0.607957615143456	7.84395448813383	0.0237745766601760	TRUE	kshv-miR-K12-6-5p
NM_023009	200644_at	TR(1..1584)CDS(201..788)	65108	MARCKSL1	Homo sapiens MARCKS-like 1 (MARCKSL1), mRNA.	-0.654747002512652	10.2180727248728	0.00639128395621308	TRUE	kshv-miR-K12-3
NM_015016	213045_at	TR(1..5893)CDS(1..3930)	23031	MAST3	Homo sapiens microtubule associated serine/threonine kinase 3 (MAST3), mRNA.	-0.837066910042953	7.24681009562415	0.0423921861388890	TRUE	kshv-miR-K12-6-3p,kshv-miR-K12-9*
NM_005918	209036_s_at	TR(1..1321)CDS(87..1103)	4191	MDH2	Homo sapiens malate dehydrogenase 2, NAD (mitochondrial) (MDH2), nuclear gene encoding mitochondrial protein, mRNA.	-0.619092387891897	12.0545824664661	0.00824916531527797	TRUE	kshv-miR-K12-1
NM_002393	225742_at,236814_at,205655_at,235162_at	TR(1..10073)CDS(163..1635)	4194	MDM4	Homo sapiens Mdm4 p53 binding protein homolog (mouse) (MDM4), transcript variant 1, mRNA.	-0.759967565550724	5.19932116095651	0.0113124897667108	TRUE	kshv-miR-K12-6-3p,kshv-miR-K12-2,kshv-miR-K12-1,kshv-miR-K12-3,kshv-miR-K12-4-3p,kshv-miR-K12-9*,kshv-miR-K12-4-5p
NM_004229	202610_s_at,202611_s_at	TR(1..6768)CDS(141..4505)	9282	MED14	Homo sapiens mediator complex subunit 14 (MED14), mRNA.	-0.539056670166871	7.90058201735827	0.00050479499986952	TRUE	kshv-miR-K12-2,kshv-miR-K12-1,kshv-miR-K12-3,kshv-miR-K12-4-3p,kshv-miR-K12-4-5p
NM_004264	209363_s_at,209362_at	TR(1..1782)CDS(31..465)	9412	MED21	Homo sapiens mediator complex subunit 21 (MED21), mRNA.	-0.913820676255588	5.99531700936651	0.0397927732992227	TRUE	kshv-miR-K12-6-3p,kshv-miR-K12-1,kshv-miR-K12-4-3p
NM_017592	225708_at	TR(1..3604)CDS(38..703)	55588	MED29	Homo sapiens mediator complex subunit 29 (MED29), mRNA.	-0.913507104380012	6.98530786649657	0.00215098587715984	TRUE	kshv-miR-K12-1,kshv-miR-K12-3,kshv-miR-K12-9*,kshv-miR-K12-9
NM_212554	226631_at	TR(1..2638)CDS(38..913)	399818	METTL10	Homo sapiens methyltransferase like 10 (METTL10), mRNA.	-1.39103114585691	8.74326232853994	0.000112007134605200	TRUE	kshv-miR-K12-2,kshv-miR-K12-3,kshv-miR-K12-4-3p
NM_022840	219698_s_at,232194_at	TR(1..3691)CDS(781..2199)	64863	METTL4	Homo sapiens methyltransferase like 4 (METTL4), mRNA.	-1.26755442827071	5.68647437902866	0.0140008099870385	TRUE	kshv-miR-K12-4-3p
NM_016459	221286_s_at,223565_at	TR(1..845)CDS(61..630)	51237	MGC29506	Homo sapiens hypothetical protein MGC29506 (MGC29506), mRNA.	-0.611897243392479	8.7852779334854	0.0442549814933038	TRUE	kshv-miR-K12-9*
NM_024308	218756_s_at	TR(1..1608)CDS(215..997)	79154	MGC4172	Homo sapiens short-chain dehydrogenase/reductase (MGC4172), mRNA.	-1.05243088755794	6.55953186263299	0.0147898545471309	TRUE	kshv-miR-K12-3
NM_145791	1565162_s_at	TR(1..987)CDS(144..611)	4257	MGST1	Homo sapiens microsomal glutathione S-transferase 1 (MGST1), transcript variant 1c, mRNA.	-0.536395532303474	11.2554092035755	0.0259372446116307	TRUE	kshv-miR-K12-6-5p,kshv-miR-K12-4-3p
NM_015241	212715_s_at,229474_at	TR(1..9471)CDS(354..6362)	57553	MICAL3	Homo sapiens microtubule associated monoxygenase, calponin and LIM domain containing 3 (MICAL3), transcript variant 1, mRNA.	-0.88726750760607	3.55065663810113	0.00329853727217635	TRUE	kshv-miR-K12-5,kshv-miR-K12-3,kshv-miR-K12-9*
NM_013255	242984_at,225526_at,244171_at,235067_at,204423_at	TR(1..11157)CDS(25..2232)	4289	MKLN1	Homo sapiens muskelin 1, intracellular mediator containing kelch motifs (MKLN1), mRNA.	-0.487834659781713	5.43511202477992	0.0322257169720823	TRUE	kshv-miR-K12-6-3p,kshv-miR-K12-5,kshv-miR-K12-1,kshv-miR-K12-11,kshv-miR-K12-3,kshv-miR-K12-6-5p,kshv-miR-K12-4-3p,kshv-miR-K12-9*,kshv-miR-K12-4-5p
NM_001040108	204838_s_at	TR(1..7911)CDS(217..4578)	27030	MLH3	Homo sapiens mutL homolog 3 (E. coli) (MLH3), transcript variant 1, mRNA.	-0.731237283729117	4.73113681763953	0.0426985329137257	TRUE	kshv-miR-K12-2,kshv-miR-K12-6-5p,kshv-miR-K12-9*,kshv-miR-K12-7
NM_005937	224784_at	TR(1..7500)CDS(14..3295)	4302	MLLT6	Homo sapiens myeloid/lymphoid or mixed-lineage leukemia (trithorax homolog, Drosophila); translocated to, 6 (MLLT6), mRNA.	-0.735007724785492	7.63516079496849	0.00632198779683233	TRUE	kshv-miR-K12-1,kshv-miR-K12-6-5p,kshv-miR-K12-4-5p
NM_001039396	226818_at	TR(1..4527)CDS(157..2307)	219972	MPEG1	Homo sapiens macrophage expressed gene 1 (MPEG1), mRNA.	-1.03314622884906	2.5899422321971	0.0237259562534194	TRUE	kshv-miR-K12-1,kshv-miR-K12-11,kshv-miR-K12-3,kshv-miR-K12-9
NM_014763	238448_at,203465_at	TR(1..7827)CDS(26..904)	9801	MRPL19	Homo sapiens mitochondrial ribosomal protein L19 (MRPL19), nuclear gene encoding mitochondrial protein, mRNA.	-0.495660727968487	6.88033804125778	0.0112736680094433	TRUE	kshv-miR-K12-5,kshv-miR-K12-2,kshv-miR-K12-1,kshv-miR-K12-11,kshv-miR-K12-4-3p,kshv-miR-K12-9*,kshv-miR-K12-7
NM_022497	224869_s_at,224015_s_at,224873_s_at	TR(1..4574)CDS(116..637)	64432	MRPS25	Homo sapiens mitochondrial ribosomal protein S25 (MRPS25), nuclear gene encoding mitochondrial protein, mRNA.	-0.95734469190405	7.45538748964165	0.00601209452003398	TRUE	kshv-miR-K12-1,kshv-miR-K12-11,kshv-miR-K12-3,kshv-miR-K12-6-5p,kshv-miR-K12-4-5p
NM_018133	218733_at	TR(1..4696)CDS(734..2467)	55167	MSL2	Homo sapiens male-specific lethal 2 homolog (Drosophila) (MSL2), mRNA.	-0.896510361673005	7.49843013970541	1.42971447331069e-05	TRUE	kshv-miR-K12-2,kshv-miR-K12-3,kshv-miR-K12-4-3p,kshv-miR-K12-4-5p
NM_002451	204956_at,211363_s_at,216685_s_at,231984_at	TR(1..4937)CDS(114..965)	4507	MTAP	Homo sapiens methylthioadenosine phosphorylase (MTAP), mRNA.	-0.693263236372458	6.10849886237853	0.0233710806018044	TRUE	kshv-miR-K12-2,kshv-miR-K12-1,kshv-miR-K12-3,kshv-miR-K12-4-3p,kshv-miR-K12-9*
NM_001040409	201761_at	TR(1..2306)CDS(484..1230)	10797	MTHFD2	Homo sapiens methylenetetrahydrofolate dehydrogenase (NADP+ dependent) 2, methenyltetrahydrofolate cyclohydrolase (MTHFD2), nuclear gene encoding mitochondrial protein, transcript variant 2, mRNA.	-0.740367325178725	12.7141760870247	0.0112277086045885	TRUE	kshv-miR-K12-4-3p
NM_014967	203678_at	TR(1..4835)CDS(239..3292)	22909	MTMR15	Homo sapiens myotubularin related protein 15 (MTMR15), mRNA.	-1.47510736693177	6.37914065618942	2.83626682447632e-06	TRUE	kshv-miR-K12-5,kshv-miR-K12-1,kshv-miR-K12-4-3p
NM_001010891	241779_at,226528_at	TR(1..7950)CDS(28..966)	345778	MTX3	Homo sapiens metaxin 3 (MTX3), mRNA.	-1.02830700546158	5.20755102992859	0.0151345996479033	TRUE	kshv-miR-K12-2,kshv-miR-K12-3,kshv-miR-K12-4-3p,kshv-miR-K12-6-3p,kshv-miR-K12-11,kshv-miR-K12-1,kshv-miR-K12-6-5p,kshv-miR-K12-9*,kshv-miR-K12-7
NM_002357	206877_at,228846_at,226275_at	TR(1..5587)CDS(261..926)	4084	MXD1	Homo sapiens MAX dimerization protein 1 (MXD1), mRNA.	-0.73802860970751	5.08729734645807	0.000951072999622178	TRUE	kshv-miR-K12-6-3p,kshv-miR-K12-2,kshv-miR-K12-1,kshv-miR-K12-4-5p
NM_002473	211926_s_at	TR(1..7474)CDS(185..6067)	4627	MYH9	Homo sapiens myosin, heavy chain 9, non-muscle (MYH9), mRNA.	-0.740478517224998	7.21226652981726	0.00196409350791793	TRUE	kshv-miR-K12-2
NM_000259	227761_at,241966_at,204527_at	TR(1..12227)CDS(245..5812)	4644	MYO5A	Homo sapiens myosin VA (heavy chain 12, myoxin) (MYO5A), mRNA.	-0.810948797332372	4.25452481251389	0.000346924410589039	TRUE	kshv-miR-K12-6-3p,kshv-miR-K12-5,kshv-miR-K12-1,kshv-miR-K12-11,kshv-miR-K12-4-3p,kshv-miR-K12-7
NM_207481	239650_at	TR(1..3654)CDS(375..2147)	344148	NAP5	Homo sapiens Nck-associated protein 5 (NAP5), transcript variant 2, mRNA.	-1.41700444715287	3.05652305105426	0.0220184922510049	TRUE	kshv-miR-K12-1,kshv-miR-K12-6-5p,kshv-miR-K12-9*,kshv-miR-K12-4-5p
NM_017760	219588_s_at	TR(1..3950)CDS(146..3577)	54892	NCAPG2	Homo sapiens non-SMC condensin II complex, subunit G2 (NCAPG2), mRNA.	-1.05838823233446	8.96574588659502	0.0211840881986666	TRUE	kshv-miR-K12-3
NM_001004720	203315_at	TR(1..2326)CDS(66..1208)	8440	NCK2	Homo sapiens NCK adaptor protein 2 (NCK2), transcript variant 2, mRNA.	-0.565934003756327	4.37230937340948	0.025065628143057	FALSE	kshv-miR-K12-9
NM_016453	218697_at	TR(1..3023)CDS(95..2263)	51517	NCKIPSD	Homo sapiens NCK interacting protein with SH3 domain (NCKIPSD), transcript variant 1, mRNA.	-0.763085833454768	5.94779855104963	0.0144307277977024	TRUE	kshv-miR-K12-1,kshv-miR-K12-6-5p
NM_006311	200857_s_at	TR(1..7940)CDS(241..7563)	9611	NCOR1	Homo sapiens nuclear receptor co-repressor 1 (NCOR1), mRNA.	-1.26265480183850	6.89362819240647	0.000692175138227662	TRUE	kshv-miR-K12-1
NM_030571	222422_s_at,222423_at,217800_s_at	TR(1..3599)CDS(217..882)	80762	NDFIP1	Homo sapiens Nedd4 family interacting protein 1 (NDFIP1), mRNA.	-0.599757450461324	8.68844412813742	0.00281909659693431	TRUE	kshv-miR-K12-2,kshv-miR-K12-1,kshv-miR-K12-11
NM_032013	217286_s_at,221082_s_at,224368_s_at	TR(1..2964)CDS(83..1210)	57446	NDRG3	Homo sapiens NDRG family member 3 (NDRG3), transcript variant 1, mRNA.	-1.19380330025867	6.38545892947786	7.70196676572376e-05	TRUE	kshv-miR-K12-6-3p,kshv-miR-K12-3,kshv-miR-K12-6-5p,kshv-miR-K12-9*,kshv-miR-K12-9
NM_006154	213012_at	TR(1..5760)CDS(83..2785)	4734	NEDD4	Homo sapiens neural precursor cell expressed, developmentally down-regulated 4 (NEDD4), transcript variant 1, mRNA.	-1.36925005505775	5.04007277395835	0.000801409353062593	TRUE	kshv-miR-K12-6-3p,kshv-miR-K12-2,kshv-miR-K12-1,kshv-miR-K12-3
NM_015277	241396_at,212445_s_at,212448_at	TR(1..4870)CDS(114..2981)	23327	NEDD4L	Homo sapiens neural precursor cell expressed, developmentally down-regulated 4-like (NEDD4L), mRNA.	-0.784439060347526	6.53749877449771	0.000173621998047386	TRUE	kshv-miR-K12-3,kshv-miR-K12-6-5p,kshv-miR-K12-4-3p
NM_001001716	228388_at	TR(1..2213)CDS(99..1019)	4793	NFKBIB	Homo sapiens nuclear factor of kappa light polypeptide gene enhancer in B-cells inhibitor, beta (NFKBIB), transcript variant 2, mRNA.	-1.33583358562915	5.67455327067595	0.0108690869271556	TRUE	kshv-miR-K12-1,kshv-miR-K12-6-5p,kshv-miR-K12-9*
NM_031419	223218_s_at,223217_s_at	TR(1..3938)CDS(116..2272)	64332	NFKBIZ	Homo sapiens nuclear factor of kappa light polypeptide gene enhancer in B-cells inhibitor, zeta (NFKBIZ), transcript variant 1, mRNA.	-1.90183324821374	7.73257457877564	0.0484522346136882	TRUE	kshv-miR-K12-9*,kshv-miR-K12-7,kshv-miR-K12-9
NM_021705	204109_s_at,228433_at,215720_s_at,204108_at,204107_at	TR(1..6149)CDS(179..1135)	4800	NFYA	Homo sapiens nuclear transcription factor Y, alpha (NFYA), transcript variant 2, mRNA.	-0.511811469431027	4.94052093793209	0.0324536184401538	TRUE	kshv-miR-K12-1,kshv-miR-K12-11,kshv-miR-K12-3,kshv-miR-K12-4-3p,kshv-miR-K12-9*,kshv-miR-K12-4-5p
NM_178833	229491_at,1564746_at	TR(1..3377)CDS(873..2486)	133308	NHEDC2	Homo sapiens Na+/H+ exchanger domain containing 2 (NHEDC2), mRNA.	-0.67879023140136	5.07434515514274	0.00102189784323634	TRUE	kshv-miR-K12-6-3p
NM_015384	242352_at,212469_at,212483_at,213918_s_at,207108_s_at	TR(1..10389)CDS(500..8593)	25836	NIPBL	Homo sapiens Nipped-B homolog (Drosophila) (NIPBL), transcript variant B, mRNA.	-0.524537288822262	6.76251061683821	0.0226798148350381	TRUE	kshv-miR-K12-2,kshv-miR-K12-1,kshv-miR-K12-4-5p
NM_001040214	242002_at	TR(1..3315)CDS(278..904)	154215	NKAIN2	Homo sapiens Na+/K+ transporting ATPase interacting 2 (NKAIN2), mRNA.	-1.78747242171468	4.71552811776111	0.0164035848841746	TRUE	kshv-miR-K12-2,kshv-miR-K12-11,kshv-miR-K12-3,kshv-miR-K12-4-3p,kshv-miR-K12-9*,kshv-miR-K12-7
NM_024313	222057_at,219324_at	TR(1..2840)CDS(57..698)	79159	NOL12	Homo sapiens nucleolar protein 12 (NOL12), mRNA.	-0.591156557957223	5.81949954935127	0.0258427107076144	TRUE	kshv-miR-K12-6-3p,kshv-miR-K12-1,kshv-miR-K12-6-5p,kshv-miR-K12-9*
NM_017921	217796_s_at	TR(1..4401)CDS(183..2009)	55666	NPLOC4	Homo sapiens nuclear protein localization 4 homolog (S. cerevisiae) (NPLOC4), mRNA.	-0.673961713458574	6.97744968349217	0.00763501884960074	TRUE	kshv-miR-K12-1,kshv-miR-K12-4-3p,kshv-miR-K12-9*
NM_030763	221606_s_at,221238_at	TR(1..1865)CDS(69..917)	79366	NSBP1	Homo sapiens nucleosomal binding protein 1 (NSBP1), mRNA.	-0.595578966381961	5.52803305414279	0.0279516196889627	TRUE	kshv-miR-K12-4-5p
NM_030952	220987_s_at	TR(1..3443)CDS(128..2014)	81788	NUAK2	Homo sapiens NUAK family, SNF1-like kinase, 2 (NUAK2), mRNA.	-1.28254110580044	4.0349765150472	0.000101339921608255	TRUE	kshv-miR-K12-5,kshv-miR-K12-3,kshv-miR-K12-6-5p,kshv-miR-K12-9*
NM_006184	200646_s_at,200649_at	TR(1..2302)CDS(18..1403)	4924	NUCB1	Homo sapiens nucleobindin 1 (NUCB1), mRNA.	-0.577962518700063	5.97837588846993	0.0167876190448954	TRUE	kshv-miR-K12-5,kshv-miR-K12-6-5p,kshv-miR-K12-9*
NM_022731	229353_s_at,222424_s_at,224582_s_at,217802_s_at	TR(1..6453)CDS(261..992)	64710	NUCKS1	Homo sapiens nuclear casein kinase and cyclin-dependent kinase substrate 1 (NUCKS1), mRNA.	-0.776646869822936	9.19613620206376	0.00759882751063764	TRUE	kshv-miR-K12-2,kshv-miR-K12-3,kshv-miR-K12-6-5p,kshv-miR-K12-4-3p
NM_007006	202697_at,213461_at	TR(1..4407)CDS(148..831)	11051	NUDT21	Homo sapiens nudix (nucleoside diphosphate linked moiety X)-type motif 21 (NUDT21), mRNA.	-0.627191814683875	9.1932839026836	0.0132435648914526	TRUE	kshv-miR-K12-6-3p,kshv-miR-K12-2,kshv-miR-K12-3,kshv-miR-K12-4-5p
NM_199040	212183_at	TR(1..4813)CDS(399..944)	11163	NUDT4	Homo sapiens nudix (nucleoside diphosphate linked moiety X)-type motif 4 (NUDT4), transcript variant 2, mRNA.	-0.791525238511374	6.4027223452147	0.0153693718258222	TRUE	kshv-miR-K12-6-3p,kshv-miR-K12-2,kshv-miR-K12-11,kshv-miR-K12-3,kshv-miR-K12-6-5p,kshv-miR-K12-4-3p,kshv-miR-K12-9*,kshv-miR-K12-4-5p
NM_020772	224956_at,224958_at,224938_at,224939_at	TR(1..10897)CDS(90..2177)	57532	NUFIP2	Homo sapiens nuclear fragile X mental retardation protein interacting protein 2 (NUFIP2), mRNA.	-0.790994653565065	7.68371204231431	0.00222364304339843	TRUE	kshv-miR-K12-3,kshv-miR-K12-4-3p,kshv-miR-K12-9,kshv-miR-K12-11,kshv-miR-K12-1,kshv-miR-K12-5,kshv-miR-K12-4-5p,kshv-miR-K12-9*
NM_024923	220035_at,212315_s_at,213947_s_at,212316_at	TR(1..7191)CDS(84..5747)	23225	NUP210	Homo sapiens nucleoporin 210kDa (NUP210), mRNA.	-0.847522320407428	7.75004763618738	0.00109759481589019	TRUE	kshv-miR-K12-6-5p,kshv-miR-K12-9*
NM_138285	225470_at	TR(1..1649)CDS(104..1084)	129401	NUP35	Homo sapiens nucleoporin 35kDa (NUP35), mRNA.	-0.930220347334183	9.5849778191374	0.000839050030063246	TRUE	kshv-miR-K12-1,kshv-miR-K12-6-5p,kshv-miR-K12-4-3p
NM_001008564	204435_at,223984_s_at	TR(1..4299)CDS(247..2010)	9818	NUPL1	Homo sapiens nucleoporin like 1 (NUPL1), transcript variant 2, mRNA.	-1.12011649354063	8.3116165445657	0.0438183706231331	TRUE	kshv-miR-K12-1,kshv-miR-K12-9*
NM_002540	210415_s_at,225617_at	TR(1..3772)CDS(586..3003)	4957	ODF2	Homo sapiens outer dense fiber of sperm tails 2 (ODF2), transcript variant 1, mRNA.	-1.94199910711727	6.0923796121131	5.65198646461818e-07	TRUE	kshv-miR-K12-6-3p
NM_021980	202074_s_at,202073_at	TR(1..3376)CDS(233..1966)	10133	OPTN	Homo sapiens optineurin (OPTN), transcript variant 2, mRNA.	-1.28530284947462	4.46399122507973	0.00445006804183305	TRUE	kshv-miR-K12-2,kshv-miR-K12-1
NM_022353	220631_at,230032_at	TR(1..2339)CDS(535..1779)	64172	OSGEPL1	Homo sapiens O-sialoglycoprotein endopeptidase-like 1 (OSGEPL1), mRNA.	-0.594031216713471	6.22987162237435	0.0457211857455064	TRUE	kshv-miR-K12-6-5p,kshv-miR-K12-9*
NM_001136159	233933_s_at,1555426_a_at	TR(1..2426)CDS(213..1262)	55593	OTUD5	Homo sapiens OTU domain containing 5 (OTUD5), transcript variant 4, mRNA.	-0.721095897761922	4.94868587101534	0.0278230787547275	TRUE	kshv-miR-K12-6-3p
NM_002561	210448_s_at	TR(1..2206)CDS(285..1553)	5026	P2RX5	Homo sapiens purinergic receptor P2X, ligand-gated ion channel, 5 (P2RX5), transcript variant 1, mRNA.	-1.80009796127844	7.42732736852619	0.00153940782554245	TRUE	kshv-miR-K12-4-3p
NM_002577	208878_s_at,208877_at	TR(1..6139)CDS(323..1897)	5062	PAK2	Homo sapiens p21 protein (Cdc42/Rac)-activated kinase 2 (PAK2), mRNA.	-0.837194962911594	8.12047506487652	0.000570494062046935	TRUE	kshv-miR-K12-1,kshv-miR-K12-11,kshv-miR-K12-3,kshv-miR-K12-4-3p
NM_018216	218771_at	TR(1..2642)CDS(10..2331)	55229	PANK4	Homo sapiens pantothenate kinase 4 (PANK4), mRNA.	-0.673779814165968	6.95439393658529	0.00803266607439716	TRUE	kshv-miR-K12-3
NM_032632	228569_at,209388_at,222035_s_at	TR(1..4539)CDS(211..2448)	10914	PAPOLA	Homo sapiens poly(A) polymerase alpha (PAPOLA), mRNA.	-0.614154309542023	9.9208899497964	0.0298703866655366	TRUE	kshv-miR-K12-11
NM_001618	208644_at	TR(1..4001)CDS(172..3216)	142	PARP1	Homo sapiens poly (ADP-ribose) polymerase 1 (PARP1), mRNA.	-1.06102011197076	10.8066105955785	6.92835009702095e-05	TRUE	kshv-miR-K12-9
NM_018386	219940_s_at	TR(1..1753)CDS(82..1281)	55795	PCID2	Homo sapiens PCI domain containing 2 (PCID2), transcript variant 3, mRNA.	-0.613679780651441	9.09291582288784	0.00493013663633653	TRUE	kshv-miR-K12-3,kshv-miR-K12-4-3p
NM_022104	221762_s_at,222045_s_at,89948_at	TR(1..2703)CDS(315..2429)	63935	PCIF1	Homo sapiens PDX1 C-terminal inhibiting factor 1 (PCIF1), mRNA.	-0.491924276028975	5.44562589862764	0.0151576553425849	TRUE	kshv-miR-K12-9*
NM_145341	212594_at,202731_at,212593_s_at,202730_s_at	TR(1..3675)CDS(361..1737)	27250	PDCD4	Homo sapiens programmed cell death 4 (neoplastic transformation inhibitor) (PDCD4), transcript variant 2, mRNA.	-0.695493082950676	10.0646533747313	0.0047967839858440	TRUE	kshv-miR-K12-1,kshv-miR-K12-11,kshv-miR-K12-6-5p,kshv-miR-K12-4-3p,kshv-miR-K12-7
NM_005742	208638_at,216640_s_at	TR(1..2344)CDS(139..1461)	10130	PDIA6	Homo sapiens protein disulfide isomerase family A, member 6 (PDIA6), mRNA.	-0.689581515618981	10.6011667682563	0.0167424071285641	TRUE	kshv-miR-K12-3,kshv-miR-K12-4-3p,kshv-miR-K12-4-5p
NM_152835	227255_at	TR(1..4298)CDS(289..1314)	149420	PDIK1L	Homo sapiens PDLIM1 interacting kinase 1 like (PDIK1L), mRNA.	-0.537430617523493	8.14854258011372	0.0187135755080153	TRUE	kshv-miR-K12-1,kshv-miR-K12-3,kshv-miR-K12-6-5p,kshv-miR-K12-4-3p
NM_015200	213983_s_at,212138_at,213984_at,212140_at	TR(1..6726)CDS(197..4090)	23244	PDS5A	Homo sapiens PDS5, regulator of cohesion maintenance, homolog A (S. cerevisiae) (PDS5A), transcript variant 2, mRNA.	-0.880908774272036	7.52955532739754	0.00228057235500861	TRUE	kshv-miR-K12-6-3p,kshv-miR-K12-11,kshv-miR-K12-3
NM_001040152	212092_at,212094_at	TR(1..6628)CDS(480..1457)	23089	PEG10	Homo sapiens paternally expressed 10 (PEG10), transcript variant 1, mRNA.	-1.58216718613963	7.57938379631279	0.000255849997621967	TRUE	kshv-miR-K12-2,kshv-miR-K12-3,kshv-miR-K12-4-3p,kshv-miR-K12-9,kshv-miR-K12-6-3p,kshv-miR-K12-11,kshv-miR-K12-1,kshv-miR-K12-5,kshv-miR-K12-6-5p,kshv-miR-K12-4-5p
NM_053024	204992_s_at	TR(1..2117)CDS(99..521)	5217	PFN2	Homo sapiens profilin 2 (PFN2), transcript variant 1, mRNA.	-0.548181652767921	3.88017096236929	0.0332478683082928	TRUE	kshv-miR-K12-6-3p,kshv-miR-K12-2,kshv-miR-K12-4-3p
NM_032177	234405_s_at	TR(1..1751)CDS(23..1207)	51808	PHAX	Homo sapiens phosphorylated adaptor for RNA export (PHAX), mRNA.	-0.650931714903331	8.84454215175828	0.000141699298981298	TRUE	kshv-miR-K12-1
NM_024947	1552644_a_at,226508_at,238693_at	TR(1..12687)CDS(35..3022)	80012	PHC3	Homo sapiens polyhomeotic homolog 3 (Drosophila) (PHC3), mRNA.	-0.719231676532658	7.08054865932348	0.00325001222425604	TRUE	kshv-miR-K12-8,kshv-miR-K12-2,kshv-miR-K12-4-3p,kshv-miR-K12-9,kshv-miR-K12-6-3p,kshv-miR-K12-11,kshv-miR-K12-1,kshv-miR-K12-5,kshv-miR-K12-6-5p,kshv-miR-K12-4-5p,kshv-miR-K12-7,kshv-miR-K12-9*
NM_015651	227211_at,225533_at,227212_s_at	TR(1..4287)CDS(254..1996)	26147	PHF19	Homo sapiens PHD finger protein 19 (PHF19), transcript variant 1, mRNA.	-0.981071683422846	8.50855281617466	0.000586617909414659	TRUE	kshv-miR-K12-5,kshv-miR-K12-3,kshv-miR-K12-6-5p,kshv-miR-K12-9*,kshv-miR-K12-7
NM_015153	217951_s_at,217954_s_at,215718_s_at	TR(1..6947)CDS(27..6146)	23469	PHF3	Homo sapiens PHD finger protein 3 (PHF3), mRNA.	-0.707413771017529	8.2965613366829	0.0097809712739796	TRUE	kshv-miR-K12-1
NM_015107	212916_at	TR(1..5776)CDS(210..3284)	23133	PHF8	Homo sapiens PHD finger protein 8 (PHF8), mRNA.	-0.672359681665152	6.52845234140323	0.0132645803126245	TRUE	kshv-miR-K12-6-3p,kshv-miR-K12-5,kshv-miR-K12-9*,kshv-miR-K12-9
NM_000293	202738_s_at,238601_at,202739_s_at	TR(1..5491)CDS(53..3334)	5257	PHKB	Homo sapiens phosphorylase kinase, beta (PHKB), transcript variant 1, mRNA.	-0.60722605916037	6.67853838656969	0.0157311959877806	TRUE	kshv-miR-K12-2,kshv-miR-K12-4-3p
NM_020432	1554780_a_at,209780_at,217097_s_at,1554822_at,215286_s_at	TR(1..5013)CDS(127..2370)	57157	PHTF2	Homo sapiens putative homeodomain transcription factor 2 (PHTF2), transcript variant 2, mRNA.	-0.865064624804372	5.22904860922828	0.0135230050988794	TRUE	kshv-miR-K12-2,kshv-miR-K12-3,kshv-miR-K12-7
NM_006099	203035_s_at	TR(1..2902)CDS(92..1978)	10401	PIAS3	Homo sapiens protein inhibitor of activated STAT, 3 (PIAS3), mRNA.	-0.679911160937724	5.05696608206213	0.0431678093509457	TRUE	kshv-miR-K12-9
NM_025049	228252_at	TR(1..2659)CDS(67..1992)	80119	PIF1	Homo sapiens PIF1 5'-to-3' DNA helicase homolog (S. cerevisiae) (PIF1), mRNA.	-1.50542914867035	7.13816077963113	0.0428560894101525	TRUE	kshv-miR-K12-6-5p
NM_177531	230673_at	TR(1..14017)CDS(105..12836)	93035	PKHD1L1	Homo sapiens polycystic kidney and hepatic disease 1 (autosomal recessive)-like 1 (PKHD1L1), mRNA.	-0.874100890109392	7.14353578493377	0.0162963947032244	TRUE	kshv-miR-K12-4-3p
NM_002657	202924_s_at,202925_s_at	TR(1..5656)CDS(218..1708)	5326	PLAGL2	Homo sapiens pleiomorphic adenoma gene-like 2 (PLAGL2), mRNA.	-0.726782239132162	6.1058310527577	0.0266731380935229	TRUE	kshv-miR-K12-9*,kshv-miR-K12-7
NM_002664	203471_s_at,203470_s_at	TR(1..2866)CDS(163..1215)	5341	PLEK	Homo sapiens pleckstrin (PLEK), mRNA.	-0.746209603723373	8.31093218453704	0.00115159567257788	TRUE	kshv-miR-K12-5,kshv-miR-K12-2,kshv-miR-K12-1,kshv-miR-K12-3
NM_175058	228450_at	TR(1..4848)CDS(12..3377)	144100	PLEKHA7	Homo sapiens pleckstrin homology domain containing, family A member 7 (PLEKHA7), mRNA.	-1.10918043131056	6.69136164394665	0.00676463691629763	TRUE	kshv-miR-K12-9
NM_024613	218640_s_at,222699_s_at	TR(1..2905)CDS(248..997)	79666	PLEKHF2	Homo sapiens pleckstrin homology domain containing, family F (with FYVE domain) member 2 (PLEKHF2), mRNA.	-0.946147095673788	7.9464585892311	7.42216670784835e-05	TRUE	kshv-miR-K12-6-3p,kshv-miR-K12-2,kshv-miR-K12-3
NM_018049	218290_at	TR(1..1215)CDS(82..531)	55111	PLEKHJ1	Homo sapiens pleckstrin homology domain containing, family J member 1 (PLEKHJ1), mRNA.	-0.72629006647778	7.7787776687826	0.000254532509641694	TRUE	kshv-miR-K12-6-5p,kshv-miR-K12-7
NM_021127	204285_s_at,204286_s_at	TR(1..1954)CDS(219..383)	5366	PMAIP1	Homo sapiens phorbol-12-myristate-13-acetate-induced protein 1 (PMAIP1), mRNA.	-0.77900641924691	12.2248118081004	0.0088517566354522	TRUE	kshv-miR-K12-5,kshv-miR-K12-3
NM_002676	203467_at	TR(1..1295)CDS(63..851)	5372	PMM1	Homo sapiens phosphomannomutase 1 (PMM1), mRNA.	-0.632114867427487	7.35893504608423	0.0217279710874291	TRUE	kshv-miR-K12-6-5p
NM_022572	225298_at,233177_s_at	TR(1..2986)CDS(74..1159)	25953	PNKD	Homo sapiens paroxysmal nonkinesigenic dyskinesia (PNKD), transcript variant 2, mRNA.	-0.945369726708417	7.18047685613833	0.00140420947995980	TRUE	kshv-miR-K12-8,kshv-miR-K12-6-5p,kshv-miR-K12-4-3p,kshv-miR-K12-9*,kshv-miR-K12-7,kshv-miR-K12-4-5p
NM_007257	209597_s_at,209598_at	TR(1..4846)CDS(771..1865)	10687	PNMA2	Homo sapiens paraneoplastic antigen MA2 (PNMA2), mRNA.	-1.0200363389891	5.14647235388975	0.00230451387504768	TRUE	kshv-miR-K12-6-3p,kshv-miR-K12-3,kshv-miR-K12-9*
NM_015100	212153_at	TR(1..6618)CDS(307..4539)	23126	POGZ	Homo sapiens pogo transposable element with ZNF domain (POGZ), transcript variant 1, mRNA.	-0.57787115094828	8.82157655180653	0.0171940727479026	TRUE	kshv-miR-K12-1,kshv-miR-K12-3,kshv-miR-K12-9*
NM_013284	222238_s_at	TR(1..2651)CDS(93..1577)	27434	POLM	Homo sapiens polymerase (DNA directed), mu (POLM), mRNA.	-1.12661803161537	5.24790733901502	0.0295062094203546	TRUE	kshv-miR-K12-9*
NM_152705	224874_at,224857_s_at,218258_at	TR(1..1977)CDS(119..487)	51082	POLR1D	Homo sapiens polymerase (RNA) I polypeptide D, 16kDa (POLR1D), transcript variant 2, mRNA.	-0.578341805107505	10.4900802804653	0.0121658762797845	TRUE	kshv-miR-K12-6-5p
NM_022490	218997_at	TR(1..1854)CDS(101..1360)	64425	POLR1E	Homo sapiens polymerase (RNA) I polypeptide E, 53kDa (POLR1E), mRNA.	-1.28495927524621	8.63357670376022	1.22090323839370e-05	TRUE	kshv-miR-K12-1,kshv-miR-K12-4-5p
NM_000941	208928_at	TR(1..2509)CDS(83..2125)	5447	POR	Homo sapiens P450 (cytochrome) oxidoreductase (POR), mRNA.	-1.32623427143765	6.45978124682971	0.000190184453643488	TRUE	kshv-miR-K12-5,kshv-miR-K12-1,kshv-miR-K12-6-5p,kshv-miR-K12-9*
NM_001042594	204353_s_at,204354_at	TR(1..3964)CDS(864..2375)	25913	POT1	Homo sapiens POT1 protection of telomeres 1 homolog (S. pombe) (POT1), transcript variant 4, mRNA.	-0.591167388111429	8.4099785259984	0.0425273077191255	TRUE	kshv-miR-K12-2,kshv-miR-K12-6-5p,kshv-miR-K12-4-5p
NM_002698	229750_at,211771_s_at,228343_at	TR(1..4513)CDS(68..1459)	5452	POU2F2	Homo sapiens POU class 2 homeobox 2 (POU2F2), mRNA.	-0.522270292612935	4.76976544871292	0.0472888716540351	TRUE	kshv-miR-K12-3,kshv-miR-K12-3*,kshv-miR-K12-7,kshv-miR-K12-4-5p,kshv-miR-K12-9
NM_021823	219066_at	TR(1..2268)CDS(114..728)	60490	PPCDC	Homo sapiens phosphopantothenoylcysteine decarboxylase (PPCDC), mRNA.	-0.697885700407178	6.41485710692368	0.0368117691612944	TRUE	kshv-miR-K12-9
NM_003626	202066_at,210236_at,202065_s_at,210235_s_at	TR(1..5227)CDS(199..3807)	8500	PPFIA1	Homo sapiens protein tyrosine phosphatase, receptor type, f polypeptide (PTPRF), interacting protein (liprin), alpha 1 (PPFIA1), transcript variant 2, mRNA.	-0.909552655588406	6.7661095667657	0.0201713086398176	TRUE	kshv-miR-K12-9*
NM_002707	200913_at	TR(1..2165)CDS(108..1748)	5496	PPM1G	Homo sapiens protein phosphatase 1G (formerly 2C), magnesium-dependent, gamma isoform (PPM1G), transcript variant 2, mRNA.	-0.86164772763735	9.60825755334127	0.000251496090137079	TRUE	kshv-miR-K12-9*
NM_002481	201958_s_at,201957_at	TR(1..11102)CDS(145..3093)	4660	PPP1R12B	Homo sapiens protein phosphatase 1, regulatory (inhibitor) subunit 12B (PPP1R12B), transcript variant 1, mRNA.	-0.524610494241531	3.46675987461656	0.00631725203826472	FALSE	kshv-miR-K12-5,kshv-miR-K12-2,kshv-miR-K12-1,kshv-miR-K12-11,kshv-miR-K12-6-5p,kshv-miR-K12-4-3p,kshv-miR-K12-7,kshv-miR-K12-4-5p
NM_015568	41577_at,212750_at	TR(1..6251)CDS(190..1893)	26051	PPP1R16B	Homo sapiens protein phosphatase 1, regulatory (inhibitor) subunit 16B (PPP1R16B), mRNA.	-0.768754028513516	8.53182596142964	0.00152583086798522	TRUE	kshv-miR-K12-6-3p,kshv-miR-K12-1,kshv-miR-K12-6-5p,kshv-miR-K12-4-3p,kshv-miR-K12-9*,kshv-miR-K12-7,kshv-miR-K12-4-5p
NM_002715	208652_at	TR(1..2643)CDS(399..1328)	5515	PPP2CA	Homo sapiens protein phosphatase 2 (formerly 2A), catalytic subunit, alpha isoform (PPP2CA), mRNA.	-0.788749474720142	10.5820112690578	0.000262599060568991	TRUE	kshv-miR-K12-2,kshv-miR-K12-1,kshv-miR-K12-11
NM_178586	201877_s_at,1554364_at	TR(1..4050)CDS(109..1566)	5527	PPP2R5C	Homo sapiens protein phosphatase 2, regulatory subunit B', gamma isoform (PPP2R5C), transcript variant 2, mRNA.	-1.0409784042985	7.06404238276542	0.000724555297639363	TRUE	kshv-miR-K12-4-3p
NM_005605	207000_s_at,32541_at	TR(1..2221)CDS(328..1866)	5533	PPP3CC	Homo sapiens protein phosphatase 3 (formerly 2B), catalytic subunit, gamma isoform (PPP3CC), mRNA.	-0.707036193834861	8.86825553657991	0.0090978859194061	TRUE	kshv-miR-K12-1
NM_000945	204507_s_at,204506_at	TR(1..3111)CDS(393..905)	5534	PPP3R1	Homo sapiens protein phosphatase 3 (formerly 2B), regulatory subunit B, alpha isoform (PPP3R1), mRNA.	-1.10740961516482	5.42201787715733	6.32465679758382e-06	TRUE	kshv-miR-K12-7,kshv-miR-K12-4-5p
NM_058237	220672_at,220673_s_at,233002_at	TR(1..3868)CDS(155..2776)	57718	PPP4R4	Homo sapiens protein phosphatase 4, regulatory subunit 4 (PPP4R4), transcript variant 1, mRNA.	-0.851252031823308	3.29972950782115	0.0229308458265326	TRUE	kshv-miR-K12-3,kshv-miR-K12-4-5p
NM_002726	37950_at,204117_at	TR(1..2849)CDS(204..2336)	5550	PREP	Homo sapiens prolyl endopeptidase (PREP), mRNA.	-1.38755829069045	6.3149054008664	1.20928769425310e-05	TRUE	kshv-miR-K12-2,kshv-miR-K12-3,kshv-miR-K12-4-5p
NM_020820	224909_s_at,224925_at	TR(1..6633)CDS(24..5003)	57580	PREX1	Homo sapiens phosphatidylinositol-3,4,5-trisphosphate-dependent Rac exchange factor 1 (PREX1), mRNA.	-0.897370151547648	4.24545008935721	0.0223128099549659	FALSE	kshv-miR-K12-9*
NM_001079880	38269_at,209282_at	TR(1..3338)CDS(479..3115)	25865	PRKD2	Homo sapiens protein kinase D2 (PRKD2), transcript variant 2, mRNA.	-0.737572021177734	6.98922936927238	0.0189653209113234	TRUE	kshv-miR-K12-6-5p
NM_001081640	208694_at	TR(1..13416)CDS(58..12351)	5591	PRKDC	Homo sapiens protein kinase, DNA-activated, catalytic polypeptide (PRKDC), transcript variant 2, mRNA.	-0.668824083628421	10.6352554658903	0.00314103832938178	TRUE	kshv-miR-K12-2,kshv-miR-K12-11
NM_005044	204061_at	TR(1..6054)CDS(368..1444)	5613	PRKX	Homo sapiens protein kinase, X-linked (PRKX), mRNA.	-0.840021333696477	6.97431421342985	0.0245534205334737	TRUE	kshv-miR-K12-6-3p,kshv-miR-K12-1,kshv-miR-K12-11,kshv-miR-K12-3,kshv-miR-K12-9*,kshv-miR-K12-4-5p
NM_018061	218040_at	TR(1..3711)CDS(283..1923)	55119	PRPF38B	Homo sapiens PRP38 pre-mRNA processing factor 38 (yeast) domain containing B (PRPF38B), mRNA.	-1.10363010074032	8.37180486232311	0.00149676002725027	TRUE	kshv-miR-K12-6-3p,kshv-miR-K12-4-3p,kshv-miR-K12-4-5p
NM_173175	203110_at,203111_s_at	TR(1..3936)CDS(156..3059)	2185	PTK2B	Homo sapiens PTK2B protein tyrosine kinase 2 beta (PTK2B), transcript variant 4, mRNA.	-0.645347204421769	5.11710638388825	0.015946860956778	TRUE	kshv-miR-K12-3,kshv-miR-K12-6-5p,kshv-miR-K12-9*
NM_002843	227396_at,210173_at	TR(1..7854)CDS(356..4369)	5795	PTPRJ	Homo sapiens protein tyrosine phosphatase, receptor type, J (PTPRJ), transcript variant 1, mRNA.	-0.745407542578866	4.69516040691698	0.00612258153095042	TRUE	kshv-miR-K12-5,kshv-miR-K12-2,kshv-miR-K12-1,kshv-miR-K12-11,kshv-miR-K12-3,kshv-miR-K12-6-5p,kshv-miR-K12-9*
NM_004663	200863_s_at,200864_s_at	TR(1..2393)CDS(129..779)	8766	RAB11A	Homo sapiens RAB11A, member RAS oncogene family (RAB11A), mRNA.	-0.687253519149171	9.37900887388055	0.00335637230982097	TRUE	kshv-miR-K12-4-3p,kshv-miR-K12-9*
NM_032932	225739_at,225746_at,224482_s_at	TR(1..8665)CDS(230..2143)	84440	RAB11FIP4	Homo sapiens RAB11 family interacting protein 4 (class II) (RAB11FIP4), mRNA.	-0.950739163470068	3.96026494434996	0.00258370980967439	TRUE	kshv-miR-K12-5,kshv-miR-K12-1,kshv-miR-K12-6-5p,kshv-miR-K12-9*
NM_031296	221014_s_at	TR(1..3876)CDS(390..1079)	83452	RAB33B	Homo sapiens RAB33B, member RAS oncogene family (RAB33B), mRNA.	-1.31660177202511	6.93651305143221	0.00158232049806580	TRUE	kshv-miR-K12-2,kshv-miR-K12-9*
NM_022337	219412_at	TR(1..1412)CDS(48..683)	23682	RAB38	Homo sapiens RAB38, member RAS oncogene family (RAB38), mRNA.	-0.531321875522471	2.40608308690742	0.0486983751848792	FALSE	kshv-miR-K12-6-3p
NM_012233	212932_at,213530_at,213531_s_at	TR(1..4179)CDS(26..2971)	22930	RAB3GAP1	Homo sapiens RAB3 GTPase activating protein subunit 1 (catalytic) (RAB3GAP1), mRNA.	-0.586350955471425	7.90203196400967	0.0095092846924934	TRUE	kshv-miR-K12-11,kshv-miR-K12-4-3p
NM_004637	211960_s_at,211961_s_at	TR(1..2240)CDS(233..856)	7879	RAB7A	Homo sapiens RAB7A, member RAS oncogene family (RAB7A), mRNA.	-0.947971267072367	8.97046253747229	0.000174325542462519	TRUE	kshv-miR-K12-2,kshv-miR-K12-1,kshv-miR-K12-4-3p
NM_003929	218699_at,243777_at,218700_s_at	TR(1..3324)CDS(341..952)	8934	RAB7L1	Homo sapiens RAB7, member RAS oncogene family-like 1 (RAB7L1), transcript variant 1, mRNA.	-1.04268740687107	3.88289048147346	0.00167098470599311	TRUE	kshv-miR-K12-1,kshv-miR-K12-3,kshv-miR-K12-9*,kshv-miR-K12-9
NM_005370	208819_at	TR(1..2194)CDS(223..846)	4218	RAB8A	Homo sapiens RAB8A, member RAS oncogene family (RAB8A), mRNA.	-1.18820990064939	8.41993930725714	0.00721142625661367	TRUE	kshv-miR-K12-1,kshv-miR-K12-6-5p
NM_016530	219210_s_at,222846_at,226633_at	TR(1..4877)CDS(97..720)	51762	RAB8B	Homo sapiens RAB8B, member RAS oncogene family (RAB8B), mRNA.	-0.953126419447471	6.70102476863535	0.000495434521577333	TRUE	kshv-miR-K12-6-3p,kshv-miR-K12-1,kshv-miR-K12-3,kshv-miR-K12-6-5p,kshv-miR-K12-4-3p,kshv-miR-K12-9*,kshv-miR-K12-4-5p
NM_001035230	213982_s_at	TR(1..787)CDS(272..490)	9910	RABGAP1L	Homo sapiens RAB GTPase activating protein 1-like (RABGAP1L), transcript variant 2, mRNA.	-0.939394240562527	10.0183682245056	0.000160979309923043	TRUE	kshv-miR-K12-4-5p
NM_004582	213704_at,209180_at,209181_s_at	TR(1..1526)CDS(72..1067)	5876	RABGGTB	Homo sapiens Rab geranylgeranyltransferase, beta subunit (RABGGTB), mRNA.	-0.844126884152293	9.95077124367079	0.00543692690502691	TRUE	kshv-miR-K12-2
NM_134424	205647_at,210630_s_at	TR(1..2673)CDS(115..1371)	5893	RAD52	Homo sapiens RAD52 homolog (S. cerevisiae) (RAD52), mRNA.	-0.925504015661887	4.45197132847707	0.0279058216654840	TRUE	kshv-miR-K12-6-5p
NM_002880	201244_s_at	TR(1..3291)CDS(416..2362)	5894	RAF1	Homo sapiens v-raf-1 murine leukemia viral oncogene homolog 1 (RAF1), mRNA.	-0.800160893260214	9.28718813330052	0.000444152091061882	TRUE	kshv-miR-K12-6-5p
NM_021183	218669_at,218668_s_at	TR(1..3933)CDS(785..1336)	57826	RAP2C	Homo sapiens RAP2C, member of RAS oncogene family (RAP2C), mRNA.	-0.627457175178672	8.58246377899059	0.00391971403301058	TRUE	kshv-miR-K12-5,kshv-miR-K12-4-5p
NM_000964	1565358_at,203750_s_at,211605_s_at,203749_s_at	TR(1..3260)CDS(456..1844)	5914	RARA	Homo sapiens retinoic acid receptor, alpha (RARA), transcript variant 1, mRNA.	-0.641913996661282	3.9927982901378	0.00360191629914692	TRUE	kshv-miR-K12-9*
NM_005057	205169_at	TR(1..3683)CDS(131..1747)	5929	RBBP5	Homo sapiens retinoblastoma binding protein 5 (RBBP5), mRNA.	-0.8631573905837	5.73080567910321	0.013859174912504	TRUE	kshv-miR-K12-6-3p,kshv-miR-K12-1,kshv-miR-K12-9*
NM_022768	1555760_a_at,1555762_s_at	TR(1..3450)CDS(84..3017)	64783	RBM15	Homo sapiens RNA binding motif protein 15 (RBM15), mRNA.	-0.683321191637967	9.17500670779454	0.0307279186249652	TRUE	kshv-miR-K12-4-3p
NM_021239	212027_at,212031_at,212028_at,212030_at,212033_at	TR(1..4189)CDS(162..2693)	58517	RBM25	Homo sapiens RNA binding motif protein 25 (RBM25), mRNA.	-0.755959423750828	8.4291720564578	0.0260972665790647	TRUE	kshv-miR-K12-3,kshv-miR-K12-6-5p,kshv-miR-K12-4-3p
NM_022118	218422_s_at,222626_at	TR(1..3624)CDS(15..2957)	64062	RBM26	Homo sapiens RNA binding motif protein 26 (RBM26), mRNA.	-0.493613750711205	6.59579225281869	0.0232245253611104	TRUE	kshv-miR-K12-3
NM_018077	218593_at	TR(1..2823)CDS(116..2395)	55131	RBM28	Homo sapiens RNA binding motif protein 28 (RBM28), mRNA.	-0.661329929113676	8.970395757503	0.00363919601744482	TRUE	kshv-miR-K12-9*
NM_006743	208319_s_at	TR(1..1588)CDS(140..613)	5935	RBM3	Homo sapiens RNA binding motif (RNP1, RRM) protein 3 (RBM3), mRNA.	-0.690821830459638	10.9426008846110	0.0271675725777744	TRUE	kshv-miR-K12-1
NM_172071	228996_at,225893_at	TR(1..10996)CDS(88..3489)	149041	RC3H1	Homo sapiens ring finger and CCCH-type zinc finger domains 1 (RC3H1), mRNA.	-0.771533673525715	6.0377674426779	0.0331564756232715	TRUE	kshv-miR-K12-2,kshv-miR-K12-4-3p,kshv-miR-K12-9,kshv-miR-K12-11,kshv-miR-K12-1,kshv-miR-K12-5,kshv-miR-K12-6-5p,kshv-miR-K12-9*
NM_015156	212612_at	TR(1..5537)CDS(1..1449)	23186	RCOR1	Homo sapiens REST corepressor 1 (RCOR1), mRNA.	-0.849386873694675	8.60811160278698	0.000317498010501149	TRUE	kshv-miR-K12-5,kshv-miR-K12-11,kshv-miR-K12-3,kshv-miR-K12-3*,kshv-miR-K12-6-5p,kshv-miR-K12-4-3p
NM_052862	225763_at	TR(1..3156)CDS(332..1582)	92241	RCSD1	Homo sapiens RCSD domain containing 1 (RCSD1), mRNA.	-0.530121462759674	10.3541639800953	0.0141225924862052	TRUE	kshv-miR-K12-5,kshv-miR-K12-1,kshv-miR-K12-3,kshv-miR-K12-6-5p
NM_003835	206518_s_at	TR(1..2447)CDS(111..2135)	8787	RGS9	Homo sapiens regulator of G-protein signaling 9 (RGS9), transcript variant 1, mRNA.	-0.821431992621963	3.58553812127892	0.0101102334736427	TRUE	kshv-miR-K12-9*
NM_152756	226312_at,226310_at,228248_at	TR(1..9535)CDS(25..5151)	253260	RICTOR	Homo sapiens rapamycin-insensitive companion of mTOR (RICTOR), mRNA.	-0.71575393833213	7.8194075381601	0.0152046159194367	TRUE	kshv-miR-K12-2,kshv-miR-K12-3,kshv-miR-K12-6-3p,kshv-miR-K12-11,kshv-miR-K12-1,kshv-miR-K12-5,kshv-miR-K12-6-5p,kshv-miR-K12-4-5p
NM_014868	207801_s_at,208632_at	TR(1..3864)CDS(484..2919)	9921	RNF10	Homo sapiens ring finger protein 10 (RNF10), mRNA.	-0.671908220718876	7.39880572433495	0.026572396556223	TRUE	kshv-miR-K12-3,kshv-miR-K12-6-5p
NM_014455	212742_at	TR(1..1675)CDS(205..1119)	27246	RNF115	Homo sapiens ring finger protein 115 (RNF115), mRNA.	-0.886086994889133	7.43838880105805	2.2842852331705e-05	TRUE	kshv-miR-K12-1,kshv-miR-K12-6-5p
NM_022064	224186_s_at	TR(1..4272)CDS(87..4031)	63891	RNF123	Homo sapiens ring finger protein 123 (RNF123), mRNA.	-0.733367509202256	5.50840265634738	0.0110926524897886	TRUE	kshv-miR-K12-11
NM_178841	227726_at	TR(1..1895)CDS(75..788)	115992	RNF166	Homo sapiens ring finger protein 166 (RNF166), mRNA.	-1.23719695895843	6.1372317044671	1.76177765323209e-05	TRUE	kshv-miR-K12-11,kshv-miR-K12-6-5p,kshv-miR-K12-9*
NM_194332	218528_s_at,222660_s_at	TR(1..5118)CDS(458..1756)	152006	RNF38	Homo sapiens ring finger protein 38 (RNF38), transcript variant 6, mRNA.	-0.864636132955665	5.27414678770233	0.0146251639626518	TRUE	kshv-miR-K12-3,kshv-miR-K12-4-5p
NM_017763	218704_at	TR(1..4573)CDS(940..3291)	54894	RNF43	Homo sapiens ring finger protein 43 (RNF43), mRNA.	-0.811276948800367	2.65848941555611	0.0345728353789409	FALSE	kshv-miR-K12-3,kshv-miR-K12-6-5p
NM_183237	218286_s_at	TR(1..1609)CDS(134..406)	9616	RNF7	Homo sapiens ring finger protein 7 (RNF7), transcript variant 3, mRNA.	-0.540733454554577	8.95394712242591	0.00301440217333914	TRUE	kshv-miR-K12-2,kshv-miR-K12-9*,kshv-miR-K12-4-5p
NM_019593	224835_at	TR(1..5478)CDS(214..2232)	56261	RP5-1022P6.2	Homo sapiens hypothetical protein KIAA1434 (RP5-1022P6.2), mRNA.	-0.750774693479069	5.85936234134068	0.00584546054208106	TRUE	kshv-miR-K12-2,kshv-miR-K12-1,kshv-miR-K12-3,kshv-miR-K12-6-5p,kshv-miR-K12-4-3p,kshv-miR-K12-9*,kshv-miR-K12-4-5p
NM_002950	201011_at	TR(1..2372)CDS(77..1900)	6184	RPN1	Homo sapiens ribophorin I (RPN1), mRNA.	-0.802476142075832	9.13800225734582	0.00657914172992761	TRUE	kshv-miR-K12-5,kshv-miR-K12-1,kshv-miR-K12-4-3p
NM_002953	203379_at	TR(1..3199)CDS(164..2371)	6195	RPS6KA1	Homo sapiens ribosomal protein S6 kinase, 90kDa, polypeptide 1 (RPS6KA1), transcript variant 1, mRNA.	-0.606772415468504	7.89654350609901	0.0360482129262853	TRUE	kshv-miR-K12-9*,kshv-miR-K12-7,kshv-miR-K12-4-5p
NM_018346	218307_at	TR(1..2499)CDS(57..1385)	55316	RSAD1	Homo sapiens radical S-adenosyl methionine domain containing 1 (RSAD1), mRNA.	-1.17742227299802	7.50846472023563	0.0124185291452067	TRUE	kshv-miR-K12-6-5p,kshv-miR-K12-9*
NM_018364	222791_at,213694_at,222788_s_at,222790_s_at,222789_at	TR(1..6604)CDS(37..2445)	54665	RSBN1	Homo sapiens round spermatid basic protein 1 (RSBN1), mRNA.	-0.612637695579301	7.00033668665384	0.0275275090159398	TRUE	kshv-miR-K12-6-3p,kshv-miR-K12-5,kshv-miR-K12-2,kshv-miR-K12-1,kshv-miR-K12-3,kshv-miR-K12-4-3p,kshv-miR-K12-4-5p
NM_145307	230469_at	TR(1..6659)CDS(98..1927)	219790	RTKN2	Homo sapiens rhotekin 2 (RTKN2), mRNA.	-1.69718704965925	5.34034169766194	0.0103866848882553	TRUE	kshv-miR-K12-11,kshv-miR-K12-4-3p,kshv-miR-K12-7
NM_004349	205529_s_at,216831_s_at,205528_s_at	TR(1..3463)CDS(412..2145)	862	RUNX1T1	Homo sapiens runt-related transcription factor 1; translocated to, 1 (cyclin D-related) (RUNX1T1), transcript variant 1, mRNA.	-0.65346617128529	2.88384578028536	0.0365029132322658	TRUE	kshv-miR-K12-3,kshv-miR-K12-9*
NM_004350	204197_s_at,204198_s_at	TR(1..4270)CDS(412..1659)	864	RUNX3	Homo sapiens runt-related transcription factor 3 (RUNX3), transcript variant 2, mRNA.	-0.62011542940091	8.65756916529496	0.0100390812789094	TRUE	kshv-miR-K12-6-3p,kshv-miR-K12-2,kshv-miR-K12-1,kshv-miR-K12-6-5p,kshv-miR-K12-9*,kshv-miR-K12-7
NM_130772	1554876_a_at	TR(1..1164)CDS(331..630)	170591	S100Z	Homo sapiens S100 calcium binding protein Z (S100Z), mRNA.	-0.675161200329925	4.54628409889287	0.0487800673177443	TRUE	kshv-miR-K12-5,kshv-miR-K12-3
NM_014016	202797_at	TR(1..3707)CDS(205..1968)	22908	SACM1L	Homo sapiens SAC1 suppressor of actin mutations 1-like (yeast) (SACM1L), mRNA.	-0.491784190016356	9.45076187560524	0.0329188093548912	TRUE	kshv-miR-K12-1,kshv-miR-K12-11,kshv-miR-K12-3,kshv-miR-K12-6-5p,kshv-miR-K12-4-3p
NM_014649	203280_at,32099_at	TR(1..3334)CDS(213..3074)	9667	SAFB2	Homo sapiens scaffold attachment factor B2 (SAFB2), mRNA.	-0.559438967325503	6.43789969285337	0.0020633418577302	TRUE	kshv-miR-K12-3
NM_022136	1555638_a_at,220330_s_at	TR(1..1893)CDS(83..1204)	64092	SAMSN1	Homo sapiens SAM domain, SH3 domain and nuclear localization signals 1 (SAMSN1), mRNA.	-1.72509353629419	4.35649977293155	0.015848261680208	TRUE	kshv-miR-K12-2
NM_016106	215548_s_at	TR(1..2172)CDS(25..1953)	23256	SCFD1	Homo sapiens sec1 family domain containing 1 (SCFD1), transcript variant 1, mRNA.	-0.890281529223216	9.75481671113343	0.0208268777734361	TRUE	kshv-miR-K12-3
NM_144643	236487_at	TR(1..3053)CDS(507..2573)	132320	SCLT1	Homo sapiens sodium channel and clathrin linker 1 (SCLT1), mRNA.	-0.542159921520984	7.64718763100148	0.00100458273559877	TRUE	kshv-miR-K12-1
NM_006323	202798_at	TR(1..4649)CDS(56..3862)	10427	SEC24B	Homo sapiens SEC24 family, member B (S. cerevisiae) (SEC24B), transcript variant 1, mRNA.	-0.524412052752851	9.62244090373295	0.0494659583915924	TRUE	kshv-miR-K12-1
NM_014822	202375_at	TR(1..4077)CDS(273..3371)	9871	SEC24D	Homo sapiens SEC24 family, member D (S. cerevisiae) (SEC24D), mRNA.	-1.33554127380493	7.7268401342369	0.000612129031567529	TRUE	kshv-miR-K12-1
NM_018144	219499_at	TR(1..1892)CDS(89..1519)	55176	SEC61A2	Homo sapiens Sec61 alpha 2 subunit (S. cerevisiae) (SEC61A2), mRNA.	-0.545286926335996	4.00491751002495	0.0498764450101392	TRUE	kshv-miR-K12-1,kshv-miR-K12-11
NM_001077203	220735_s_at,223444_at	TR(1..4739)CDS(112..3069)	57337	SENP7	Homo sapiens SUMO1/sentrin specific peptidase 7 (SENP7), transcript variant 2, mRNA.	-0.65755298496046	2.73038428213455	0.0166716479826663	TRUE	kshv-miR-K12-4-3p,kshv-miR-K12-7
NM_014445	200971_s_at,200970_s_at,200969_at	TR(1..3181)CDS(507..707)	27230	SERP1	Homo sapiens stress-associated endoplasmic reticulum protein 1 (SERP1), mRNA.	-0.532984191444304	10.7559067706108	0.00155878540583783	TRUE	kshv-miR-K12-5,kshv-miR-K12-2,kshv-miR-K12-1,kshv-miR-K12-4-5p
NM_004155	209722_s_at,209723_at	TR(1..4121)CDS(84..1214)	5272	SERPINB9	Homo sapiens serpin peptidase inhibitor, clade B (ovalbumin), member 9 (SERPINB9), mRNA.	-0.732259822417269	6.82293656429879	6.00748375269138e-05	TRUE	kshv-miR-K12-9*,kshv-miR-K12-7,kshv-miR-K12-4-5p
NM_203344	219382_at	TR(1..1416)CDS(168..758)	29946	SERTAD3	Homo sapiens SERTA domain containing 3 (SERTAD3), transcript variant 2, mRNA.	-0.840843861557242	6.36773158772917	0.0257554669968616	TRUE	kshv-miR-K12-9*
NM_001017392	64371_at,212000_at,213505_s_at	TR(1..4715)CDS(75..3323)	10147	SFRS14	Homo sapiens splicing factor, arginine/serine-rich 14 (SFRS14), transcript variant 1, mRNA.	-1.29752789240224	6.32777490595758	0.0114565695499204	TRUE	kshv-miR-K12-2,kshv-miR-K12-1,kshv-miR-K12-3,kshv-miR-K12-4-5p
NM_005627	201739_at	TR(1..2414)CDS(90..1385)	6446	SGK1	Homo sapiens serum/glucocorticoid regulated kinase 1 (SGK1), mRNA.	-1.80220067179682	6.14000335394556	0.0130662566438968	TRUE	kshv-miR-K12-1,kshv-miR-K12-3
NM_030791	221268_s_at,223391_at	TR(1..3323)CDS(95..1420)	81537	SGPP1	Homo sapiens sphingosine-1-phosphate phosphatase 1 (SGPP1), mRNA.	-0.704764152632577	9.95354279323165	0.0229022631792915	TRUE	kshv-miR-K12-3,kshv-miR-K12-4-5p,kshv-miR-K12-9
NM_005475	203320_at	TR(1..5423)CDS(358..2085)	10019	SH2B3	Homo sapiens SH2B adaptor protein 3 (SH2B3), mRNA.	-1.55854839808242	7.758600755451	1.42926574847965e-05	TRUE	kshv-miR-K12-5,kshv-miR-K12-9*,kshv-miR-K12-7
NM_005490	219513_s_at	TR(1..2376)CDS(195..1925)	10045	SH2D3A	Homo sapiens SH2 domain containing 3A (SH2D3A), mRNA.	-0.505285793952267	3.85869899934628	0.00503146309552365	TRUE	kshv-miR-K12-8,kshv-miR-K12-1,kshv-miR-K12-3
NM_170600	226673_at,1552667_a_at	TR(1..3114)CDS(18..2600)	10044	SH2D3C	Homo sapiens SH2 domain containing 3C (SH2D3C), transcript variant 2, mRNA.	-1.10306882528381	5.58145447231328	0.0280840635731377	TRUE	kshv-miR-K12-1
NM_024745	219493_at	TR(1..3249)CDS(41..2059)	79801	SHCBP1	Homo sapiens SHC SH2-domain binding protein 1 (SHCBP1), mRNA.	-0.77955935107722	9.64419489250646	0.0261946140194872	TRUE	kshv-miR-K12-2,kshv-miR-K12-4-3p,kshv-miR-K12-4-5p
NM_005415	201920_at	TR(1..3297)CDS(447..2486)	6574	SLC20A1	Homo sapiens solute carrier family 20 (phosphate transporter), member 1 (SLC20A1), mRNA.	-0.577631209178028	10.3048981003278	0.021075884509805	TRUE	kshv-miR-K12-2,kshv-miR-K12-3,kshv-miR-K12-6-5p
NM_018420	228497_at	TR(1..4729)CDS(131..1774)	55356	SLC22A15	Homo sapiens solute carrier family 22, member 15 (SLC22A15), mRNA.	-1.49713396674364	3.58131773947763	1.54195229894408e-05	TRUE	kshv-miR-K12-3,kshv-miR-K12-6-5p
NM_001006643	225212_at	TR(1..3264)CDS(363..1463)	114789	SLC25A25	Homo sapiens solute carrier family 25 (mitochondrial carrier; phosphate carrier), member 25 (SLC25A25), nuclear gene encoding mitochondrial protein, transcript variant 4, mRNA.	-1.02793200838134	6.94933315691741	0.00168082065843922	TRUE	kshv-miR-K12-3,kshv-miR-K12-6-5p
NM_004277	1552774_a_at,1554161_at,231787_at,230624_at	TR(1..2959)CDS(252..1223)	9481	SLC25A27	Homo sapiens solute carrier family 25, member 27 (SLC25A27), nuclear gene encoding mitochondrial protein, mRNA.	-1.81666259576279	4.14726617903537	8.1436451666742e-05	TRUE	kshv-miR-K12-1,kshv-miR-K12-3,kshv-miR-K12-4-3p,kshv-miR-K12-4-5p
NM_017875	217961_at	TR(1..2124)CDS(402..1316)	54977	SLC25A38	Homo sapiens solute carrier family 25, member 38 (SLC25A38), mRNA.	-0.917898383524314	8.87829475261435	0.00393825261204752	TRUE	kshv-miR-K12-6-5p
NM_016016	223649_s_at	TR(1..1556)CDS(118..1173)	51629	SLC25A39	Homo sapiens solute carrier family 25, member 39 (SLC25A39), mRNA.	-0.777630643170346	8.41697094734664	0.0144259926172548	TRUE	kshv-miR-K12-9*,kshv-miR-K12-7
NM_178526	228921_at,226737_at	TR(1..3160)CDS(152..1108)	284439	SLC25A42	Homo sapiens solute carrier family 25, member 42 (SLC25A42), mRNA.	-0.534680021161014	4.51493805339193	0.0472924472658455	TRUE	kshv-miR-K12-5,kshv-miR-K12-3,kshv-miR-K12-6-5p,kshv-miR-K12-4-3p,kshv-miR-K12-9*
NM_145305	1557411_s_at	TR(1..2788)CDS(345..1370)	203427	SLC25A43	Homo sapiens solute carrier family 25, member 43 (SLC25A43), mRNA.	-0.489144754331806	8.23300551789822	0.000840291039487408	TRUE	kshv-miR-K12-11
NM_004733	1554148_a_at	TR(1..2659)CDS(382..2031)	9197	SLC33A1	Homo sapiens solute carrier family 33 (acetyl-CoA transporter), member 1 (SLC33A1), mRNA.	-1.23651515491181	6.29289076543822	0.00329472195244767	TRUE	kshv-miR-K12-11,kshv-miR-K12-6-5p
NM_173073	225037_at,219447_s_at	TR(1..2203)CDS(313..1347)	51006	SLC35C2	Homo sapiens solute carrier family 35, member C2 (SLC35C2), transcript variant 3, mRNA.	-0.492014979262065	6.88056363659945	0.0336990150695847	TRUE	kshv-miR-K12-9*
NM_207113	223304_at	TR(1..3335)CDS(167..1651)	84255	SLC37A3	Homo sapiens solute carrier family 37 (glycerol-3-phosphate transporter), member 3 (SLC37A3), transcript variant 1, mRNA.	-0.672297917015012	4.23742834412037	7.18184951040037e-05	TRUE	kshv-miR-K12-3,kshv-miR-K12-4-5p
NM_020428	225175_s_at,224609_at	TR(1..3389)CDS(82..2202)	57153	SLC44A2	Homo sapiens solute carrier family 44, member 2 (SLC44A2), mRNA.	-0.781030920426867	6.14762997248365	0.0183996290652173	TRUE	kshv-miR-K12-11,kshv-miR-K12-6-5p,kshv-miR-K12-9*
NM_017842	218416_s_at,218417_s_at,48106_at	TR(1..3034)CDS(122..562)	55652	SLC48A1	Homo sapiens solute carrier family 48 (heme transporter), member 1 (SLC48A1), mRNA.	-0.954127422170271	3.50497614054702	0.000295757494498842	TRUE	kshv-miR-K12-1,kshv-miR-K12-3,kshv-miR-K12-9*,kshv-miR-K12-4-5p
NM_006933	1553313_s_at,213164_at,212944_at,213167_s_at	TR(1..11579)CDS(513..2669)	6526	SLC5A3	Homo sapiens solute carrier family 5 (sodium/myo-inositol cotransporter), member 3 (SLC5A3), mRNA.	-0.825140228431969	4.99069907228661	0.00297121557508265	TRUE	kshv-miR-K12-2,kshv-miR-K12-3,kshv-miR-K12-4-3p,kshv-miR-K12-11,kshv-miR-K12-1,kshv-miR-K12-5,kshv-miR-K12-6-5p,kshv-miR-K12-9*,kshv-miR-K12-7
NM_004252	201349_at	TR(1..1997)CDS(210..1286)	9368	SLC9A3R1	Homo sapiens solute carrier family 9 (sodium/hydrogen exchanger), member 3 regulator 1 (SLC9A3R1), mRNA.	-0.618180081528518	8.45441848953924	0.0404806200475116	TRUE	kshv-miR-K12-5,kshv-miR-K12-3
NM_006359	203909_at	TR(1..4646)CDS(77..2086)	10479	SLC9A6	Homo sapiens solute carrier family 9 (sodium/hydrogen exchanger), member 6 (SLC9A6), transcript variant 2, mRNA.	-0.932081174706688	7.47785666815723	0.00218292543484017	TRUE	kshv-miR-K12-6-3p,kshv-miR-K12-2,kshv-miR-K12-3,kshv-miR-K12-6-5p,kshv-miR-K12-4-3p,kshv-miR-K12-4-5p
NM_001001420	235451_at,225219_at,205188_s_at,205187_at,225223_at	TR(1..6937)CDS(286..1683)	4090	SMAD5	Homo sapiens SMAD family member 5 (SMAD5), transcript variant 3, mRNA.	-0.692604499620565	6.63436372100704	0.00127834946206694	TRUE	kshv-miR-K12-2,kshv-miR-K12-1,kshv-miR-K12-11,kshv-miR-K12-3,kshv-miR-K12-4-3p,kshv-miR-K12-9*,kshv-miR-K12-4-5p
NM_001044305	218137_s_at	TR(1..3344)CDS(249..1652)	60682	SMAP1	Homo sapiens small ArfGAP 1 (SMAP1), transcript variant 1, mRNA.	-1.63195775784995	7.8732714210569	0.000295774551588931	TRUE	kshv-miR-K12-6-3p,kshv-miR-K12-6-5p,kshv-miR-K12-9*,kshv-miR-K12-7,kshv-miR-K12-4-5p
NM_001130420	201320_at,201321_s_at	TR(1..5402)CDS(107..3565)	6601	SMARCC2	Homo sapiens SWI/SNF related, matrix associated, actin dependent regulator of chromatin, subfamily c, member 2 (SMARCC2), transcript variant 3, mRNA.	-0.878407570322285	7.56595064328024	0.000255846919068788	TRUE	kshv-miR-K12-1,kshv-miR-K12-6-5p,kshv-miR-K12-9*
NM_015092	210057_at,224842_at	TR(1..15739)CDS(24..11009)	23049	SMG1	Homo sapiens PI-3-kinase-related kinase SMG-1 (SMG1), mRNA.	-0.758361753592975	6.96372071710712	0.0131964018153023	TRUE	kshv-miR-K12-2,kshv-miR-K12-1,kshv-miR-K12-11,kshv-miR-K12-3,kshv-miR-K12-4-3p,kshv-miR-K12-4-5p,kshv-miR-K12-9
NM_173156	201794_s_at,217189_s_at	TR(1..5846)CDS(123..3536)	9887	SMG7	Homo sapiens Smg-7 homolog, nonsense mediated mRNA decay factor (C. elegans) (SMG7), transcript variant 1, mRNA.	-0.643113156325821	5.51401888358307	0.0064404075682183	TRUE	kshv-miR-K12-6-5p,kshv-miR-K12-9
NM_022739	205596_s_at	TR(1..3866)CDS(389..2635)	64750	SMURF2	Homo sapiens SMAD specific E3 ubiquitin protein ligase 2 (SMURF2), mRNA.	-0.487528771519467	7.97229874947425	0.00296053146657848	TRUE	kshv-miR-K12-6-3p,kshv-miR-K12-5,kshv-miR-K12-2,kshv-miR-K12-11,kshv-miR-K12-4-3p
NM_173354	208078_s_at,232470_at	TR(1..4706)CDS(128..2479)	150094	SNF1LK	Homo sapiens SNF1-like kinase (SNF1LK), mRNA.	-0.575713370809152	3.6339463096692	2.46063349764712e-05	TRUE	kshv-miR-K12-5,kshv-miR-K12-6-5p,kshv-miR-K12-9*,kshv-miR-K12-4-5p
NM_004814	215905_s_at	TR(1..1638)CDS(47..1120)	9410	SNRNP40	Homo sapiens small nuclear ribonucleoprotein 40kDa (U5) (SNRNP40), mRNA.	-1.65475509825959	7.06512677972644	0.00302146836324524	TRUE	kshv-miR-K12-3
NM_152551	1553274_a_at,226263_at	TR(1..4173)CDS(60..1079)	154007	SNRNP48	Homo sapiens small nuclear ribonucleoprotein 48kDa (U11/U12) (SNRNP48), mRNA.	-1.56858583608409	7.7652558788194	4.24026631192004e-06	TRUE	kshv-miR-K12-2,kshv-miR-K12-6-5p,kshv-miR-K12-9*
NM_004175	202567_at	TR(1..1385)CDS(441..821)	6634	SNRPD3	Homo sapiens small nuclear ribonucleoprotein D3 polypeptide 18kDa (SNRPD3), mRNA.	-0.780330314898931	11.2689048026667	0.000204583775073479	TRUE	kshv-miR-K12-6-5p
NM_080867	226178_at,1552792_at	TR(1..6900)CDS(437..1759)	122809	SOCS4	Homo sapiens suppressor of cytokine signaling 4 (SOCS4), transcript variant 2, mRNA.	-0.486227756033407	6.21728519378856	0.0445499779489723	TRUE	kshv-miR-K12-6-3p,kshv-miR-K12-2,kshv-miR-K12-1,kshv-miR-K12-4-3p,kshv-miR-K12-9*,kshv-miR-K12-4-5p
NM_001024465	215223_s_at,216841_s_at	TR(1..1035)CDS(155..823)	6648	SOD2	Homo sapiens superoxide dismutase 2, mitochondrial (SOD2), nuclear gene encoding mitochondrial protein, transcript variant 2, mRNA.	-0.64328110572125	8.1062487182859	0.00870812676853025	TRUE	kshv-miR-K12-6-3p
NM_001080391	210218_s_at,202864_s_at,210985_s_at	TR(1..5455)CDS(142..2799)	6672	SP100	Homo sapiens SP100 nuclear antigen (SP100), transcript variant 1, mRNA.	-0.655943152279887	4.3988117219917	0.00655744959685926	TRUE	kshv-miR-K12-6-5p,kshv-miR-K12-9*,kshv-miR-K12-7,kshv-miR-K12-9
NM_145207	241546_at,229075_at,242251_at	TR(1..8152)CDS(74..2755)	166378	SPATA5	Homo sapiens spermatogenesis associated 5 (SPATA5), mRNA.	-0.893081078683018	5.28220427819336	0.00942596688544838	TRUE	kshv-miR-K12-5,kshv-miR-K12-1,kshv-miR-K12-3,kshv-miR-K12-6-5p,kshv-miR-K12-9*,kshv-miR-K12-4-5p
NM_015001	201996_s_at,1556059_s_at,201997_s_at,1556058_s_at	TR(1..12227)CDS(205..11199)	23013	SPEN	Homo sapiens spen homolog, transcriptional regulator (Drosophila) (SPEN), mRNA.	-0.865557216528991	6.48833326479412	0.000221975301700858	TRUE	kshv-miR-K12-6-5p
NM_001127889	217827_s_at	TR(1..1635)CDS(94..1020)	51324	SPG21	Homo sapiens spastic paraplegia 21 (autosomal recessive, Mast syndrome) (SPG21), transcript variant 2, mRNA.	-0.783913514603725	9.4887478297463	0.00279382837564549	TRUE	kshv-miR-K12-1
NM_003121	205861_at	TR(1..1467)CDS(5..793)	6689	SPIB	Homo sapiens Spi-B transcription factor (Spi-1/PU.1 related) (SPIB), mRNA.	-0.97838963704647	8.35125989613188	0.00141390598066515	TRUE	kshv-miR-K12-1,kshv-miR-K12-7
NM_001047	204675_at	TR(1..2285)CDS(191..970)	6715	SRD5A1	Homo sapiens steroid-5-alpha-reductase, alpha polypeptide 1 (3-oxo-5 alpha-steroid delta 4-dehydrogenase alpha 1) (SRD5A1), mRNA.	-0.493768676010108	7.29126944174635	0.018948391981218	TRUE	kshv-miR-K12-2,kshv-miR-K12-6-5p
NM_004176	202308_at	TR(1..4194)CDS(195..3638)	6720	SREBF1	Homo sapiens sterol regulatory element binding transcription factor 1 (SREBF1), transcript variant 2, mRNA.	-1.12571011917337	4.7284479886004	9.34182776462064e-05	TRUE	kshv-miR-K12-6-5p
NM_007107	222412_s_at,217790_s_at	TR(1..3067)CDS(58..615)	6747	SSR3	Homo sapiens signal sequence receptor, gamma (translocon-associated protein gamma) (SSR3), mRNA.	-1.0029237971661	7.47059927851384	0.00117538310509702	TRUE	kshv-miR-K12-6-3p,kshv-miR-K12-1,kshv-miR-K12-3,kshv-miR-K12-4-5p,kshv-miR-K12-9
NM_003146	200957_s_at,200956_s_at	TR(1..2825)CDS(268..2397)	6749	SSRP1	Homo sapiens structure specific recognition protein 1 (SSRP1), mRNA.	-0.68135727857034	10.1884375423395	0.000182846732995840	TRUE	kshv-miR-K12-6-5p
NM_006804	202991_at	TR(1..2073)CDS(125..1462)	10948	STARD3	Homo sapiens StAR-related lipid transfer (START) domain containing 3 (STARD3), mRNA.	-0.937704654600604	6.14643305575176	0.0110625871601193	TRUE	kshv-miR-K12-6-5p
NM_017452	211505_s_at	TR(1..3399)CDS(366..1856)	6780	STAU1	Homo sapiens staufen, RNA binding protein, homolog 1 (Drosophila) (STAU1), transcript variant T2, mRNA.	-0.86394969866465	9.05937959365299	0.00211618762221161	TRUE	kshv-miR-K12-6-3p,kshv-miR-K12-4-3p
NM_007269	203310_at	TR(1..2522)CDS(76..1854)	6814	STXBP3	Homo sapiens syntaxin binding protein 3 (STXBP3), mRNA.	-0.600599939391615	9.31922082752443	0.0234488020072085	TRUE	kshv-miR-K12-1,kshv-miR-K12-6-5p
NM_022491	224974_at,233841_s_at	TR(1..4728)CDS(140..1126)	64426	SUDS3	Homo sapiens suppressor of defective silencing 3 homolog (S. cerevisiae) (SUDS3), mRNA.	-0.862021057459208	7.79276045792236	0.000206800660801893	TRUE	kshv-miR-K12-5,kshv-miR-K12-2,kshv-miR-K12-4-3p
NM_015055	209307_at,209306_s_at	TR(1..4848)CDS(100..1857)	23075	SWAP70	Homo sapiens SWAP-70 protein (SWAP70), mRNA.	-0.880568815305002	11.2052680395518	0.00195316754167265	TRUE	kshv-miR-K12-6-3p,kshv-miR-K12-1,kshv-miR-K12-3,kshv-miR-K12-4-3p,kshv-miR-K12-7
NM_152293	226240_at	TR(1..4312)CDS(152..1414)	93624	TADA2B	Homo sapiens transcriptional adaptor 2 (ADA2 homolog, yeast)-beta (TADA2B), mRNA.	-1.33890740046319	4.68070572611870	0.00016571806323712	TRUE	kshv-miR-K12-5,kshv-miR-K12-1,kshv-miR-K12-11,kshv-miR-K12-3,kshv-miR-K12-6-5p,kshv-miR-K12-9*
NM_005640	235020_at	TR(1..4777)CDS(490..3078)	6875	TAF4B	Homo sapiens TAF4b RNA polymerase II, TATA box binding protein (TBP)-associated factor, 105kDa (TAF4B), mRNA.	-0.769616757560618	8.7161791512548	0.00594555425534063	TRUE	kshv-miR-K12-2,kshv-miR-K12-11,kshv-miR-K12-3,kshv-miR-K12-4-3p
NM_138572	1556978_a_at,1556176_at,229412_at	TR(1..4323)CDS(30..962)	129685	TAF8	Homo sapiens TAF8 RNA polymerase II, TATA box binding protein (TBP)-associated factor, 43kDa (TAF8), mRNA.	-0.72215090462573	3.93186078791121	0.000326125141671274	TRUE	kshv-miR-K12-8,kshv-miR-K12-1,kshv-miR-K12-3,kshv-miR-K12-6-5p,kshv-miR-K12-4-3p,kshv-miR-K12-9*
NM_015527	220947_s_at	TR(1..3326)CDS(19..2445)	26000	TBC1D10B	Homo sapiens TBC1 domain family, member 10B (TBC1D10B), mRNA.	-1.11625032555984	7.01292725175142	0.0165214229198270	TRUE	kshv-miR-K12-6-5p,kshv-miR-K12-9*
NM_144628	226664_at,226409_at	TR(1..4456)CDS(139..1350)	128637	TBC1D20	Homo sapiens TBC1 domain family, member 20 (TBC1D20), mRNA.	-0.781734064516795	5.09015074041166	0.0071538046099735	TRUE	kshv-miR-K12-5,kshv-miR-K12-2,kshv-miR-K12-1,kshv-miR-K12-11,kshv-miR-K12-6-5p,kshv-miR-K12-9*
NM_001134415	206451_at	TR(1..3080)CDS(481..2154)	55171	TBCCD1	Homo sapiens TBCC domain containing 1 (TBCCD1), transcript variant 1, mRNA.	-0.80937852089415	6.95150693675366	0.00510734891261937	TRUE	kshv-miR-K12-9*
NM_001040006	202396_at	TR(1..4170)CDS(41..3274)	10915	TCERG1	Homo sapiens transcription elongation regulator 1 (TCERG1), transcript variant 2, mRNA.	-0.640115685202857	11.2805990968028	0.00370690653948176	TRUE	kshv-miR-K12-6-3p,kshv-miR-K12-4-5p
NM_207037	208986_at	TR(1..4806)CDS(295..2415)	6938	TCF12	Homo sapiens transcription factor 12 (TCF12), transcript variant 2, mRNA.	-0.7174504166585	8.858950569763	0.000582654574407068	TRUE	kshv-miR-K12-6-3p,kshv-miR-K12-2,kshv-miR-K12-11
NM_018393	205797_s_at,205796_at	TR(1..2479)CDS(220..1749)	55346	TCP11L1	Homo sapiens t-complex 11 (mouse)-like 1 (TCP11L1), mRNA.	-0.657618474719885	4.33219372862035	0.004613952112202	TRUE	kshv-miR-K12-9*
NM_001010870	232692_at	TR(1..6817)CDS(1..6291)	221400	TDRD6	Homo sapiens tudor domain containing 6 (TDRD6), mRNA.	-0.661556118608586	2.66364814970317	0.00144265543387060	TRUE	kshv-miR-K12-4-3p,kshv-miR-K12-7,kshv-miR-K12-4-5p
NM_016111	209528_s_at,34260_at	TR(1..3319)CDS(222..2735)	9894	TELO2	Homo sapiens TEL2, telomere maintenance 2, homolog (S. cerevisiae) (TELO2), mRNA.	-0.790303086064873	5.66931324104611	0.0453427983328224	TRUE	kshv-miR-K12-6-5p
NM_018975	201174_s_at	TR(1..2146)CDS(98..1297)	54386	TERF2IP	Homo sapiens telomeric repeat binding factor 2, interacting protein (TERF2IP), mRNA.	-0.520668760140773	10.3614605060057	0.0493657870198793	TRUE	kshv-miR-K12-6-5p
NM_007170	205486_at	TR(1..3093)CDS(404..2119)	10420	TESK2	Homo sapiens testis-specific kinase 2 (TESK2), mRNA.	-0.511061361942347	4.73884869349207	0.043444364982267	FALSE	kshv-miR-K12-4-3p
NM_006521	206649_s_at,212457_at,1565347_s_at	TR(1..3431)CDS(239..1966)	7030	TFE3	Homo sapiens transcription factor binding to IGHM enhancer 3 (TFE3), mRNA.	-0.861748547148096	4.6890039182258	0.00515851807212689	TRUE	kshv-miR-K12-1,kshv-miR-K12-4-3p,kshv-miR-K12-7
NM_001130475	227636_at	TR(1..3306)CDS(155..1342)	168451	THAP5	Homo sapiens THAP domain containing 5 (THAP5), transcript variant 1, mRNA.	-0.68038547249314	8.97638148456673	0.00747774373085318	TRUE	kshv-miR-K12-8,kshv-miR-K12-6-3p,kshv-miR-K12-1,kshv-miR-K12-9*,kshv-miR-K12-4-5p
NM_017736	213025_at	TR(1..4416)CDS(139..1200)	55623	THUMPD1	Homo sapiens THUMP domain containing 1 (THUMPD1), mRNA.	-0.78116031267479	8.84931216616142	9.0562469104982e-05	TRUE	kshv-miR-K12-1,kshv-miR-K12-6-5p,kshv-miR-K12-4-3p,kshv-miR-K12-4-5p
NM_052864	238858_at,226117_at	TR(1..3090)CDS(283..837)	92610	TIFA	Homo sapiens TRAF-interacting protein with forkhead-associated domain (TIFA), mRNA.	-0.59303724727781	8.39257143647663	0.000264385976775027	TRUE	kshv-miR-K12-6-3p,kshv-miR-K12-1,kshv-miR-K12-3,kshv-miR-K12-4-3p,kshv-miR-K12-9*,kshv-miR-K12-4-5p
NM_145702	1553099_at	TR(1..2448)CDS(635..2410)	200765	TIGD1	Homo sapiens tigger transposable element derived 1 (TIGD1), mRNA.	-0.591932601689721	7.78229892787959	0.00951379021066938	TRUE	kshv-miR-K12-4-5p
NM_033208	238793_at,224365_s_at	TR(1..2569)CDS(787..2436)	91151	TIGD7	Homo sapiens tigger transposable element derived 7 (TIGD7), mRNA.	-0.933412709080792	3.86421510704302	0.00129078014492404	TRUE	kshv-miR-K12-4-5p
NM_012460	218316_at	TR(1..1108)CDS(427..696)	26520	TIMM9	Homo sapiens translocase of inner mitochondrial membrane 9 homolog (yeast) (TIMM9), nuclear gene encoding mitochondrial protein, mRNA.	-0.548534648635351	8.89514476738564	0.0460346392371852	TRUE	kshv-miR-K12-6-3p
NM_005078	212770_at,206472_s_at,212769_at	TR(1..5354)CDS(1120..3438)	7090	TLE3	Homo sapiens transducin-like enhancer of split 3 (E(sp1) homolog, Drosophila) (TLE3), transcript variant 1, mRNA.	-1.07808550270770	6.91316536599514	0.000256064974594033	TRUE	kshv-miR-K12-2,kshv-miR-K12-6-5p
NM_001136555	244389_at	TR(1..5081)CDS(91..2103)	9874	TLK1	Homo sapiens tousled-like kinase 1 (TLK1), transcript variant 3, mRNA.	-1.01634137764712	3.69998527445359	2.29184863664288e-05	TRUE	kshv-miR-K12-6-3p,kshv-miR-K12-1,kshv-miR-K12-3,kshv-miR-K12-6-5p,kshv-miR-K12-4-3p,kshv-miR-K12-9
NM_006289	203254_s_at	TR(1..8187)CDS(91..7716)	7094	TLN1	Homo sapiens talin 1 (TLN1), mRNA.	-0.939899984829207	5.87874398924745	0.0340020282919161	TRUE	kshv-miR-K12-6-5p
NM_014742	212198_s_at,212194_s_at	TR(1..3996)CDS(236..2164)	9777	TM9SF4	Homo sapiens transmembrane 9 superfamily protein member 4 (TM9SF4), mRNA.	-0.575905655767683	6.26315343607913	0.000179630248978612	TRUE	kshv-miR-K12-1
NM_022152	217730_at	TR(1..2375)CDS(133..1068)	64114	TMBIM1	Homo sapiens transmembrane BAX inhibitor motif containing 1 (TMBIM1), mRNA.	-0.973528527348283	6.48941406989226	0.0037416750186847	TRUE	kshv-miR-K12-6-5p,kshv-miR-K12-9*
NM_001127198	204328_at,214958_s_at	TR(1..2891)CDS(244..2661)	11322	TMC6	Homo sapiens transmembrane channel-like 6 (TMC6), transcript variant 1, mRNA.	-1.41131209978470	5.40721990047361	0.000113502616772742	TRUE	kshv-miR-K12-8,kshv-miR-K12-9*
NM_024092	201361_at	TR(1..2097)CDS(73..804)	79073	TMEM109	Homo sapiens transmembrane protein 109 (TMEM109), mRNA.	-0.532443421011181	7.52141267116884	0.0377711768493612	TRUE	kshv-miR-K12-6-5p
NM_052932	211967_at	TR(1..3605)CDS(422..1048)	114908	TMEM123	Homo sapiens transmembrane protein 123 (TMEM123), mRNA.	-0.718970276361074	11.3637545731676	0.000235646535162019	TRUE	kshv-miR-K12-11,kshv-miR-K12-4-3p,kshv-miR-K12-4-5p
NM_152680	238063_at	TR(1..3085)CDS(107..658)	201799	TMEM154	Homo sapiens transmembrane protein 154 (TMEM154), mRNA.	-0.712834736098422	7.5446249267555	0.033546679510803	TRUE	kshv-miR-K12-3,kshv-miR-K12-6-5p,kshv-miR-K12-9*,kshv-miR-K12-7,kshv-miR-K12-9
NM_020422	213272_s_at	TR(1..1922)CDS(362..847)	57146	TMEM159	Homo sapiens transmembrane protein 159 (TMEM159), mRNA.	-0.7629892237366	5.24344414967403	0.00507807438094651	TRUE	kshv-miR-K12-9*
NM_001100389	1555790_a_at,226589_at	TR(1..4511)CDS(100..915)	201931	TMEM192	Homo sapiens transmembrane protein 192 (TMEM192), mRNA.	-0.758942535418895	7.03142294377937	0.0254744239946402	TRUE	kshv-miR-K12-2,kshv-miR-K12-1,kshv-miR-K12-6-5p,kshv-miR-K12-9*,kshv-miR-K12-7
NM_018087	218073_s_at	TR(1..2541)CDS(242..2266)	55706	TMEM48	Homo sapiens transmembrane protein 48 (TMEM48), mRNA.	-1.09630226943642	9.1971344117379	0.00177536380228114	TRUE	kshv-miR-K12-6-5p
NM_006134	219600_s_at	TR(1..2350)CDS(179..655)	757	TMEM50B	Homo sapiens transmembrane protein 50B (TMEM50B), mRNA.	-1.00093427278446	6.79377007335106	0.0352749694945713	TRUE	kshv-miR-K12-1
NM_018202	218562_s_at,241364_at	TR(1..3940)CDS(203..2197)	55219	TMEM57	Homo sapiens transmembrane protein 57 (TMEM57), mRNA.	-0.818681719233294	6.98351991457242	0.0061265264528613	TRUE	kshv-miR-K12-1,kshv-miR-K12-11,kshv-miR-K12-4-3p,kshv-miR-K12-9*
NM_016127	200847_s_at	TR(1..1977)CDS(185..1204)	51669	TMEM66	Homo sapiens transmembrane protein 66 (TMEM66), mRNA.	-0.558098039103811	11.5591376093841	1.61332895897800e-05	TRUE	kshv-miR-K12-11,kshv-miR-K12-4-3p
NM_152417	226483_at	TR(1..2317)CDS(173..946)	137695	TMEM68	Homo sapiens transmembrane protein 68 (TMEM68), mRNA.	-0.779389677424604	7.47524017615706	0.0177659844109286	TRUE	kshv-miR-K12-3,kshv-miR-K12-9*,kshv-miR-K12-4-5p
NM_032813	225666_at,1554101_a_at,1554102_a_at	TR(1..3771)CDS(314..2596)	84899	TMTC4	Homo sapiens transmembrane and tetratricopeptide repeat containing 4 (TMTC4), transcript variant 1, mRNA.	-0.504125395054113	5.51138615314497	0.0156657539016925	TRUE	kshv-miR-K12-7
NM_024107	218419_s_at	TR(1..1942)CDS(150..1055)	79089	TMUB2	Homo sapiens transmembrane and ubiquitin-like domain containing 2 (TMUB2), transcript variant 1, mRNA.	-0.859721201202263	6.35020858746645	0.00973466805008504	TRUE	kshv-miR-K12-6-5p,kshv-miR-K12-9*
NM_021137	201207_at,201208_s_at	TR(1..3571)CDS(212..1162)	7126	TNFAIP1	Homo sapiens tumor necrosis factor, alpha-induced protein 1 (endothelial) (TNFAIP1), mRNA.	-0.871273566892653	4.34135413439749	0.0320195573664872	TRUE	kshv-miR-K12-6-3p,kshv-miR-K12-3,kshv-miR-K12-6-5p,kshv-miR-K12-9*,kshv-miR-K12-7
NM_005749	202704_at	TR(1..1830)CDS(36..1073)	10140	TOB1	Homo sapiens transducer of ERBB2, 1 (TOB1), mRNA.	-1.05301475109872	9.5156936049094	7.90815887203051e-06	TRUE	kshv-miR-K12-2,kshv-miR-K12-4-3p
NM_001126117	201746_at,211300_s_at	TR(1..2331)CDS(279..923)	7157	TP53	Homo sapiens tumor protein p53 (TP53), transcript variant 7, mRNA.	-0.599471969833103	7.55060967600304	0.00442666783826969	TRUE	kshv-miR-K12-2,kshv-miR-K12-9*
NM_021202	224836_at	TR(1..4124)CDS(336..998)	58476	TP53INP2	Homo sapiens tumor protein p53 inducible nuclear protein 2 (TP53INP2), mRNA.	-1.25197833588988	6.82014510111595	4.17243861669161e-05	TRUE	kshv-miR-K12-2,kshv-miR-K12-6-5p,kshv-miR-K12-4-3p,kshv-miR-K12-9*,kshv-miR-K12-9
NM_001025253	201691_s_at,201689_s_at,201690_s_at,201688_s_at,236655_at	TR(1..4035)CDS(159..782)	7163	TPD52	Homo sapiens tumor protein D52 (TPD52), transcript variant 2, mRNA.	-1.22472485041357	9.64850454634725	5.08730195553775e-07	TRUE	kshv-miR-K12-6-3p,kshv-miR-K12-5,kshv-miR-K12-1,kshv-miR-K12-11,kshv-miR-K12-4-3p,kshv-miR-K12-4-5p
NM_003289	212654_at,204083_s_at	TR(1..1327)CDS(240..1094)	7169	TPM2	Homo sapiens tropomyosin 2 (beta) (TPM2), transcript variant 1, mRNA.	-1.10536355247708	7.96235335565197	0.00443909557770018	TRUE	kshv-miR-K12-9*
NM_013293	204658_at	TR(1..1852)CDS(215..1063)	29896	TRA2A	Homo sapiens transformer-2 alpha (TRA2A), mRNA.	-1.20380767873137	9.3906233244337	4.09815561392243e-05	TRUE	kshv-miR-K12-1,kshv-miR-K12-4-5p
NM_005658	205599_at,235116_at	TR(1..4449)CDS(573..1823)	7185	TRAF1	Homo sapiens TNF receptor-associated factor 1 (TRAF1), mRNA.	-0.669141914593404	2.89123736432257	0.000256866374190948	TRUE	kshv-miR-K12-5,kshv-miR-K12-6-5p,kshv-miR-K12-9*
NM_014965	214924_s_at,226013_at,201283_s_at,202080_s_at,202079_s_at	TR(1..4630)CDS(194..2254)	22906	TRAK1	Homo sapiens trafficking protein, kinesin binding 1 (TRAK1), transcript variant 2, mRNA.	-0.934743013272882	6.03771248013975	0.00032722449172546	TRUE	kshv-miR-K12-5,kshv-miR-K12-11,kshv-miR-K12-7,kshv-miR-K12-4-5p
NM_025195	202241_at	TR(1..3658)CDS(583..1701)	10221	TRIB1	Homo sapiens tribbles homolog 1 (Drosophila) (TRIB1), mRNA.	-0.757993620353076	7.6700500247022	0.0488673249788798	TRUE	kshv-miR-K12-3,kshv-miR-K12-6-5p
NM_033091	223384_s_at	TR(1..3323)CDS(131..1555)	89122	TRIM4	Homo sapiens tripartite motif-containing 4 (TRIM4), transcript variant beta, mRNA.	-1.05436292887198	7.6765308966525	0.0142685197222940	TRUE	kshv-miR-K12-4-5p,kshv-miR-K12-9
NM_032765	1568594_s_at	TR(1..2244)CDS(306..1199)	84851	TRIM52	Homo sapiens tripartite motif-containing 52 (TRIM52), mRNA.	-0.635029742541685	3.43834887140207	0.0442558037784783	TRUE	kshv-miR-K12-7
NM_173084	227801_at,235476_at,222170_at	TR(1..3886)CDS(196..1407)	286827	TRIM59	Homo sapiens tripartite motif-containing 59 (TRIM59), mRNA.	-0.59489680470485	5.29314050777144	0.0338279156456282	TRUE	kshv-miR-K12-6-5p,kshv-miR-K12-4-3p,kshv-miR-K12-9*
NM_021648	212928_at	TR(1..4144)CDS(91..1335)	23270	TSPYL4	Homo sapiens TSPY-like 4 (TSPYL4), mRNA.	-0.725500661385036	6.57327931315519	0.0212890273789786	TRUE	kshv-miR-K12-6-3p,kshv-miR-K12-5,kshv-miR-K12-3,kshv-miR-K12-6-5p,kshv-miR-K12-4-5p,kshv-miR-K12-9
NM_001042601	225180_at,225178_at	TR(1..4813)CDS(133..1452)	151613	TTC14	Homo sapiens tetratricopeptide repeat domain 14 (TTC14), transcript variant 2, mRNA.	-0.896159725591554	8.10050044455068	0.00938651483697863	TRUE	kshv-miR-K12-5,kshv-miR-K12-2,kshv-miR-K12-1,kshv-miR-K12-6-5p,kshv-miR-K12-4-3p,kshv-miR-K12-4-5p
NM_014673	203584_at	TR(1..1268)CDS(36..929)	9694	TTC35	Homo sapiens tetratricopeptide repeat domain 35 (TTC35), mRNA.	-0.830518710202129	9.31909313897448	0.0186059653998218	TRUE	kshv-miR-K12-2,kshv-miR-K12-1,kshv-miR-K12-3
NM_014639	203049_s_at,1554029_a_at,203048_s_at	TR(1..5167)CDS(271..4965)	9652	TTC37	Homo sapiens tetratricopeptide repeat domain 37 (TTC37), mRNA.	-0.606680725721175	6.98707106087002	0.0411146536575241	TRUE	kshv-miR-K12-9
NM_015351	213174_at,213172_at	TR(1..5217)CDS(344..1012)	23508	TTC9	Homo sapiens tetratricopeptide repeat domain 9 (TTC9), mRNA.	-0.863876151352105	5.43062525988748	0.00363082376407842	TRUE	kshv-miR-K12-5,kshv-miR-K12-3,kshv-miR-K12-6-5p,kshv-miR-K12-4-3p,kshv-miR-K12-9*
NM_003594	204407_at	TR(1..4860)CDS(21..3509)	8458	TTF2	Homo sapiens transcription termination factor, RNA polymerase II (TTF2), mRNA.	-0.941014378343848	9.16552104668658	0.0030904514847798	TRUE	kshv-miR-K12-6-3p,kshv-miR-K12-5,kshv-miR-K12-1
NM_016262	226181_at	TR(1..2096)CDS(20..1447)	51175	TUBE1	Homo sapiens tubulin, epsilon 1 (TUBE1), mRNA.	-1.34391662272225	8.89766439320658	0.00299098209212477	TRUE	kshv-miR-K12-4-3p
NM_175852	212300_at	TR(1..4843)CDS(66..1706)	200081	TXLNA	Homo sapiens taxilin alpha (TXLNA), mRNA.	-0.844887235679095	7.01344602724644	0.0112640264586176	TRUE	kshv-miR-K12-2,kshv-miR-K12-1,kshv-miR-K12-3,kshv-miR-K12-6-5p,kshv-miR-K12-9*
NM_020784	226747_at	TR(1..4552)CDS(362..2839)	57544	TXNDC16	Homo sapiens thioredoxin domain containing 16 (TXNDC16), mRNA.	-0.78133270404523	8.0258770282846	0.0288416691298159	TRUE	kshv-miR-K12-4-3p,kshv-miR-K12-4-5p,kshv-miR-K12-9
NM_000550	205694_at	TR(1..2876)CDS(179..1792)	7306	TYRP1	Homo sapiens tyrosinase-related protein 1 (TYRP1), mRNA.	-1.46381867564531	3.10153232519393	0.0194496263411197	TRUE	kshv-miR-K12-11,kshv-miR-K12-9*
NM_024818	222578_s_at,218289_s_at,222579_at	TR(1..3044)CDS(243..1457)	79876	UBA5	Homo sapiens ubiquitin-like modifier activating enzyme 5 (UBA5), transcript variant 1, mRNA.	-0.574151692497916	7.33288096278964	0.0324972640708826	TRUE	kshv-miR-K12-1
NM_003338	214590_s_at,211764_s_at	TR(1..2669)CDS(224..667)	7321	UBE2D1	Homo sapiens ubiquitin-conjugating enzyme E2D 1 (UBC4/5 homolog, yeast) (UBE2D1), mRNA.	-0.59691702686841	6.89072313611032	0.000761106978865104	TRUE	kshv-miR-K12-1,kshv-miR-K12-3,kshv-miR-K12-4-3p,kshv-miR-K12-4-5p
NM_016021	217823_s_at,217824_at,217825_s_at,217826_s_at,222435_s_at	TR(1..4360)CDS(332..1288)	51465	UBE2J1	Homo sapiens ubiquitin-conjugating enzyme E2, J1 (UBC6 homolog, yeast) (UBE2J1), mRNA.	-0.650118029004808	9.65494415244983	0.0217740617417257	TRUE	kshv-miR-K12-1,kshv-miR-K12-6-5p,kshv-miR-K12-4-3p,kshv-miR-K12-4-5p
NM_006048	210685_s_at,202317_s_at,215533_s_at	TR(1..5556)CDS(714..4235)	10277	UBE4B	Homo sapiens ubiquitination factor E4B (UFD2 homolog, yeast) (UBE4B), transcript variant 2, mRNA.	-0.774836359500222	5.87176959840162	0.0126636768062962	TRUE	kshv-miR-K12-3,kshv-miR-K12-4-3p,kshv-miR-K12-7
NM_019116	205687_at,224878_at	TR(1..4931)CDS(203..1132)	56061	UBFD1	Homo sapiens ubiquitin family domain containing 1 (UBFD1), mRNA.	-1.37827753531093	6.06546398141422	0.000929176876953693	TRUE	kshv-miR-K12-1,kshv-miR-K12-11,kshv-miR-K12-6-5p,kshv-miR-K12-4-3p
NM_001128160	218082_s_at	TR(1..4054)CDS(531..2045)	7342	UBP1	Homo sapiens upstream binding protein 1 (LBP-1a) (UBP1), transcript variant 2, mRNA.	-0.53740750999123	9.1729041717609	0.00185585459087967	TRUE	kshv-miR-K12-5,kshv-miR-K12-4-5p,kshv-miR-K12-9
NM_013444	215884_s_at	TR(1..3324)CDS(236..2110)	29978	UBQLN2	Homo sapiens ubiquilin 2 (UBQLN2), mRNA.	-0.510449876889554	9.23876424033925	0.0319134697144687	TRUE	kshv-miR-K12-2,kshv-miR-K12-11
NM_001076684	1558215_s_at,214881_s_at,202692_s_at,225982_at	TR(1..4604)CDS(180..2363)	7343	UBTF	Homo sapiens upstream binding transcription factor, RNA polymerase I (UBTF), transcript variant 3, mRNA.	-1.01203410105337	6.30127250990512	0.000782662106345573	TRUE	kshv-miR-K12-2,kshv-miR-K12-6-5p,kshv-miR-K12-9*
NM_015054	1554291_at,213118_at,1554292_a_at	TR(1..5195)CDS(230..4624)	23074	UHRF1BP1L	Homo sapiens UHRF1 binding protein 1-like (UHRF1BP1L), transcript variant 1, mRNA.	-0.517588213441717	4.93038953136639	0.0458286860796094	TRUE	kshv-miR-K12-3
NM_016290	220746_s_at	TR(1..2656)CDS(168..2327)	51720	UIMC1	Homo sapiens ubiquitin interaction motif containing 1 (UIMC1), mRNA.	-0.71879651309353	9.30764588467208	0.0137725567078282	TRUE	kshv-miR-K12-4-3p
NM_015542	203519_s_at	TR(1..5185)CDS(74..3892)	26019	UPF2	Homo sapiens UPF2 regulator of nonsense transcripts homolog (yeast) (UPF2), transcript variant 2, mRNA.	-0.516654631743976	8.89265466262238	0.0464701620088059	TRUE	kshv-miR-K12-2,kshv-miR-K12-11
NM_020935	226729_at,232033_at,226730_s_at	TR(1..8032)CDS(414..3353)	57695	USP37	Homo sapiens ubiquitin specific peptidase 37 (USP37), mRNA.	-0.558292703535886	6.66397959759549	0.00221791438607493	TRUE	kshv-miR-K12-6-3p,kshv-miR-K12-11,kshv-miR-K12-3,kshv-miR-K12-6-5p,kshv-miR-K12-4-3p,kshv-miR-K12-4-5p
NM_001080481	224441_s_at,238057_at	TR(1..6388)CDS(534..2978)	85015	USP45	Homo sapiens ubiquitin specific peptidase 45 (USP45), mRNA.	-1.10679417449409	5.38032650639892	0.00103934835948345	TRUE	kshv-miR-K12-2,kshv-miR-K12-3,kshv-miR-K12-4-3p,kshv-miR-K12-9,kshv-miR-K12-6-3p,kshv-miR-K12-11,kshv-miR-K12-1,kshv-miR-K12-5
NM_032236	229812_at,225925_s_at,220079_s_at,220078_at	TR(1..4465)CDS(239..3346)	84196	USP48	Homo sapiens ubiquitin specific peptidase 48 (USP48), transcript variant 1, mRNA.	-0.541935173147421	7.23987999073169	0.000115088940918545	TRUE	kshv-miR-K12-5,kshv-miR-K12-11,kshv-miR-K12-4-3p
NM_003762	211760_s_at,207350_s_at	TR(1..2126)CDS(215..640)	8674	VAMP4	Homo sapiens vesicle-associated membrane protein 4 (VAMP4), mRNA.	-0.616745673126287	5.04720975578745	0.0071296027154895	TRUE	kshv-miR-K12-6-3p,kshv-miR-K12-3
NM_017599	223089_at,223675_s_at	TR(1..4580)CDS(106..2445)	55591	VEZT	Homo sapiens vezatin, adherens junctions transmembrane protein (VEZT), mRNA.	-0.489306004190361	8.22179242521633	0.00171289914968030	TRUE	kshv-miR-K12-5,kshv-miR-K12-1,kshv-miR-K12-4-3p,kshv-miR-K12-4-5p
NM_014703	204376_at,226476_s_at,204377_s_at	TR(1..5984)CDS(169..4692)	9730	VPRBP	Homo sapiens Vpr (HIV-1) binding protein (VPRBP), mRNA.	-0.665159363358451	3.93330699269143	0.00438572131919185	TRUE	kshv-miR-K12-4-3p,kshv-miR-K12-9*,kshv-miR-K12-9
NM_052875	225483_at,230306_at	TR(1..3685)CDS(457..1467)	112936	VPS26B	Homo sapiens vacuolar protein sorting 26 homolog B (S. pombe) (VPS26B), mRNA.	-1.32762084029240	5.87912570278098	0.000786423318844845	TRUE	kshv-miR-K12-5,kshv-miR-K12-4-3p,kshv-miR-K12-9*
NM_012478	209117_at	TR(1..1944)CDS(124..909)	23558	WBP2	Homo sapiens WW domain binding protein 2 (WBP2), mRNA.	-0.993701428237296	7.36599601976066	0.0274602412607867	TRUE	kshv-miR-K12-1,kshv-miR-K12-3,kshv-miR-K12-6-5p,kshv-miR-K12-9*
NM_024345	230679_at,219001_s_at,226511_at	TR(1..7932)CDS(75..1754)	79269	WDR32	Homo sapiens WD repeat domain 32 (WDR32), mRNA.	-0.532829032336567	5.35586654789377	0.00541511441603456	TRUE	kshv-miR-K12-2,kshv-miR-K12-1,kshv-miR-K12-11,kshv-miR-K12-6-5p,kshv-miR-K12-4-3p,kshv-miR-K12-4-5p,kshv-miR-K12-9
NM_018383	222763_s_at,223147_s_at,223146_at,229141_at	TR(1..6299)CDS(184..4194)	55339	WDR33	Homo sapiens WD repeat domain 33 (WDR33), transcript variant 1, mRNA.	-0.836088843291573	6.99620497489574	0.00338846913768151	TRUE	kshv-miR-K12-3,kshv-miR-K12-4-3p,kshv-miR-K12-9*,kshv-miR-K12-7
NM_019045	219297_at	TR(1..4154)CDS(426..3167)	54521	WDR44	Homo sapiens WD repeat domain 44 (WDR44), mRNA.	-0.680342420151948	5.79346848244242	4.35123041495333e-05	TRUE	kshv-miR-K12-11
NM_172240	226283_at	TR(1..2984)CDS(106..1542)	282809	WDR51B	Homo sapiens WD repeat domain 51B (WDR51B), mRNA.	-0.54910561747464	7.66831539118915	0.00030602833891999	TRUE	kshv-miR-K12-3,kshv-miR-K12-4-3p
NM_018024	219060_at	TR(1..1348)CDS(126..743)	55093	WDYHV1	Homo sapiens WDYHV motif containing 1 (WDYHV1), mRNA.	-0.709546125652593	8.78929339557497	0.0112492340789519	TRUE	kshv-miR-K12-3
NM_003390	212533_at,215711_s_at	TR(1..4232)CDS(1142..3082)	7465	WEE1	Homo sapiens WEE1 homolog (S. pombe) (WEE1), mRNA.	-1.23725931053770	9.53017257060464	0.000657354107939857	TRUE	kshv-miR-K12-1,kshv-miR-K12-11
NM_133335	209053_s_at,223472_at,209054_s_at,222778_s_at,222777_s_at,209052_s_at	TR(1..7543)CDS(140..4237)	7468	WHSC1	Homo sapiens Wolf-Hirschhorn syndrome candidate 1 (WHSC1), transcript variant 3, mRNA.	-0.775090313738468	7.03378658094759	0.0134776296435850	TRUE	kshv-miR-K12-5,kshv-miR-K12-1,kshv-miR-K12-3,kshv-miR-K12-6-5p,kshv-miR-K12-9
NM_005663	203112_s_at,34225_at	TR(1..2466)CDS(241..1860)	7469	WHSC2	Homo sapiens Wolf-Hirschhorn syndrome candidate 2 (WHSC2), mRNA.	-0.503075738627581	8.18887129175009	0.0177340612878812	TRUE	kshv-miR-K12-6-5p
NM_032345	224465_s_at	TR(1..1240)CDS(153..767)	84305	WIBG	Homo sapiens within bgcn homolog (Drosophila) (WIBG), mRNA.	-0.742357933361227	6.55046178314852	0.0486370136605812	TRUE	kshv-miR-K12-6-5p
NM_133264	212051_at,212049_at,212050_at	TR(1..5525)CDS(241..1563)	147179	WIPF2	Homo sapiens WAS/WASL interacting protein family, member 2 (WIPF2), mRNA.	-0.50348940578231	6.9101428991437	0.00655144417986318	TRUE	kshv-miR-K12-6-3p,kshv-miR-K12-5,kshv-miR-K12-2,kshv-miR-K12-1,kshv-miR-K12-3,kshv-miR-K12-6-5p
NM_001039673	1554553_s_at,226437_at	TR(1..1233)CDS(50..985)	90522	YIF1B	Homo sapiens Yip1 interacting factor homolog B (S. cerevisiae) (YIF1B), transcript variant 4, mRNA.	-0.647171178788419	6.33979730383673	0.0393578259939164	TRUE	kshv-miR-K12-6-5p
NM_019589	212787_at	TR(1..8150)CDS(125..6565)	56252	YLPM1	Homo sapiens YLP motif containing 1 (YLPM1), mRNA.	-0.641562426956961	8.83664800327587	0.00648809735699596	TRUE	kshv-miR-K12-6-5p,kshv-miR-K12-4-3p,kshv-miR-K12-4-5p,kshv-miR-K12-9
NM_013313	228296_at,228788_at,213996_at	TR(1..4301)CDS(333..692)	29799	YPEL1	Homo sapiens yippee-like 1 (Drosophila) (YPEL1), mRNA.	-0.909100809138246	5.72060005253048	0.00621359402765491	TRUE	kshv-miR-K12-1,kshv-miR-K12-3,kshv-miR-K12-9*,kshv-miR-K12-4-5p
NM_022828	213077_at,1568680_s_at,205835_s_at,205836_s_at	TR(1..6301)CDS(184..4476)	64848	YTHDC2	Homo sapiens YTH domain containing 2 (YTHDC2), mRNA.	-0.59883138338752	5.78161187233163	0.0107178974808098	TRUE	kshv-miR-K12-1,kshv-miR-K12-11
NM_003405	201020_at	TR(1..1807)CDS(242..982)	7533	YWHAH	Homo sapiens tyrosine 3-monooxygenase/tryptophan 5-monooxygenase activation protein, eta polypeptide (YWHAH), mRNA.	-0.969596943259578	8.37750057959348	0.0289431292549721	TRUE	kshv-miR-K12-2
NM_001105539	219312_s_at	TR(1..6061)CDS(599..3214)	65986	ZBTB10	Homo sapiens zinc finger and BTB domain containing 10 (ZBTB10), transcript variant 1, mRNA.	-1.20548100507803	6.8383308148479	0.0110985908233455	TRUE	kshv-miR-K12-2,kshv-miR-K12-1,kshv-miR-K12-4-3p
NM_020861	226284_at	TR(1..3105)CDS(136..1680)	57621	ZBTB2	Homo sapiens zinc finger and BTB domain containing 2 (ZBTB2), mRNA.	-0.907937107508551	9.11276720319723	0.00347727632831094	TRUE	kshv-miR-K12-5,kshv-miR-K12-1,kshv-miR-K12-3,kshv-miR-K12-4-3p
NM_001099270	227111_at	TR(1..6577)CDS(98..1600)	403341	ZBTB34	Homo sapiens zinc finger and BTB domain containing 34 (ZBTB34), mRNA.	-0.817593568365108	6.68934738286254	0.000226594572236962	TRUE	kshv-miR-K12-8,kshv-miR-K12-6-3p,kshv-miR-K12-2,kshv-miR-K12-1,kshv-miR-K12-3
NM_194314	226962_at	TR(1..8474)CDS(70..2799)	360023	ZBTB41	Homo sapiens zinc finger and BTB domain containing 41 (ZBTB41), mRNA.	-0.597377689551949	6.20392577999655	0.00093303939660796	TRUE	kshv-miR-K12-3,kshv-miR-K12-4-3p,kshv-miR-K12-9,kshv-miR-K12-11,kshv-miR-K12-1,kshv-miR-K12-6-5p,kshv-miR-K12-4-5p,kshv-miR-K12-9*
NM_001040441	235142_at	TR(1..7333)CDS(486..1811)	653121	ZBTB8	Homo sapiens zinc finger and BTB domain containing 8 (ZBTB8), mRNA.	-1.64433834266676	3.34782553409414	0.00765067827197986	TRUE	kshv-miR-K12-2,kshv-miR-K12-3,kshv-miR-K12-9,kshv-miR-K12-6-3p,kshv-miR-K12-11,kshv-miR-K12-1,kshv-miR-K12-6-5p,kshv-miR-K12-9*
NM_017742	222816_s_at,219062_s_at	TR(1..5559)CDS(1..3537)	54877	ZCCHC2	Homo sapiens zinc finger, CCHC domain containing 2 (ZCCHC2), mRNA.	-0.81986792331615	6.79333184364148	0.0163892150490414	TRUE	kshv-miR-K12-3,kshv-miR-K12-6-5p
NM_024617	220933_s_at,242776_at	TR(1..5648)CDS(216..4703)	79670	ZCCHC6	Homo sapiens zinc finger, CCHC domain containing 6 (ZCCHC6), mRNA.	-0.728982664203931	6.23738033595115	0.0443666055290481	TRUE	kshv-miR-K12-1
NM_032283	212860_at	TR(1..3163)CDS(96..1262)	84243	ZDHHC18	Homo sapiens zinc finger, DHHC-type containing 18 (ZDHHC18), mRNA.	-0.658484544594932	6.10999523739621	0.0393885569283369	TRUE	kshv-miR-K12-5,kshv-miR-K12-3,kshv-miR-K12-4-3p,kshv-miR-K12-9*
NM_173570	226912_at	TR(1..3778)CDS(300..1529)	254887	ZDHHC23	Homo sapiens zinc finger, DHHC-type containing 23 (ZDHHC23), mRNA.	-0.966450306324434	7.68500912086475	0.0158792562236715	TRUE	kshv-miR-K12-5,kshv-miR-K12-4-3p,kshv-miR-K12-4-5p,kshv-miR-K12-9
NM_001008222	222451_s_at	TR(1..2913)CDS(370..1464)	51114	ZDHHC9	Homo sapiens zinc finger, DHHC-type containing 9 (ZDHHC9), transcript variant 2, mRNA.	-1.00280125811324	5.5188763643192	0.0197512743326342	TRUE	kshv-miR-K12-6-5p
NM_003407	201531_at	TR(1..1745)CDS(59..1039)	7538	ZFP36	Homo sapiens zinc finger protein 36, C3H type, homolog (mouse) (ZFP36), mRNA.	-1.43702052449405	7.36686735318918	0.0358725424929992	TRUE	kshv-miR-K12-11,kshv-miR-K12-4-3p
NM_032527	221848_at,57539_at	TR(1..2017)CDS(179..1774)	84619	ZGPAT	Homo sapiens zinc finger, CCCH-type with G patch domain (ZGPAT), transcript variant 1, mRNA.	-0.72241849992796	6.35014157533375	0.0033271390344255	TRUE	kshv-miR-K12-6-5p
NM_014943	203556_at	TR(1..4373)CDS(568..3081)	22882	ZHX2	Homo sapiens zinc fingers and homeoboxes 2 (ZHX2), mRNA.	-0.506007875185274	8.6892245596478	0.0193113624195226	TRUE	kshv-miR-K12-11
NM_003437	206240_s_at	TR(1..2988)CDS(101..1723)	7695	ZNF136	Homo sapiens zinc finger protein 136 (ZNF136), mRNA.	-0.954548641510586	4.67853129209334	0.00241651007709528	TRUE	kshv-miR-K12-1,kshv-miR-K12-3
NM_007149	213452_at	TR(1..3095)CDS(268..2523)	7738	ZNF184	Homo sapiens zinc finger protein 184 (ZNF184), mRNA.	-0.725714960638265	8.55327378147966	0.000369029399496885	TRUE	kshv-miR-K12-3
NM_006963	218006_s_at,218005_at	TR(1..2204)CDS(244..918)	7570	ZNF22	Homo sapiens zinc finger protein 22 (KOX 15) (ZNF22), mRNA.	-0.664073094688083	7.36691052694421	0.0169292832323809	TRUE	kshv-miR-K12-6-3p
NM_182490	227689_at,217403_s_at	TR(1..3075)CDS(206..2605)	7770	ZNF227	Homo sapiens zinc finger protein 227 (ZNF227), mRNA.	-1.04627231462756	6.88101757248605	0.0114995406411760	TRUE	kshv-miR-K12-1
NM_001012756	1558700_s_at,228920_at	TR(1..5407)CDS(845..2083)	339324	ZNF260	Homo sapiens zinc finger protein 260 (ZNF260), mRNA.	-0.717321998040555	6.05681360077364	0.00695028012286194	TRUE	kshv-miR-K12-1,kshv-miR-K12-11,kshv-miR-K12-3,kshv-miR-K12-9*,kshv-miR-K12-4-5p,kshv-miR-K12-9
NM_021994	218645_at,1555193_a_at	TR(1..2687)CDS(130..1482)	11179	ZNF277	Homo sapiens zinc finger protein 277 (ZNF277), mRNA.	-0.750685427127019	8.61489075077414	0.0110692421773199	TRUE	kshv-miR-K12-1
NM_015565	233819_s_at,215596_s_at	TR(1..7703)CDS(99..5399)	26046	ZNF294	Homo sapiens zinc finger protein 294 (ZNF294), mRNA.	-0.732112981683206	6.76284864743386	0.00236883671682289	TRUE	kshv-miR-K12-1,kshv-miR-K12-11,kshv-miR-K12-3,kshv-miR-K12-4-3p,kshv-miR-K12-4-5p
NM_001098402	233952_s_at,225539_at	TR(1..7479)CDS(215..3415)	49854	ZNF295	Homo sapiens zinc finger protein 295 (ZNF295), transcript variant 1, mRNA.	-0.584702919919322	7.95999879405987	0.000232215524033476	TRUE	kshv-miR-K12-2,kshv-miR-K12-1,kshv-miR-K12-11,kshv-miR-K12-6-5p,kshv-miR-K12-4-3p,kshv-miR-K12-4-5p
NM_014345	203521_s_at,203520_s_at	TR(1..8021)CDS(79..6918)	24149	ZNF318	Homo sapiens zinc finger protein 318 (ZNF318), mRNA.	-0.615655977368905	8.10557741069796	0.0439957256490853	TRUE	kshv-miR-K12-1,kshv-miR-K12-11,kshv-miR-K12-4-5p,kshv-miR-K12-9
NM_003419	207236_at	TR(1..3162)CDS(379..1845)	25850	ZNF345	Homo sapiens zinc finger protein 345 (ZNF345), mRNA.	-0.8189214447764	2.55497750120833	0.00554135602693338	FALSE	kshv-miR-K12-1,kshv-miR-K12-9*,kshv-miR-K12-4-5p
NM_018660	218149_s_at,222536_s_at,232693_s_at	TR(1..4807)CDS(127..1668)	55893	ZNF395	Homo sapiens zinc finger protein 395 (ZNF395), mRNA.	-0.952185747301871	6.40111264928854	0.00583230726162269	TRUE	kshv-miR-K12-5,kshv-miR-K12-3,kshv-miR-K12-6-5p,kshv-miR-K12-9*
NM_032434	225050_at,1553218_a_at	TR(1..3460)CDS(88..1791)	84450	ZNF512	Homo sapiens zinc finger protein 512 (ZNF512), mRNA.	-0.943146019181492	7.6031954290273	0.0147230905442695	TRUE	kshv-miR-K12-9*
NM_014803	204291_at	TR(1..8296)CDS(858..5309)	9849	ZNF518A	Homo sapiens zinc finger protein 518A (ZNF518A), mRNA.	-0.798777630016738	8.23800346262785	0.00286091339565768	TRUE	kshv-miR-K12-2,kshv-miR-K12-1,kshv-miR-K12-4-3p
NM_152289	235200_at	TR(1..4557)CDS(206..1666)	93134	ZNF561	Homo sapiens zinc finger protein 561 (ZNF561), mRNA.	-1.23915744326574	6.28486647055066	0.00308790677700659	TRUE	kshv-miR-K12-6-3p,kshv-miR-K12-5,kshv-miR-K12-1,kshv-miR-K12-11,kshv-miR-K12-6-5p,kshv-miR-K12-9*
NM_017652	219711_at	TR(1..2215)CDS(187..1395)	54807	ZNF586	Homo sapiens zinc finger protein 586 (ZNF586), mRNA.	-0.721335093101209	6.79007943317568	0.0283097771139606	TRUE	kshv-miR-K12-3
NM_032828	1558251_a_at	TR(1..6845)CDS(139..1866)	84914	ZNF587	Homo sapiens zinc finger protein 587 (ZNF587), mRNA.	-0.69598474199669	2.97458604556602	0.016300744806052	FALSE	kshv-miR-K12-2,kshv-miR-K12-3,kshv-miR-K12-4-3p,kshv-miR-K12-9,kshv-miR-K12-6-3p,kshv-miR-K12-1,kshv-miR-K12-6-5p,kshv-miR-K12-4-5p,kshv-miR-K12-9*
NM_152437	224593_at	TR(1..5125)CDS(1831..2616)	144348	ZNF664	Homo sapiens zinc finger protein 664 (ZNF664), mRNA.	-0.69338580048196	9.72326249047481	0.00323072497713381	TRUE	kshv-miR-K12-2,kshv-miR-K12-11,kshv-miR-K12-3,kshv-miR-K12-9*
NM_182515	232338_at	TR(1..8790)CDS(361..2028)	148206	ZNF714	Homo sapiens zinc finger protein 714 (ZNF714), mRNA.	-1.6635047294516	7.0118008384725	0.0310205170165153	TRUE	kshv-miR-K12-5,kshv-miR-K12-2,kshv-miR-K12-1,kshv-miR-K12-11,kshv-miR-K12-3,kshv-miR-K12-4-3p,kshv-miR-K12-9*,kshv-miR-K12-7
NM_133474	228029_at	TR(1..5170)CDS(692..3463)	170960	ZNF721	Homo sapiens zinc finger protein 721 (ZNF721), mRNA.	-1.37785760921599	9.09967459108473	0.000558847754680594	TRUE	kshv-miR-K12-2,kshv-miR-K12-1,kshv-miR-K12-11,kshv-miR-K12-3
NM_014106	225517_at	TR(1..5418)CDS(312..2387)	54989	ZNF770	Homo sapiens zinc finger protein 770 (ZNF770), mRNA.	-0.856477309818484	9.64059883470741	0.00147135088263236	TRUE	kshv-miR-K12-2,kshv-miR-K12-1,kshv-miR-K12-11,kshv-miR-K12-3,kshv-miR-K12-4-3p,kshv-miR-K12-9*,kshv-miR-K12-9
NM_001080493	229732_at	TR(1..2414)CDS(127..1959)	55552	ZNF823	Homo sapiens zinc finger protein 823 (ZNF823), mRNA.	-1.05646003875296	6.7138034224636	0.0159484126463595	TRUE	kshv-miR-K12-3
NM_147128	226261_at	TR(1..3485)CDS(1052..1780)	223082	ZNRF2	Homo sapiens zinc and ring finger 2 (ZNRF2), mRNA.	-0.893356499333295	5.75214288812970	0.00300779392076253	TRUE	kshv-miR-K12-1,kshv-miR-K12-3,kshv-miR-K12-6-5p,kshv-miR-K12-4-3p,kshv-miR-K12-4-5p
