# Supplementary material for: Kaposi's Sarcoma Herpesvirus microRNAs Target Caspase 3 and Regulate Apoptosis
Source: PLoS Pathog. 2011 Dec 8;7(12):e1002405. doi: 10.1371/journal.ppat.1002405 (PMC3234232; doi:10.1371/journal.ppat.1002405)
Supplement: Dataset S3 — Putative direct targets of the KSHV miRNAs in EA.hy926 cells. For details, please refer to Dataset S2 legend. (XLS) [file ppat.1002405.s003.xls]

## Sheet: TableS3_EHtargets.txt
RefSeq	Affymetrix probe sets	mRNA annotation	Entrez gene ID	Gene name	Gene description	log2 fold change K10/12 vs EGFP	log2 intensity	diff. expression p-value	Detectable	Seed matches to K10/12 miRNAs
NM_018243	201308_s_at,201307_at	TR(1..5582)CDS(163..1452)	55752	2011-09-01	Homo sapiens septin 11 (SEPT11), mRNA.	-1.92196510601285	8.62385777054887	0.000235918311461947	TRUE	kshv-miR-K12-5,kshv-miR-K12-1,kshv-miR-K12-11,kshv-miR-K12-3,kshv-miR-K12-3*,kshv-miR-K12-6-5p,kshv-miR-K12-9
NM_203341	200902_at	TR(1..1801)CDS(314..688)	9403	2015-09-01	Homo sapiens 15 kDa selenoprotein (SEP15), transcript variant 2, mRNA.	-0.49652580580767	11.9704764138342	0.00355462054498291	TRUE	kshv-miR-K12-2,kshv-miR-K12-11
NM_015423	202170_s_at,202169_s_at	TR(1..2880)CDS(147..1076)	60496	AASDHPPT	Homo sapiens aminoadipate-semialdehyde dehydrogenase-phosphopantetheinyl transferase (AASDHPPT), mRNA.	-0.608275166606865	10.3816906462740	0.00291859486096224	TRUE	kshv-miR-K12-6-3p,kshv-miR-K12-6-5p,kshv-miR-K12-4-3p,kshv-miR-K12-4-5p
NM_032859	234993_at,235348_at	TR(1..5316)CDS(266..1279)	84945	ABHD13	Homo sapiens abhydrolase domain containing 13 (ABHD13), mRNA.	-0.539304395441484	5.03533913043455	0.00156246981352672	TRUE	kshv-miR-K12-4-3p,kshv-miR-K12-4-5p
NM_198836	212186_at	TR(1..9585)CDS(192..7232)	31	ACACA	Homo sapiens acetyl-Coenzyme A carboxylase alpha (ACACA), transcript variant 3, mRNA.	-0.811392130010784	7.37625998087214	0.000915292747349067	TRUE	kshv-miR-K12-1,kshv-miR-K12-6-5p,kshv-miR-K12-9*
NM_007274	215728_s_at,208002_s_at	TR(1..1814)CDS(368..1480)	11332	ACOT7	Homo sapiens acyl-CoA thioesterase 7 (ACOT7), transcript variant hBACHa, mRNA.	-0.56749731325923	8.33314736827747	0.0492245200778417	TRUE	kshv-miR-K12-6-5p
NM_022496	218395_at	TR(1..1784)CDS(57..1247)	64431	ACTR6	Homo sapiens ARP6 actin-related protein 6 homolog (yeast) (ACTR6), mRNA.	-0.628522498048736	8.73887002160513	2.66078621405873e-05	TRUE	kshv-miR-K12-2
NM_024551	201346_at	TR(1..3982)CDS(198..1358)	79602	ADIPOR2	Homo sapiens adiponectin receptor 2 (ADIPOR2), mRNA.	-0.528351891395659	9.24931014080035	0.00622708279219589	TRUE	kshv-miR-K12-4-3p,kshv-miR-K12-7,kshv-miR-K12-4-5p
NM_000675	205013_s_at	TR(1..2590)CDS(460..1698)	135	ADORA2A	Homo sapiens adenosine A2a receptor (ADORA2A), mRNA.	-1.04941833286196	5.60875803556313	0.0100821391951901	TRUE	kshv-miR-K12-6-5p,kshv-miR-K12-9*,kshv-miR-K12-7
NM_001126	221761_at	TR(1..2775)CDS(295..1665)	159	ADSS	Homo sapiens adenylosuccinate synthase (ADSS), mRNA.	-1.18489046544585	9.86610440767593	0.00356340041373046	TRUE	kshv-miR-K12-2,kshv-miR-K12-1,kshv-miR-K12-6-5p,kshv-miR-K12-9*
NM_006412	210678_s_at,32837_at	TR(1..1576)CDS(103..939)	10555	AGPAT2	Homo sapiens 1-acylglycerol-3-phosphate O-acyltransferase 2 (lysophosphatidic acid acyltransferase, beta) (AGPAT2), transcript variant 1, mRNA.	-0.656997332789934	7.36888810501312	0.0153925682892857	TRUE	kshv-miR-K12-9*
NM_018361	232007_at,218096_at	TR(1..5535)CDS(313..1407)	55326	AGPAT5	Homo sapiens 1-acylglycerol-3-phosphate O-acyltransferase 5 (lysophosphatidic acid acyltransferase, epsilon) (AGPAT5), mRNA.	-0.958478630939247	9.81858788480558	0.000108733661102998	TRUE	kshv-miR-K12-1,kshv-miR-K12-11,kshv-miR-K12-3,kshv-miR-K12-6-5p,kshv-miR-K12-9*,kshv-miR-K12-4-5p
NM_003659	205401_at,225113_at,225108_at,225114_at	TR(1..7674)CDS(48..2024)	8540	AGPS	Homo sapiens alkylglycerone phosphate synthase (AGPS), mRNA.	-0.761815192453463	8.14746716667168	0.0200619778860967	TRUE	kshv-miR-K12-6-3p,kshv-miR-K12-1,kshv-miR-K12-6-5p,kshv-miR-K12-4-3p,kshv-miR-K12-9*,kshv-miR-K12-4-5p
NM_144497	227529_s_at,227530_at,210517_s_at	TR(1..8246)CDS(331..5385)	9590	AKAP12	Homo sapiens A kinase (PRKA) anchor protein 12 (AKAP12), transcript variant 2, mRNA.	-0.954032606744685	9.69426815068627	0.00373611972919914	TRUE	kshv-miR-K12-1,kshv-miR-K12-3,kshv-miR-K12-6-5p
NM_018064	223143_s_at,223145_s_at	TR(1..1497)CDS(525..1136)	55122	AKIRIN2	Homo sapiens akirin 2 (AKIRIN2), mRNA.	-0.57584178677858	5.15189673197163	0.0259275445112467	TRUE	kshv-miR-K12-4-3p
NM_001031806	202053_s_at,202054_s_at,210544_s_at	TR(1..3823)CDS(222..1748)	224	ALDH3A2	Homo sapiens aldehyde dehydrogenase 3 family, member A2 (ALDH3A2), transcript variant 1, mRNA.	-0.796263369985401	6.6556915774393	4.97129349644111e-06	TRUE	kshv-miR-K12-6-3p,kshv-miR-K12-1,kshv-miR-K12-11,kshv-miR-K12-3,kshv-miR-K12-6-5p
NM_001182	208950_s_at,213591_at	TR(1..3566)CDS(193..1812)	501	ALDH7A1	Homo sapiens aldehyde dehydrogenase 7 family, member A1 (ALDH7A1), mRNA.	-0.605023023395104	6.72524332891736	0.0333609031939849	TRUE	kshv-miR-K12-1,kshv-miR-K12-9*
NM_144988	1553954_at	TR(1..1057)CDS(54..704)	199857	ALG14	Homo sapiens asparagine-linked glycosylation 14 homolog (S. cerevisiae) (ALG14), mRNA.	-0.980057670064964	6.7112179137898	0.000562207570899154	TRUE	kshv-miR-K12-1
NM_138775	235610_at,235713_at	TR(1..4085)CDS(142..2136)	91801	ALKBH8	Homo sapiens alkB, alkylation repair homolog 8 (E. coli) (ALKBH8), mRNA.	-0.812849648224395	7.37824578575239	0.014762890463291	TRUE	kshv-miR-K12-1,kshv-miR-K12-3,kshv-miR-K12-9
NM_182775	222333_at,243276_at,229887_at	TR(1..3148)CDS(433..1335)	259173	ALS2CL	Homo sapiens ALS2 C-terminal like (ALS2CL), transcript variant 3, mRNA.	-0.880998193183578	4.9384392500944	0.0122816513062640	TRUE	kshv-miR-K12-1,kshv-miR-K12-6-5p,kshv-miR-K12-9*,kshv-miR-K12-9
NM_001146	205609_at,205608_s_at	TR(1..4338)CDS(469..1965)	284	ANGPT1	Homo sapiens angiopoietin 1 (ANGPT1), mRNA.	-0.747066011355993	5.74333979055343	0.0184173511976649	TRUE	kshv-miR-K12-6-3p,kshv-miR-K12-2,kshv-miR-K12-1,kshv-miR-K12-6-5p,kshv-miR-K12-4-3p
NM_015114	212201_at,212200_at	TR(1..4491)CDS(68..2884)	23141	ANKLE2	Homo sapiens ankyrin repeat and LEM domain containing 2 (ANKLE2), mRNA.	-1.09693045772126	5.91232467814247	0.00142369020471657	TRUE	kshv-miR-K12-8,kshv-miR-K12-3,kshv-miR-K12-4-3p,kshv-miR-K12-7
NM_013275	219437_s_at,234701_at,231999_at	TR(1..9326)CDS(462..8453)	29123	ANKRD11	Homo sapiens ankyrin repeat domain 11 (ANKRD11), mRNA.	-0.772832379120429	4.15298243569058	0.0248951103610586	TRUE	kshv-miR-K12-6-5p
NM_030816	1554471_a_at,238597_at,227375_at	TR(1..5682)CDS(327..1952)	81573	ANKRD13C	Homo sapiens ankyrin repeat domain 13C (ANKRD13C), mRNA.	-0.9920388328625	4.38884258559109	0.0242047545281959	TRUE	kshv-miR-K12-6-3p,kshv-miR-K12-6-5p,kshv-miR-K12-4-5p
NM_032290	223542_at,1558076_at	TR(1..3813)CDS(81..3257)	84250	ANKRD32	Homo sapiens ankyrin repeat domain 32 (ANKRD32), mRNA.	-0.818990373068245	5.87696545306039	0.00581716050552471	TRUE	kshv-miR-K12-2,kshv-miR-K12-4-3p
NM_058172	225524_at,1555536_at	TR(1..3868)CDS(527..1993)	118429	ANTXR2	Homo sapiens anthrax toxin receptor 2 (ANTXR2), mRNA.	-0.802473143013374	5.57763634131568	0.000924139448717569	TRUE	kshv-miR-K12-6-3p,kshv-miR-K12-5,kshv-miR-K12-11,kshv-miR-K12-3,kshv-miR-K12-4-3p
NM_001154	200782_at	TR(1..1624)CDS(166..1128)	308	ANXA5	Homo sapiens annexin A5 (ANXA5), mRNA.	-1.03498148981955	11.6147724302163	0.00344936066578052	TRUE	kshv-miR-K12-1
NM_001155	200982_s_at	TR(1..2915)CDS(153..2174)	309	ANXA6	Homo sapiens annexin A6 (ANXA6), transcript variant 1, mRNA.	-0.524381192587570	7.06207083471476	0.0238352032855734	TRUE	kshv-miR-K12-1,kshv-miR-K12-3
NM_001156	201366_at,209860_s_at	TR(1..2146)CDS(74..1474)	310	ANXA7	Homo sapiens annexin A7 (ANXA7), transcript variant 1, mRNA.	-0.518981008051658	10.2883293305483	0.00128504823486312	TRUE	kshv-miR-K12-2
NM_014203	234068_s_at	TR(1..3499)CDS(212..3145)	160	AP2A1	Homo sapiens adaptor-related protein complex 2, alpha 1 subunit (AP2A1), transcript variant 1, mRNA.	-1.52073084942444	4.74458818645221	6.21231178202594e-05	FALSE	kshv-miR-K12-6-5p
NM_012305	212161_at	TR(1..4616)CDS(182..3001)	161	AP2A2	Homo sapiens adaptor-related protein complex 2, alpha 2 subunit (AP2A2), mRNA.	-0.540297306670212	2.52449433629303	0.0422935720977807	TRUE	kshv-miR-K12-6-5p,kshv-miR-K12-9*,kshv-miR-K12-7
NM_001077523	210974_s_at,206592_s_at,208710_s_at	TR(1..4741)CDS(224..3562)	8943	AP3D1	Homo sapiens adaptor-related protein complex 3, delta 1 subunit (AP3D1), transcript variant 1, mRNA.	-0.610813765269637	6.76932014645254	0.00494141834621771	TRUE	kshv-miR-K12-3,kshv-miR-K12-6-5p,kshv-miR-K12-7,kshv-miR-K12-4-5p,kshv-miR-K12-9
NM_181868	204859_s_at,211554_s_at	TR(1..7075)CDS(578..4195)	317	APAF1	Homo sapiens apoptotic peptidase activating factor 1 (APAF1), transcript variant 4, mRNA.	-0.667202001246632	4.60738741574174	0.0028602576728604	TRUE	kshv-miR-K12-1,kshv-miR-K12-11,kshv-miR-K12-3,kshv-miR-K12-6-5p,kshv-miR-K12-9*,kshv-miR-K12-4-5p,kshv-miR-K12-9
NM_001163	228101_at,206679_at	TR(1..6603)CDS(277..2790)	320	APBA1	Homo sapiens amyloid beta (A4) precursor protein-binding, family A, member 1 (APBA1), mRNA.	-0.547300918077708	3.05821822772801	0.000385667480325043	TRUE	kshv-miR-K12-6-3p,kshv-miR-K12-5,kshv-miR-K12-1,kshv-miR-K12-3,kshv-miR-K12-6-5p
NM_017413	222856_at	TR(1..3125)CDS(308..541)	8862	APLN	Homo sapiens apelin (APLN), mRNA.	-1.20111813352209	8.38126263076038	0.000244991322558053	TRUE	kshv-miR-K12-6-5p,kshv-miR-K12-9*
NM_001642	211404_s_at,208703_s_at	TR(1..3727)CDS(73..2364)	334	APLP2	Homo sapiens amyloid beta (A4) precursor-like protein 2 (APLP2), mRNA.	-0.716805291201106	10.5596622747029	0.00116226691409778	TRUE	kshv-miR-K12-6-5p
NM_145343	209546_s_at	TR(1..3039)CDS(275..1519)	8542	APOL1	Homo sapiens apolipoprotein L, 1 (APOL1), transcript variant 2, mRNA.	-0.99597137401124	3.48040305039467	0.00207510842832037	FALSE	kshv-miR-K12-8,kshv-miR-K12-1,kshv-miR-K12-9*,kshv-miR-K12-4-5p
NM_014349	221087_s_at	TR(1..2444)CDS(578..1573)	80833	APOL3	Homo sapiens apolipoprotein L, 3 (APOL3), transcript variant alpha/a, mRNA.	-0.963456688117304	5.61921881767234	0.000611444010233316	TRUE	kshv-miR-K12-6-5p
NM_012096	222538_s_at,218158_s_at	TR(1..6061)CDS(148..2277)	26060	APPL1	Homo sapiens adaptor protein, phosphotyrosine interaction, PH domain and leucine zipper containing 1 (APPL1), mRNA.	-0.870266136632208	7.31771200704076	0.000663445787048701	TRUE	kshv-miR-K12-5,kshv-miR-K12-2,kshv-miR-K12-6-5p,kshv-miR-K12-9*,kshv-miR-K12-4-5p
NM_198098	207542_s_at,209047_at	TR(1..2764)CDS(58..867)	358	AQP1	Homo sapiens aquaporin 1 (Colton blood group) (AQP1), mRNA.	-0.585787619367388	2.50250993404173	0.0272726005101558	TRUE	kshv-miR-K12-6-5p,kshv-miR-K12-9
NM_001662	201526_at	TR(1..978)CDS(37..579)	381	ARF5	Homo sapiens ADP-ribosylation factor 5 (ARF5), mRNA.	-0.675164424883557	6.6455140092499	0.0169071676911208	FALSE	kshv-miR-K12-9*
NM_006421	216266_s_at,202956_at,202955_s_at	TR(1..7212)CDS(391..5940)	10565	ARFGEF1	Homo sapiens ADP-ribosylation factor guanine nucleotide-exchange factor 1(brefeldin A-inhibited) (ARFGEF1), mRNA.	-0.674697998413218	6.75105291634794	0.00414798662401698	TRUE	kshv-miR-K12-4-3p,kshv-miR-K12-4-5p,kshv-miR-K12-9
NM_014447	218230_at,214483_s_at	TR(1..2860)CDS(142..1167)	27236	ARFIP1	Homo sapiens ADP-ribosylation factor interacting protein 1 (ARFIP1), transcript variant 3, mRNA.	-0.806972940298512	7.33943944861886	0.0212377291708040	TRUE	kshv-miR-K12-2,kshv-miR-K12-11,kshv-miR-K12-3,kshv-miR-K12-4-3p
NM_014783	204492_at	TR(1..5616)CDS(723..3794)	9824	ARHGAP11A	Homo sapiens Rho GTPase activating protein 11A (ARHGAP11A), transcript variant 1, mRNA.	-0.957880965816956	6.29378657158221	0.0396429313140226	TRUE	kshv-miR-K12-5,kshv-miR-K12-11,kshv-miR-K12-9*,kshv-miR-K12-4-5p
NM_033515	225173_at,225171_at	TR(1..3503)CDS(90..2081)	93663	ARHGAP18	Homo sapiens Rho GTPase activating protein 18 (ARHGAP18), mRNA.	-0.7247657276316	10.2790653487471	0.000305846123447376	TRUE	kshv-miR-K12-1,kshv-miR-K12-11,kshv-miR-K12-6-5p,kshv-miR-K12-4-5p,kshv-miR-K12-9
NM_020824	241701_at	TR(1..7185)CDS(488..6364)	57584	ARHGAP21	Homo sapiens Rho GTPase activating protein 21 (ARHGAP21), mRNA.	-1.86150248253795	3.58995653891332	6.64325851961038e-09	FALSE	kshv-miR-K12-1,kshv-miR-K12-9
NM_015071	205068_s_at,226576_at,205069_s_at	TR(1..9041)CDS(36..2480)	23092	ARHGAP26	Homo sapiens Rho GTPase activating protein 26 (ARHGAP26), transcript variant 1, mRNA.	-0.594677522040827	3.56879793968235	4.51823666165225e-07	TRUE	kshv-miR-K12-6-3p,kshv-miR-K12-5,kshv-miR-K12-2,kshv-miR-K12-1,kshv-miR-K12-6-5p,kshv-miR-K12-9*,kshv-miR-K12-7
NM_004815	203910_at,1558280_s_at	TR(1..9121)CDS(370..4155)	9411	ARHGAP29	Homo sapiens Rho GTPase activating protein 29 (ARHGAP29), mRNA.	-1.34576596043733	8.1919660226908	1.75262337819350e-06	TRUE	kshv-miR-K12-6-3p,kshv-miR-K12-5,kshv-miR-K12-2,kshv-miR-K12-11,kshv-miR-K12-6-5p
NM_001030055	217936_at,233849_s_at,235635_at	TR(1..9604)CDS(316..4824)	394	ARHGAP5	Homo sapiens Rho GTPase activating protein 5 (ARHGAP5), transcript variant 1, mRNA.	-0.682794920596215	6.08964800647106	3.35204558697865e-06	TRUE	kshv-miR-K12-2,kshv-miR-K12-1,kshv-miR-K12-11,kshv-miR-K12-6-5p,kshv-miR-K12-4-3p
NM_014786	203756_at	TR(1..7540)CDS(16..6207)	9828	ARHGEF17	Homo sapiens Rho guanine nucleotide exchange factor (GEF) 17 (ARHGEF17), mRNA.	-0.904252688571042	3.26343317191243	0.0006981144310589	FALSE	kshv-miR-K12-2,kshv-miR-K12-9*
NM_001128616	218501_at	TR(1..4065)CDS(605..2203)	50650	ARHGEF3	Homo sapiens Rho guanine nucleotide exchange factor (GEF) 3 (ARHGEF3), transcript variant 2, mRNA.	-0.875264248661165	7.82667164861472	0.0467083215704885	TRUE	kshv-miR-K12-2,kshv-miR-K12-1,kshv-miR-K12-4-3p,kshv-miR-K12-9
NM_002892	230141_at	TR(1..5792)CDS(255..4028)	5926	ARID4A	Homo sapiens AT rich interactive domain 4A (RBP1-like) (ARID4A), transcript variant 1, mRNA.	-0.90365750550361	5.74054089805799	0.00556390907136513	TRUE	kshv-miR-K12-5,kshv-miR-K12-2,kshv-miR-K12-11
NM_031371	221230_s_at	TR(1..5809)CDS(499..4179)	51742	ARID4B	Homo sapiens AT rich interactive domain 4B (RBP1-like) (ARID4B), transcript variant 2, mRNA.	-0.548718496166525	9.15260033066164	0.00890000384760704	TRUE	kshv-miR-K12-2,kshv-miR-K12-1
NM_144996	228201_at	TR(1..3286)CDS(287..1252)	200894	ARL13B	Homo sapiens ADP-ribosylation factor-like 13B (ARL13B), transcript variant 2, mRNA.	-0.858143181761401	6.45553085011557	0.0367482682441915	TRUE	kshv-miR-K12-3,kshv-miR-K12-4-3p
NM_025047	220468_at	TR(1..1306)CDS(189..767)	80117	ARL14	Homo sapiens ADP-ribosylation factor-like 14 (ARL14), mRNA.	-1.73080725040279	3.62901283228267	6.4779236745216e-07	TRUE	kshv-miR-K12-9*,kshv-miR-K12-4-5p
NM_015161	211935_at	TR(1..2280)CDS(70..681)	23204	ARL6IP1	Homo sapiens ADP-ribosylation factor-like 6 interacting protein 1 (ARL6IP1), mRNA.	-0.650952408102486	11.9903207425210	0.000251829849723850	TRUE	kshv-miR-K12-2,kshv-miR-K12-3,kshv-miR-K12-4-3p
NM_152522	225709_at,225707_at	TR(1..1775)CDS(13..693)	151188	ARL6IP6	Homo sapiens ADP-ribosylation-like factor 6 interacting protein 6 (ARL6IP6), mRNA.	-0.518637495729895	7.11287312964889	0.00498585660020822	TRUE	kshv-miR-K12-1
NM_001024959	211672_s_at,217817_at,217818_s_at	TR(1..1557)CDS(431..667)	10093	ARPC4	Homo sapiens actin related protein 2/3 complex, subunit 4, 20kDa (ARPC4), transcript variant 2, mRNA.	-1.62525864764138	7.43250772473979	1.84407063393670e-05	TRUE	kshv-miR-K12-9*
NM_020251	222756_s_at,222912_at	TR(1..2180)CDS(223..1455)	408	ARRB1	Homo sapiens arrestin, beta 1 (ARRB1), transcript variant 2, mRNA.	-1.03740843618217	7.590301515643	2.14730831758181e-07	TRUE	kshv-miR-K12-3,kshv-miR-K12-3*,kshv-miR-K12-9*
NM_198243	219996_at	TR(1..2630)CDS(690..1646)	140460	ASB7	Homo sapiens ankyrin repeat and SOCS box-containing 7 (ASB7), transcript variant 2, mRNA.	-0.858365035792752	4.33183158037805	0.0291465552112469	TRUE	kshv-miR-K12-4-3p
NM_022091	231269_at,212815_at	TR(1..3470)CDS(330..665)	10973	ASCC3	Homo sapiens activating signal cointegrator 1 complex subunit 3 (ASCC3), transcript variant 2, mRNA.	-0.82559299967507	8.85191687079759	0.0394093281930832	TRUE	kshv-miR-K12-3,kshv-miR-K12-9
NM_014034	203428_s_at,203427_at	TR(1..2525)CDS(338..952)	25842	ASF1A	Homo sapiens ASF1 anti-silencing function 1 homolog A (S. cerevisiae) (ASF1A), mRNA.	-0.673712482044908	8.6744704454203	0.00122545128770321	TRUE	kshv-miR-K12-11,kshv-miR-K12-3
NM_018154	218115_at	TR(1..1746)CDS(173..781)	55723	ASF1B	Homo sapiens ASF1 anti-silencing function 1 homolog B (S. cerevisiae) (ASF1B), mRNA.	-1.19207313193286	7.52578117102638	0.0207532321128198	TRUE	kshv-miR-K12-6-5p
NM_014109	235266_at,228401_at,222740_at,218782_s_at	TR(1..5580)CDS(109..4281)	29028	ATAD2	Homo sapiens ATPase family, AAA domain containing 2 (ATAD2), mRNA.	-1.25172615527299	7.9423809397475	0.00623812256636708	TRUE	kshv-miR-K12-4-3p
NM_017552	213387_at,1558807_at	TR(1..8061)CDS(295..4671)	54454	ATAD2B	Homo sapiens ATPase family, AAA domain containing 2B (ATAD2B), mRNA.	-0.629773636238069	3.40848780577795	0.00242175038113771	TRUE	kshv-miR-K12-6-3p,kshv-miR-K12-11,kshv-miR-K12-4-3p
NM_001001976	234584_s_at	TR(1..2224)CDS(83..1639)	11101	ATE1	Homo sapiens arginyltransferase 1 (ATE1), transcript variant 1, mRNA.	-0.686348558412445	5.861517558874	0.0126055687739339	TRUE	kshv-miR-K12-3
NM_004849	202512_s_at,210639_s_at,202511_s_at	TR(1..3244)CDS(354..1181)	9474	ATG5	Homo sapiens ATG5 autophagy related 5 homolog (S. cerevisiae) (ATG5), mRNA.	-0.504518588635465	7.58336388755383	0.0257108901075435	TRUE	kshv-miR-K12-2,kshv-miR-K12-1,kshv-miR-K12-6-5p
NM_022374	222700_at,1553603_s_at	TR(1..3444)CDS(31..1770)	64225	ATL2	Homo sapiens atlastin GTPase 2 (ATL2), transcript variant 1, mRNA.	-0.573619000212092	6.72621837618887	0.0277988871912431	TRUE	kshv-miR-K12-1,kshv-miR-K12-4-5p
NM_173694	226785_at,242690_at	TR(1..6135)CDS(100..3498)	286410	ATP11C	Homo sapiens ATPase, class VI, type 11C (ATP11C), transcript variant 1, mRNA.	-1.25055567392282	7.18786569206033	0.000102540755392134	TRUE	kshv-miR-K12-3,kshv-miR-K12-6-5p,kshv-miR-K12-7,kshv-miR-K12-4-5p
NM_024524	219558_at,212297_at	TR(1..7384)CDS(403..4083)	79572	ATP13A3	Homo sapiens ATPase type 13A3 (ATP13A3), mRNA.	-0.558189906100353	7.28940380794084	0.0202226569970712	TRUE	kshv-miR-K12-1
NM_001001323	215716_s_at,209281_s_at,212930_at	TR(1..6950)CDS(182..3712)	490	ATP2B1	Homo sapiens ATPase, Ca++ transporting, plasma membrane 1 (ATP2B1), transcript variant 1, mRNA.	-0.972522669313958	5.24561127123318	0.00465142855912844	TRUE	kshv-miR-K12-6-3p,kshv-miR-K12-2,kshv-miR-K12-1,kshv-miR-K12-11,kshv-miR-K12-4-3p,kshv-miR-K12-9
NM_005603	226302_at	TR(1..5818)CDS(1..3756)	5205	ATP8B1	Homo sapiens ATPase, class I, type 8B, member 1 (ATP8B1), mRNA.	-0.514353804486779	9.69721671300841	0.0386033709805311	TRUE	kshv-miR-K12-5,kshv-miR-K12-1,kshv-miR-K12-9*,kshv-miR-K12-4-5p
NM_000332	203231_s_at,203232_s_at	TR(1..10636)CDS(972..3419)	6310	ATXN1	Homo sapiens ataxin 1 (ATXN1), transcript variant 1, mRNA.	-0.918251793966181	5.44857141718917	0.000380937204349825	TRUE	kshv-miR-K12-2,kshv-miR-K12-3,kshv-miR-K12-4-3p,kshv-miR-K12-9*,kshv-miR-K12-4-5p
NM_000707	208260_at	TR(1..1773)CDS(159..1433)	553	AVPR1B	Homo sapiens arginine vasopressin receptor 1B (AVPR1B), mRNA.	-0.647308567276734	2.46847313416694	0.0313649796787865	FALSE	kshv-miR-K12-9*
NM_006577	222870_s_at,219326_s_at	TR(1..2788)CDS(239..1432)	10678	B3GNT2	Homo sapiens UDP-GlcNAc:betaGal beta-1,3-N-acetylglucosaminyltransferase 2 (B3GNT2), mRNA.	-0.91811574368373	5.70668244822525	0.00629774323167864	TRUE	kshv-miR-K12-9
NM_001497	201883_s_at,216627_s_at	TR(1..4214)CDS(190..1386)	2683	B4GALT1	Homo sapiens UDP-Gal:betaGlcNAc beta 1,4- galactosyltransferase, polypeptide 1 (B4GALT1), mRNA.	-1.10026144060431	5.06458473639823	2.45052789243656e-05	TRUE	kshv-miR-K12-11,kshv-miR-K12-3,kshv-miR-K12-3*,kshv-miR-K12-6-5p
NM_004775	206233_at,206232_s_at,235333_at	TR(1..4814)CDS(298..1446)	9331	B4GALT6	Homo sapiens UDP-Gal:betaGlcNAc beta 1,4- galactosyltransferase, polypeptide 6 (B4GALT6), mRNA.	-0.783016261162637	5.69318357741248	0.000224271002740261	TRUE	kshv-miR-K12-2,kshv-miR-K12-4-3p
NM_001015049	202985_s_at,230427_s_at,202984_s_at	TR(1..5006)CDS(271..1737)	9529	BAG5	Homo sapiens BCL2-associated athanogene 5 (BAG5), transcript variant 1, mRNA.	-1.25037906976178	6.19332801905938	0.00439459491373209	TRUE	kshv-miR-K12-1,kshv-miR-K12-11,kshv-miR-K12-6-5p,kshv-miR-K12-4-3p,kshv-miR-K12-9*
NM_152618	229603_at	TR(1..3260)CDS(194..2326)	166379	BBS12	Homo sapiens Bardet-Biedl syndrome 12 (BBS12), mRNA.	-0.739401725763127	3.48273498246094	0.000249171789473695	TRUE	kshv-miR-K12-9
NM_176824	219688_at,235007_at	TR(1..3718)CDS(175..2322)	55212	BBS7	Homo sapiens Bardet-Biedl syndrome 7 (BBS7), transcript variant 1, mRNA.	-0.51190919038112	6.2172738916808	0.0048179740153663	TRUE	kshv-miR-K12-11,kshv-miR-K12-9*
NM_183050	210653_s_at,213321_at	TR(1..3712)CDS(68..1246)	594	BCKDHB	Homo sapiens branched chain keto acid dehydrogenase E1, beta polypeptide (BCKDHB), nuclear gene encoding mitochondrial protein, transcript variant 1, mRNA.	-0.95894557113649	4.93265649486408	0.00735482612540468	TRUE	kshv-miR-K12-8,kshv-miR-K12-6-3p,kshv-miR-K12-1,kshv-miR-K12-6-5p,kshv-miR-K12-4-3p,kshv-miR-K12-9*
NM_003921	205263_at	TR(1..3271)CDS(706..1407)	8915	BCL10	Homo sapiens B-cell CLL/lymphoma 10 (BCL10), mRNA.	-0.908317009395262	9.6420859680243	0.00101148222845475	TRUE	kshv-miR-K12-1,kshv-miR-K12-11,kshv-miR-K12-9*
NM_138621	225606_at,1553096_s_at,222343_at,1553088_a_at,1558143_a_at,208536_s_at	TR(1..5099)CDS(289..885)	10018	BCL2L11	Homo sapiens BCL2-like 11 (apoptosis facilitator) (BCL2L11), transcript variant 1, mRNA.	-1.20900171226805	5.15345712997131	0.00162680789768979	TRUE	kshv-miR-K12-5,kshv-miR-K12-1,kshv-miR-K12-6-5p,kshv-miR-K12-4-3p,kshv-miR-K12-9*,kshv-miR-K12-9
NM_001003800	212702_s_at,209203_s_at,1553021_s_at,213154_s_at	TR(1..6433)CDS(58..2625)	23299	BICD2	Homo sapiens bicaudal D homolog 2 (Drosophila) (BICD2), transcript variant 1, mRNA.	-0.537473628861959	5.82539921717247	0.00602713775745767	TRUE	kshv-miR-K12-2,kshv-miR-K12-3,kshv-miR-K12-6-5p,kshv-miR-K12-4-3p,kshv-miR-K12-9*
NM_139343	210202_s_at	TR(1..2637)CDS(346..2127)	274	BIN1	Homo sapiens bridging integrator 1 (BIN1), transcript variant 1, mRNA.	-1.33481896777125	8.15874128002526	0.00772411379786974	TRUE	kshv-miR-K12-6-5p
NM_001204	209920_at,210214_s_at,231873_at,238516_at,225144_at	TR(1..12086)CDS(1149..4265)	659	BMPR2	Homo sapiens bone morphogenetic protein receptor, type II (serine/threonine kinase) (BMPR2), mRNA.	-0.84487721210046	6.30580424071817	0.0326923588995935	TRUE	kshv-miR-K12-8,kshv-miR-K12-6-3p,kshv-miR-K12-1,kshv-miR-K12-3,kshv-miR-K12-9*,kshv-miR-K12-9
NM_000059	208368_s_at,214727_at	TR(1..11386)CDS(228..10484)	675	BRCA2	Homo sapiens breast cancer 2, early onset (BRCA2), mRNA.	-1.59929847174917	5.4432956675916	0.0335099560465422	TRUE	kshv-miR-K12-1,kshv-miR-K12-4-5p
NM_032352	226580_at,224484_s_at	TR(1..2604)CDS(127..1098)	84312	BRMS1L	Homo sapiens breast cancer metastasis-suppressor 1-like (BRMS1L), mRNA.	-0.781773481907882	8.41234690466906	0.00699042101626053	TRUE	kshv-miR-K12-3,kshv-miR-K12-6-5p,kshv-miR-K12-4-3p,kshv-miR-K12-9
NM_001007246	231960_at,219280_at,214820_at,1553227_s_at,231860_at	TR(1..2488)CDS(140..502)	54014	BRWD1	Homo sapiens bromodomain and WD repeat domain containing 1 (BRWD1), transcript variant 3, mRNA.	-0.559559150356877	3.60152265716639	0.0190476236468843	TRUE	kshv-miR-K12-11,kshv-miR-K12-3,kshv-miR-K12-6-5p,kshv-miR-K12-4-3p,kshv-miR-K12-4-5p
NM_198591	208677_s_at	TR(1..1609)CDS(224..841)	682	BSG	Homo sapiens basigin (Ok blood group) (BSG), transcript variant 4, mRNA.	-1.27979539805586	10.1250210110957	7.24340478790691e-05	TRUE	kshv-miR-K12-6-5p
NM_004336	215509_s_at,209642_at	TR(1..3509)CDS(113..3370)	699	BUB1	Homo sapiens budding uninhibited by benzimidazoles 1 homolog (yeast) (BUB1), mRNA.	-1.08080979152269	7.34661818287363	0.0312020462415941	TRUE	kshv-miR-K12-1
NM_004725	201456_s_at,209974_s_at,201458_s_at	TR(1..2782)CDS(243..1229)	9184	BUB3	Homo sapiens budding uninhibited by benzimidazoles 3 homolog (yeast) (BUB3), transcript variant 1, mRNA.	-0.694844035580828	10.5884455454306	0.00183099029383653	TRUE	kshv-miR-K12-2,kshv-miR-K12-1,kshv-miR-K12-11,kshv-miR-K12-4-3p
NM_017782	238795_at,218331_s_at	TR(1..9866)CDS(626..7918)	54906	C10orf18	Homo sapiens chromosome 10 open reading frame 18 (C10orf18), mRNA.	-0.625263856094073	7.20084140456944	0.0166551972415729	TRUE	kshv-miR-K12-2,kshv-miR-K12-9*,kshv-miR-K12-4-5p
NM_031465	225836_s_at,225837_at	TR(1..1872)CDS(145..861)	83695	C12orf32	Homo sapiens chromosome 12 open reading frame 32 (C12orf32), mRNA.	-0.797168589216012	7.85672981295205	0.0257208712748866	TRUE	kshv-miR-K12-6-5p,kshv-miR-K12-9*
NM_017822	221821_s_at	TR(1..2402)CDS(76..1554)	54934	C12orf41	Homo sapiens chromosome 12 open reading frame 41 (C12orf41), mRNA.	-0.592593988245077	7.58803952166221	0.000756902838903018	TRUE	kshv-miR-K12-4-5p
NM_017915	220060_s_at,227928_at	TR(1..3189)CDS(464..1960)	55010	C12orf48	Homo sapiens chromosome 12 open reading frame 48 (C12orf48), mRNA.	-0.790025536475913	7.07176188572113	0.0075078155078495	TRUE	kshv-miR-K12-2,kshv-miR-K12-1,kshv-miR-K12-4-3p,kshv-miR-K12-9*
NM_016475	223547_at,223215_s_at	TR(1..2377)CDS(148..1083)	51528	C14orf100	Homo sapiens chromosome 14 open reading frame 100 (C14orf100), transcript variant 1, mRNA.	-0.539827024229436	8.86357319042417	0.0115820436126738	TRUE	kshv-miR-K12-2,kshv-miR-K12-1,kshv-miR-K12-3,kshv-miR-K12-4-3p
NM_018139	219166_at	TR(1..2976)CDS(82..2595)	55172	C14orf104	Homo sapiens chromosome 14 open reading frame 104 (C14orf104), transcript variant 1, mRNA.	-1.94697954708447	9.41024478802754	1.28704001630036e-06	TRUE	kshv-miR-K12-1
NM_018353	206500_s_at,226630_at	TR(1..4792)CDS(460..3858)	55320	C14orf106	Homo sapiens chromosome 14 open reading frame 106 (C14orf106), mRNA.	-1.83700068922411	7.33178586715556	0.000326390398302184	TRUE	kshv-miR-K12-1
NM_018229	218139_s_at,222531_s_at	TR(1..3088)CDS(407..1879)	55745	C14orf108	Homo sapiens chromosome 14 open reading frame 108 (C14orf108), mRNA.	-0.775655161134414	8.30926064028894	0.00468425001030170	TRUE	kshv-miR-K12-6-3p,kshv-miR-K12-11
NM_022495	219972_s_at	TR(1..3952)CDS(523..3339)	64430	C14orf135	Homo sapiens chromosome 14 open reading frame 135 (C14orf135), mRNA.	-0.812722110815869	8.42752208929914	0.046793243166377	TRUE	kshv-miR-K12-5,kshv-miR-K12-3
NM_152446	232635_at,233859_at,244033_at	TR(1..4461)CDS(172..3456)	145508	C14orf145	Homo sapiens chromosome 14 open reading frame 145 (C14orf145), mRNA.	-0.77744062858526	3.55378919242775	0.0121793345599010	TRUE	kshv-miR-K12-1
NM_138288	212460_at,213508_at	TR(1..2538)CDS(56..271)	171546	C14orf147	Homo sapiens chromosome 14 open reading frame 147 (C14orf147), mRNA.	-0.490264899312788	8.7356237230558	0.00252514508297976	TRUE	kshv-miR-K12-6-3p,kshv-miR-K12-11,kshv-miR-K12-9*,kshv-miR-K12-7
NM_001043318	225980_at,235430_at	TR(1..7656)CDS(340..3477)	91748	C14orf43	Homo sapiens chromosome 14 open reading frame 43 (C14orf43), transcript variant 2, mRNA.	-0.766462283571688	4.57256179801535	0.00543157251753082	TRUE	kshv-miR-K12-8,kshv-miR-K12-5,kshv-miR-K12-6-5p,kshv-miR-K12-9*,kshv-miR-K12-7
NM_144597	1552310_at	TR(1..1405)CDS(81..461)	123207	C15orf40	Homo sapiens chromosome 15 open reading frame 40 (C15orf40), mRNA.	-1.76130232050376	6.06276340279644	0.00045648613846335	TRUE	kshv-miR-K12-1,kshv-miR-K12-3,kshv-miR-K12-9*
NM_207445	1562367_at	TR(1..3041)CDS(335..886)	400360	C15orf54	Homo sapiens chromosome 15 open reading frame 54 (C15orf54), mRNA.	-1.78895840392079	8.23862698021686	8.2549036697868e-05	TRUE	kshv-miR-K12-4-3p
NM_033201	212736_at	TR(1..2032)CDS(187..801)	89927	C16orf45	Homo sapiens chromosome 16 open reading frame 45 (C16orf45), mRNA.	-0.764263670803956	6.79289598494253	0.000281464139421401	TRUE	kshv-miR-K12-1
NM_025187	223440_at	TR(1..2943)CDS(165..1433)	80262	C16orf70	Homo sapiens chromosome 16 open reading frame 70 (C16orf70), mRNA.	-0.855333451668415	6.48973737906778	0.0290269855057391	TRUE	kshv-miR-K12-3,kshv-miR-K12-9*
NM_152308	226456_at	TR(1..1462)CDS(19..462)	116028	C16orf75	Homo sapiens chromosome 16 open reading frame 75 (C16orf75), mRNA.	-1.24426760017727	8.2527297623041	0.00333583893918243	TRUE	kshv-miR-K12-4-3p
NM_022344	203830_at	TR(1..1631)CDS(32..1222)	64149	C17orf75	Homo sapiens chromosome 17 open reading frame 75 (C17orf75), mRNA.	-0.655858846005818	6.86661729872884	0.00526626118092114	TRUE	kshv-miR-K12-4-5p
NM_001114118	222779_s_at,218896_s_at	TR(1..3764)CDS(24..1886)	55421	C17orf85	Homo sapiens chromosome 17 open reading frame 85 (C17orf85), transcript variant 1, mRNA.	-0.824507637400828	5.58611176274366	0.000505852730147288	TRUE	kshv-miR-K12-3,kshv-miR-K12-4-3p
NM_014177	223180_s_at,223181_at	TR(1..1562)CDS(299..1045)	29090	C18orf55	Homo sapiens chromosome 18 open reading frame 55 (C18orf55), mRNA.	-1.09801981448877	8.15771346138018	0.000205631718160489	TRUE	kshv-miR-K12-2,kshv-miR-K12-3
NM_018372	220235_s_at	TR(1..3349)CDS(257..2566)	55791	C1orf103	Homo sapiens chromosome 1 open reading frame 103 (C1orf103), transcript variant 1, mRNA.	-1.10541047961656	9.17172292851706	0.00182940416156310	TRUE	kshv-miR-K12-1,kshv-miR-K12-11
NM_207356	222000_at,238010_at	TR(1..1697)CDS(100..831)	339448	C1orf174	Homo sapiens chromosome 1 open reading frame 174 (C1orf174), mRNA.	-1.16218316312252	6.96280522796046	0.000180213845100198	TRUE	kshv-miR-K12-6-3p,kshv-miR-K12-6-5p,kshv-miR-K12-9*,kshv-miR-K12-4-5p
NM_001212	208910_s_at	TR(1..1163)CDS(79..927)	708	C1QBP	Homo sapiens complement component 1, q subcomponent binding protein (C1QBP), nuclear gene encoding mitochondrial protein, mRNA.	-0.560603616749655	12.4316435918338	6.21851304227081e-06	TRUE	kshv-miR-K12-5
NM_018944	228597_at,219004_s_at	TR(1..1587)CDS(52..753)	54069	C21orf45	Homo sapiens chromosome 21 open reading frame 45 (C21orf45), mRNA.	-0.640508581161933	7.00075238273467	0.000294905884873118	TRUE	kshv-miR-K12-6-3p,kshv-miR-K12-3
NM_058191	1555125_at,218515_at,221158_at	TR(1..2530)CDS(191..1600)	94104	C21orf66	Homo sapiens chromosome 21 open reading frame 66 (C21orf66), transcript variant 4, mRNA.	-0.70425552856124	6.25812825355932	0.0411022110278292	TRUE	kshv-miR-K12-6-3p,kshv-miR-K12-6-5p,kshv-miR-K12-4-3p
NM_024766	219617_at	TR(1..1611)CDS(105..1076)	79823	C2orf34	Homo sapiens chromosome 2 open reading frame 34 (C2orf34), mRNA.	-1.19668958539574	3.61818617542267	0.0103277120746436	TRUE	kshv-miR-K12-1,kshv-miR-K12-9
NM_198562	241817_at	TR(1..3590)CDS(204..1007)	375341	C3orf62	Homo sapiens chromosome 3 open reading frame 62 (C3orf62), mRNA.	-0.93309485907487	2.87839282627837	0.0104570573258741	TRUE	kshv-miR-K12-5,kshv-miR-K12-3,kshv-miR-K12-9
NM_024511	210054_at	TR(1..5620)CDS(231..2042)	79441	C4orf15	Homo sapiens chromosome 4 open reading frame 15 (C4orf15), mRNA.	-0.690456437869394	8.28762786565613	0.0444457895212172	TRUE	kshv-miR-K12-3,kshv-miR-K12-4-3p,kshv-miR-K12-9,kshv-miR-K12-6-3p,kshv-miR-K12-11,kshv-miR-K12-1,kshv-miR-K12-7,kshv-miR-K12-9*
NM_001128426	219023_at	TR(1..2812)CDS(354..1163)	55435	C4orf16	Homo sapiens chromosome 4 open reading frame 16 (C4orf16), transcript variant 2, mRNA.	-1.19137454448596	7.26262069853322	0.00539221939531104	TRUE	kshv-miR-K12-2,kshv-miR-K12-11
NM_001039717	219980_at	TR(1..2200)CDS(319..1563)	80167	C4orf29	Homo sapiens chromosome 4 open reading frame 29 (C4orf29), mRNA.	-0.940494654620365	4.23879361409086	0.00354557736767828	TRUE	kshv-miR-K12-1,kshv-miR-K12-3,kshv-miR-K12-4-5p
NM_017741	228106_at,239187_at,219717_at	TR(1..4548)CDS(1062..1712)	54876	C4orf30	Homo sapiens chromosome 4 open reading frame 30 (C4orf30), mRNA.	-0.734827564683765	5.659782166897	0.0155755675261894	TRUE	kshv-miR-K12-1,kshv-miR-K12-11,kshv-miR-K12-3,kshv-miR-K12-6-5p,kshv-miR-K12-4-3p,kshv-miR-K12-9*,kshv-miR-K12-4-5p
NM_152400	227856_at	TR(1..2730)CDS(185..583)	132720	C4orf32	Homo sapiens chromosome 4 open reading frame 32 (C4orf32), mRNA.	-0.92165998261802	9.5102117396727	0.00272623755391342	TRUE	kshv-miR-K12-9
NM_018352	218513_at	TR(1..1923)CDS(282..893)	55319	C4orf43	Homo sapiens chromosome 4 open reading frame 43 (C4orf43), mRNA.	-0.926829842195852	7.73233577956231	0.0124455651909132	TRUE	kshv-miR-K12-3,kshv-miR-K12-9*,kshv-miR-K12-4-5p
NM_001008393	238015_at,235088_at	TR(1..3525)CDS(250..591)	201725	C4orf46	Homo sapiens chromosome 4 open reading frame 46 (C4orf46), mRNA.	-1.01103436526026	7.83903944509301	0.0393737218793041	TRUE	kshv-miR-K12-5,kshv-miR-K12-4-3p,kshv-miR-K12-4-5p
NM_001093755	218674_at	TR(1..3120)CDS(331..1587)	80006	C5orf44	Homo sapiens chromosome 5 open reading frame 44 (C5orf44), transcript variant 1, mRNA.	-1.63433714036185	4.58609587542608	0.00049260062106779	TRUE	kshv-miR-K12-1,kshv-miR-K12-11,kshv-miR-K12-4-3p,kshv-miR-K12-9*
NM_030939	208809_s_at	TR(1..2424)CDS(519..1208)	81688	C6orf62	Homo sapiens chromosome 6 open reading frame 62 (C6orf62), mRNA.	-0.716329510516957	8.97323558220466	0.0077876534579718	TRUE	kshv-miR-K12-5,kshv-miR-K12-3,kshv-miR-K12-4-3p
NM_001134396	224478_s_at	TR(1..1282)CDS(42..626)	84310	C7orf50	Homo sapiens chromosome 7 open reading frame 50 (C7orf50), transcript variant 3, mRNA.	-0.568486475988604	6.3338487177263	0.00507041521054815	TRUE	kshv-miR-K12-1,kshv-miR-K12-7
NM_152416	230016_at,235509_at	TR(1..1808)CDS(17..1018)	137682	C8orf38	Homo sapiens chromosome 8 open reading frame 38 (C8orf38), mRNA.	-0.713510668050346	5.55769305887322	0.0159903599225199	TRUE	kshv-miR-K12-11,kshv-miR-K12-6-5p
NM_147202	225146_at	TR(1..3641)CDS(308..814)	203259	C9orf25	Homo sapiens chromosome 9 open reading frame 25 (C9orf25), mRNA.	-0.889283612791228	6.77619560557025	0.000488949825617586	TRUE	kshv-miR-K12-6-3p,kshv-miR-K12-3,kshv-miR-K12-6-5p,kshv-miR-K12-7,kshv-miR-K12-9
NM_032823	212848_s_at	TR(1..2834)CDS(176..2338)	84909	C9orf3	Homo sapiens chromosome 9 open reading frame 3 (C9orf3), mRNA.	-1.88552482611260	7.02788362519988	0.00371038344199578	TRUE	kshv-miR-K12-6-5p
NM_006888	213688_at,211984_at,200655_s_at,211985_s_at	TR(1..4201)CDS(203..652)	801	CALM1	Homo sapiens calmodulin 1 (phosphorylase kinase, delta) (CALM1), mRNA.	-0.930404117673031	7.89368427050664	0.00909224051300871	TRUE	kshv-miR-K12-6-3p,kshv-miR-K12-5,kshv-miR-K12-1,kshv-miR-K12-6-5p,kshv-miR-K12-9*,kshv-miR-K12-4-5p
NM_033429	64408_s_at,1568600_at,221879_at	TR(1..4655)CDS(735..1325)	91860	CALML4	Homo sapiens calmodulin-like 4 (CALML4), transcript variant 1, mRNA.	-0.844069353714178	5.5946618332101	0.0145377073947281	TRUE	kshv-miR-K12-6-3p,kshv-miR-K12-9*,kshv-miR-K12-9
NM_203459	212765_at,217196_s_at,212763_at	TR(1..7359)CDS(271..4707)	23271	CAMSAP1L1	Homo sapiens calmodulin regulated spectrin-associated protein 1-like 1 (CAMSAP1L1), mRNA.	-0.496078543650312	6.33109897097103	0.0254463652300532	TRUE	kshv-miR-K12-2,kshv-miR-K12-1,kshv-miR-K12-3,kshv-miR-K12-4-3p
NM_018448	208839_s_at,208838_at,207483_s_at	TR(1..5956)CDS(438..4130)	55832	CAND1	Homo sapiens cullin-associated and neddylation-dissociated 1 (CAND1), mRNA.	-0.743385664568452	9.47245722433017	0.00120863213334124	TRUE	kshv-miR-K12-1
NM_014316	218384_at,224910_at	TR(1..2727)CDS(49..492)	23589	CARHSP1	Homo sapiens calcium regulated heat stable protein 1, 24kDa (CARHSP1), transcript variant 1, mRNA.	-1.33376010869577	7.30356778497408	0.00103476823740579	TRUE	kshv-miR-K12-6-3p,kshv-miR-K12-5,kshv-miR-K12-1,kshv-miR-K12-11,kshv-miR-K12-4-3p,kshv-miR-K12-9*
NM_003688	207620_s_at,211208_s_at,238699_s_at,227156_at	TR(1..8298)CDS(47..2812)	8573	CASK	Homo sapiens calcium/calmodulin-dependent serine protein kinase (MAGUK family) (CASK), transcript variant 1, mRNA.	-1.66129675459035	5.51679957570637	2.37872545384885e-07	TRUE	kshv-miR-K12-6-3p,kshv-miR-K12-5,kshv-miR-K12-1,kshv-miR-K12-3,kshv-miR-K12-6-5p,kshv-miR-K12-4-5p
NM_032983	209811_at,34449_at,226032_at,211140_s_at,208050_s_at	TR(1..3927)CDS(148..474)	835	CASP2	Homo sapiens caspase 2, apoptosis-related cysteine peptidase (CASP2), transcript variant 3, mRNA.	-0.880449261982385	4.11509884458779	0.00137785927811031	TRUE	kshv-miR-K12-6-3p,kshv-miR-K12-1,kshv-miR-K12-6-5p,kshv-miR-K12-9*
NM_032991	202763_at	TR(1..2522)CDS(97..930)	836	CASP3	Homo sapiens caspase 3, apoptosis-related cysteine peptidase (CASP3), transcript variant beta, mRNA.	-0.724042956777076	9.09895245617047	0.045284940659883	TRUE	kshv-miR-K12-1,kshv-miR-K12-3,kshv-miR-K12-4-3p
NM_001080124	213373_s_at,1553306_at,207686_s_at	TR(1..2750)CDS(236..1630)	841	CASP8	Homo sapiens caspase 8, apoptosis-related cysteine peptidase (CASP8), transcript variant F, mRNA.	-1.20617001156946	5.67197144850473	2.29920802039871e-07	TRUE	kshv-miR-K12-8,kshv-miR-K12-4-3p,kshv-miR-K12-9*
NM_001229	203984_s_at	TR(1..2034)CDS(96..1346)	842	CASP9	Homo sapiens caspase 9, apoptosis-related cysteine peptidase (CASP9), transcript variant alpha, mRNA.	-0.53447052207908	6.82079938890007	0.000394198529228091	TRUE	kshv-miR-K12-11
NM_001753	212097_at,203065_s_at	TR(1..2704)CDS(279..815)	857	CAV1	Homo sapiens caveolin 1, caveolae protein, 22kDa (CAV1), mRNA.	-0.527166797453278	12.9953548777974	2.90050488041672e-05	TRUE	kshv-miR-K12-6-3p,kshv-miR-K12-1
NM_005188	225231_at,243475_at,225234_at,229010_at,206607_at	TR(1..11242)CDS(139..2859)	867	CBL	Homo sapiens Cas-Br-M (murine) ecotropic retroviral transforming sequence (CBL), mRNA.	-0.574305563119884	4.91570217265081	0.000128785690876634	TRUE	kshv-miR-K12-3,kshv-miR-K12-4-3p,kshv-miR-K12-9,kshv-miR-K12-11,kshv-miR-K12-1,kshv-miR-K12-6-5p,kshv-miR-K12-4-5p,kshv-miR-K12-7,kshv-miR-K12-9*
NM_032783	244052_at,213626_at	TR(1..3474)CDS(183..896)	84869	CBR4	Homo sapiens carbonyl reductase 4 (CBR4), mRNA.	-0.584911463191924	8.5021184910467	0.0461655887438648	TRUE	kshv-miR-K12-2,kshv-miR-K12-11,kshv-miR-K12-3,kshv-miR-K12-6-5p,kshv-miR-K12-4-5p
NM_001127322	209715_at,234990_at,231862_at,226085_at	TR(1..11723)CDS(319..894)	23468	CBX5	Homo sapiens chromobox homolog 5 (HP1 alpha homolog, Drosophila) (CBX5), transcript variant 1, mRNA.	-0.800580481471974	7.0731531563248	0.00210459661786559	TRUE	kshv-miR-K12-3,kshv-miR-K12-9,kshv-miR-K12-11,kshv-miR-K12-1,kshv-miR-K12-6-5p,kshv-miR-K12-4-5p,kshv-miR-K12-7,kshv-miR-K12-9*
NM_173510	235330_at,225644_at	TR(1..3999)CDS(177..1016)	150275	CCDC117	Homo sapiens coiled-coil domain containing 117 (CCDC117), mRNA.	-0.744394160099504	4.80995401479727	0.000195358867636818	TRUE	kshv-miR-K12-5,kshv-miR-K12-2,kshv-miR-K12-4-3p,kshv-miR-K12-9*,kshv-miR-K12-9
NM_001042399	219644_at	TR(1..3182)CDS(534..2639)	51134	CCDC41	Homo sapiens coiled-coil domain containing 41 (CCDC41), transcript variant 2, mRNA.	-1.62258102373648	5.87518013742185	0.00260892952293	TRUE	kshv-miR-K12-11,kshv-miR-K12-3
NM_020198	217814_at,222432_s_at	TR(1..3445)CDS(337..1788)	57003	CCDC47	Homo sapiens coiled-coil domain containing 47 (CCDC47), mRNA.	-0.78422264057043	9.64908509192938	0.00186891089293491	TRUE	kshv-miR-K12-1,kshv-miR-K12-6-5p
NM_174908	226713_at,235051_at,228693_at,236831_at,225331_at	TR(1..8421)CDS(591..1511)	152137	CCDC50	Homo sapiens coiled-coil domain containing 50 (CCDC50), transcript variant 1, mRNA.	-0.544578268727345	7.40770485225259	0.0444979942531688	TRUE	kshv-miR-K12-1,kshv-miR-K12-11,kshv-miR-K12-3,kshv-miR-K12-4-3p,kshv-miR-K12-9*,kshv-miR-K12-4-5p,kshv-miR-K12-9
NM_174931	1559893_at	TR(1..1257)CDS(146..925)	253635	CCDC75	Homo sapiens coiled-coil domain containing 75 (CCDC75), mRNA.	-0.940406588666825	3.98583232950333	8.07059279913625e-05	TRUE	kshv-miR-K12-4-5p
NM_019083	219130_at	TR(1..3129)CDS(7..1452)	54482	CCDC76	Homo sapiens coiled-coil domain containing 76 (CCDC76), mRNA.	-0.770776847398542	7.9639845808463	0.00142939502764157	TRUE	kshv-miR-K12-4-3p
NM_053056	208712_at,208711_s_at	TR(1..4304)CDS(210..1097)	595	CCND1	Homo sapiens cyclin D1 (CCND1), mRNA.	-1.01264298858713	10.6439860034366	0.000240077443308922	TRUE	kshv-miR-K12-6-3p,kshv-miR-K12-2,kshv-miR-K12-11,kshv-miR-K12-3,kshv-miR-K12-4-3p,kshv-miR-K12-9
NM_057749	211814_s_at,205034_at	TR(1..2748)CDS(110..1324)	9134	CCNE2	Homo sapiens cyclin E2 (CCNE2), mRNA.	-1.90991849031027	6.35172520536585	0.034869882544922	TRUE	kshv-miR-K12-2
NM_001761	204827_s_at,204826_at	TR(1..4287)CDS(89..2449)	899	CCNF	Homo sapiens cyclin F (CCNF), mRNA.	-0.694212045903884	6.11338864776335	0.00616902842990589	TRUE	kshv-miR-K12-3,kshv-miR-K12-6-5p,kshv-miR-K12-9*,kshv-miR-K12-4-5p
NM_001241	214638_s_at,204645_at	TR(1..4513)CDS(33..2024)	905	CCNT2	Homo sapiens cyclin T2 (CCNT2), transcript variant a, mRNA.	-0.579376233893655	6.69614173292265	0.00849939572830517	TRUE	kshv-miR-K12-2,kshv-miR-K12-1,kshv-miR-K12-11,kshv-miR-K12-3,kshv-miR-K12-6-5p,kshv-miR-K12-4-3p,kshv-miR-K12-7,kshv-miR-K12-4-5p
NM_001009186	201326_at	TR(1..2547)CDS(165..1625)	908	CCT6A	Homo sapiens chaperonin containing TCP1, subunit 6A (zeta 1) (CCT6A), transcript variant 2, mRNA.	-0.747920038572456	10.2358204360490	4.92944013112385e-05	TRUE	kshv-miR-K12-1,kshv-miR-K12-4-5p
NM_152854	205153_s_at,35150_at,215346_at	TR(1..1554)CDS(78..689)	958	CD40	Homo sapiens CD40 molecule, TNF receptor superfamily member 5 (CD40), transcript variant 2, mRNA.	-1.18794396752324	5.87391610598905	0.000342393183241621	TRUE	kshv-miR-K12-6-5p
NM_001025079	211075_s_at,226016_at,213857_s_at,213055_at,227259_at	TR(1..5313)CDS(181..1119)	961	CD47	Homo sapiens CD47 molecule (CD47), transcript variant 3, mRNA.	-0.650839960760329	8.49516725275173	0.00332421188808236	TRUE	kshv-miR-K12-2,kshv-miR-K12-4-3p,kshv-miR-K12-9,kshv-miR-K12-6-3p,kshv-miR-K12-11,kshv-miR-K12-1,kshv-miR-K12-6-5p,kshv-miR-K12-4-5p
NM_001252	206508_at	TR(1..913)CDS(151..732)	970	CD70	Homo sapiens CD70 molecule (CD70), mRNA.	-0.684778511070183	6.78641696377722	0.00562170092743614	TRUE	kshv-miR-K12-6-5p
NM_012072	202877_s_at,202878_s_at	TR(1..6701)CDS(149..2107)	22918	CD93	Homo sapiens CD93 molecule (CD93), mRNA.	-0.846903549367704	8.90226172276751	6.96024783864367e-06	TRUE	kshv-miR-K12-5,kshv-miR-K12-2,kshv-miR-K12-1,kshv-miR-K12-3,kshv-miR-K12-6-5p,kshv-miR-K12-9*,kshv-miR-K12-7,kshv-miR-K12-4-5p
NM_001130829	203213_at,210559_s_at	TR(1..1943)CDS(162..1055)	983	CDC2	Homo sapiens cell division cycle 2, G1 to S and G2 to M (CDC2), transcript variant 3, mRNA.	-0.78003936898077	10.9896268003397	0.0458172121283365	TRUE	kshv-miR-K12-1,kshv-miR-K12-4-3p
NM_031267	207318_s_at,207319_s_at	TR(1..5216)CDS(283..4641)	8621	CDC2L5	Homo sapiens cell division cycle 2-like 5 (cholinesterase-related cell division controller) (CDC2L5), transcript variant 2, mRNA.	-0.530761732663011	5.40671474263385	0.0213939320051518	TRUE	kshv-miR-K12-4-3p
NM_015891	203377_s_at	TR(1..3866)CDS(25..1764)	51362	CDC40	Homo sapiens cell division cycle 40 homolog (S. cerevisiae) (CDC40), mRNA.	-0.802400527126383	6.22025605437004	0.0448084513128998	TRUE	kshv-miR-K12-1,kshv-miR-K12-11,kshv-miR-K12-3,kshv-miR-K12-6-5p,kshv-miR-K12-9*,kshv-miR-K12-7
NM_001791	210232_at,214230_at	TR(1..2182)CDS(167..742)	998	CDC42	Homo sapiens cell division cycle 42 (GTP binding protein, 25kDa) (CDC42), transcript variant 1, mRNA.	-1.34495213457735	4.13200743218732	0.0075624170664736	TRUE	kshv-miR-K12-9*
NM_020240	1552612_at,1552613_s_at,224709_s_at	TR(1..3667)CDS(613..867)	56990	CDC42SE2	Homo sapiens CDC42 small effector 2 (CDC42SE2), transcript variant 1, mRNA.	-0.650261368165253	7.02453872480312	0.00284682415060595	TRUE	kshv-miR-K12-1,kshv-miR-K12-11,kshv-miR-K12-3,kshv-miR-K12-7,kshv-miR-K12-4-5p
NM_001254	203968_s_at,203967_at	TR(1..3053)CDS(211..1893)	990	CDC6	Homo sapiens cell division cycle 6 homolog (S. cerevisiae) (CDC6), mRNA.	-1.01774108668681	7.35033382721932	0.00469899007975772	TRUE	kshv-miR-K12-2,kshv-miR-K12-11,kshv-miR-K12-3,kshv-miR-K12-9*
NM_001134419	204510_at	TR(1..3188)CDS(132..1856)	8317	CDC7	Homo sapiens cell division cycle 7 homolog (S. cerevisiae) (CDC7), transcript variant 2, mRNA.	-0.957145035596943	6.36430845078726	0.00950555174093505	TRUE	kshv-miR-K12-6-5p
NM_031942	224428_s_at	TR(1..2839)CDS(132..1484)	83879	CDCA7	Homo sapiens cell division cycle associated 7 (CDCA7), transcript variant 1, mRNA.	-0.623842900603145	8.51130565649691	0.0187391908729461	TRUE	kshv-miR-K12-11,kshv-miR-K12-4-5p
NM_004061	207149_at	TR(1..4345)CDS(1088..3472)	1010	CDH12	Homo sapiens cadherin 12, type 2 (N-cadherin 2) (CDH12), mRNA.	-1.48282944056654	4.31100692575577	2.06975942376290e-06	TRUE	kshv-miR-K12-5,kshv-miR-K12-2
NM_001261	236023_at,203198_at	TR(1..2472)CDS(124..1242)	1025	CDK9	Homo sapiens cyclin-dependent kinase 9 (CDK9), mRNA.	-0.821559413490157	5.09382031657306	0.00707132403126504	TRUE	kshv-miR-K12-6-5p,kshv-miR-K12-9*,kshv-miR-K12-7
NM_017774	220039_s_at	TR(1..2408)CDS(175..1914)	54901	CDKAL1	Homo sapiens CDK5 regulatory subunit associated protein 1-like 1 (CDKAL1), mRNA.	-0.942196752852092	2.78823692150161	8.4514169842164e-06	TRUE	kshv-miR-K12-4-5p
NM_030928	209832_s_at	TR(1..2742)CDS(55..1695)	81620	CDT1	Homo sapiens chromatin licensing and DNA replication factor 1 (CDT1), mRNA.	-0.9867569245995	6.48829676788223	0.00195378466804829	TRUE	kshv-miR-K12-1,kshv-miR-K12-6-5p,kshv-miR-K12-9*
NM_022145	222848_at	TR(1..1781)CDS(213..1022)	64105	CENPK	Homo sapiens centromere protein K (CENPK), mRNA.	-0.873635673660186	9.54550800817704	0.0194663822657276	TRUE	kshv-miR-K12-1,kshv-miR-K12-4-3p,kshv-miR-K12-4-5p
NM_018132	219294_at	TR(1..1753)CDS(90..896)	55166	CENPQ	Homo sapiens centromere protein Q (CENPQ), mRNA.	-1.03830971140350	6.54376886037259	0.0212563904458511	TRUE	kshv-miR-K12-2,kshv-miR-K12-1,kshv-miR-K12-4-5p
NM_153223	1554606_at,226449_at	TR(1..4677)CDS(83..3043)	153241	CEP120	Homo sapiens centrosomal protein 120kDa (CEP120), mRNA.	-0.659019651024466	6.45703536320564	0.0186377509955250	TRUE	kshv-miR-K12-4-5p
NM_025009	206003_at	TR(1..5687)CDS(235..3657)	9662	CEP135	Homo sapiens centrosomal protein 135kDa (CEP135), mRNA.	-1.40900784379913	7.05268523314267	0.0190369638992167	TRUE	kshv-miR-K12-2,kshv-miR-K12-1
NM_024899	52285_f_at,219311_at	TR(1..2884)CDS(157..2136)	79959	CEP76	Homo sapiens centrosomal protein 76kDa (CEP76), mRNA.	-0.741250238035588	7.41693236321268	0.00295812157399514	TRUE	kshv-miR-K12-4-3p
NM_022766	218421_at	TR(1..4445)CDS(108..1721)	64781	CERK	Homo sapiens ceramide kinase (CERK), mRNA.	-0.514060373971915	6.21111961982555	0.0071627523418332	TRUE	kshv-miR-K12-1,kshv-miR-K12-6-5p,kshv-miR-K12-4-3p,kshv-miR-K12-9*,kshv-miR-K12-4-5p
NM_001127183	211317_s_at	TR(1..2004)CDS(376..1818)	8837	CFLAR	Homo sapiens CASP8 and FADD-like apoptosis regulator (CFLAR), transcript variant 2, mRNA.	-1.12525156611243	5.26750337561937	0.000390461784554465	TRUE	kshv-miR-K12-1
NM_001270	204258_at	TR(1..6457)CDS(149..5281)	1105	CHD1	Homo sapiens chromodomain helicase DNA binding protein 1 (CHD1), mRNA.	-0.808249198014026	9.47012811184892	0.00157464439164619	TRUE	kshv-miR-K12-1
NM_004284	207645_s_at,212539_at,1556988_s_at	TR(1..3023)CDS(64..2757)	9557	CHD1L	Homo sapiens chromodomain helicase DNA binding protein 1-like (CHD1L), mRNA.	-0.578278840340418	7.17866590882391	0.0339882732477583	TRUE	kshv-miR-K12-1,kshv-miR-K12-4-5p
NM_001271	225077_at,1554015_a_at,1554014_at	TR(1..9374)CDS(576..6062)	1106	CHD2	Homo sapiens chromodomain helicase DNA binding protein 2 (CHD2), transcript variant 1, mRNA.	-1.02543031323944	5.36037892590431	0.00452479113592022	TRUE	kshv-miR-K12-2,kshv-miR-K12-1,kshv-miR-K12-6-5p,kshv-miR-K12-9*
NM_025134	229586_at,212616_at,212615_at,235388_at	TR(1..11479)CDS(210..8855)	80205	CHD9	Homo sapiens chromodomain helicase DNA binding protein 9 (CHD9), mRNA.	-0.651446155845181	6.83201988542297	0.0178508982168582	TRUE	kshv-miR-K12-5,kshv-miR-K12-1,kshv-miR-K12-11,kshv-miR-K12-6-5p
NM_012110	219492_at	TR(1..1151)CDS(322..819)	26511	CHIC2	Homo sapiens cysteine-rich hydrophobic domain 2 (CHIC2), mRNA.	-0.496380590443082	10.4979906662927	0.00210435964995948	TRUE	kshv-miR-K12-4-3p
NM_000390	227871_at,207099_s_at	TR(1..5442)CDS(31..1992)	1121	CHM	Homo sapiens choroideremia (Rab escort protein 1) (CHM), transcript variant 1, mRNA.	-0.61662257792879	5.94056259085769	0.000191810856481663	TRUE	kshv-miR-K12-2,kshv-miR-K12-1,kshv-miR-K12-11,kshv-miR-K12-9*,kshv-miR-K12-9
NM_000745	206533_at	TR(1..2468)CDS(163..1569)	1138	CHRNA5	Homo sapiens cholinergic receptor, nicotinic, alpha 5 (CHRNA5), mRNA.	-0.860679518746784	5.27352190885563	0.000796125060798171	TRUE	kshv-miR-K12-1,kshv-miR-K12-3,kshv-miR-K12-6-5p
NM_000747	206703_at	TR(1..2437)CDS(42..1547)	1140	CHRNB1	Homo sapiens cholinergic receptor, nicotinic, beta 1 (muscle) (CHRNB1), mRNA.	-0.75217789262693	2.81942080865655	0.00514605078287497	FALSE	kshv-miR-K12-1,kshv-miR-K12-3,kshv-miR-K12-9*,kshv-miR-K12-7
NM_015282	212752_at	TR(1..8089)CDS(391..5007)	23332	CLASP1	Homo sapiens cytoplasmic linker associated protein 1 (CLASP1), mRNA.	-1.28811471880897	6.9573522146362	0.00104116902120514	TRUE	kshv-miR-K12-3,kshv-miR-K12-6-5p,kshv-miR-K12-9*
NM_014666	201769_at,201768_s_at	TR(1..3425)CDS(191..2068)	9685	CLINT1	Homo sapiens clathrin interactor 1 (CLINT1), mRNA.	-0.758513297578884	9.3742265212361	0.000152901959985814	TRUE	kshv-miR-K12-2,kshv-miR-K12-11,kshv-miR-K12-9*,kshv-miR-K12-4-5p
NM_022111	1553120_at	TR(1..4379)CDS(81..4100)	63967	CLSPN	Homo sapiens claspin homolog (Xenopus laevis) (CLSPN), mRNA.	-0.748804969563587	2.65687112763657	0.000213923486464267	TRUE	kshv-miR-K12-6-3p
NM_152495	214841_at	TR(1..2372)CDS(699..1181)	149111	CNIH3	Homo sapiens cornichon homolog 3 (Drosophila) (CNIH3), mRNA.	-0.797265133308857	2.98383601261977	0.000540662967152662	TRUE	kshv-miR-K12-6-3p,kshv-miR-K12-4-3p,kshv-miR-K12-9*
NM_173515	242394_at,227481_at	TR(1..3277)CDS(506..2173)	154043	CNKSR3	Homo sapiens CNKSR family member 3 (CNKSR3), mRNA.	-0.56690569032732	4.88542548139940	3.41461856315535e-05	TRUE	kshv-miR-K12-3
NM_144571	238438_at,227119_at	TR(1..8794)CDS(83..1750)	246175	CNOT6L	Homo sapiens CCR4-NOT transcription complex, subunit 6-like (CNOT6L), mRNA.	-0.844284063143906	4.31644389019409	0.000199021365952314	TRUE	kshv-miR-K12-5,kshv-miR-K12-2,kshv-miR-K12-1,kshv-miR-K12-11,kshv-miR-K12-3,kshv-miR-K12-6-5p
NM_004779	202162_s_at,202163_s_at,202164_s_at	TR(1..2550)CDS(252..1130)	9337	CNOT8	Homo sapiens CCR4-NOT transcription complex, subunit 8 (CNOT8), mRNA.	-0.785002208597023	7.67204699544925	0.000260497078820526	TRUE	kshv-miR-K12-2,kshv-miR-K12-3
NM_001114395	239989_at,220095_at,1559005_s_at	TR(1..4887)CDS(27..1202)	54875	CNTLN	Homo sapiens centlein, centrosomal protein (CNTLN), transcript variant 2, mRNA.	-1.15625985156906	4.2206356727163	8.25303615140573e-05	TRUE	kshv-miR-K12-2,kshv-miR-K12-1,kshv-miR-K12-4-3p,kshv-miR-K12-9
NM_016128	217749_at	TR(1..3114)CDS(101..2725)	22820	COPG	Homo sapiens coatomer protein complex, subunit gamma (COPG), mRNA.	-1.71607790907653	6.87947069487528	0.00180057054225669	TRUE	kshv-miR-K12-6-3p,kshv-miR-K12-1
NM_022730	219997_s_at	TR(1..1977)CDS(104..898)	64708	COPS7B	Homo sapiens COP9 constitutive photomorphogenic homolog subunit 7B (Arabidopsis) (COPS7B), mRNA.	-0.830614652526278	4.28357847588073	3.47764602015687e-05	FALSE	kshv-miR-K12-6-5p
NM_016468	223191_at,217645_at	TR(1..1713)CDS(141..461)	51241	COX16	Homo sapiens COX16 cytochrome c oxidase assembly homolog (S. cerevisiae) (COX16), mRNA.	-0.658620663184913	8.73208054992244	0.0176632531516732	TRUE	kshv-miR-K12-5,kshv-miR-K12-3,kshv-miR-K12-6-5p,kshv-miR-K12-4-3p,kshv-miR-K12-9*
NM_014711	204662_at	TR(1..5515)CDS(391..3366)	9738	CP110	Homo sapiens CP110 protein (CP110), mRNA.	-0.599363999425565	8.15753514778058	0.0454548656738015	TRUE	kshv-miR-K12-2
NM_001875	204920_at,217564_s_at	TR(1..5770)CDS(133..4635)	1373	CPS1	Homo sapiens carbamoyl-phosphate synthetase 1, mitochondrial (CPS1), nuclear gene encoding mitochondrial protein, transcript variant 2, mRNA.	-0.766045166746156	4.28841934276066	9.5560096879046e-06	TRUE	kshv-miR-K12-3
NM_017437	225994_at	TR(1..5041)CDS(238..2586)	53981	CPSF2	Homo sapiens cleavage and polyadenylation specific factor 2, 100kDa (CPSF2), mRNA.	-0.942767943304569	8.69248101683817	0.00100803934580143	TRUE	kshv-miR-K12-6-3p,kshv-miR-K12-9*
NM_020825	225172_at	TR(1..7413)CDS(353..3550)	57585	CRAMP1L	Homo sapiens Crm, cramped-like (Drosophila) (CRAMP1L), mRNA.	-0.60754355921345	5.80930595749531	0.0256186592204770	TRUE	kshv-miR-K12-1,kshv-miR-K12-6-5p,kshv-miR-K12-7
NM_001039618	202978_s_at,202979_s_at,202977_s_at,225595_at,225594_at,213584_s_at	TR(1..7304)CDS(255..1319)	58487	CREBZF	Homo sapiens CREB/ATF bZIP transcription factor (CREBZF), mRNA.	-0.983466821384794	6.23343367327058	0.00852288402021982	TRUE	kshv-miR-K12-2,kshv-miR-K12-3,kshv-miR-K12-4-3p,kshv-miR-K12-9,kshv-miR-K12-11,kshv-miR-K12-1,kshv-miR-K12-5,kshv-miR-K12-6-5p,kshv-miR-K12-4-5p,kshv-miR-K12-7
NM_005207	206184_at,212180_at	TR(1..5235)CDS(510..1421)	1399	CRKL	Homo sapiens v-crk sarcoma virus CT10 oncogene homolog (avian)-like (CRKL), mRNA.	-0.64734125636162	5.78615587278980	1.64884903208544e-05	TRUE	kshv-miR-K12-8,kshv-miR-K12-1,kshv-miR-K12-3,kshv-miR-K12-6-5p,kshv-miR-K12-9*,kshv-miR-K12-7
NM_016424	203804_s_at,208835_s_at	TR(1..3477)CDS(118..1416)	51747	CROP	Homo sapiens cisplatin resistance-associated overexpressed protein (CROP), transcript variant 1, mRNA.	-1.07173740877772	9.9862443762908	0.0429386215008545	TRUE	kshv-miR-K12-1
NM_001316	210766_s_at,201111_at,201112_s_at	TR(1..3579)CDS(135..3050)	1434	CSE1L	Homo sapiens CSE1 chromosome segregation 1-like (yeast) (CSE1L), mRNA.	-0.531204587312554	11.3604685691998	0.0153801196598845	TRUE	kshv-miR-K12-11,kshv-miR-K12-3
NM_001025105	208867_s_at	TR(1..3149)CDS(481..1578)	1452	CSNK1A1	Homo sapiens casein kinase 1, alpha 1 (CSNK1A1), transcript variant 1, mRNA.	-1.46405762425963	8.53518130963281	1.40141064201674e-05	TRUE	kshv-miR-K12-1,kshv-miR-K12-11,kshv-miR-K12-6-5p
NM_001033521	32723_at,202190_at	TR(1..2295)CDS(201..1496)	1477	CSTF1	Homo sapiens cleavage stimulation factor, 3' pre-RNA, subunit 1, 50kDa (CSTF1), transcript variant 1, mRNA.	-0.906162582726087	7.42464613170255	0.000283929487912768	TRUE	kshv-miR-K12-1,kshv-miR-K12-11,kshv-miR-K12-6-5p
NM_015235	212901_s_at,212905_at	TR(1..4127)CDS(47..1897)	23283	CSTF2T	Homo sapiens cleavage stimulation factor, 3' pre-RNA, subunit 2, 64kDa, tau variant (CSTF2T), mRNA.	-0.793146887643647	7.17569609570305	0.00127672805760922	TRUE	kshv-miR-K12-2,kshv-miR-K12-9
NM_203354	204055_s_at	TR(1..3431)CDS(124..2502)	4253	CTAGE5	Homo sapiens CTAGE family, member 5 (CTAGE5), transcript variant 2, mRNA.	-0.914403017698069	2.76398305845384	0.00584286138040001	TRUE	kshv-miR-K12-3
NM_001328	213980_s_at,203392_s_at	TR(1..2288)CDS(166..1488)	1487	CTBP1	Homo sapiens C-terminal binding protein 1 (CTBP1), transcript variant 1, mRNA.	-1.11990242805833	9.04499297217089	0.00035256445163613	TRUE	kshv-miR-K12-6-5p
NM_016396	223270_at,1555106_a_at,223271_s_at	TR(1..4875)CDS(417..1817)	51496	CTDSPL2	Homo sapiens CTD (carboxy-terminal domain, RNA polymerase II, polypeptide A) small phosphatase like 2 (CTDSPL2), mRNA.	-0.95339015724203	7.07913834091956	0.0145240248209139	TRUE	kshv-miR-K12-2,kshv-miR-K12-11,kshv-miR-K12-4-3p,kshv-miR-K12-9
NM_018294	229038_at	TR(1..2633)CDS(88..1704)	55280	CWF19L1	Homo sapiens CWF19-like 1, cell cycle control (S. pombe) (CWF19L1), mRNA.	-1.97887370217949	4.33357029530905	0.000363707045442626	TRUE	kshv-miR-K12-1,kshv-miR-K12-9*
NM_018360	219969_at	TR(1..2045)CDS(52..1638)	55787	CXorf15	Homo sapiens chromosome X open reading frame 15 (CXorf15), mRNA.	-0.835547676198327	4.04145047431429	0.00137605393199587	TRUE	kshv-miR-K12-5
NM_207318	227133_at,242781_at	TR(1..3028)CDS(167..1333)	139231	CXorf39	Homo sapiens chromosome X open reading frame 39 (CXorf39), mRNA.	-0.828484606357393	6.78030165291039	0.000394344467982083	TRUE	kshv-miR-K12-8,kshv-miR-K12-1,kshv-miR-K12-11,kshv-miR-K12-6-5p
NM_030579	201633_s_at,227382_at,201634_s_at,238554_at	TR(1..4286)CDS(90..542)	80777	CYB5B	Homo sapiens cytochrome b5 type B (outer mitochondrial membrane) (CYB5B), nuclear gene encoding mitochondrial protein, mRNA.	-1.05008397749911	7.02630718078998	9.19359637694491e-05	TRUE	kshv-miR-K12-6-3p,kshv-miR-K12-5,kshv-miR-K12-1,kshv-miR-K12-6-5p,kshv-miR-K12-4-5p
NM_019885	234721_s_at,219825_at	TR(1..4534)CDS(1..1539)	56603	CYP26B1	Homo sapiens cytochrome P450, family 26, subfamily B, polypeptide 1 (CYP26B1), mRNA.	-0.657801122292321	3.57855300005139	2.6337613403891e-06	TRUE	kshv-miR-K12-2,kshv-miR-K12-3,kshv-miR-K12-9,kshv-miR-K12-6-3p,kshv-miR-K12-11,kshv-miR-K12-5,kshv-miR-K12-6-5p,kshv-miR-K12-9*
NM_014992	216060_s_at	TR(1..4256)CDS(126..3362)	23002	DAAM1	Homo sapiens dishevelled associated activator of morphogenesis 1 (DAAM1), mRNA.	-1.20554002283739	9.85489491529901	3.56906243204432e-05	TRUE	kshv-miR-K12-1,kshv-miR-K12-3
NM_004395	202806_at,217025_s_at	TR(1..2942)CDS(173..2122)	1627	DBN1	Homo sapiens drebrin 1 (DBN1), transcript variant 1, mRNA.	-0.787795360722676	7.04066341329883	0.00261642846183952	TRUE	kshv-miR-K12-4-3p,kshv-miR-K12-9*
NM_152624	238779_at,212919_at,235258_at	TR(1..8947)CDS(199..1461)	167227	DCP2	Homo sapiens DCP2 decapping enzyme homolog (S. cerevisiae) (DCP2), mRNA.	-0.699917615906204	5.47091461126117	0.000496368857693315	TRUE	kshv-miR-K12-2,kshv-miR-K12-3,kshv-miR-K12-4-3p,kshv-miR-K12-9,kshv-miR-K12-6-3p,kshv-miR-K12-11,kshv-miR-K12-1,kshv-miR-K12-9*
NM_032486	209232_s_at	TR(1..3377)CDS(58..606)	84516	DCTN5	Homo sapiens dynactin 5 (p25) (DCTN5), mRNA.	-0.541759432277937	8.1686520514251	0.00202281284016881	TRUE	kshv-miR-K12-5,kshv-miR-K12-1,kshv-miR-K12-4-5p
NM_001014283	219116_s_at	TR(1..3046)CDS(40..819)	55208	DCUN1D2	Homo sapiens DCN1, defective in cullin neddylation 1, domain containing 2 (S. cerevisiae) (DCUN1D2), mRNA.	-1.38699767116023	4.54340675443604	0.000510552175152665	TRUE	kshv-miR-K12-1,kshv-miR-K12-11,kshv-miR-K12-3,kshv-miR-K12-6-5p,kshv-miR-K12-9*
NM_001134445	209094_at,243711_at,1553565_s_at	TR(1..4023)CDS(503..1051)	23576	DDAH1	Homo sapiens dimethylarginine dimethylaminohydrolase 1 (DDAH1), transcript variant 2, mRNA.	-0.685776843869827	6.14003161260684	1.41208797813594e-05	TRUE	kshv-miR-K12-6-3p,kshv-miR-K12-5,kshv-miR-K12-11,kshv-miR-K12-3,kshv-miR-K12-6-5p,kshv-miR-K12-7,kshv-miR-K12-4-5p
NM_006386	213998_s_at,208719_s_at,208718_at	TR(1..4805)CDS(104..2293)	10521	DDX17	Homo sapiens DEAD (Asp-Glu-Ala-Asp) box polypeptide 17 (DDX17), transcript variant 1, mRNA.	-0.786976753781488	6.32671816717244	0.0279660599432837	TRUE	kshv-miR-K12-6-3p,kshv-miR-K12-5,kshv-miR-K12-11,kshv-miR-K12-6-5p,kshv-miR-K12-7
NM_014829	228039_at,202462_s_at	TR(1..5695)CDS(169..3264)	9879	DDX46	Homo sapiens DEAD (Asp-Glu-Ala-Asp) box polypeptide 46 (DDX46), mRNA.	-1.41408017145230	9.40357226711139	0.00091538984129258	TRUE	kshv-miR-K12-2,kshv-miR-K12-1,kshv-miR-K12-4-3p,kshv-miR-K12-4-5p,kshv-miR-K12-9
NM_001039712	202480_s_at,215158_s_at	TR(1..2300)CDS(174..1130)	9191	DEDD	Homo sapiens death effector domain containing (DEDD), transcript variant 4, mRNA.	-0.656874278666695	6.86561033682666	0.00217664344360521	TRUE	kshv-miR-K12-9*
NM_020946	226849_at,219763_at	TR(1..5041)CDS(234..3263)	57706	DENND1A	Homo sapiens DENN/MADD domain containing 1A (DENND1A), transcript variant 1, mRNA.	-0.498539881808869	5.54710538672505	0.0331579977675883	TRUE	kshv-miR-K12-6-3p,kshv-miR-K12-6-5p,kshv-miR-K12-9*
NM_018369	226980_at	TR(1..2484)CDS(37..1626)	55789	DEPDC1B	Homo sapiens DEP domain containing 1B (DEPDC1B), mRNA.	-0.749171629398907	6.92526867602124	0.0368571125073041	TRUE	kshv-miR-K12-5
NM_003648	208072_s_at	TR(1..6229)CDS(80..3592)	8527	DGKD	Homo sapiens diacylglycerol kinase, delta 130kDa (DGKD), transcript variant 1, mRNA.	-0.770665558413912	5.34705938401745	0.0248678679922783	FALSE	kshv-miR-K12-5,kshv-miR-K12-3,kshv-miR-K12-6-5p,kshv-miR-K12-9*
NM_014762	200862_at	TR(1..4286)CDS(130..1680)	1718	DHCR24	Homo sapiens 24-dehydrocholesterol reductase (DHCR24), mRNA.	-1.02962588461480	8.69785715204177	0.00109376643465172	TRUE	kshv-miR-K12-5,kshv-miR-K12-3,kshv-miR-K12-7
NM_001360	201791_s_at,201790_s_at	TR(1..2665)CDS(274..1701)	1717	DHCR7	Homo sapiens 7-dehydrocholesterol reductase (DHCR7), mRNA.	-0.95966335050742	7.76019744044819	0.00162819636932641	TRUE	kshv-miR-K12-1
NM_021931	234728_s_at,218579_s_at	TR(1..3316)CDS(12..2123)	60625	DHX35	Homo sapiens DEAH (Asp-Glu-Ala-His) box polypeptide 35 (DHX35), mRNA.	-1.48758322668421	5.82279217413522	0.000774046077611153	TRUE	kshv-miR-K12-5,kshv-miR-K12-6-5p,kshv-miR-K12-9*,kshv-miR-K12-7,kshv-miR-K12-4-5p
NM_000108	209095_at,230426_at	TR(1..3579)CDS(111..1640)	1738	DLD	Homo sapiens dihydrolipoamide dehydrogenase (DLD), mRNA.	-0.507852190726587	8.5251400628532	0.000110989859931907	TRUE	kshv-miR-K12-5,kshv-miR-K12-6-5p,kshv-miR-K12-4-3p,kshv-miR-K12-9
NM_001080449	213647_at	TR(1..4416)CDS(1..3441)	1763	DNA2	Homo sapiens DNA replication helicase 2 homolog (yeast) (DNA2), mRNA.	-1.41634267254458	6.59709248561945	0.00124397123551817	TRUE	kshv-miR-K12-4-3p
NM_001031723	219237_s_at	TR(1..2783)CDS(152..1291)	79982	DNAJB14	Homo sapiens DnaJ (Hsp40) homolog, subfamily B, member 14 (DNAJB14), transcript variant 1, mRNA.	-0.814373861258734	9.41566285507872	0.0174712342571660	TRUE	kshv-miR-K12-2,kshv-miR-K12-4-5p
NM_007034	203811_s_at,203810_at	TR(1..2250)CDS(160..1173)	11080	DNAJB4	Homo sapiens DnaJ (Hsp40) homolog, subfamily B, member 4 (DNAJB4), mRNA.	-1.25957522686596	8.19695145140992	0.00243636763859298	TRUE	kshv-miR-K12-1,kshv-miR-K12-4-3p
NM_032364	1554451_s_at,223420_at	TR(1..3330)CDS(205..2313)	85406	DNAJC14	Homo sapiens DnaJ (Hsp40) homolog, subfamily C, member 14 (DNAJC14), mRNA.	-1.04166622945134	6.45494774482692	0.0213708269585755	TRUE	kshv-miR-K12-9*
NM_013238	227808_at,218435_at	TR(1..2792)CDS(402..854)	29103	DNAJC15	Homo sapiens DnaJ (Hsp40) homolog, subfamily C, member 15 (DNAJC15), mRNA.	-0.559764388409192	5.45489953905316	0.0195113203840555	TRUE	kshv-miR-K12-11,kshv-miR-K12-3,kshv-miR-K12-4-3p
NM_001012339	235032_at,238337_s_at,230893_at	TR(1..6083)CDS(228..1823)	134218	DNAJC21	Homo sapiens DnaJ (Hsp40) homolog, subfamily C, member 21 (DNAJC21), transcript variant 2, mRNA.	-0.687729216755028	7.44064423248251	0.000281380234650041	TRUE	kshv-miR-K12-1,kshv-miR-K12-3,kshv-miR-K12-4-3p,kshv-miR-K12-9*
NM_025219	224613_s_at	TR(1..3286)CDS(171..767)	80331	DNAJC5	Homo sapiens DnaJ (Hsp40) homolog, subfamily C, member 5 (DNAJC5), mRNA.	-0.704720752825429	5.68971268913293	0.00470959016787790	TRUE	kshv-miR-K12-1,kshv-miR-K12-3*,kshv-miR-K12-6-5p
NM_024918	219512_at	TR(1..2095)CDS(282..1352)	79980	DSN1	Homo sapiens DSN1, MIND kinetochore complex component, homolog (S. cerevisiae) (DSN1), mRNA.	-1.47014778585880	7.48187279112232	0.00142829919376450	TRUE	kshv-miR-K12-1,kshv-miR-K12-3,kshv-miR-K12-9*
NM_016448	218585_s_at,222680_s_at	TR(1..4428)CDS(315..2507)	51514	DTL	Homo sapiens denticleless homolog (Drosophila) (DTL), mRNA.	-0.92859020988544	8.603009942657	0.0193251008885582	TRUE	kshv-miR-K12-3,kshv-miR-K12-6-5p
NM_057158	204015_s_at,204014_at	TR(1..3404)CDS(1561..2472)	1846	DUSP4	Homo sapiens dual specificity phosphatase 4 (DUSP4), transcript variant 2, mRNA.	-1.32189593533555	8.41768390222122	2.97726728918376e-05	TRUE	kshv-miR-K12-9*
NM_022652	208893_s_at,208891_at,208892_s_at	TR(1..2404)CDS(481..1188)	1848	DUSP6	Homo sapiens dual specificity phosphatase 6 (DUSP6), transcript variant 2, mRNA.	-1.33580354462421	8.2349967556191	0.00122541758642045	TRUE	kshv-miR-K12-3,kshv-miR-K12-9*
NM_001025248	208955_at,209932_s_at	TR(1..2146)CDS(93..851)	1854	DUT	Homo sapiens deoxyuridine triphosphatase (DUT), nuclear gene encoding mitochondrial protein, transcript variant 1, mRNA.	-1.10718394662153	10.1371826617406	0.00232006638652281	TRUE	kshv-miR-K12-1
NM_005225	204947_at,2028_s_at	TR(1..2722)CDS(141..1454)	1869	E2F1	Homo sapiens E2F transcription factor 1 (E2F1), mRNA.	-0.84489780063803	5.52580824817883	0.0094115824274262	TRUE	kshv-miR-K12-3
NM_024680	219990_at	TR(1..3736)CDS(523..3126)	79733	E2F8	Homo sapiens E2F transcription factor 8 (E2F8), mRNA.	-1.57901913529091	7.78536712843829	0.0160233050819793	TRUE	kshv-miR-K12-1,kshv-miR-K12-3,kshv-miR-K12-4-5p
NM_033083	226952_at	TR(1..4503)CDS(224..1030)	85403	EAF1	Homo sapiens ELL associated factor 1 (EAF1), mRNA.	-0.705281915888679	7.69522795912339	0.00477839192886443	TRUE	kshv-miR-K12-2,kshv-miR-K12-1,kshv-miR-K12-3,kshv-miR-K12-4-3p,kshv-miR-K12-4-5p
NM_014674	203279_at	TR(1..6162)CDS(133..2106)	9695	EDEM1	Homo sapiens ER degradation enhancer, mannosidase alpha-like 1 (EDEM1), mRNA.	-0.641839077627176	7.99473203962467	0.049884378903264	TRUE	kshv-miR-K12-5,kshv-miR-K12-2,kshv-miR-K12-1,kshv-miR-K12-11,kshv-miR-K12-4-3p,kshv-miR-K12-9*,kshv-miR-K12-4-5p
NM_005711	207379_at,1558643_s_at	TR(1..2974)CDS(420..1862)	10085	EDIL3	Homo sapiens EGF-like repeats and discoidin I-like domains 3 (EDIL3), mRNA.	-1.29150270788356	5.43258616128718	1.48853134769565e-05	TRUE	kshv-miR-K12-4-3p,kshv-miR-K12-4-5p
NM_003566	225885_at,204841_s_at,204840_s_at	TR(1..8019)CDS(266..4501)	8411	EEA1	Homo sapiens early endosome antigen 1 (EEA1), mRNA.	-0.526528536063598	6.35911775739821	0.000340870958678542	TRUE	kshv-miR-K12-2,kshv-miR-K12-1,kshv-miR-K12-3,kshv-miR-K12-6-5p,kshv-miR-K12-4-3p,kshv-miR-K12-4-5p
NM_152991	209572_s_at,210656_at	TR(1..2413)CDS(458..1660)	8726	EED	Homo sapiens embryonic ectoderm development (EED), transcript variant 2, mRNA.	-0.556599984740039	6.73661909599804	0.0273718863890398	TRUE	kshv-miR-K12-9*,kshv-miR-K12-7,kshv-miR-K12-4-5p
NM_201446	218825_at	TR(1..1571)CDS(318..1139)	51162	EGFL7	Homo sapiens EGF-like-domain, multiple 7 (EGFL7), transcript variant 2, mRNA.	-1.39532099566641	9.98547300134174	0.000130093531032184	TRUE	kshv-miR-K12-6-5p,kshv-miR-K12-9*,kshv-miR-K12-7
NM_014600	218935_at	TR(1..3583)CDS(286..1893)	30845	EHD3	Homo sapiens EH-domain containing 3 (EHD3), mRNA.	-1.68905294969561	7.67707713649317	0.00162190521014458	TRUE	kshv-miR-K12-2,kshv-miR-K12-4-3p,kshv-miR-K12-9
NM_014335	208669_s_at,211698_at,208670_s_at	TR(1..2096)CDS(85..648)	23741	EID1	Homo sapiens EP300 interacting inhibitor of differentiation 1 (EID1), mRNA.	-0.607363426547243	10.8502382744309	0.00209456920984836	TRUE	kshv-miR-K12-1,kshv-miR-K12-4-3p
NM_152361	242470_at	TR(1..1865)CDS(53..538)	126272	EID2B	Homo sapiens EP300 interacting inhibitor of differentiation 2B (EID2B), mRNA.	-1.27793988275322	6.39151119810842	0.00762004564468645	TRUE	kshv-miR-K12-1,kshv-miR-K12-4-3p,kshv-miR-K12-9*,kshv-miR-K12-7
NM_001008394	231292_at	TR(1..1447)CDS(165..1166)	493861	EID3	Homo sapiens EP300 interacting inhibitor of differentiation 3 (EID3), mRNA.	-0.531978198524676	2.78586729995764	0.0374007517312138	TRUE	kshv-miR-K12-5
NM_001412	201018_at	TR(1..4431)CDS(209..643)	1964	EIF1AX	Homo sapiens eukaryotic translation initiation factor 1A, X-linked (EIF1AX), mRNA.	-0.980468420920492	8.31661760689847	0.0101013561597762	TRUE	kshv-miR-K12-2,kshv-miR-K12-1,kshv-miR-K12-3,kshv-miR-K12-4-3p
NM_177422	219426_at	TR(1..3320)CDS(701..2581)	192669	EIF2C3	Homo sapiens eukaryotic translation initiation factor 2C, 3 (EIF2C3), transcript variant 2, mRNA.	-0.861727295059777	6.80997369206586	0.0365424235482171	TRUE	kshv-miR-K12-4-3p
NM_003908	208725_at	TR(1..2592)CDS(170..1171)	8894	EIF2S2	Homo sapiens eukaryotic translation initiation factor 2, subunit 2 beta, 38kDa (EIF2S2), mRNA.	-0.876285076130258	5.21425353943849	0.0107918954250657	TRUE	kshv-miR-K12-1
NM_004432	208427_s_at,228260_at	TR(1..3808)CDS(276..1355)	1993	ELAVL2	Homo sapiens ELAV (embryonic lethal, abnormal vision, Drosophila)-like 2 (Hu antigen B) (ELAVL2), mRNA.	-0.99738203779694	4.43239953420849	0.000239586489190175	TRUE	kshv-miR-K12-5,kshv-miR-K12-2,kshv-miR-K12-11
NM_172373	212420_at,212418_at	TR(1..3499)CDS(229..2088)	1997	ELF1	Homo sapiens E74-like factor 1 (ets domain transcription factor) (ELF1), mRNA.	-0.499117522141238	7.31745129715125	0.00020367542720529	TRUE	kshv-miR-K12-1
NM_201999	203822_s_at	TR(1..3218)CDS(207..1952)	1998	ELF2	Homo sapiens E74-like factor 2 (ets domain transcription factor) (ELF2), transcript variant 1, mRNA.	-0.587110052124826	7.10728228825545	0.0114111287907249	TRUE	kshv-miR-K12-2,kshv-miR-K12-3,kshv-miR-K12-4-3p
NM_005230	206127_at	TR(1..2180)CDS(280..1503)	2004	ELK3	Homo sapiens ELK3, ETS-domain protein (SRF accessory protein 2) (ELK3), mRNA.	-0.703449152535541	4.33347188158279	0.00084059656098331	TRUE	kshv-miR-K12-11
NM_001039459	204513_s_at	TR(1..2129)CDS(150..893)	9844	ELMO1	Homo sapiens engulfment and cell motility 1 (ELMO1), transcript variant 3, mRNA.	-0.845150404024037	3.27944280983751	0.0105133748332265	TRUE	kshv-miR-K12-5
NM_001130721	210868_s_at	TR(1..3189)CDS(127..924)	79071	ELOVL6	Homo sapiens ELOVL family member 6, elongation of long chain fatty acids (FEN1/Elo2, SUR4/Elo3-like, yeast) (ELOVL6), transcript variant 2, mRNA.	-1.42051076360196	4.84021504443581	0.00079881002139076	TRUE	kshv-miR-K12-2,kshv-miR-K12-11,kshv-miR-K12-3,kshv-miR-K12-6-5p
NM_019063	223068_at,223069_s_at,228674_s_at,220386_s_at	TR(1..5539)CDS(237..3182)	27436	EML4	Homo sapiens echinoderm microtubule associated protein like 4 (EML4), mRNA.	-0.872352165137836	5.73599477723101	0.0273854829320587	TRUE	kshv-miR-K12-2
NM_001008493	228310_at,222434_at,1553672_at	TR(1..13172)CDS(454..2229)	55740	ENAH	Homo sapiens enabled homolog (Drosophila) (ENAH), transcript variant 1, mRNA.	-1.74350336917913	5.75268465130249	6.78133207108349e-06	TRUE	kshv-miR-K12-8,kshv-miR-K12-3,kshv-miR-K12-3*,kshv-miR-K12-4-3p,kshv-miR-K12-6-3p,kshv-miR-K12-11,kshv-miR-K12-1,kshv-miR-K12-5,kshv-miR-K12-6-5p,kshv-miR-K12-9*
NM_005107	206902_s_at	TR(1..1459)CDS(27..1133)	9941	ENDOGL1	Homo sapiens endonuclease G-like 1 (ENDOGL1), mRNA.	-1.25877175928406	3.34117146025512	0.0121175404677166	TRUE	kshv-miR-K12-6-3p,kshv-miR-K12-9*
NM_012307	206710_s_at,211776_s_at,212681_at	TR(1..4446)CDS(87..3350)	23136	EPB41L3	Homo sapiens erythrocyte membrane protein band 4.1-like 3 (EPB41L3), mRNA.	-0.661543984303672	2.85556471193618	0.000231807143533517	TRUE	kshv-miR-K12-4-5p
NM_004438	206114_at,227449_at,228948_at,229374_at	TR(1..6364)CDS(43..3003)	2043	EPHA4	Homo sapiens EPH receptor A4 (EPHA4), mRNA.	-1.08396842713804	6.58954963682358	2.15508380658786e-07	TRUE	kshv-miR-K12-5,kshv-miR-K12-2,kshv-miR-K12-1,kshv-miR-K12-3,kshv-miR-K12-4-5p
NM_001130140	227462_at,1554273_a_at,235104_at,219759_at	TR(1..5254)CDS(274..3156)	64167	ERAP2	Homo sapiens endoplasmic reticulum aminopeptidase 2 (ERAP2), transcript variant 2, mRNA.	-0.735461934889827	4.33270452350896	0.00128651857656658	TRUE	kshv-miR-K12-6-3p,kshv-miR-K12-2,kshv-miR-K12-1,kshv-miR-K12-4-3p,kshv-miR-K12-4-5p
NM_024896	222603_at,218342_s_at	TR(1..5355)CDS(55..2769)	79956	ERMP1	Homo sapiens endoplasmic reticulum metallopeptidase 1 (ERMP1), mRNA.	-0.519676582237527	8.3519770329461	0.00466257721276482	TRUE	kshv-miR-K12-2,kshv-miR-K12-11,kshv-miR-K12-3,kshv-miR-K12-9*,kshv-miR-K12-4-5p
NM_138961	225369_at	TR(1..1869)CDS(174..1346)	90952	ESAM	Homo sapiens endothelial cell adhesion molecule (ESAM), mRNA.	-1.54356471732829	7.83852617048892	7.09305737929071e-05	TRUE	kshv-miR-K12-6-3p,kshv-miR-K12-6-5p
NM_019002	219216_at	TR(1..3298)CDS(140..2920)	54465	ETAA1	Homo sapiens Ewing tumor-associated antigen 1 (ETAA1), mRNA.	-1.04928092632291	6.64897213541122	0.000424985553564961	TRUE	kshv-miR-K12-6-5p,kshv-miR-K12-4-3p
NM_021807	240528_s_at,224926_at	TR(1..4203)CDS(36..2960)	60412	EXOC4	Homo sapiens exocyst complex component 4 (EXOC4), transcript variant 1, mRNA.	-0.540664045064954	5.6273288902969	0.00409977943997241	TRUE	kshv-miR-K12-2,kshv-miR-K12-6-5p
NM_001013848	226259_at,233924_s_at	TR(1..3568)CDS(27..2426)	54536	EXOC6	Homo sapiens exocyst complex component 6 (EXOC6), transcript variant 2, mRNA.	-0.607190139148252	7.68625852369678	0.0303085966610173	TRUE	kshv-miR-K12-2,kshv-miR-K12-1,kshv-miR-K12-3
NM_014285	209527_at,214507_s_at	TR(1..2194)CDS(22..903)	23404	EXOSC2	Homo sapiens exosome component 2 (EXOSC2), mRNA.	-0.620376914934445	7.93226801707936	0.0456316583941056	TRUE	kshv-miR-K12-5,kshv-miR-K12-1,kshv-miR-K12-11,kshv-miR-K12-3
NM_058219	1553947_at	TR(1..1729)CDS(31..849)	118460	EXOSC6	Homo sapiens exosome component 6 (EXOSC6), mRNA.	-1.81692843057131	5.49583926720162	7.37415192198508e-05	TRUE	kshv-miR-K12-9*
NM_001439	209537_at	TR(1..2905)CDS(338..1330)	2135	EXTL2	Homo sapiens exostoses (multiple)-like 2 (EXTL2), transcript variant 1, mRNA.	-0.896684833596829	8.00983213155536	0.0119907689782920	TRUE	kshv-miR-K12-6-3p,kshv-miR-K12-2,kshv-miR-K12-4-5p
NM_005242	206429_at	TR(1..2876)CDS(155..1348)	2150	F2RL1	Homo sapiens coagulation factor II (thrombin) receptor-like 1 (F2RL1), mRNA.	-1.08949962394357	6.38544023209594	0.002460498514734	TRUE	kshv-miR-K12-1,kshv-miR-K12-7
NM_014613	212108_at,212106_at	TR(1..4515)CDS(54..1391)	23197	FAF2	Homo sapiens Fas associated factor family member 2 (FAF2), mRNA.	-0.556004320492793	8.27113302279772	0.00593645704917927	TRUE	kshv-miR-K12-5,kshv-miR-K12-2,kshv-miR-K12-6-5p,kshv-miR-K12-4-3p,kshv-miR-K12-9*
NM_031208	227960_s_at	TR(1..1705)CDS(7..681)	81889	FAHD1	Homo sapiens fumarylacetoacetate hydrolase domain containing 1 (FAHD1), nuclear gene encoding mitochondrial protein, transcript variant 2, mRNA.	-0.791931195565262	9.39410605840852	0.000237608893384468	TRUE	kshv-miR-K12-1,kshv-miR-K12-3
NM_182705	226905_at,226876_at	TR(1..3895)CDS(65..709)	359845	FAM101B	Homo sapiens family with sequence similarity 101, member B (FAM101B), mRNA.	-0.761827712324106	5.19387426393759	0.0150865939541693	TRUE	kshv-miR-K12-3,kshv-miR-K12-6-5p,kshv-miR-K12-9*
NM_001025780	220285_at,227551_at	TR(1..3153)CDS(603..1469)	51104	FAM108B1	Homo sapiens family with sequence similarity 108, member B1 (FAM108B1), transcript variant 2, mRNA.	-0.739640101950156	6.36424578343204	0.000258894079631269	TRUE	kshv-miR-K12-1
NM_198947	1557129_a_at,1557128_at	TR(1..3489)CDS(192..2396)	374393	FAM111B	Homo sapiens family with sequence similarity 111, member B (FAM111B), mRNA.	-1.34128155734983	3.41787828552873	0.00925816799079492	TRUE	kshv-miR-K12-3
NM_032581	231396_s_at,227239_at,223625_at,244115_at	TR(1..6165)CDS(256..1821)	84668	FAM126A	Homo sapiens family with sequence similarity 126, member A (FAM126A), mRNA.	-0.78385800592898	5.3587802146483	0.0380959158957555	TRUE	kshv-miR-K12-1,kshv-miR-K12-4-3p,kshv-miR-K12-4-5p
NM_032042	212936_at,223882_at	TR(1..4374)CDS(193..1443)	83989	FAM172A	Homo sapiens family with sequence similarity 172, member A (FAM172A), mRNA.	-0.708789601076117	5.16278214163126	0.00059868958853319	TRUE	kshv-miR-K12-2,kshv-miR-K12-3*,kshv-miR-K12-6-5p,kshv-miR-K12-4-5p,kshv-miR-K12-9
NM_032182	212837_at,212835_at	TR(1..3008)CDS(46..1293)	23172	FAM175B	Homo sapiens family with sequence similarity 175, member B (FAM175B), mRNA.	-0.781528439916071	6.91093264680137	0.00094011677119879	TRUE	kshv-miR-K12-3,kshv-miR-K12-4-5p
NM_001135647	218023_s_at	TR(1..4419)CDS(471..1649)	51307	FAM53C	Homo sapiens family with sequence similarity 53, member C (FAM53C), transcript variant 1, mRNA.	-0.694402425657982	8.91927395342714	0.000378090449445152	TRUE	kshv-miR-K12-5,kshv-miR-K12-2,kshv-miR-K12-6-5p,kshv-miR-K12-4-5p
NM_001134456	243011_at,243606_at,217540_at,235030_at	TR(1..8929)CDS(957..2636)	91775	FAM55C	Homo sapiens family with sequence similarity 55, member C (FAM55C), transcript variant 1, mRNA.	-0.655424480070988	5.43211980864599	0.0285901120278009	TRUE	kshv-miR-K12-2,kshv-miR-K12-1,kshv-miR-K12-11,kshv-miR-K12-6-5p,kshv-miR-K12-4-3p,kshv-miR-K12-9*,kshv-miR-K12-7
NM_198549	243042_at	TR(1..5292)CDS(33..1931)	374986	FAM73A	Homo sapiens family with sequence similarity 73, member A (FAM73A), mRNA.	-0.766639858612494	4.81389580595528	0.0112335852579853	TRUE	kshv-miR-K12-1,kshv-miR-K12-4-5p
NM_144664	1553750_a_at,226753_at,232048_at	TR(1..3958)CDS(313..1332)	143684	FAM76B	Homo sapiens family with sequence similarity 76, member B (FAM76B), mRNA.	-0.987410128933185	5.5037204902485	0.0169461275798097	TRUE	kshv-miR-K12-2,kshv-miR-K12-1,kshv-miR-K12-7,kshv-miR-K12-4-5p
NM_033084	242560_at,223545_at	TR(1..5204)CDS(79..4494)	2177	FANCD2	Homo sapiens Fanconi anemia, complementation group D2 (FANCD2), transcript variant 1, mRNA.	-1.17608202808482	6.63325461513762	0.00481244953490765	TRUE	kshv-miR-K12-1,kshv-miR-K12-3,kshv-miR-K12-9*
NM_004629	203564_at	TR(1..2649)CDS(493..2361)	2189	FANCG	Homo sapiens Fanconi anemia, complementation group G (FANCG), mRNA.	-0.629137294073888	8.34346490236517	0.0185738125689412	TRUE	kshv-miR-K12-6-3p,kshv-miR-K12-3,kshv-miR-K12-9*
NM_032228	224865_at,234767_at,224866_at	TR(1..5224)CDS(91..1638)	84188	FAR1	Homo sapiens fatty acyl CoA reductase 1 (FAR1), mRNA.	-0.922418673477429	5.85920584215864	0.00621378491552988	TRUE	kshv-miR-K12-6-3p,kshv-miR-K12-2,kshv-miR-K12-11,kshv-miR-K12-4-3p
NM_152875	204780_s_at,204781_s_at	TR(1..2583)CDS(347..745)	355	FAS	Homo sapiens Fas (TNF receptor superfamily, member 6) (FAS), transcript variant 5, mRNA.	-0.862654963323596	8.21076462494643	0.0493979737151089	TRUE	kshv-miR-K12-1,kshv-miR-K12-3,kshv-miR-K12-9
NM_033632	229419_at,218751_s_at,222729_at	TR(1..3896)CDS(150..2273)	55294	FBXW7	Homo sapiens F-box and WD repeat domain containing 7 (FBXW7), transcript variant 1, mRNA.	-1.42544526643120	7.68417581451466	0.000138237977652893	TRUE	kshv-miR-K12-2
NM_138782	228220_at,1555153_s_at	TR(1..4909)CDS(26..2458)	115548	FCHO2	Homo sapiens FCH domain only 2 (FCHO2), mRNA.	-0.695995225635797	5.4003687793602	0.00176611838909555	TRUE	kshv-miR-K12-3,kshv-miR-K12-4-5p
NM_004462	210950_s_at,208647_at	TR(1..2115)CDS(153..1406)	2222	FDFT1	Homo sapiens farnesyl-diphosphate farnesyltransferase 1 (FDFT1), mRNA.	-0.917154088058002	11.9353996296116	0.00075419548488995	TRUE	kshv-miR-K12-4-3p,kshv-miR-K12-9*,kshv-miR-K12-4-5p
NM_138378	229989_at	TR(1..3053)CDS(298..2172)	91893	FDXACB1	Homo sapiens ferredoxin-fold anticodon binding domain containing 1 (FDXACB1), mRNA.	-0.774330280364267	3.79717915416612	0.0096584163153138	FALSE	kshv-miR-K12-3,kshv-miR-K12-9*
NM_004463	204819_at	TR(1..4291)CDS(735..3620)	2245	FGD1	Homo sapiens FYVE, RhoGEF and PH domain containing 1 (FGD1), mRNA.	-0.789088209505973	5.99761994083272	0.000925497011485085	TRUE	kshv-miR-K12-2
NM_015633	223262_s_at,223263_s_at,1556283_s_at	TR(1..2306)CDS(343..1104)	26127	FGFR1OP2	Homo sapiens FGFR1 oncogene partner 2 (FGFR1OP2), mRNA.	-0.684749445738074	8.02097118389351	3.92896596437298e-05	TRUE	kshv-miR-K12-1,kshv-miR-K12-3,kshv-miR-K12-4-3p,kshv-miR-K12-4-5p
NM_001449	214505_s_at,201540_at,201539_s_at,210299_s_at	TR(1..2398)CDS(209..1051)	2273	FHL1	Homo sapiens four and a half LIM domains 1 (FHL1), mRNA.	-0.721400497994394	9.52593360390483	0.00543041798004539	TRUE	kshv-miR-K12-6-3p,kshv-miR-K12-5,kshv-miR-K12-2,kshv-miR-K12-1,kshv-miR-K12-4-3p,kshv-miR-K12-9*,kshv-miR-K12-4-5p
NM_004117	204560_at,224840_at,224856_at	TR(1..3781)CDS(154..1527)	2289	FKBP5	Homo sapiens FK506 binding protein 5 (FKBP5), mRNA.	-0.828580762970692	7.44705263225377	0.0348151435295981	TRUE	kshv-miR-K12-5,kshv-miR-K12-2,kshv-miR-K12-3,kshv-miR-K12-6-5p,kshv-miR-K12-4-3p,kshv-miR-K12-7
NM_002017	210786_s_at,204236_at,211825_s_at	TR(1..3993)CDS(342..1700)	2313	FLI1	Homo sapiens Friend leukemia virus integration 1 (FLI1), mRNA.	-1.41966522512324	8.64514371455088	0.000494576722888342	TRUE	kshv-miR-K12-6-3p
NM_001136040	217866_at	TR(1..3567)CDS(91..1506)	79869	FLJ12529	Homo sapiens pre-mRNA cleavage factor I, 59 kDa subunit (FLJ12529), mRNA.	-0.625576359454428	7.68393254429125	8.88908439806913e-07	TRUE	kshv-miR-K12-6-5p,kshv-miR-K12-9*
NM_144610	1553292_s_at	TR(1..1433)CDS(33..857)	124923	FLJ25006	Homo sapiens uncharacterized serine/threonine-protein kinase SgK494 (FLJ25006), mRNA.	-0.945378397160489	4.00835913871617	0.0264167946658025	TRUE	kshv-miR-K12-1,kshv-miR-K12-4-3p
NM_138439	226079_at	TR(1..897)CDS(250..672)	114984	FLYWCH2	Homo sapiens FLYWCH family member 2 (FLYWCH2), mRNA.	-0.966898742918775	5.41017282471767	0.0265276807082592	FALSE	kshv-miR-K12-5
NM_175736	238823_at,232249_at,227844_at	TR(1..11192)CDS(235..3318)	91010	FMNL3	Homo sapiens formin-like 3 (FMNL3), transcript variant 1, mRNA.	-0.615968289253627	2.75013272387346	0.0102172779154220	TRUE	kshv-miR-K12-2,kshv-miR-K12-3,kshv-miR-K12-9,kshv-miR-K12-6-3p,kshv-miR-K12-5,kshv-miR-K12-6-5p,kshv-miR-K12-4-5p,kshv-miR-K12-9*
NM_001008738	228250_at,228768_at,223997_at	TR(1..6571)CDS(143..3559)	96459	FNIP1	Homo sapiens folliculin interacting protein 1 (FNIP1), transcript variant 2, mRNA.	-0.627390329068703	6.20575723632813	0.000163370952744866	TRUE	kshv-miR-K12-6-3p,kshv-miR-K12-11,kshv-miR-K12-3,kshv-miR-K12-6-5p,kshv-miR-K12-4-3p,kshv-miR-K12-9*
NM_014489	41858_at,215293_s_at	TR(1..2040)CDS(129..1076)	27315	FRAG1	Homo sapiens FGF receptor activating protein 1 (FRAG1), mRNA.	-0.526929742836323	5.73843320283688	0.00733329072116283	TRUE	kshv-miR-K12-1,kshv-miR-K12-6-5p
NM_174938	230645_at,242600_at	TR(1..2529)CDS(203..1996)	257019	FRMD3	Homo sapiens FERM domain containing 3 (FRMD3), mRNA.	-1.07804475851331	3.13570591381606	8.01546852617895e-06	TRUE	kshv-miR-K12-4-5p
NM_015123	213056_at	TR(1..5261)CDS(291..3395)	23150	FRMD4B	Homo sapiens FERM domain containing 4B (FRMD4B), mRNA.	-1.71934069500947	8.31316061211533	2.27506439216265e-05	TRUE	kshv-miR-K12-5,kshv-miR-K12-1,kshv-miR-K12-4-3p
NM_023037	204072_s_at,214318_s_at	TR(1..10718)CDS(497..9538)	10129	FRY	Homo sapiens furry homolog (Drosophila) (FRY), mRNA.	-1.06978714167487	3.62767209889219	0.000381812986923890	TRUE	kshv-miR-K12-1,kshv-miR-K12-6-5p
NM_003902	203091_at	TR(1..2884)CDS(90..2024)	8880	FUBP1	Homo sapiens far upstream element (FUSE) binding protein 1 (FUBP1), mRNA.	-0.744575581441348	7.29976817318048	0.00193327262521091	TRUE	kshv-miR-K12-2,kshv-miR-K12-11
NM_003934	212824_at	TR(1..3175)CDS(109..1827)	8939	FUBP3	Homo sapiens far upstream element (FUSE) binding protein 3 (FUBP3), mRNA.	-0.500024613520387	10.1414452201296	0.00383326427981500	TRUE	kshv-miR-K12-3,kshv-miR-K12-4-3p,kshv-miR-K12-4-5p
NM_178156	1554930_a_at,203988_s_at	TR(1..3677)CDS(1100..2827)	2530	FUT8	Homo sapiens fucosyltransferase 8 (alpha (1,6) fucosyltransferase) (FUT8), transcript variant 3, mRNA.	-0.921112259976463	9.17582146067922	5.59203839585274e-05	TRUE	kshv-miR-K12-9*,kshv-miR-K12-9
NM_032288	224642_at,224641_at	TR(1..3542)CDS(161..1117)	84248	FYTTD1	Homo sapiens forty-two-three domain containing 1 (FYTTD1), transcript variant 1, mRNA.	-0.740338827902857	8.47828084536545	0.00720100694137019	TRUE	kshv-miR-K12-2,kshv-miR-K12-1,kshv-miR-K12-11,kshv-miR-K12-3
NM_012193	224337_s_at,218665_at	TR(1..7391)CDS(307..1920)	8322	FZD4	Homo sapiens frizzled homolog 4 (Drosophila) (FZD4), mRNA.	-0.527356352738835	6.73776886611023	0.0161106428227946	TRUE	kshv-miR-K12-6-3p,kshv-miR-K12-5,kshv-miR-K12-2,kshv-miR-K12-1,kshv-miR-K12-3,kshv-miR-K12-6-5p,kshv-miR-K12-9*,kshv-miR-K12-4-5p
NM_005754	201514_s_at	TR(1..2855)CDS(172..1572)	10146	G3BP1	Homo sapiens GTPase activating protein (SH3 domain) binding protein 1 (G3BP1), transcript variant 1, mRNA.	-1.92948751873051	8.7989114326644	6.14394358388566e-06	TRUE	kshv-miR-K12-1,kshv-miR-K12-4-3p
NM_012297	208840_s_at,208841_s_at,206383_s_at	TR(1..4275)CDS(166..1614)	9908	G3BP2	Homo sapiens GTPase activating protein (SH3 domain) binding protein 2 (G3BP2), transcript variant 2, mRNA.	-1.10628105233505	8.39095557882085	0.00183498859007685	TRUE	kshv-miR-K12-2,kshv-miR-K12-11,kshv-miR-K12-3,kshv-miR-K12-6-5p,kshv-miR-K12-4-3p,kshv-miR-K12-9*
NM_020474	1568618_a_at,201724_s_at,201723_s_at,201722_s_at	TR(1..3778)CDS(32..1711)	2589	GALNT1	Homo sapiens UDP-N-acetyl-alpha-D-galactosamine:polypeptide N-acetylgalactosaminyltransferase 1 (GalNAc-T1) (GALNT1), mRNA.	-1.52197219972546	8.96266766880493	8.27610889225593e-07	TRUE	kshv-miR-K12-2,kshv-miR-K12-3,kshv-miR-K12-6-5p,kshv-miR-K12-9
NM_052917	234472_at,243779_at,236536_at	TR(1..5674)CDS(568..2238)	114805	GALNT13	Homo sapiens UDP-N-acetyl-alpha-D-galactosamine:polypeptide N-acetylgalactosaminyltransferase 13 (GalNAc-T13) (GALNT13), mRNA.	-0.716658495479692	3.28595371560935	2.42315693649530e-06	TRUE	kshv-miR-K12-11,kshv-miR-K12-3,kshv-miR-K12-4-3p,kshv-miR-K12-4-5p
NM_003774	220442_at,231832_at	TR(1..5360)CDS(210..1946)	8693	GALNT4	Homo sapiens UDP-N-acetyl-alpha-D-galactosamine:polypeptide N-acetylgalactosaminyltransferase 4 (GalNAc-T4) (GALNT4), mRNA.	-0.793915515051862	3.74619418491464	0.000286685044953074	TRUE	kshv-miR-K12-2,kshv-miR-K12-1,kshv-miR-K12-3,kshv-miR-K12-6-5p,kshv-miR-K12-9*,kshv-miR-K12-4-5p,kshv-miR-K12-9
NM_017423	222587_s_at,218313_s_at	TR(1..4339)CDS(84..2057)	51809	GALNT7	Homo sapiens UDP-N-acetyl-alpha-D-galactosamine:polypeptide N-acetylgalactosaminyltransferase 7 (GalNAc-T7) (GALNT7), mRNA.	-0.552696736785569	10.1928700944233	0.0441483830483688	TRUE	kshv-miR-K12-1,kshv-miR-K12-6-5p
NM_020699	225393_at,238076_at	TR(1..7480)CDS(245..2026)	57459	GATAD2B	Homo sapiens GATA zinc finger domain containing 2B (GATAD2B), mRNA.	-0.690362376597751	4.05038090907566	0.00558647255273446	FALSE	kshv-miR-K12-11,kshv-miR-K12-3,kshv-miR-K12-6-5p,kshv-miR-K12-4-3p,kshv-miR-K12-9*,kshv-miR-K12-7
NM_014635	202832_at	TR(1..6833)CDS(314..5065)	9648	GCC2	Homo sapiens GRIP and coiled-coil domain containing 2 (GCC2), transcript variant 2, mRNA.	-1.09354758987094	7.0185989409862	0.00190467163715628	TRUE	kshv-miR-K12-6-5p
NM_002061	203925_at,236140_at	TR(1..3074)CDS(294..1118)	2730	GCLM	Homo sapiens glutamate-cysteine ligase, modifier subunit (GCLM), mRNA.	-0.533431699523095	7.90409932264264	0.0461888537133393	TRUE	kshv-miR-K12-1,kshv-miR-K12-4-3p,kshv-miR-K12-9*,kshv-miR-K12-4-5p
NM_001018090	228568_at	TR(1..4664)CDS(120..1772)	145781	GCOM1	Homo sapiens GRINL1A complex locus (GCOM1), transcript variant 1, mRNA.	-0.511434226228743	6.36863451439359	0.0278875036922775	TRUE	kshv-miR-K12-1,kshv-miR-K12-3,kshv-miR-K12-9*
NM_017686	1554154_at,219473_at	TR(1..8885)CDS(300..1793)	54834	GDAP2	Homo sapiens ganglioside induced differentiation associated protein 2 (GDAP2), transcript variant 1, mRNA.	-0.830659240540826	5.18989378195926	0.00160205512722226	TRUE	kshv-miR-K12-2,kshv-miR-K12-11,kshv-miR-K12-3,kshv-miR-K12-4-3p,kshv-miR-K12-9*,kshv-miR-K12-4-5p
NM_001111270	227427_at	TR(1..2308)CDS(38..1897)	115557	GEFT	Homo sapiens RhoA/RAC/CDC42 exchange factor (GEFT), transcript variant 3, mRNA.	-0.577045114476647	4.44753912322884	0.0160929493034208	FALSE	kshv-miR-K12-9*
NM_182625	228286_at	TR(1..6226)CDS(74..2800)	348654	GEN1	Homo sapiens Gen homolog 1, endonuclease (Drosophila) (GEN1), transcript variant 1, mRNA.	-1.69994201370713	5.70506563002566	0.0356517250133425	TRUE	kshv-miR-K12-6-3p,kshv-miR-K12-2,kshv-miR-K12-11,kshv-miR-K12-3,kshv-miR-K12-6-5p,kshv-miR-K12-9*,kshv-miR-K12-9
NM_015044	210658_s_at,208914_at,208913_at,208915_s_at	TR(1..5203)CDS(77..1918)	23062	GGA2	Homo sapiens golgi associated, gamma adaptin ear containing, ARF binding protein 2 (GGA2), mRNA.	-0.713147927178277	6.46808285623939	0.0345329477947389	TRUE	kshv-miR-K12-2,kshv-miR-K12-1,kshv-miR-K12-3,kshv-miR-K12-6-5p,kshv-miR-K12-4-3p,kshv-miR-K12-9*,kshv-miR-K12-7
NM_024711	219777_at,229367_s_at	TR(1..3660)CDS(425..1303)	474344	GIMAP6	Homo sapiens GTPase, IMAP family member 6 (GIMAP6), transcript variant 1, mRNA.	-1.59743603123891	6.39174167821567	0.00108943482574548	TRUE	kshv-miR-K12-6-3p,kshv-miR-K12-4-3p,kshv-miR-K12-9*
NM_153236	228071_at	TR(1..1242)CDS(131..1033)	168537	GIMAP7	Homo sapiens GTPase, IMAP family member 7 (GIMAP7), mRNA.	-1.25812568324757	4.61449616199445	0.00958292392244581	TRUE	kshv-miR-K12-3
NM_021067	206102_at	TR(1..3289)CDS(135..725)	9837	GINS1	Homo sapiens GINS complex subunit 1 (Psf1 homolog) (GINS1), mRNA.	-0.968602935336142	10.3623044653419	0.0454689702234847	TRUE	kshv-miR-K12-2,kshv-miR-K12-1,kshv-miR-K12-9*
NM_173601	226868_at,232021_at	TR(1..7509)CDS(226..1548)	283464	GLT8D3	Homo sapiens glycosyltransferase 8 domain containing 3 (GLT8D3), transcript variant 1, mRNA.	-1.34482815975513	6.4578425802841	0.00357513913454781	TRUE	kshv-miR-K12-2,kshv-miR-K12-1,kshv-miR-K12-11,kshv-miR-K12-3,kshv-miR-K12-4-3p
NM_002069	227692_at,209576_at	TR(1..3318)CDS(338..1402)	2770	GNAI1	Homo sapiens guanine nucleotide binding protein (G protein), alpha inhibiting activity polypeptide 1 (GNAI1), mRNA.	-0.856908889854133	6.37305050856064	0.000389526563252422	TRUE	kshv-miR-K12-6-3p,kshv-miR-K12-2,kshv-miR-K12-1,kshv-miR-K12-3,kshv-miR-K12-9*
NM_004126	204115_at	TR(1..964)CDS(435..656)	2791	GNG11	Homo sapiens guanine nucleotide binding protein (G protein), gamma 11 (GNG11), mRNA.	-1.80023526705875	10.2433454759923	3.12705447721674e-06	TRUE	kshv-miR-K12-5
NM_019067	220716_at,205010_at,222109_at,46947_at	TR(1..6826)CDS(140..1888)	54552	GNL3L	Homo sapiens guanine nucleotide binding protein-like 3 (nucleolar)-like (GNL3L), mRNA.	-0.985725629025287	5.31684714842946	0.000301556759353838	TRUE	kshv-miR-K12-5,kshv-miR-K12-2,kshv-miR-K12-1,kshv-miR-K12-11,kshv-miR-K12-9*,kshv-miR-K12-4-5p
NM_022913	223705_s_at,224648_at	TR(1..3543)CDS(1275..2696)	65056	GPBP1	Homo sapiens GC-rich promoter binding protein 1 (GPBP1), transcript variant 1, mRNA.	-0.512925363269577	8.35124917981182	0.000113417250935551	TRUE	kshv-miR-K12-3
NM_001098518	212950_at	TR(1..5822)CDS(290..4330)	221395	GPR116	Homo sapiens G protein-coupled receptor 116 (GPR116), transcript variant 2, mRNA.	-1.42514779030581	5.46464389176688	0.00327721018470925	TRUE	kshv-miR-K12-4-3p
NM_024911	228950_s_at,221958_s_at,228949_at	TR(1..2767)CDS(272..1897)	79971	GPR177	Homo sapiens G protein-coupled receptor 177 (GPR177), transcript variant 1, mRNA.	-0.582403571676817	9.29314037124963	1.69987056454174e-05	TRUE	kshv-miR-K12-9*,kshv-miR-K12-9
NM_013296	221922_at,205240_at	TR(1..3039)CDS(497..2551)	29899	GPSM2	Homo sapiens G-protein signaling modulator 2 (AGS3-like, C. elegans) (GPSM2), mRNA.	-1.02773180483138	7.15060905900286	0.0265381253048684	TRUE	kshv-miR-K12-1,kshv-miR-K12-11
NM_005308	204395_s_at,204396_s_at	TR(1..2575)CDS(234..2006)	2869	GRK5	Homo sapiens G protein-coupled receptor kinase 5 (GRK5), mRNA.	-1.65936375503922	6.43119171223833	0.00145025526202762	TRUE	kshv-miR-K12-3
NM_152407	238427_at,226881_at	TR(1..4105)CDS(127..804)	134266	GRPEL2	Homo sapiens GrpE-like 2, mitochondrial (E. coli) (GRPEL2), nuclear gene encoding mitochondrial protein, mRNA.	-0.810444301953282	5.84663670130586	2.10422926514748e-05	TRUE	kshv-miR-K12-2,kshv-miR-K12-1,kshv-miR-K12-3,kshv-miR-K12-4-3p,kshv-miR-K12-9
NM_001127667	214040_s_at,200696_s_at	TR(1..2747)CDS(250..2478)	2934	GSN	Homo sapiens gelsolin (amyloidosis, Finnish type) (GSN), transcript variant 8, mRNA.	-0.973575615624538	5.82701646727423	0.000288071047470680	TRUE	kshv-miR-K12-2
NM_001130007	217595_at,234975_at,225276_at,201912_s_at	TR(1..7190)CDS(684..2183)	2935	GSPT1	Homo sapiens G1 to S phase transition 1 (GSPT1), transcript variant 3, mRNA.	-0.789760536247565	7.18737332144822	0.000125038694435808	TRUE	kshv-miR-K12-5,kshv-miR-K12-1,kshv-miR-K12-3,kshv-miR-K12-9*,kshv-miR-K12-4-5p
NM_033000	210892_s_at	TR(1..4469)CDS(371..3307)	2969	GTF2I	Homo sapiens general transcription factor II, i (GTF2I), transcript variant 2, mRNA.	-1.45995338653562	5.81234998909982	0.00236210968992178	TRUE	kshv-miR-K12-6-3p,kshv-miR-K12-9*
NM_016315	204237_at,215913_s_at,204235_s_at	TR(1..3464)CDS(622..1536)	51454	GULP1	Homo sapiens GULP, engulfment adaptor PTB domain containing 1 (GULP1), mRNA.	-0.960825901809663	8.6470547560833	7.48682134118186e-05	TRUE	kshv-miR-K12-1,kshv-miR-K12-3
NM_005318	208886_at	TR(1..2336)CDS(439..1023)	3005	H1F0	Homo sapiens H1 histone family, member 0 (H1F0), mRNA.	-0.98448616397837	10.5668433864165	0.00817368439817076	TRUE	kshv-miR-K12-1,kshv-miR-K12-9*
NM_201517	212205_at,212206_s_at	TR(1..1315)CDS(156..428)	94239	H2AFV	Homo sapiens H2A histone family, member V (H2AFV), transcript variant 5, mRNA.	-0.810295273401063	7.7505973378641	0.00758083270152474	TRUE	kshv-miR-K12-1
NM_012260	223211_at	TR(1..2037)CDS(161..1897)	26061	HACL1	Homo sapiens 2-hydroxyacyl-CoA lyase 1 (HACL1), mRNA.	-0.97145514872678	10.6603865176652	0.000393642884951998	TRUE	kshv-miR-K12-2
NM_006620	209314_s_at,209316_s_at,209315_at,240602_at	TR(1..7163)CDS(208..2262)	10767	HBS1L	Homo sapiens HBS1-like (S. cerevisiae) (HBS1L), mRNA.	-1.26881016995815	4.75618391864842	6.41771362966548e-05	TRUE	kshv-miR-K12-6-3p,kshv-miR-K12-2,kshv-miR-K12-1,kshv-miR-K12-11,kshv-miR-K12-9*,kshv-miR-K12-7,kshv-miR-K12-4-5p
NM_014320	203430_at	TR(1..1282)CDS(298..915)	23593	HEBP2	Homo sapiens heme binding protein 2 (HEBP2), mRNA.	-1.25769824007973	4.14727045179757	7.84999635046013e-05	TRUE	kshv-miR-K12-1
NM_015382	242349_at,224481_s_at,241683_at,1557100_s_at,241955_at	TR(1..9134)CDS(490..8322)	25831	HECTD1	Homo sapiens HECT domain containing 1 (HECTD1), mRNA.	-0.939365313565168	5.66125378688655	1.76087531871890e-05	TRUE	kshv-miR-K12-2,kshv-miR-K12-1,kshv-miR-K12-4-3p
NM_182765	227568_at	TR(1..4826)CDS(101..2431)	143279	HECTD2	Homo sapiens HECT domain containing 2 (HECTD2), transcript variant 1, mRNA.	-0.698618308758633	5.97050896817999	0.000599060840795375	TRUE	kshv-miR-K12-5,kshv-miR-K12-11
NM_018063	223556_at	TR(1..3165)CDS(106..2622)	3070	HELLS	Homo sapiens helicase, lymphoid-specific (HELLS), mRNA.	-0.866935241470229	8.73773220628325	0.0208999793712035	TRUE	kshv-miR-K12-4-3p
NM_003325	217427_s_at	TR(1..4013)CDS(221..3274)	7290	HIRA	Homo sapiens HIR histone cell cycle regulation defective homolog A (S. cerevisiae) (HIRA), mRNA.	-1.01283998409899	8.3413413064127	0.00463466731540279	TRUE	kshv-miR-K12-6-5p
NM_018200	218152_at	TR(1..3898)CDS(202..1245)	10363	HMG20A	Homo sapiens high-mobility group 20A (HMG20A), mRNA.	-0.775502539181128	8.81496716001975	7.67258911297296e-07	TRUE	kshv-miR-K12-6-3p,kshv-miR-K12-2,kshv-miR-K12-6-5p,kshv-miR-K12-9*
NM_002129	208808_s_at	TR(1..1527)CDS(194..823)	3148	HMGB2	Homo sapiens high-mobility group box 2 (HMGB2), transcript variant 1, mRNA.	-1.18374241696504	12.8492247766377	0.00182849233859609	TRUE	kshv-miR-K12-3
NM_005342	225601_at	TR(1..3556)CDS(93..695)	3149	HMGB3	Homo sapiens high-mobility group box 3 (HMGB3), mRNA.	-0.98082009352271	5.0327615060487	0.00163795503252732	TRUE	kshv-miR-K12-2,kshv-miR-K12-11,kshv-miR-K12-3,kshv-miR-K12-6-5p,kshv-miR-K12-9*,kshv-miR-K12-4-5p
NM_001130996	202540_s_at,202539_s_at	TR(1..4430)CDS(157..2664)	3156	HMGCR	Homo sapiens 3-hydroxy-3-methylglutaryl-Coenzyme A reductase (HMGCR), transcript variant 2, mRNA.	-1.35874541462626	8.33050654232763	4.02376665529589e-05	TRUE	kshv-miR-K12-11,kshv-miR-K12-4-3p,kshv-miR-K12-9*
NM_194247	211930_at	TR(1..5808)CDS(107..1243)	220988	HNRNPA3	Homo sapiens heterogeneous nuclear ribonucleoprotein A3 (HNRNPA3), mRNA.	-1.92616554759850	7.77803055703629	0.000213406311531419	TRUE	kshv-miR-K12-2,kshv-miR-K12-1,kshv-miR-K12-11,kshv-miR-K12-6-5p,kshv-miR-K12-4-3p
NM_002138	209330_s_at,221480_at	TR(1..2110)CDS(319..1239)	3184	HNRNPD	Homo sapiens heterogeneous nuclear ribonucleoprotein D (AU-rich element RNA binding protein 1, 37kDa) (HNRNPD), transcript variant 3, mRNA.	-0.88798507963112	10.2864089954449	0.00431648429311702	TRUE	kshv-miR-K12-4-5p
NM_001098204	201376_s_at	TR(1..2650)CDS(365..1612)	3185	HNRNPF	Homo sapiens heterogeneous nuclear ribonucleoprotein F (HNRNPF), transcript variant 2, mRNA.	-1.02207150907382	9.20090208394507	2.57494819815394e-05	TRUE	kshv-miR-K12-9*
NM_031372	209068_at,1554678_s_at	TR(1..3510)CDS(536..1798)	9987	HNRPDL	Homo sapiens heterogeneous nuclear ribonucleoprotein D-like (HNRPDL), transcript variant 2, mRNA.	-0.926100400143044	8.84710775232607	0.00805836879603396	TRUE	kshv-miR-K12-5,kshv-miR-K12-1,kshv-miR-K12-3,kshv-miR-K12-6-5p
NM_032410	226395_at,236192_at,224359_s_at,1558315_s_at	TR(1..14460)CDS(243..2399)	84376	HOOK3	Homo sapiens hook homolog 3 (Drosophila) (HOOK3), mRNA.	-0.732311637201983	4.69262121422686	0.0259867001073832	TRUE	kshv-miR-K12-5,kshv-miR-K12-2,kshv-miR-K12-1,kshv-miR-K12-11,kshv-miR-K12-9*,kshv-miR-K12-4-5p
NM_001098211	205580_s_at,205579_at	TR(1..4348)CDS(113..1576)	3269	HRH1	Homo sapiens histamine receptor H1 (HRH1), transcript variant 3, mRNA.	-0.586115749573605	5.26067965210598	0.00273010886452175	TRUE	kshv-miR-K12-6-3p,kshv-miR-K12-3,kshv-miR-K12-9
NM_012262	203283_s_at,230465_at,203284_s_at,203285_s_at	TR(1..6770)CDS(386..1456)	9653	HS2ST1	Homo sapiens heparan sulfate 2-O-sulfotransferase 1 (HS2ST1), transcript variant 1, mRNA.	-0.898134915635532	6.46188125253147	7.11324778279185e-05	TRUE	kshv-miR-K12-6-3p,kshv-miR-K12-2,kshv-miR-K12-1,kshv-miR-K12-11,kshv-miR-K12-3,kshv-miR-K12-4-3p,kshv-miR-K12-4-5p
NM_033158	206855_s_at	TR(1..1992)CDS(221..1642)	8692	HYAL2	Homo sapiens hyaluronoglucosaminidase 2 (HYAL2), transcript variant 2, mRNA.	-0.974622935476112	9.99163625314359	0.0206204070146536	TRUE	kshv-miR-K12-9*
NM_000629	225669_at,225661_at,204191_at	TR(1..6099)CDS(148..1821)	3454	IFNAR1	Homo sapiens interferon (alpha, beta and omega) receptor 1 (IFNAR1), mRNA.	-0.699848796315085	4.34268200805429	0.0285309653811917	TRUE	kshv-miR-K12-8,kshv-miR-K12-5,kshv-miR-K12-1,kshv-miR-K12-11,kshv-miR-K12-6-5p,kshv-miR-K12-9*
NM_176891	1553574_at	TR(1..1502)CDS(621..1247)	338376	IFNE1	Homo sapiens interferon epsilon 1 (IFNE1), mRNA.	-1.13581357989133	4.06929510227643	3.46927098814845e-07	TRUE	kshv-miR-K12-4-3p
NM_020800	226098_at,1558956_s_at	TR(1..4314)CDS(434..2767)	57560	IFT80	Homo sapiens intraflagellar transport 80 homolog (Chlamydomonas) (IFT80), mRNA.	-0.91448003902769	8.13605258529836	0.0116304286001385	TRUE	kshv-miR-K12-11
NM_031473	223736_at,219372_at	TR(1..2906)CDS(385..1680)	28981	IFT81	Homo sapiens intraflagellar transport 81 homolog (Chlamydomonas) (IFT81), transcript variant 2, mRNA.	-0.671651567665877	4.23061080021593	0.00252377805912279	TRUE	kshv-miR-K12-3,kshv-miR-K12-4-5p,kshv-miR-K12-9
NM_175767	204864_s_at,211000_s_at	TR(1..3159)CDS(256..1245)	3572	IL6ST	Homo sapiens interleukin 6 signal transducer (gp130, oncostatin M receptor) (IL6ST), transcript variant 2, mRNA.	-1.33506467533920	3.92086421651623	7.07007727277613e-07	TRUE	kshv-miR-K12-6-3p,kshv-miR-K12-1,kshv-miR-K12-3,kshv-miR-K12-4-3p
NM_004516	217805_at,208931_s_at,208930_s_at,211375_s_at,217804_s_at	TR(1..3677)CDS(267..2375)	3609	ILF3	Homo sapiens interleukin enhancer binding factor 3, 90kDa (ILF3), transcript variant 2, mRNA.	-0.542791380285878	8.62688722677183	0.000794202548612932	TRUE	kshv-miR-K12-11,kshv-miR-K12-6-5p,kshv-miR-K12-4-5p
NM_017553	225357_s_at	TR(1..6249)CDS(214..4884)	54617	INO80	Homo sapiens INO80 homolog (S. cerevisiae) (INO80), mRNA.	-0.594804248997146	4.39948973534363	0.0025172795930118	TRUE	kshv-miR-K12-5,kshv-miR-K12-3
NM_194281	229582_at	TR(1..987)CDS(118..696)	125476	INO80C	Homo sapiens INO80 complex subunit C (INO80C), transcript variant 2, mRNA.	-1.52777310024862	9.592301809987	1.68328477783380e-07	TRUE	kshv-miR-K12-6-5p
NM_173618	227286_at	TR(1..1185)CDS(102..836)	283899	INO80E	Homo sapiens INO80 complex subunit E (INO80E), mRNA.	-0.866010265659758	7.61379485877508	0.00334352429752527	TRUE	kshv-miR-K12-6-5p
NM_005539	1554757_a_at,203006_at	TR(1..2938)CDS(249..1487)	3632	INPP5A	Homo sapiens inositol polyphosphate-5-phosphatase, 40kDa (INPP5A), mRNA.	-1.12643003485702	7.09495128399568	0.009148392713071	TRUE	kshv-miR-K12-11,kshv-miR-K12-3,kshv-miR-K12-6-5p,kshv-miR-K12-9*
NM_032594	240841_at	TR(1..3024)CDS(212..1912)	84684	INSM2	Homo sapiens insulinoma-associated 2 (INSM2), mRNA.	-0.805135437399848	3.09014312022519	0.00849453832750189	TRUE	kshv-miR-K12-8,kshv-miR-K12-1
NM_023015	202809_s_at	TR(1..4538)CDS(545..3673)	65123	INTS3	Homo sapiens integrator complex subunit 3 (INTS3), mRNA.	-0.649031347389116	7.84909090313905	0.0456296605173074	TRUE	kshv-miR-K12-1,kshv-miR-K12-7
NM_016338	234304_s_at,222659_at	TR(1..4420)CDS(191..3118)	51194	IPO11	Homo sapiens importin 11 (IPO11), transcript variant 2, mRNA.	-0.65325390569065	7.6470756584024	0.00201783823126121	TRUE	kshv-miR-K12-2,kshv-miR-K12-6-5p
NM_006390	205701_at,225528_at	TR(1..5178)CDS(171..3284)	10526	IPO8	Homo sapiens importin 8 (IPO8), mRNA.	-0.93265082279138	7.58711024615845	1.08348405365687e-05	TRUE	kshv-miR-K12-3,kshv-miR-K12-6-5p
NM_001023570	211707_s_at	TR(1..2594)CDS(216..2012)	9657	IQCB1	Homo sapiens IQ motif containing B1 (IQCB1), transcript variant 1, mRNA.	-0.725742316429031	6.86696212028505	0.00618023299120542	TRUE	kshv-miR-K12-5,kshv-miR-K12-3,kshv-miR-K12-4-3p
NM_003870	200791_s_at,210840_s_at,213446_s_at	TR(1..7219)CDS(102..5075)	8826	IQGAP1	Homo sapiens IQ motif containing GTPase activating protein 1 (IQGAP1), mRNA.	-0.521018178476122	8.57178730615	0.00737609904267652	TRUE	kshv-miR-K12-6-5p,kshv-miR-K12-4-3p,kshv-miR-K12-4-5p
NM_001570	231779_at,1553740_a_at	TR(1..3469)CDS(77..1954)	3656	IRAK2	Homo sapiens interleukin-1 receptor-associated kinase 2 (IRAK2), mRNA.	-1.11116479867588	6.13336001142405	9.73913380137454e-05	TRUE	kshv-miR-K12-7
NM_002199	203275_at	TR(1..2302)CDS(201..1250)	3660	IRF2	Homo sapiens interferon regulatory factor 2 (IRF2), mRNA.	-0.667115890169309	6.1042749356248	0.00782781130943005	TRUE	kshv-miR-K12-3
NM_032039	224749_at	TR(1..2939)CDS(165..1823)	83986	ITFG3	Homo sapiens integrin alpha FG-GAP repeat containing 3 (ITFG3), mRNA.	-0.735648292650411	5.92671667068831	0.0465757243428623	TRUE	kshv-miR-K12-5,kshv-miR-K12-6-5p,kshv-miR-K12-9*
NM_003637	206766_at	TR(1..5189)CDS(77..3580)	8515	ITGA10	Homo sapiens integrin, alpha 10 (ITGA10), mRNA.	-1.60819467397262	7.86764269103849	3.18627376897737e-05	TRUE	kshv-miR-K12-11,kshv-miR-K12-6-5p,kshv-miR-K12-7
NM_002213	201125_s_at	TR(1..3392)CDS(298..2697)	3693	ITGB5	Homo sapiens integrin, beta 5 (ITGB5), mRNA.	-0.543857605471347	8.92872869502313	0.0322731916585057	TRUE	kshv-miR-K12-1
NM_002221	203723_at	TR(1..6162)CDS(341..3181)	3707	ITPKB	Homo sapiens inositol 1,4,5-trisphosphate 3-kinase B (ITPKB), mRNA.	-1.52784396267260	5.84989598646495	0.000192313412958203	TRUE	kshv-miR-K12-6-3p,kshv-miR-K12-1,kshv-miR-K12-6-5p,kshv-miR-K12-9*,kshv-miR-K12-7
NM_002227	1552611_a_at,201648_at,1552610_a_at	TR(1..5053)CDS(250..3714)	3716	JAK1	Homo sapiens Janus kinase 1 (a protein tyrosine kinase) (JAK1), mRNA.	-0.496603458584409	8.59580445384563	0.00161058192783680	TRUE	kshv-miR-K12-6-3p,kshv-miR-K12-2,kshv-miR-K12-3,kshv-miR-K12-4-3p,kshv-miR-K12-9*
NM_004972	205841_at,205842_s_at	TR(1..5097)CDS(495..3893)	3717	JAK2	Homo sapiens Janus kinase 2 (a protein tyrosine kinase) (JAK2), mRNA.	-0.76189659448977	4.35839495195266	0.00195645339744172	TRUE	kshv-miR-K12-1,kshv-miR-K12-11,kshv-miR-K12-3,kshv-miR-K12-6-5p
NM_032801	231721_at,231720_s_at	TR(1..3675)CDS(25..1092)	83700	JAM3	Homo sapiens junctional adhesion molecule 3 (JAM3), mRNA.	-1.80253163076970	4.26179514955592	1.20689775048086e-06	TRUE	kshv-miR-K12-5,kshv-miR-K12-1,kshv-miR-K12-3,kshv-miR-K12-6-5p,kshv-miR-K12-9
NM_004241	230007_at,221763_at,241661_at,224933_s_at	TR(1..8415)CDS(665..7576)	221037	JMJD1C	Homo sapiens jumonji domain containing 1C (JMJD1C), transcript variant 2, mRNA.	-0.519990254966039	5.7632731072063	0.029832306602731	TRUE	kshv-miR-K12-6-3p,kshv-miR-K12-3
NM_016506	223765_s_at,218570_at,218569_s_at	TR(1..2468)CDS(172..1728)	55709	KBTBD4	Homo sapiens kelch repeat and BTB (POZ) domain containing 4 (KBTBD4), transcript variant 2, mRNA.	-0.758459288885885	6.03306231788033	0.00169336451263031	TRUE	kshv-miR-K12-6-5p
NM_138444	212188_at,212192_at	TR(1..6255)CDS(258..1235)	115207	KCTD12	Homo sapiens potassium channel tetramerisation domain containing 12 (KCTD12), mRNA.	-1.75081015847543	5.26350786465364	0.00309217382655263	TRUE	kshv-miR-K12-6-3p,kshv-miR-K12-1,kshv-miR-K12-6-5p,kshv-miR-K12-4-3p,kshv-miR-K12-9*
NM_016121	217894_at	TR(1..3946)CDS(295..2742)	51133	KCTD3	Homo sapiens potassium channel tetramerisation domain containing 3 (KCTD3), mRNA.	-1.29086882886903	7.72662163065081	0.0185515771665081	TRUE	kshv-miR-K12-11,kshv-miR-K12-3,kshv-miR-K12-6-5p
NM_006801	200922_at,1555575_a_at	TR(1..1575)CDS(196..834)	10945	KDELR1	Homo sapiens KDEL (Lys-Asp-Glu-Leu) endoplasmic reticulum protein retention receptor 1 (KDELR1), mRNA.	-0.78602978505377	8.40983520334605	0.00744165212171264	TRUE	kshv-miR-K12-3*
NM_001080394	212523_s_at	TR(1..3220)CDS(10..2757)	23514	KIAA0146	Homo sapiens KIAA0146 (KIAA0146), mRNA.	-1.33887844487546	5.85069550125665	5.31597778761603e-05	TRUE	kshv-miR-K12-2,kshv-miR-K12-1
NM_001100590	232366_at,212441_at	TR(1..7789)CDS(380..4567)	9778	KIAA0232	Homo sapiens KIAA0232 (KIAA0232), transcript variant 2, mRNA.	-1.00160697601470	5.94147608701561	0.00476533643247254	TRUE	kshv-miR-K12-6-3p,kshv-miR-K12-2,kshv-miR-K12-1,kshv-miR-K12-6-5p,kshv-miR-K12-4-3p,kshv-miR-K12-9*
NM_014774	201775_s_at,201778_s_at,201776_s_at,201777_s_at	TR(1..5794)CDS(978..2465)	9813	KIAA0494	Homo sapiens KIAA0494 (KIAA0494), mRNA.	-0.566067407076663	6.30277457751411	0.0406795340274492	TRUE	kshv-miR-K12-2,kshv-miR-K12-3,kshv-miR-K12-6-5p,kshv-miR-K12-9*,kshv-miR-K12-9
NM_015038	215268_at	TR(1..6979)CDS(763..5046)	643314	KIAA0754	Homo sapiens hypothetical LOC643314 (KIAA0754), mRNA.	-0.559171423396035	3.78848477951344	0.00655903114274137	TRUE	kshv-miR-K12-3,kshv-miR-K12-9*
NM_015323	212634_at,212633_at	TR(1..4219)CDS(49..2433)	23376	KIAA0776	Homo sapiens KIAA0776 (KIAA0776), mRNA.	-1.23705345987589	7.96521199953745	0.00679180318628054	TRUE	kshv-miR-K12-11,kshv-miR-K12-4-3p
NM_014895	206006_s_at,206005_s_at	TR(1..5155)CDS(98..4309)	22832	KIAA1009	Homo sapiens KIAA1009 (KIAA1009), mRNA.	-0.523999492020976	3.57212244082192	0.0245917556813602	TRUE	kshv-miR-K12-3,kshv-miR-K12-4-5p,kshv-miR-K12-9
NM_018689	212942_s_at,1554685_a_at	TR(1..7080)CDS(261..4346)	57214	KIAA1199	Homo sapiens KIAA1199 (KIAA1199), mRNA.	-1.47060356572227	4.09137841579552	6.77878824796604e-06	TRUE	kshv-miR-K12-1,kshv-miR-K12-6-5p,kshv-miR-K12-9*
NM_014431	231887_s_at	TR(1..4601)CDS(282..2852)	27143	KIAA1274	Homo sapiens KIAA1274 (KIAA1274), mRNA.	-0.568229350383393	2.96601037208595	0.0166603390425735	FALSE	kshv-miR-K12-1,kshv-miR-K12-11,kshv-miR-K12-3,kshv-miR-K12-6-5p,kshv-miR-K12-9*,kshv-miR-K12-7
NM_020848	231841_s_at,231842_at	TR(1..7567)CDS(60..4139)	57608	KIAA1462	Homo sapiens KIAA1462 (KIAA1462), mRNA.	-1.02053758520002	6.11255829182904	0.00127022751433297	TRUE	kshv-miR-K12-3,kshv-miR-K12-4-3p,kshv-miR-K12-9,kshv-miR-K12-6-3p,kshv-miR-K12-11,kshv-miR-K12-5,kshv-miR-K12-6-5p,kshv-miR-K12-4-5p
NM_020888	224746_at	TR(1..5422)CDS(45..3329)	57648	KIAA1522	Homo sapiens KIAA1522 (KIAA1522), mRNA.	-1.47016057015175	5.88815169284521	0.0181272739819645	TRUE	kshv-miR-K12-6-5p,kshv-miR-K12-9*
NM_020931	231869_at	TR(1..2878)CDS(171..2534)	57691	KIAA1586	Homo sapiens KIAA1586 (KIAA1586), mRNA.	-0.600538620977621	6.7923984220833	0.00607536182610146	TRUE	kshv-miR-K12-1
NM_001129993	243539_at	TR(1..4592)CDS(304..2460)	84542	KIAA1841	Homo sapiens KIAA1841 (KIAA1841), transcript variant 1, mRNA.	-1.33427342317026	5.14826295991746	0.000839458789608993	TRUE	kshv-miR-K12-1,kshv-miR-K12-11,kshv-miR-K12-3
NM_021174	221070_s_at,225187_at	TR(1..4031)CDS(420..3191)	57805	KIAA1967	Homo sapiens KIAA1967 (KIAA1967), transcript variant 1, mRNA.	-0.523276339407144	4.52079304013876	0.00826093531251165	TRUE	kshv-miR-K12-3
NM_001017969	235021_at,228446_at,238490_at	TR(1..7204)CDS(217..6528)	158358	KIAA2026	Homo sapiens KIAA2026 (KIAA2026), mRNA.	-0.619318219565878	4.6146032230548	3.57493505075165e-05	TRUE	kshv-miR-K12-1
NM_004523	204444_at	TR(1..5101)CDS(309..3479)	3832	KIF11	Homo sapiens kinesin family member 11 (KIF11), mRNA.	-1.03372441569791	9.22057689476392	0.00555475182741574	TRUE	kshv-miR-K12-5,kshv-miR-K12-1,kshv-miR-K12-3
NM_002254	203390_s_at,203389_at	TR(1..5431)CDS(658..3039)	3797	KIF3C	Homo sapiens kinesin family member 3C (KIF3C), mRNA.	-0.604221467894655	3.70154712211926	0.0209045016531961	FALSE	kshv-miR-K12-6-3p,kshv-miR-K12-9*,kshv-miR-K12-9
NM_015995	219878_s_at,225390_s_at	TR(1..6817)CDS(334..1200)	51621	KLF13	Homo sapiens Kruppel-like factor 13 (KLF13), mRNA.	-0.718521570449092	5.70440195684839	0.00800326086828003	TRUE	kshv-miR-K12-5,kshv-miR-K12-2,kshv-miR-K12-1,kshv-miR-K12-9*
NM_001206	203542_s_at,203543_s_at,203541_s_at	TR(1..5208)CDS(1295..2029)	687	KLF9	Homo sapiens Kruppel-like factor 9 (KLF9), mRNA.	-0.676504892345873	3.86736667157661	0.00245429247171630	TRUE	kshv-miR-K12-2,kshv-miR-K12-3,kshv-miR-K12-4-5p
NM_057161	208784_s_at	TR(1..1879)CDS(170..1318)	116138	KLHDC3	Homo sapiens kelch domain containing 3 (KLHDC3), mRNA.	-0.854079856497844	7.02529777580839	0.000758739456472511	TRUE	kshv-miR-K12-9*
NM_173546	225755_at	TR(1..1993)CDS(186..1250)	200942	KLHDC8B	Homo sapiens kelch domain containing 8B (KLHDC8B), mRNA.	-0.620902449204694	2.97344374351363	0.0143451330055125	FALSE	kshv-miR-K12-5,kshv-miR-K12-6-5p
NM_001007075	226001_at	TR(1..3425)CDS(153..2282)	51088	KLHL5	Homo sapiens kelch-like 5 (Drosophila) (KLHL5), transcript variant 2, mRNA.	-0.510247547675156	9.88679300997456	0.00732651295075718	TRUE	kshv-miR-K12-2,kshv-miR-K12-11,kshv-miR-K12-4-3p
NM_130446	1560397_s_at,1560396_at,228167_at,1555275_a_at	TR(1..6320)CDS(59..1924)	89857	KLHL6	Homo sapiens kelch-like 6 (Drosophila) (KLHL6), mRNA.	-0.747284290121227	3.31597009616938	0.000174343908072745	TRUE	kshv-miR-K12-8,kshv-miR-K12-4-3p,kshv-miR-K12-9,kshv-miR-K12-6-3p,kshv-miR-K12-1,kshv-miR-K12-5,kshv-miR-K12-4-5p,kshv-miR-K12-9*
NM_002264	202059_s_at,202055_at,202057_at,213741_s_at,202058_s_at,202056_at	TR(1..6887)CDS(187..1803)	3836	KPNA1	Homo sapiens karyopherin alpha 1 (importin alpha 5) (KPNA1), mRNA.	-0.719784640775828	7.26423679095587	2.17347369106923e-05	TRUE	kshv-miR-K12-2,kshv-miR-K12-3,kshv-miR-K12-6-3p,kshv-miR-K12-11,kshv-miR-K12-1,kshv-miR-K12-5,kshv-miR-K12-6-5p,kshv-miR-K12-9*
NM_033360	214352_s_at	TR(1..5436)CDS(182..751)	3845	KRAS	Homo sapiens v-Ki-ras2 Kirsten rat sarcoma viral oncogene homolog (KRAS), transcript variant a, mRNA.	-0.932470026211636	10.0212166009105	0.00353421786156064	TRUE	kshv-miR-K12-1,kshv-miR-K12-11,kshv-miR-K12-6-5p,kshv-miR-K12-9*,kshv-miR-K12-4-5p
NM_194454	204738_s_at,34031_i_at,229785_at,216713_at	TR(1..4523)CDS(546..2756)	889	KRIT1	Homo sapiens KRIT1, ankyrin repeat containing (KRIT1), transcript variant 3, mRNA.	-0.859475048317798	6.92990445213874	0.00516176439613191	TRUE	kshv-miR-K12-8,kshv-miR-K12-2,kshv-miR-K12-1,kshv-miR-K12-3,kshv-miR-K12-4-3p,kshv-miR-K12-9*
NM_173598	230551_at,1553491_at	TR(1..17008)CDS(56..2821)	283455	KSR2	Homo sapiens kinase suppressor of ras 2 (KSR2), mRNA.	-1.33159351651757	3.40551807595883	8.88729982419356e-07	TRUE	kshv-miR-K12-8,kshv-miR-K12-2,kshv-miR-K12-3,kshv-miR-K12-9,kshv-miR-K12-6-3p,kshv-miR-K12-11,kshv-miR-K12-1,kshv-miR-K12-5,kshv-miR-K12-6-5p,kshv-miR-K12-9*,kshv-miR-K12-7,kshv-miR-K12-4-5p
NM_001007102	229393_at	TR(1..4140)CDS(171..2438)	84456	L3MBTL3	Homo sapiens l(3)mbt-like 3 (Drosophila) (L3MBTL3), transcript variant 2, mRNA.	-1.05478466476763	4.10270794440236	0.00133655461451207	TRUE	kshv-miR-K12-6-3p,kshv-miR-K12-4-5p
NM_006762	201721_s_at,201720_s_at	TR(1..2232)CDS(76..864)	7805	LAPTM5	Homo sapiens lysosomal multispanning membrane protein 5 (LAPTM5), mRNA.	-0.654922033916961	10.2505773999686	0.0246181777164855	TRUE	kshv-miR-K12-6-5p,kshv-miR-K12-9*
NM_052879	238960_s_at,1555384_a_at,238959_at	TR(1..6478)CDS(145..2319)	113251	LARP4	Homo sapiens La ribonucleoprotein domain family, member 4 (LARP4), transcript variant 1, mRNA.	-1.62359892567565	5.88584533916306	0.00517158079954571	TRUE	kshv-miR-K12-2,kshv-miR-K12-1,kshv-miR-K12-9*,kshv-miR-K12-4-5p
NM_020117	223888_s_at,222427_s_at,222428_s_at	TR(1..4868)CDS(239..3769)	51520	LARS	Homo sapiens leucyl-tRNA synthetase (LARS), mRNA.	-0.806652632208794	9.53155853570974	0.00320915979985144	TRUE	kshv-miR-K12-6-3p,kshv-miR-K12-1
NM_001001712	238071_at	TR(1..2047)CDS(57..659)	414332	LCN10	Homo sapiens lipocalin 10 (LCN10), mRNA.	-1.07851216710766	4.65194273865373	0.00108861858537609	TRUE	kshv-miR-K12-6-5p
NM_000527	217173_s_at,202067_s_at,202068_s_at	TR(1..5265)CDS(169..2751)	3949	LDLR	Homo sapiens low density lipoprotein receptor (LDLR), mRNA.	-0.733014032066202	7.29744784788209	0.0218244667336239	TRUE	kshv-miR-K12-1,kshv-miR-K12-9*,kshv-miR-K12-7
NM_016571	220393_at	TR(1..1947)CDS(35..1564)	51557	LGSN	Homo sapiens lengsin, lens protein with glutamine synthetase domain (LGSN), mRNA.	-0.494289634910352	2.49054982830448	0.0423029845730164	FALSE	kshv-miR-K12-11,kshv-miR-K12-6-5p
NM_194451	214045_at	TR(1..1631)CDS(74..1042)	11019	LIAS	Homo sapiens lipoic acid synthetase (LIAS), nuclear gene encoding mitochondrial protein, transcript variant 2, mRNA.	-1.47188161600472	5.11853840299377	0.000173394137981934	TRUE	kshv-miR-K12-2,kshv-miR-K12-1
NM_000234	202726_at	TR(1..3083)CDS(121..2880)	3978	LIG1	Homo sapiens ligase I, DNA, ATP-dependent (LIG1), mRNA.	-0.617171297926052	6.94209021859633	0.0329024429708588	TRUE	kshv-miR-K12-4-5p
NM_014240	218850_s_at	TR(1..6284)CDS(50..2080)	8994	LIMD1	Homo sapiens LIM domains containing 1 (LIMD1), mRNA.	-1.56186922105283	3.56921921284270	3.71305025793409e-06	TRUE	kshv-miR-K12-8,kshv-miR-K12-5,kshv-miR-K12-1,kshv-miR-K12-11,kshv-miR-K12-6-5p,kshv-miR-K12-9*,kshv-miR-K12-9
NM_018362	221568_s_at,219399_at	TR(1..4729)CDS(5..598)	55327	LIN7C	Homo sapiens lin-7 homolog C (C. elegans) (LIN7C), mRNA.	-0.524605640529569	8.78221242508405	0.000366066456424775	TRUE	kshv-miR-K12-2,kshv-miR-K12-11,kshv-miR-K12-3,kshv-miR-K12-6-5p,kshv-miR-K12-4-3p,kshv-miR-K12-4-5p,kshv-miR-K12-9
NM_022458	224410_s_at,222506_at,224036_s_at	TR(1..4909)CDS(216..1688)	64327	LMBR1	Homo sapiens limb region 1 homolog (mouse) (LMBR1), mRNA.	-1.70332345313809	5.38413710929812	6.26825838586232e-07	TRUE	kshv-miR-K12-6-3p,kshv-miR-K12-5,kshv-miR-K12-2,kshv-miR-K12-1,kshv-miR-K12-3,kshv-miR-K12-6-5p,kshv-miR-K12-4-5p
NM_032737	216952_s_at	TR(1..4653)CDS(88..1890)	84823	LMNB2	Homo sapiens lamin B2 (LMNB2), mRNA.	-0.80809339402263	8.84176778543282	0.00340692538138779	TRUE	kshv-miR-K12-6-3p,kshv-miR-K12-5,kshv-miR-K12-9*
XM_001723446	216112_at	TR(1..2278)CDS(707..1348)	100128274	LOC100128274	PREDICTED: Homo sapiens hypothetical protein LOC100128274 (LOC100128274), mRNA.	-0.602703780468412	2.7458150711306	0.00408392429171901	TRUE	kshv-miR-K12-6-3p,kshv-miR-K12-11,kshv-miR-K12-9
XM_001721688	228791_at	TR(1..3034)CDS(693..1073)	100129502	LOC100129502	PREDICTED: Homo sapiens hypothetical protein LOC100129502 (LOC100129502), mRNA.	-0.763881011231149	3.5283263381776	0.00632749760842984	TRUE	kshv-miR-K12-6-3p,kshv-miR-K12-1,kshv-miR-K12-9*,kshv-miR-K12-4-5p
XM_001725509	236621_at	TR(1..958)CDS(602..877)	100129905	LOC100129905	PREDICTED: Homo sapiens similar to hCG2027326 (LOC100129905), mRNA.	-0.768639982732434	3.08582640197682	0.000765758153351504	TRUE	kshv-miR-K12-6-3p
XM_001726844	222027_at,226880_at,223661_at	TR(1..5668)CDS(1527..1775)	100130123	LOC100130123	PREDICTED: Homo sapiens similar to PRO2870 (LOC100130123), mRNA.	-1.10765118586448	7.03691835586361	1.55385604850160e-05	TRUE	kshv-miR-K12-6-3p,kshv-miR-K12-6-5p,kshv-miR-K12-9*,kshv-miR-K12-4-5p
XM_001725037	235360_at	TR(1..1660)CDS(1..162)	100131989	LOC100131989	PREDICTED: Homo sapiens hypothetical protein LOC100131989 (LOC100131989), mRNA.	-0.703638992284	3.66668580193355	0.00126995810322239	TRUE	kshv-miR-K12-2,kshv-miR-K12-1,kshv-miR-K12-6-5p
XM_001722051	225062_at	TR(1..2461)CDS(290..673)	100132181	LOC100132181	PREDICTED: Homo sapiens hypothetical protein LOC100132181 (LOC100132181), mRNA.	-1.10182064250039	5.55476003463017	2.32763262599386e-05	TRUE	kshv-miR-K12-6-5p,kshv-miR-K12-4-3p
XM_001722753	226179_at	TR(1..3033)CDS(1185..1526)	100133914	LOC100133914	PREDICTED: Homo sapiens hypothetical protein LOC100133914 (LOC100133914), mRNA.	-1.01065200705461	7.24517800237553	0.00280005850097994	TRUE	kshv-miR-K12-2,kshv-miR-K12-1,kshv-miR-K12-9*
NM_001017980	225556_at,242474_s_at	TR(1..4717)CDS(77..382)	203547	LOC203547	Homo sapiens hypothetical protein LOC203547 (LOC203547), mRNA.	-0.951620748817766	7.07990713183243	1.38502596140078e-05	TRUE	kshv-miR-K12-11,kshv-miR-K12-6-5p,kshv-miR-K12-4-3p,kshv-miR-K12-9*,kshv-miR-K12-7,kshv-miR-K12-4-5p,kshv-miR-K12-9
XM_001719409	239958_at,241249_at,1555892_s_at	TR(1..5414)CDS(3027..3494)	253039	LOC253039	PREDICTED: Homo sapiens hypothetical protein LOC253039 (LOC253039), mRNA.	-0.648670086425282	3.24644042865655	0.0208404882176092	TRUE	kshv-miR-K12-5,kshv-miR-K12-1,kshv-miR-K12-3,kshv-miR-K12-4-5p
NM_001040715	1558041_a_at	TR(1..3416)CDS(776..2191)	653319	LOC653319	Homo sapiens hypothetical protein LOC653319 (LOC653319), mRNA.	-0.654965212173076	2.66634522152640	0.0146034680398908	FALSE	kshv-miR-K12-1,kshv-miR-K12-9*
NM_138353	91952_at,221851_at,221849_s_at	TR(1..2274)CDS(7..1809)	90379	LOC90379	Homo sapiens hypothetical protein BC002926 (LOC90379), mRNA.	-0.498206745001796	5.09254459064174	0.0298469946356220	TRUE	kshv-miR-K12-9*
NM_005768	202793_at	TR(1..2297)CDS(115..1578)	10162	LPCAT3	Homo sapiens lysophosphatidylcholine acyltransferase 3 (LPCAT3), mRNA.	-0.921008731057437	6.00798953088833	0.0113007491240476	TRUE	kshv-miR-K12-9*
NM_014873	227476_at,1555058_a_at	TR(1..7802)CDS(228..1340)	9926	LPGAT1	Homo sapiens lysophosphatidylglycerol acyltransferase 1 (LPGAT1), mRNA.	-0.706313648779552	5.71039834649032	0.0176985570921087	TRUE	kshv-miR-K12-2,kshv-miR-K12-3,kshv-miR-K12-4-3p,kshv-miR-K12-6-3p,kshv-miR-K12-11,kshv-miR-K12-1,kshv-miR-K12-5,kshv-miR-K12-6-5p,kshv-miR-K12-9*,kshv-miR-K12-4-5p
NM_012302	206953_s_at	TR(1..5723)CDS(217..4428)	23266	LPHN2	Homo sapiens latrophilin 2 (LPHN2), mRNA.	-0.863907570305684	9.49414105616968	0.00340238055174794	TRUE	kshv-miR-K12-3,kshv-miR-K12-6-5p
NM_145693	212276_at,212272_at,212274_at	TR(1..5363)CDS(68..2740)	23175	LPIN1	Homo sapiens lipin 1 (LPIN1), mRNA.	-1.01513295260598	6.26102049791827	0.000466515179428206	TRUE	kshv-miR-K12-2,kshv-miR-K12-11,kshv-miR-K12-3
NM_014646	202459_s_at,202460_s_at	TR(1..6245)CDS(240..2930)	9663	LPIN2	Homo sapiens lipin 2 (LPIN2), mRNA.	-0.809463402838007	7.51488469509851	0.000651838770064147	TRUE	kshv-miR-K12-5,kshv-miR-K12-2,kshv-miR-K12-1,kshv-miR-K12-3,kshv-miR-K12-6-5p,kshv-miR-K12-9*,kshv-miR-K12-7
NM_014813	205953_at,242164_s_at	TR(1..4015)CDS(199..3396)	9860	LRIG2	Homo sapiens leucine-rich repeats and immunoglobulin-like domains 2 (LRIG2), mRNA.	-0.83368150971501	3.64543290272747	0.000285154214691655	TRUE	kshv-miR-K12-4-3p
NM_001135703	220253_s_at,220254_at,219631_at	TR(1..4079)CDS(96..2618)	29967	LRP12	Homo sapiens low density lipoprotein-related protein 12 (LRP12), transcript variant 2, mRNA.	-0.83825181789122	5.01612438967929	0.00384270286574247	TRUE	kshv-miR-K12-11,kshv-miR-K12-6-5p,kshv-miR-K12-4-3p,kshv-miR-K12-7,kshv-miR-K12-4-5p
NM_017768	218577_at	TR(1..2847)CDS(53..1861)	55631	LRRC40	Homo sapiens leucine rich repeat containing 40 (LRRC40), mRNA.	-0.54543056547916	9.66681899815296	0.00551497136550844	TRUE	kshv-miR-K12-3
NM_001099678	238506_at,225479_at	TR(1..7683)CDS(97..1212)	116064	LRRC58	Homo sapiens leucine rich repeat containing 58 (LRRC58), mRNA.	-0.68495254849737	7.23316062680115	0.00424761286117687	TRUE	kshv-miR-K12-2,kshv-miR-K12-11,kshv-miR-K12-3,kshv-miR-K12-4-3p,kshv-miR-K12-4-5p
NM_015350	212978_at,212976_at	TR(1..7823)CDS(565..2976)	23507	LRRC8B	Homo sapiens leucine rich repeat containing 8 family, member B (LRRC8B), transcript variant 1, mRNA.	-0.965272224481681	3.56682507447331	0.00142214513984460	TRUE	kshv-miR-K12-5,kshv-miR-K12-2,kshv-miR-K12-1,kshv-miR-K12-11,kshv-miR-K12-6-5p,kshv-miR-K12-4-3p,kshv-miR-K12-9
NM_032270	223533_at,228314_at,1558517_s_at	TR(1..7207)CDS(243..2654)	84230	LRRC8C	Homo sapiens leucine rich repeat containing 8 family, member C (LRRC8C), mRNA.	-1.13902075946965	8.52710758711379	0.000256990652767551	TRUE	kshv-miR-K12-6-3p,kshv-miR-K12-5,kshv-miR-K12-2,kshv-miR-K12-11,kshv-miR-K12-3,kshv-miR-K12-6-5p,kshv-miR-K12-4-3p
NM_002340	202245_at,211018_at,211019_s_at	TR(1..4225)CDS(33..2231)	4047	LSS	Homo sapiens lanosterol synthase (2,3-oxidosqualene-lanosterol cyclase) (LSS), transcript variant 1, mRNA.	-1.20295643709332	4.56562367690227	0.0166991073044195	TRUE	kshv-miR-K12-5,kshv-miR-K12-6-5p,kshv-miR-K12-9
NM_003573	213176_s_at	TR(1..5052)CDS(1..4764)	8425	LTBP4	Homo sapiens latent transforming growth factor beta binding protein 4 (LTBP4), transcript variant 2, mRNA.	-0.971548393357223	3.40777289089685	0.0157464454471647	FALSE	kshv-miR-K12-5
NM_152449	228954_at	TR(1..2929)CDS(274..1167)	145748	LYSMD4	Homo sapiens LysM, putative peptidoglycan-binding, domain containing 4 (LYSMD4), mRNA.	-0.749220527445474	3.36594025215740	0.000263696232549926	TRUE	kshv-miR-K12-6-5p,kshv-miR-K12-9*,kshv-miR-K12-4-5p
NM_000081	203518_at,215415_s_at,210943_s_at	TR(1..13493)CDS(176..11581)	1130	LYST	Homo sapiens lysosomal trafficking regulator (LYST), mRNA.	-0.575006504863134	4.30654695912383	0.00803949515252134	TRUE	kshv-miR-K12-6-3p,kshv-miR-K12-2,kshv-miR-K12-1
NM_012090	208633_s_at,208634_s_at	TR(1..17821)CDS(206..16498)	23499	MACF1	Homo sapiens microtubule-actin crosslinking factor 1 (MACF1), transcript variant 1, mRNA.	-0.66455893648133	9.20295260493881	0.0307055052413006	TRUE	kshv-miR-K12-1,kshv-miR-K12-6-5p
NM_005434	209373_at	TR(1..3071)CDS(775..1236)	7851	MALL	Homo sapiens mal, T-cell differentiation protein-like (MALL), mRNA.	-1.5157792994637	10.5389785884820	0.0142842758002959	TRUE	kshv-miR-K12-2,kshv-miR-K12-1,kshv-miR-K12-11,kshv-miR-K12-6-5p,kshv-miR-K12-9*
NM_002372	205105_at	TR(1..5128)CDS(964..4398)	4124	MAN2A1	Homo sapiens mannosidase, alpha, class 2A, member 1 (MAN2A1), mRNA.	-0.508710380836796	8.58099928791264	0.0339778651664493	TRUE	kshv-miR-K12-6-3p,kshv-miR-K12-2
NM_001039538	225540_at,210015_s_at	TR(1..5844)CDS(452..2131)	4133	MAP2	Homo sapiens microtubule-associated protein 2 (MAP2), transcript variant 5, mRNA.	-1.28430694518823	3.61097149613099	4.64831340067142e-07	TRUE	kshv-miR-K12-2,kshv-miR-K12-3,kshv-miR-K12-9,kshv-miR-K12-6-3p,kshv-miR-K12-11,kshv-miR-K12-1,kshv-miR-K12-6-5p,kshv-miR-K12-4-5p,kshv-miR-K12-9*
NM_017824	226394_at,218582_at	TR(1..3941)CDS(333..1169)	54708	MARCH5	Homo sapiens membrane-associated ring finger (C3HC4) 5 (MARCH5), mRNA.	-0.685922061124863	7.30009649503151	5.87607573506723e-05	TRUE	kshv-miR-K12-2,kshv-miR-K12-3,kshv-miR-K12-6-5p
NM_032844	228468_at	TR(1..3659)CDS(640..3276)	84930	MASTL	Homo sapiens microtubule associated serine/threonine kinase-like (MASTL), mRNA.	-0.99405354651946	8.75662099906516	0.0220203591361158	TRUE	kshv-miR-K12-11,kshv-miR-K12-4-5p
NM_199189	1564907_s_at	TR(1..4031)CDS(428..2971)	9782	MATR3	Homo sapiens matrin 3 (MATR3), transcript variant 1, mRNA.	-0.751618221047444	5.04422871300223	0.0270400018145723	TRUE	kshv-miR-K12-4-3p
NM_001042539	207824_s_at	TR(1..2789)CDS(169..1650)	4150	MAZ	Homo sapiens MYC-associated zinc finger protein (purine-binding transcription factor) (MAZ), transcript variant 2, mRNA.	-1.54233491739452	4.31654007559927	0.00191281754655845	TRUE	kshv-miR-K12-7
NM_003925	209579_s_at,214047_s_at,209580_s_at	TR(1..2470)CDS(177..1919)	8930	MBD4	Homo sapiens methyl-CpG binding domain protein 4 (MBD4), mRNA.	-0.657648326093719	8.34794784831476	0.00179534754197562	TRUE	kshv-miR-K12-1,kshv-miR-K12-3
NM_207296	201151_s_at,1555594_a_at,201153_s_at,201152_s_at	TR(1..5246)CDS(790..1812)	4154	MBNL1	Homo sapiens muscleblind-like (Drosophila) (MBNL1), transcript variant 6, mRNA.	-1.57581093767803	10.0852240218757	4.39520410137534e-05	TRUE	kshv-miR-K12-2,kshv-miR-K12-3,kshv-miR-K12-6-5p,kshv-miR-K12-4-5p
NM_017643	243552_at,226797_at	TR(1..5397)CDS(345..2231)	54799	MBTD1	Homo sapiens mbt domain containing 1 (MBTD1), mRNA.	-1.06762494980024	5.83142589166811	0.0168575115121900	TRUE	kshv-miR-K12-2,kshv-miR-K12-1,kshv-miR-K12-11,kshv-miR-K12-3,kshv-miR-K12-6-5p,kshv-miR-K12-4-3p,kshv-miR-K12-9
NM_182751	223570_at,222962_s_at,220651_s_at	TR(1..4535)CDS(102..2729)	55388	MCM10	Homo sapiens minichromosome maintenance complex component 10 (MCM10), transcript variant 1, mRNA.	-0.96303222875172	7.89457651183302	0.041003545961702	TRUE	kshv-miR-K12-1,kshv-miR-K12-4-5p
NM_004526	202107_s_at	TR(1..3453)CDS(58..2772)	4171	MCM2	Homo sapiens minichromosome maintenance complex component 2 (MCM2), mRNA.	-0.51717726166636	10.0241845334083	0.0487539862195738	TRUE	kshv-miR-K12-6-5p
NM_182746	222036_s_at,212142_at,222037_at,212141_at	TR(1..3417)CDS(96..2687)	4173	MCM4	Homo sapiens minichromosome maintenance complex component 4 (MCM4), transcript variant 2, mRNA.	-1.31751798986181	7.69072115303336	0.0176113884692366	TRUE	kshv-miR-K12-1,kshv-miR-K12-9*
NM_006739	216237_s_at,201755_at	TR(1..2568)CDS(95..2299)	4174	MCM5	Homo sapiens minichromosome maintenance complex component 5 (MCM5), mRNA.	-1.09182502858239	8.06068749468697	0.00673094106889773	TRUE	kshv-miR-K12-9*
NM_020128	220397_at,213761_at	TR(1..2301)CDS(137..805)	56890	MDM1	Homo sapiens Mdm1 nuclear protein homolog (mouse) (MDM1), transcript variant 2, mRNA.	-0.89368650706579	4.6998298984222	0.00098103032443987	TRUE	kshv-miR-K12-5,kshv-miR-K12-4-3p,kshv-miR-K12-9*
NM_002392	211832_s_at,205386_s_at	TR(1..2357)CDS(279..1772)	4193	MDM2	Homo sapiens Mdm2 p53 binding protein homolog (mouse) (MDM2), transcript variant MDM2, mRNA.	-0.793920948521545	5.31355830645497	0.000210604932740428	TRUE	kshv-miR-K12-2,kshv-miR-K12-9*
NM_002393	225742_at,236814_at,205655_at,235162_at	TR(1..10073)CDS(163..1635)	4194	MDM4	Homo sapiens Mdm4 p53 binding protein homolog (mouse) (MDM4), transcript variant 1, mRNA.	-0.70292774547305	4.70996987635376	0.0160131552317799	TRUE	kshv-miR-K12-6-3p,kshv-miR-K12-2,kshv-miR-K12-1,kshv-miR-K12-3,kshv-miR-K12-4-3p,kshv-miR-K12-9*,kshv-miR-K12-4-5p
NM_014166	217843_s_at,222438_at	TR(1..2022)CDS(27..839)	29079	MED4	Homo sapiens mediator complex subunit 4 (MED4), mRNA.	-0.658861388361172	6.91054837698718	0.0391476997339504	TRUE	kshv-miR-K12-2,kshv-miR-K12-1,kshv-miR-K12-3,kshv-miR-K12-4-3p,kshv-miR-K12-9
NM_001130926	212535_at,214684_at,208328_s_at	TR(1..5481)CDS(320..1813)	4205	MEF2A	Homo sapiens myocyte enhancer factor 2A (MEF2A), transcript variant 2, mRNA.	-0.772348579272433	7.75236379345035	5.83109443935237e-05	TRUE	kshv-miR-K12-6-3p,kshv-miR-K12-11,kshv-miR-K12-3,kshv-miR-K12-3*,kshv-miR-K12-4-3p
NM_001080497	212831_at,212830_at	TR(1..6297)CDS(1..1920)	1955	MEGF9	Homo sapiens multiple EGF-like-domains 9 (MEGF9), mRNA.	-1.11354578820084	5.16161653732865	0.00371272374380052	TRUE	kshv-miR-K12-8,kshv-miR-K12-6-3p,kshv-miR-K12-1,kshv-miR-K12-3,kshv-miR-K12-9*,kshv-miR-K12-7
NM_170677	207480_s_at	TR(1..3721)CDS(1038..2243)	4212	MEIS2	Homo sapiens Meis homeobox 2 (MEIS2), transcript variant a, mRNA.	-1.17787821128421	7.6461785636287	8.17695416261132e-07	TRUE	kshv-miR-K12-3,kshv-miR-K12-4-3p
NM_022840	219698_s_at,232194_at	TR(1..3691)CDS(781..2199)	64863	METTL4	Homo sapiens methyltransferase like 4 (METTL4), mRNA.	-1.13262113223219	5.79799019570566	0.0484498512463088	TRUE	kshv-miR-K12-4-3p
NM_014033	207761_s_at	TR(1..3390)CDS(289..1023)	25840	METTL7A	Homo sapiens methyltransferase like 7A (METTL7A), mRNA.	-1.56924568826815	5.358570209468	4.12517253778459e-05	TRUE	kshv-miR-K12-1,kshv-miR-K12-9*
NM_001127660	201155_s_at,216205_s_at	TR(1..4540)CDS(309..2582)	9927	MFN2	Homo sapiens mitofusin 2 (MFN2), transcript variant 2, mRNA.	-1.15632741867190	5.68322202937641	0.000181954856481183	TRUE	kshv-miR-K12-6-5p
NM_020774	224726_at,224722_at,224720_at,224725_at	TR(1..9308)CDS(1..3021)	57534	MIB1	Homo sapiens mindbomb homolog 1 (Drosophila) (MIB1), mRNA.	-0.628595829885649	6.62399592022691	0.0159370367024538	TRUE	kshv-miR-K12-2,kshv-miR-K12-1,kshv-miR-K12-4-5p,kshv-miR-K12-9
NM_152622	1554449_at,228961_at,1553336_a_at,231975_s_at,1554450_s_at	TR(1..5220)CDS(26..1675)	166968	MIER3	Homo sapiens mesoderm induction early response 1, family member 3 (MIER3), mRNA.	-0.527454568280309	4.49664972880427	0.0214061606717329	TRUE	kshv-miR-K12-2,kshv-miR-K12-11,kshv-miR-K12-3,kshv-miR-K12-6-5p,kshv-miR-K12-4-3p,kshv-miR-K12-4-5p
NM_013255	242984_at,225526_at,244171_at,235067_at,204423_at	TR(1..11157)CDS(25..2232)	4289	MKLN1	Homo sapiens muskelin 1, intracellular mediator containing kelch motifs (MKLN1), mRNA.	-0.779407303366916	5.91293112722559	0.00203711143508401	TRUE	kshv-miR-K12-6-3p,kshv-miR-K12-5,kshv-miR-K12-1,kshv-miR-K12-11,kshv-miR-K12-3,kshv-miR-K12-6-5p,kshv-miR-K12-4-3p,kshv-miR-K12-9*,kshv-miR-K12-4-5p
NM_024629	218883_s_at,229304_s_at,229305_at	TR(1..2547)CDS(71..1327)	79682	MLF1IP	Homo sapiens MLF1 interacting protein (MLF1IP), mRNA.	-1.46418889818958	7.09933979691146	0.0204043256546662	TRUE	kshv-miR-K12-2,kshv-miR-K12-4-5p
NM_005933	212079_s_at,212080_at,212076_at,212078_s_at,216624_s_at,1565436_s_at	TR(1..14982)CDS(24..11933)	4297	MLL	Homo sapiens myeloid/lymphoid or mixed-lineage leukemia (trithorax homolog, Drosophila) (MLL), mRNA.	-0.566417775708955	4.89299436700245	0.0281050838930365	TRUE	kshv-miR-K12-2,kshv-miR-K12-1,kshv-miR-K12-9*
NM_004995	160020_at,202827_s_at,202828_s_at	TR(1..3558)CDS(235..1983)	4323	MMP14	Homo sapiens matrix metallopeptidase 14 (membrane-inserted) (MMP14), mRNA.	-1.87077847780539	4.10904735329802	7.2203084965973e-06	TRUE	kshv-miR-K12-3,kshv-miR-K12-9*,kshv-miR-K12-9
NM_024756	222822_s_at,219091_s_at	TR(1..3828)CDS(75..2924)	79812	MMRN2	Homo sapiens multimerin 2 (MMRN2), mRNA.	-0.507974016751725	6.22785735702486	0.0495646891146473	TRUE	kshv-miR-K12-1,kshv-miR-K12-4-3p,kshv-miR-K12-4-5p
NM_002430	205330_at	TR(1..7569)CDS(956..4918)	4330	MN1	Homo sapiens meningioma (disrupted in balanced translocation) 1 (MN1), mRNA.	-0.750823973823339	7.45520070616906	0.00514023217836802	TRUE	kshv-miR-K12-1,kshv-miR-K12-6-5p,kshv-miR-K12-4-3p
NM_032117	223700_at	TR(1..941)CDS(90..707)	84057	MND1	Homo sapiens meiotic nuclear divisions 1 homolog (S. cerevisiae) (MND1), mRNA.	-0.721344247585777	7.91699726366527	0.00218197740507607	TRUE	kshv-miR-K12-1
NM_173468	225997_at	TR(1..6960)CDS(191..841)	92597	MOBKL1A	Homo sapiens MOB1, Mps One Binder kinase activator-like 1A (yeast) (MOBKL1A), mRNA.	-0.785515531270059	8.2308625883665	0.0241259363556816	TRUE	kshv-miR-K12-2,kshv-miR-K12-3,kshv-miR-K12-4-3p,kshv-miR-K12-9*,kshv-miR-K12-4-5p
NM_014484	206141_at	TR(1..2458)CDS(18..1400)	27304	MOCS3	Homo sapiens molybdenum cofactor synthesis 3 (MOCS3), mRNA.	-0.996825201895842	5.17358889257761	0.00163381077589136	TRUE	kshv-miR-K12-6-3p,kshv-miR-K12-5,kshv-miR-K12-2,kshv-miR-K12-9*
NM_005797	203780_at,230518_at,203779_s_at	TR(1..2634)CDS(142..789)	10205	MPZL2	Homo sapiens myelin protein zero-like 2 (MPZL2), transcript variant 1, mRNA.	-1.33552050641125	6.05247638650925	0.000779610755215472	TRUE	kshv-miR-K12-1,kshv-miR-K12-9*,kshv-miR-K12-4-5p
NM_005590	242456_at,205395_s_at	TR(1..5164)CDS(297..2339)	4361	MRE11A	Homo sapiens MRE11 meiotic recombination 11 homolog A (S. cerevisiae) (MRE11A), transcript variant 2, mRNA.	-1.05978000008980	6.75509302895381	0.0232854902370398	TRUE	kshv-miR-K12-2,kshv-miR-K12-1,kshv-miR-K12-11,kshv-miR-K12-3
NM_152301	212199_at	TR(1..2145)CDS(199..582)	114932	MRFAP1L1	Homo sapiens Morf4 family associated protein 1-like 1 (MRFAP1L1), transcript variant 1, mRNA.	-0.71943451120626	9.39136211191464	0.0185353475493096	TRUE	kshv-miR-K12-1,kshv-miR-K12-7
NM_018133	218733_at	TR(1..4696)CDS(734..2467)	55167	MSL2	Homo sapiens male-specific lethal 2 homolog (Drosophila) (MSL2), mRNA.	-1.35800195359914	6.16115226987003	2.15121701709932e-06	TRUE	kshv-miR-K12-2,kshv-miR-K12-3,kshv-miR-K12-4-3p,kshv-miR-K12-4-5p
NM_006800	207551_s_at,214009_at	TR(1..2305)CDS(548..1615)	10943	MSL3	Homo sapiens male-specific lethal 3 homolog (Drosophila) (MSL3), transcript variant 3, mRNA.	-0.579856315559699	4.66620680082264	0.00108052072829031	TRUE	kshv-miR-K12-1,kshv-miR-K12-11
NM_007358	203346_s_at,209705_at,209704_at,203347_s_at,203345_s_at	TR(1..4144)CDS(293..2074)	22823	MTF2	Homo sapiens metal response element binding transcription factor 2 (MTF2), mRNA.	-0.864799568556749	7.25843173852724	0.0114307816099689	TRUE	kshv-miR-K12-1
NM_139242	235689_at	TR(1..2763)CDS(27..1196)	123263	MTFMT	Homo sapiens mitochondrial methionyl-tRNA formyltransferase (MTFMT), nuclear gene encoding mitochondrial protein, mRNA.	-0.863895250667479	6.60048699808854	0.00306028169670369	TRUE	kshv-miR-K12-9*
NM_017762	225810_at	TR(1..4969)CDS(99..2432)	54893	MTMR10	Homo sapiens myotubularin related protein 10 (MTMR10), mRNA.	-0.521441926692336	8.41904779542377	0.0243177483570462	TRUE	kshv-miR-K12-5,kshv-miR-K12-2,kshv-miR-K12-3,kshv-miR-K12-9*
NM_015458	213278_at,204837_at	TR(1..7421)CDS(399..2048)	66036	MTMR9	Homo sapiens myotubularin related protein 9 (MTMR9), mRNA.	-1.45196751746229	6.10837584317582	0.000103775416101421	TRUE	kshv-miR-K12-6-3p,kshv-miR-K12-1,kshv-miR-K12-11,kshv-miR-K12-3,kshv-miR-K12-4-3p
NM_004997	206304_at	TR(1..1806)CDS(60..1493)	4608	MYBPH	Homo sapiens myosin binding protein H (MYBPH), mRNA.	-0.657942617399761	2.39127297861163	0.0193555100458219	FALSE	kshv-miR-K12-2
NM_033118	231792_at	TR(1..2793)CDS(103..1893)	85366	MYLK2	Homo sapiens myosin light chain kinase 2 (MYLK2), mRNA.	-0.887919143767748	3.17098011346549	3.93517420628921e-05	FALSE	kshv-miR-K12-9*
NM_000259	227761_at,241966_at,204527_at	TR(1..12227)CDS(245..5812)	4644	MYO5A	Homo sapiens myosin VA (heavy chain 12, myoxin) (MYO5A), mRNA.	-0.658590573917134	8.60571470083883	0.00293744591615204	TRUE	kshv-miR-K12-6-3p,kshv-miR-K12-5,kshv-miR-K12-1,kshv-miR-K12-11,kshv-miR-K12-4-3p,kshv-miR-K12-7
NM_032569	222652_s_at,221628_s_at	TR(1..3747)CDS(38..1699)	84656	N-PAC	Homo sapiens cytokine-like nuclear factor n-pac (N-PAC), mRNA.	-1.23623620392299	3.94279383864045	0.000557260504437316	TRUE	kshv-miR-K12-5,kshv-miR-K12-1,kshv-miR-K12-3,kshv-miR-K12-9*,kshv-miR-K12-4-5p,kshv-miR-K12-9
NM_005966	209272_at,211139_s_at,208047_s_at	TR(1..4499)CDS(573..2036)	4664	NAB1	Homo sapiens NGFI-A binding protein 1 (EGR1 binding protein 1) (NAB1), mRNA.	-1.07811814797839	5.77962024973808	0.0194727275813014	TRUE	kshv-miR-K12-2,kshv-miR-K12-3,kshv-miR-K12-4-3p,kshv-miR-K12-4-5p
NM_005969	1560339_s_at,201414_s_at	TR(1..2564)CDS(142..1269)	4676	NAP1L4	Homo sapiens nucleosome assembly protein 1-like 4 (NAP1L4), mRNA.	-0.923903731270515	8.22484838727472	0.00338577202520961	TRUE	kshv-miR-K12-6-5p,kshv-miR-K12-4-3p,kshv-miR-K12-9*
NM_057175	219158_s_at,226998_at,222837_s_at	TR(1..5554)CDS(257..2857)	80155	NARG1	Homo sapiens NMDA receptor regulated 1 (NARG1), mRNA.	-1.00549564243069	8.13922085898383	0.00168527214933738	TRUE	kshv-miR-K12-5,kshv-miR-K12-11,kshv-miR-K12-3,kshv-miR-K12-6-5p,kshv-miR-K12-4-5p
NM_018527	219378_at,1555450_a_at	TR(1..1692)CDS(248..1183)	79612	NARG1L	Homo sapiens NMDA receptor regulated 1-like (NARG1L), transcript variant 2, mRNA.	-1.00709313022039	6.45224638390965	0.0157066127320652	TRUE	kshv-miR-K12-3,kshv-miR-K12-4-3p
NM_024771	218734_at	TR(1..3352)CDS(128..841)	79829	NAT11	Homo sapiens N-acetyltransferase 11 (GCN5-related, putative) (NAT11), mRNA.	-1.38261365168480	6.06029284165813	7.8320767868581e-05	TRUE	kshv-miR-K12-1,kshv-miR-K12-6-5p
NM_020443	224772_at,224770_s_at,224773_at,224774_s_at,227584_at,224771_at	TR(1..13009)CDS(348..5972)	89796	NAV1	Homo sapiens neuron navigator 1 (NAV1), mRNA.	-0.613886801792072	5.93698620259286	0.0122522405898185	TRUE	kshv-miR-K12-1,kshv-miR-K12-6-5p,kshv-miR-K12-4-3p,kshv-miR-K12-9*,kshv-miR-K12-7
NM_022346	218662_s_at,218663_at	TR(1..4682)CDS(177..3224)	64151	NCAPG	Homo sapiens non-SMC condensin I complex, subunit G (NCAPG), mRNA.	-0.783801457326976	9.67842943435008	0.00806414509178378	TRUE	kshv-miR-K12-2,kshv-miR-K12-3,kshv-miR-K12-9
NM_017760	219588_s_at	TR(1..3950)CDS(146..3577)	54892	NCAPG2	Homo sapiens non-SMC condensin II complex, subunit G2 (NCAPG2), mRNA.	-1.19769853316966	8.38364522923438	0.00258524132154643	TRUE	kshv-miR-K12-3
NM_002486	209520_s_at,209519_at	TR(1..5381)CDS(460..2832)	4686	NCBP1	Homo sapiens nuclear cap binding protein subunit 1, 80kDa (NCBP1), mRNA.	-0.84427485581389	6.87996058230463	0.0304078485240637	TRUE	kshv-miR-K12-1,kshv-miR-K12-11,kshv-miR-K12-3
NM_006534	207700_s_at,211352_s_at,209061_at	TR(1..7923)CDS(206..4468)	8202	NCOA3	Homo sapiens nuclear receptor coactivator 3 (NCOA3), transcript variant 2, mRNA.	-1.34552827744881	7.79101309414266	0.000336376205097316	TRUE	kshv-miR-K12-1,kshv-miR-K12-3
NM_006311	200857_s_at	TR(1..7940)CDS(241..7563)	9611	NCOR1	Homo sapiens nuclear receptor co-repressor 1 (NCOR1), mRNA.	-0.893530025881636	6.77690131422672	0.0190352795675044	TRUE	kshv-miR-K12-1
NM_005006	203039_s_at,236356_at	TR(1..3417)CDS(128..2311)	4719	NDUFS1	Homo sapiens NADH dehydrogenase (ubiquinone) Fe-S protein 1, 75kDa (NADH-coenzyme Q reductase) (NDUFS1), nuclear gene encoding mitochondrial protein, mRNA.	-0.718176661698048	7.32306002279147	0.0337693337182743	TRUE	kshv-miR-K12-1,kshv-miR-K12-9*
NM_001130971	221214_s_at	TR(1..3577)CDS(233..1750)	26012	NELF	Homo sapiens nasal embryonic LHRH factor (NELF), transcript variant 4, mRNA.	-0.647510156899426	7.26378443583341	0.0128476165697190	TRUE	kshv-miR-K12-6-3p,kshv-miR-K12-6-5p,kshv-miR-K12-9*
NM_001047160	201830_s_at,201829_at	TR(1..3414)CDS(139..1929)	10276	NET1	Homo sapiens neuroepithelial cell transforming 1 (NET1), transcript variant 1, mRNA.	-0.702635104761495	8.47643349209917	0.0096375387367956	TRUE	kshv-miR-K12-1,kshv-miR-K12-4-3p,kshv-miR-K12-7,kshv-miR-K12-4-5p
NM_173214	224984_at,208003_s_at,215092_s_at	TR(1..14185)CDS(1499..5866)	10725	NFAT5	Homo sapiens nuclear factor of activated T-cells 5, tonicity-responsive (NFAT5), transcript variant 4, mRNA.	-1.10960234023117	5.9487938273723	0.000176872305508013	TRUE	kshv-miR-K12-2,kshv-miR-K12-1,kshv-miR-K12-11,kshv-miR-K12-3,kshv-miR-K12-4-3p,kshv-miR-K12-4-5p,kshv-miR-K12-9
NM_020529	201502_s_at	TR(1..1579)CDS(111..1064)	4792	NFKBIA	Homo sapiens nuclear factor of kappa light polypeptide gene enhancer in B-cells inhibitor, alpha (NFKBIA), mRNA.	-1.30954296864898	11.4034826895658	0.000540441570196831	TRUE	kshv-miR-K12-1
NM_021705	204109_s_at,228433_at,215720_s_at,204108_at,204107_at	TR(1..6149)CDS(179..1135)	4800	NFYA	Homo sapiens nuclear transcription factor Y, alpha (NFYA), transcript variant 2, mRNA.	-0.819155123339583	4.75483595107717	0.000773379882314294	TRUE	kshv-miR-K12-1,kshv-miR-K12-11,kshv-miR-K12-3,kshv-miR-K12-4-3p,kshv-miR-K12-9*,kshv-miR-K12-4-5p
NM_002508	202007_at,202008_s_at	TR(1..5903)CDS(103..3846)	4811	NID1	Homo sapiens nidogen 1 (NID1), mRNA.	-0.61267698455336	6.03084243028998	0.0360771404770232	TRUE	kshv-miR-K12-6-3p,kshv-miR-K12-4-3p,kshv-miR-K12-7
NM_015384	242352_at,212469_at,212483_at,213918_s_at,207108_s_at	TR(1..10389)CDS(500..8593)	25836	NIPBL	Homo sapiens Nipped-B homolog (Drosophila) (NIPBL), transcript variant B, mRNA.	-0.859022299363044	7.00583816916158	0.000241192522640340	TRUE	kshv-miR-K12-2,kshv-miR-K12-1,kshv-miR-K12-4-5p
NM_016231	222589_at,222590_s_at,218318_s_at	TR(1..3555)CDS(213..1796)	51701	NLK	Homo sapiens nemo-like kinase (NLK), mRNA.	-1.70848396006944	7.76941280825285	1.52712207710128e-05	TRUE	kshv-miR-K12-3,kshv-miR-K12-4-5p
NM_178844	236295_s_at	TR(1..6401)CDS(412..3609)	197358	NLRC3	Homo sapiens NLR family, CARD domain containing 3 (NLRC3), mRNA.	-0.75418282741742	4.26852586806928	0.0133193632116946	TRUE	kshv-miR-K12-6-3p,kshv-miR-K12-4-3p,kshv-miR-K12-9*
NM_032206	226474_at	TR(1..6822)CDS(226..5826)	84166	NLRC5	Homo sapiens NLR family, CARD domain containing 5 (NLRC5), mRNA.	-0.515147499902311	4.24949311662297	0.00334544900939675	FALSE	kshv-miR-K12-9*
NM_004808	205005_s_at,205006_s_at	TR(1..5004)CDS(85..1581)	9397	NMT2	Homo sapiens N-myristoyltransferase 2 (NMT2), mRNA.	-0.59787807973712	9.91858032750478	0.00396124495372039	TRUE	kshv-miR-K12-1,kshv-miR-K12-11,kshv-miR-K12-9*,kshv-miR-K12-7
NM_024654	1554082_a_at,1554084_a_at	TR(1..2837)CDS(20..2128)	79707	NOL9	Homo sapiens nucleolar protein 9 (NOL9), mRNA.	-1.13072176181422	6.46086704975921	0.00534340156943512	TRUE	kshv-miR-K12-1,kshv-miR-K12-9*
NM_002519	211584_s_at,209798_at	TR(1..5962)CDS(103..4386)	4863	NPAT	Homo sapiens nuclear protein, ataxia-telangiectasia locus (NPAT), mRNA.	-0.739286200482191	7.55981515843224	0.0313839248749796	TRUE	kshv-miR-K12-2
NM_013981	208062_s_at,206879_s_at	TR(1..3002)CDS(226..2760)	9542	NRG2	Homo sapiens neuregulin 2 (NRG2), transcript variant 2, mRNA.	-0.891457820325239	3.89964400844975	0.000106562924377174	TRUE	kshv-miR-K12-4-5p
NM_001126181	204081_at	TR(1..1238)CDS(153..389)	4900	NRGN	Homo sapiens neurogranin (protein kinase C substrate, RC3) (NRGN), transcript variant 2, mRNA.	-1.77969741886922	7.56208193769168	0.00049952723643585	TRUE	kshv-miR-K12-3
NM_201279	223510_at,214632_at,225566_at,210841_s_at,211844_s_at,210842_at,229225_at	TR(1..6605)CDS(792..3521)	8828	NRP2	Homo sapiens neuropilin 2 (NRP2), transcript variant 3, mRNA.	-0.86084655824253	4.32095482918567	9.67232238436447e-06	TRUE	kshv-miR-K12-3*,kshv-miR-K12-6-5p,kshv-miR-K12-9*,kshv-miR-K12-9
NM_030763	221606_s_at,221238_at	TR(1..1865)CDS(69..917)	79366	NSBP1	Homo sapiens nucleosomal binding protein 1 (NSBP1), mRNA.	-0.980818471772249	3.67484966547418	0.00180984571356349	TRUE	kshv-miR-K12-4-5p
NM_152729	223178_s_at	TR(1..3193)CDS(96..1463)	221294	NT5DC1	Homo sapiens 5'-nucleotidase domain containing 1 (NT5DC1), mRNA.	-0.791852626354754	7.00171482222361	0.031568993740152	TRUE	kshv-miR-K12-5,kshv-miR-K12-2,kshv-miR-K12-1,kshv-miR-K12-11,kshv-miR-K12-6-5p
NM_022731	229353_s_at,222424_s_at,224582_s_at,217802_s_at	TR(1..6453)CDS(261..992)	64710	NUCKS1	Homo sapiens nuclear casein kinase and cyclin-dependent kinase substrate 1 (NUCKS1), mRNA.	-0.757701436665825	10.5787526946656	0.00778046369562405	TRUE	kshv-miR-K12-2,kshv-miR-K12-3,kshv-miR-K12-6-5p,kshv-miR-K12-4-3p
NM_005124	202097_at	TR(1..5687)CDS(201..4628)	9972	NUP153	Homo sapiens nucleoporin 153kDa (NUP153), mRNA.	-0.835509852301704	8.66883532429099	0.000491750613221084	TRUE	kshv-miR-K12-2
NM_153485	206550_s_at	TR(1..4355)CDS(119..4294)	9631	NUP155	Homo sapiens nucleoporin 155kDa (NUP155), transcript variant 1, mRNA.	-0.75451315529187	8.31562495377214	0.00119836961252229	TRUE	kshv-miR-K12-1,kshv-miR-K12-9*
NM_130837	212214_at	TR(1..6029)CDS(56..3103)	4976	OPA1	Homo sapiens optic atrophy 1 (autosomal dominant) (OPA1), nuclear gene encoding mitochondrial protein, transcript variant 8, mRNA.	-0.934123592137272	6.71725237064447	0.000807872954450684	TRUE	kshv-miR-K12-6-3p,kshv-miR-K12-5,kshv-miR-K12-1,kshv-miR-K12-4-3p,kshv-miR-K12-7
NM_022776	218304_s_at,222586_s_at	TR(1..4651)CDS(738..2981)	114885	OSBPL11	Homo sapiens oxysterol binding protein-like 11 (OSBPL11), mRNA.	-0.866312019004132	7.9484697773249	0.0136607691214448	TRUE	kshv-miR-K12-11
NM_022353	220631_at,230032_at	TR(1..2339)CDS(535..1779)	64172	OSGEPL1	Homo sapiens O-sialoglycoprotein endopeptidase-like 1 (OSGEPL1), mRNA.	-0.686837556640694	7.31270351441147	0.0462809468303689	TRUE	kshv-miR-K12-6-5p,kshv-miR-K12-9*
NM_003999	205729_at	TR(1..4171)CDS(368..3307)	9180	OSMR	Homo sapiens oncostatin M receptor (OSMR), mRNA.	-0.848396973225554	6.0549108190241	0.000158301956880699	TRUE	kshv-miR-K12-2,kshv-miR-K12-11,kshv-miR-K12-4-3p
NM_016023	222825_at	TR(1..3306)CDS(100..1071)	51633	OTUD6B	Homo sapiens OTU domain containing 6B (OTUD6B), mRNA.	-0.548542712191003	7.95670085341334	0.00204583989672236	TRUE	kshv-miR-K12-6-3p,kshv-miR-K12-3,kshv-miR-K12-4-3p,kshv-miR-K12-9
NM_018002	218197_s_at	TR(1..4568)CDS(262..2802)	55074	OXR1	Homo sapiens oxidation resistance 1 (OXR1), transcript variant 1, mRNA.	-0.831577964557447	6.42170804077777	0.00676594592422012	TRUE	kshv-miR-K12-1,kshv-miR-K12-11,kshv-miR-K12-3,kshv-miR-K12-4-3p
NM_005767	218589_at	TR(1..2193)CDS(800..1834)	10161	P2RY5	Homo sapiens purinergic receptor P2Y, G-protein coupled, 5 (P2RY5), mRNA.	-1.91363984860431	3.52996750202395	0.00142276819810745	TRUE	kshv-miR-K12-11
NM_000430	200816_s_at,211547_s_at,200815_s_at,200813_s_at	TR(1..5614)CDS(569..1801)	5048	PAFAH1B1	Homo sapiens platelet-activating factor acetylhydrolase, isoform Ib, alpha subunit 45kDa (PAFAH1B1), mRNA.	-0.574663734487618	7.92380281807491	0.00821634000474736	TRUE	kshv-miR-K12-6-3p,kshv-miR-K12-5,kshv-miR-K12-2,kshv-miR-K12-1,kshv-miR-K12-6-5p,kshv-miR-K12-4-3p,kshv-miR-K12-4-5p
NM_002577	208878_s_at,208877_at	TR(1..6139)CDS(323..1897)	5062	PAK2	Homo sapiens p21 protein (Cdc42/Rac)-activated kinase 2 (PAK2), mRNA.	-0.817794889242648	7.89536098403493	0.000716622989525075	TRUE	kshv-miR-K12-1,kshv-miR-K12-11,kshv-miR-K12-3,kshv-miR-K12-4-3p
NM_024675	219530_at	TR(1..4069)CDS(201..3761)	79728	PALB2	Homo sapiens partner and localizer of BRCA2 (PALB2), mRNA.	-1.00702317064032	7.73445224331603	0.00091290866313439	TRUE	kshv-miR-K12-4-3p
NM_017734	218736_s_at,222725_s_at	TR(1..2601)CDS(444..2099)	54873	PALMD	Homo sapiens palmdelphin (PALMD), mRNA.	-0.83113486544098	6.14128616600778	0.0245123031027456	TRUE	kshv-miR-K12-4-3p,kshv-miR-K12-9*
NM_148977	226649_at	TR(1..3367)CDS(157..1953)	53354	PANK1	Homo sapiens pantothenate kinase 1 (PANK1), transcript variant alpha, mRNA.	-1.01062285921872	5.65503577218723	0.00516805243157833	TRUE	kshv-miR-K12-1,kshv-miR-K12-11,kshv-miR-K12-3,kshv-miR-K12-6-5p
NM_001114394	225761_at,238706_at	TR(1..3523)CDS(694..2148)	167153	PAPD4	Homo sapiens PAP associated domain containing 4 (PAPD4), transcript variant 1, mRNA.	-1.30355402675932	7.77205583073859	0.00643657978201501	TRUE	kshv-miR-K12-2,kshv-miR-K12-1
NM_032632	228569_at,209388_at,222035_s_at	TR(1..4539)CDS(211..2448)	10914	PAPOLA	Homo sapiens poly(A) polymerase alpha (PAPOLA), mRNA.	-0.564072413918674	8.80077156544433	0.0472919007513168	TRUE	kshv-miR-K12-11
NM_022894	219160_s_at,222839_s_at,224427_s_at	TR(1..4252)CDS(232..2442)	64895	PAPOLG	Homo sapiens poly(A) polymerase gamma (PAPOLG), mRNA.	-0.576695829603751	4.73405982372483	0.000843097939192828	TRUE	kshv-miR-K12-2,kshv-miR-K12-3,kshv-miR-K12-4-5p
NM_001134477	203905_at	TR(1..3000)CDS(239..1975)	5073	PARN	Homo sapiens poly(A)-specific ribonuclease (deadenylation nuclease) (PARN), transcript variant 2, mRNA.	-1.10455950730774	7.8769674813671	1.90731637624970e-05	TRUE	kshv-miR-K12-3,kshv-miR-K12-6-5p
NM_017554	224701_at	TR(1..7713)CDS(60..5465)	54625	PARP14	Homo sapiens poly (ADP-ribose) polymerase family, member 14 (PARP14), mRNA.	-0.619543200783612	5.07250625965608	0.0149992959602707	TRUE	kshv-miR-K12-9*
NM_007349	212825_at	TR(1..3723)CDS(44..3253)	22976	PAXIP1	Homo sapiens PAX interacting (with transcription-activation domain) protein 1 (PAXIP1), mRNA.	-0.626816927108979	7.79960834276602	0.000204204810708621	TRUE	kshv-miR-K12-6-5p,kshv-miR-K12-7
NM_006315	204564_at,212753_at	TR(1..5666)CDS(377..1105)	10336	PCGF3	Homo sapiens polycomb group ring finger 3 (PCGF3), mRNA.	-0.695959629474897	5.7163647434072	0.00113816849634051	TRUE	kshv-miR-K12-6-5p,kshv-miR-K12-4-3p
NM_006197	202174_s_at,228905_at	TR(1..8788)CDS(423..6497)	5108	PCM1	Homo sapiens pericentriolar material 1 (PCM1), mRNA.	-0.629051226923117	7.67579287910333	0.00017553551645062	TRUE	kshv-miR-K12-1,kshv-miR-K12-6-5p,kshv-miR-K12-9*,kshv-miR-K12-9
NM_182649	201202_at	TR(1..1319)CDS(204..989)	5111	PCNA	Homo sapiens proliferating cell nuclear antigen (PCNA), transcript variant 2, mRNA.	-0.620124458425269	13.1169000359721	0.0157478218404333	TRUE	kshv-miR-K12-1
NM_004716	203118_at	TR(1..3497)CDS(202..2559)	9159	PCSK7	Homo sapiens proprotein convertase subtilisin/kexin type 7 (PCSK7), mRNA.	-0.771094256871979	6.90279580865398	0.00228856929741025	TRUE	kshv-miR-K12-5,kshv-miR-K12-9*
NM_002595	221918_at,206474_at	TR(1..4041)CDS(490..2061)	5128	PCTK2	Homo sapiens PCTAIRE protein kinase 2 (PCTK2), mRNA.	-1.14085401356730	7.59172875596249	0.000206449902876996	TRUE	kshv-miR-K12-1
NM_016297	225274_at,203803_at	TR(1..5377)CDS(67..1584)	51449	PCYOX1	Homo sapiens prenylcysteine oxidase 1 (PCYOX1), mRNA.	-1.05634326218200	7.31047967079603	0.00289336348366554	TRUE	kshv-miR-K12-8,kshv-miR-K12-6-3p,kshv-miR-K12-5,kshv-miR-K12-2,kshv-miR-K12-1,kshv-miR-K12-6-5p,kshv-miR-K12-4-3p,kshv-miR-K12-4-5p
NM_006203	211840_s_at,204491_at,228962_at,210837_s_at,1554717_a_at	TR(1..7783)CDS(124..2145)	5144	PDE4D	Homo sapiens phosphodiesterase 4D, cAMP-specific (phosphodiesterase E3 dunce homolog, Drosophila) (PDE4D), transcript variant 2, mRNA.	-0.946501643699521	3.97332181080285	0.000942982876257913	TRUE	kshv-miR-K12-6-3p,kshv-miR-K12-5,kshv-miR-K12-1,kshv-miR-K12-4-5p,kshv-miR-K12-9
NM_002601	204091_at	TR(1..1140)CDS(151..603)	5147	PDE6D	Homo sapiens phosphodiesterase 6D, cGMP-specific, rod, delta (PDE6D), mRNA.	-0.691072477903069	7.59797159421227	0.000350174783114332	TRUE	kshv-miR-K12-2,kshv-miR-K12-3
NM_033016	204200_s_at	TR(1..2396)CDS(38..718)	5155	PDGFB	Homo sapiens platelet-derived growth factor beta polypeptide (simian sarcoma viral (v-sis) oncogene homolog) (PDGFB), transcript variant 2, mRNA.	-1.21498214647968	3.81795640879447	0.000150337818037892	TRUE	kshv-miR-K12-9*,kshv-miR-K12-7
NM_016205	218718_at,222719_s_at	TR(1..3007)CDS(492..1529)	56034	PDGFC	Homo sapiens platelet derived growth factor C (PDGFC), mRNA.	-0.975400720891649	9.95780276175397	1.13643066859015e-05	TRUE	kshv-miR-K12-5,kshv-miR-K12-3,kshv-miR-K12-9*
NM_020786	232861_at	TR(1..3830)CDS(163..1752)	57546	PDP2	Homo sapiens pyruvate dehydrogenase phosphatase isoenzyme 2 (PDP2), mRNA.	-1.06633082422652	3.71351164130845	0.00205755868026522	TRUE	kshv-miR-K12-5,kshv-miR-K12-1,kshv-miR-K12-3
NM_015200	213983_s_at,212138_at,213984_at,212140_at	TR(1..6726)CDS(197..4090)	23244	PDS5A	Homo sapiens PDS5, regulator of cohesion maintenance, homolog A (S. cerevisiae) (PDS5A), transcript variant 2, mRNA.	-0.564199422747279	7.99891213346729	0.0121112611612788	TRUE	kshv-miR-K12-6-3p,kshv-miR-K12-11,kshv-miR-K12-3
NM_000442	208983_s_at,208981_at,208982_at	TR(1..3754)CDS(214..2430)	5175	PECAM1	Homo sapiens platelet/endothelial cell adhesion molecule (PECAM1), mRNA.	-0.943992762818294	9.81897731071845	0.00229297607648032	TRUE	kshv-miR-K12-1,kshv-miR-K12-6-5p
NM_002618	235093_at,205246_at,1556009_at	TR(1..4524)CDS(84..1295)	5194	PEX13	Homo sapiens peroxisomal biogenesis factor 13 (PEX13), mRNA.	-1.02087323051421	4.94531773827814	0.00147355292717885	TRUE	kshv-miR-K12-2,kshv-miR-K12-1,kshv-miR-K12-11,kshv-miR-K12-9*,kshv-miR-K12-9
NM_024989	213469_at,241801_at,220576_at,244321_at,239725_at	TR(1..11113)CDS(115..2883)	80055	PGAP1	Homo sapiens post-GPI attachment to proteins 1 (PGAP1), mRNA.	-0.721928399464509	4.32130185096926	0.000132692282920550	TRUE	kshv-miR-K12-1,kshv-miR-K12-11,kshv-miR-K12-3,kshv-miR-K12-4-3p,kshv-miR-K12-9*,kshv-miR-K12-4-5p,kshv-miR-K12-9
NM_001017434	238004_at	TR(1..2035)CDS(224..1249)	267002	PGBD2	Homo sapiens piggyBac transposable element derived 2 (PGBD2), transcript variant 2, mRNA.	-0.923676735822112	4.61423038586023	0.000403146035118882	TRUE	kshv-miR-K12-3
NM_002632	209652_s_at	TR(1..1758)CDS(347..859)	5228	PGF	Homo sapiens placental growth factor (PGF), mRNA.	-0.796032288891126	10.6796577439304	0.0060255814603634	TRUE	kshv-miR-K12-6-5p,kshv-miR-K12-4-3p
NM_173582	1569448_at,229256_at,238417_at,229553_at,235149_at	TR(1..8519)CDS(297..2165)	283209	PGM2L1	Homo sapiens phosphoglucomutase 2-like 1 (PGM2L1), mRNA.	-0.715040354222566	5.92781151653965	0.00190663868281650	TRUE	kshv-miR-K12-1,kshv-miR-K12-3,kshv-miR-K12-6-5p,kshv-miR-K12-4-3p,kshv-miR-K12-4-5p
NM_001100166	244774_at,204048_s_at,204049_s_at,204047_s_at,227947_at	TR(1..9300)CDS(131..1795)	9749	PHACTR2	Homo sapiens phosphatase and actin regulator 2 (PHACTR2), transcript variant 4, mRNA.	-1.94419784224119	8.98627849628477	8.81131461766454e-07	TRUE	kshv-miR-K12-2,kshv-miR-K12-3,kshv-miR-K12-9,kshv-miR-K12-11,kshv-miR-K12-1,kshv-miR-K12-6-5p,kshv-miR-K12-4-5p,kshv-miR-K12-9*
NM_032177	234405_s_at	TR(1..1751)CDS(23..1207)	51808	PHAX	Homo sapiens phosphorylated adaptor for RNA export (PHAX), mRNA.	-0.712805392909594	9.25672502190155	0.000142309030856336	TRUE	kshv-miR-K12-1
NM_014660	204525_at,228095_at	TR(1..4259)CDS(436..3102)	9678	PHF14	Homo sapiens PHD finger protein 14 (PHF14), transcript variant 2, mRNA.	-1.19363738567858	7.45576731710388	1.69768986420175e-05	TRUE	kshv-miR-K12-11,kshv-miR-K12-9
NM_001101802	227090_at,1554153_a_at,203278_s_at	TR(1..7332)CDS(625..2667)	51317	PHF21A	Homo sapiens PHD finger protein 21A (PHF21A), transcript variant 1, mRNA.	-0.776751262292214	4.73308389120812	0.000509723678268644	TRUE	kshv-miR-K12-6-3p,kshv-miR-K12-5,kshv-miR-K12-1,kshv-miR-K12-11,kshv-miR-K12-6-5p,kshv-miR-K12-9*,kshv-miR-K12-4-5p
NM_015153	217951_s_at,217954_s_at,215718_s_at	TR(1..6947)CDS(27..6146)	23469	PHF3	Homo sapiens PHD finger protein 3 (PHF3), mRNA.	-0.601501203716622	6.92250622135173	0.0224631082495222	TRUE	kshv-miR-K12-1
NM_000293	202738_s_at,238601_at,202739_s_at	TR(1..5491)CDS(53..3334)	5257	PHKB	Homo sapiens phosphorylase kinase, beta (PHKB), transcript variant 1, mRNA.	-0.600885208339842	6.92950711168605	0.0110682281435114	TRUE	kshv-miR-K12-2,kshv-miR-K12-4-3p
NM_000294	203709_at	TR(1..1571)CDS(94..1314)	5261	PHKG2	Homo sapiens phosphorylase kinase, gamma 2 (testis) (PHKG2), mRNA.	-0.833766656459065	5.38915954543174	0.0197588843381006	FALSE	kshv-miR-K12-9*
NM_145753	238419_at,225688_s_at	TR(1..6015)CDS(412..4044)	90102	PHLDB2	Homo sapiens pleckstrin homology-like domain, family B, member 2 (PHLDB2), transcript variant 4, mRNA.	-0.681918559470573	7.17241604455459	0.0073501249613509	TRUE	kshv-miR-K12-5,kshv-miR-K12-1,kshv-miR-K12-3,kshv-miR-K12-4-3p
NM_025049	228252_at	TR(1..2659)CDS(67..1992)	80119	PIF1	Homo sapiens PIF1 5'-to-3' DNA helicase homolog (S. cerevisiae) (PIF1), mRNA.	-1.50393129216915	4.27048793133306	0.00726518094324186	TRUE	kshv-miR-K12-6-5p
NM_178517	1558292_s_at	TR(1..2255)CDS(56..1570)	284098	PIGW	Homo sapiens phosphatidylinositol glycan anchor biosynthesis, class W (PIGW), mRNA.	-0.79338494165038	9.36553318961035	8.38446749482462e-05	TRUE	kshv-miR-K12-9*
NM_181523	212249_at,212239_at,212240_s_at	TR(1..6453)CDS(43..2217)	5295	PIK3R1	Homo sapiens phosphoinositide-3-kinase, regulatory subunit 1 (alpha) (PIK3R1), transcript variant 1, mRNA.	-0.937446660851717	4.74481752928187	0.021117349022882	TRUE	kshv-miR-K12-5,kshv-miR-K12-2,kshv-miR-K12-11,kshv-miR-K12-4-5p
NM_003629	202743_at,211580_s_at	TR(1..5693)CDS(757..2142)	8503	PIK3R3	Homo sapiens phosphoinositide-3-kinase, regulatory subunit 3 (gamma) (PIK3R3), transcript variant 1, mRNA.	-0.759104399641966	4.37821740840449	2.10468455301070e-05	TRUE	kshv-miR-K12-2,kshv-miR-K12-3,kshv-miR-K12-6-5p,kshv-miR-K12-9*,kshv-miR-K12-7,kshv-miR-K12-4-5p
NM_006256	212629_s_at,212628_at	TR(1..6104)CDS(343..3297)	5586	PKN2	Homo sapiens protein kinase N2 (PKN2), mRNA.	-1.61373441641793	8.56703100501323	0.000879297260421289	TRUE	kshv-miR-K12-1,kshv-miR-K12-11,kshv-miR-K12-4-3p,kshv-miR-K12-9*,kshv-miR-K12-4-5p,kshv-miR-K12-9
NM_003628	201927_s_at	TR(1..4604)CDS(261..3839)	8502	PKP4	Homo sapiens plakophilin 4 (PKP4), transcript variant 1, mRNA.	-1.20098877052259	4.19574189321185	0.0378689778123471	TRUE	kshv-miR-K12-3,kshv-miR-K12-3*
NM_001031689	209532_at,209533_s_at,235394_at	TR(1..4954)CDS(426..2813)	9373	PLAA	Homo sapiens phospholipase A2-activating protein (PLAA), mRNA.	-0.763947384612784	6.89198786472892	0.00721293521566889	TRUE	kshv-miR-K12-6-3p,kshv-miR-K12-5,kshv-miR-K12-1,kshv-miR-K12-6-5p,kshv-miR-K12-4-3p
NM_182734	213222_at,211925_s_at	TR(1..6823)CDS(4..3525)	23236	PLCB1	Homo sapiens phospholipase C, beta 1 (phosphoinositide-specific) (PLCB1), transcript variant 2, mRNA.	-1.44592400273320	7.19022869088856	0.000676986230833372	TRUE	kshv-miR-K12-5,kshv-miR-K12-11,kshv-miR-K12-3,kshv-miR-K12-4-3p,kshv-miR-K12-9*
NM_182811	202789_at	TR(1..5202)CDS(122..3994)	5335	PLCG1	Homo sapiens phospholipase C, gamma 1 (PLCG1), transcript variant 2, mRNA.	-1.38043296095127	7.93606684639424	0.00565042325674246	TRUE	kshv-miR-K12-11,kshv-miR-K12-9*,kshv-miR-K12-7
NM_024613	218640_s_at,222699_s_at	TR(1..2905)CDS(248..997)	79666	PLEKHF2	Homo sapiens pleckstrin homology domain containing, family F (with FYVE domain) member 2 (PLEKHF2), mRNA.	-0.671908105427766	6.80172999231131	0.000107100238287185	TRUE	kshv-miR-K12-6-3p,kshv-miR-K12-2,kshv-miR-K12-3
NM_025201	204436_at	TR(1..3675)CDS(84..1556)	80301	PLEKHO2	Homo sapiens pleckstrin homology domain containing, family O member 2 (PLEKHO2), mRNA.	-0.650853635461624	6.2668918709577	0.00274634646244698	FALSE	kshv-miR-K12-1,kshv-miR-K12-6-5p,kshv-miR-K12-9*,kshv-miR-K12-4-5p
NM_014264	204886_at,204887_s_at,211088_s_at	TR(1..3830)CDS(246..3158)	10733	PLK4	Homo sapiens polo-like kinase 4 (Drosophila) (PLK4), mRNA.	-1.08906757693511	6.08005148019406	0.0236651651357478	TRUE	kshv-miR-K12-4-3p
NM_002669	225194_at	TR(1..1797)CDS(64..1608)	5356	PLRG1	Homo sapiens pleiotropic regulator 1 (PRL1 homolog, Arabidopsis) (PLRG1), mRNA.	-0.681029164851109	9.80427295752643	0.00413439601322378	TRUE	kshv-miR-K12-3,kshv-miR-K12-9*
NM_021127	204285_s_at,204286_s_at	TR(1..1954)CDS(219..383)	5366	PMAIP1	Homo sapiens phorbol-12-myristate-13-acetate-induced protein 1 (PMAIP1), mRNA.	-0.760174708080235	10.8100483604741	0.0117067260282056	TRUE	kshv-miR-K12-5,kshv-miR-K12-3
NM_015100	212153_at	TR(1..6618)CDS(307..4539)	23126	POGZ	Homo sapiens pogo transposable element with ZNF domain (POGZ), transcript variant 1, mRNA.	-1.20613098211036	7.07188784338668	6.71597258790837e-05	TRUE	kshv-miR-K12-1,kshv-miR-K12-3,kshv-miR-K12-9*
NM_017443	208828_at	TR(1..2185)CDS(172..615)	54107	POLE3	Homo sapiens polymerase (DNA directed), epsilon 3 (p17 subunit) (POLE3), mRNA.	-0.68715291311103	9.5069623844744	0.00598716906112704	TRUE	kshv-miR-K12-6-3p,kshv-miR-K12-5,kshv-miR-K12-11
NM_006502	231115_at,222879_s_at,1557701_s_at,233852_at	TR(1..8412)CDS(305..2446)	5429	POLH	Homo sapiens polymerase (DNA directed), eta (POLH), mRNA.	-0.580655287005427	4.83408364826658	0.0099491523411492	TRUE	kshv-miR-K12-3,kshv-miR-K12-4-3p,kshv-miR-K12-9,kshv-miR-K12-6-3p,kshv-miR-K12-1,kshv-miR-K12-5,kshv-miR-K12-6-5p,kshv-miR-K12-4-5p,kshv-miR-K12-7,kshv-miR-K12-9*
NM_199420	219510_at	TR(1..8787)CDS(130..7902)	10721	POLQ	Homo sapiens polymerase (DNA directed), theta (POLQ), mRNA.	-1.32133087443835	6.84664880438426	0.0201004298386169	TRUE	kshv-miR-K12-2,kshv-miR-K12-6-5p
NM_006999	202466_at	TR(1..3861)CDS(130..1758)	11044	POLS	Homo sapiens polymerase (DNA directed) sigma (POLS), mRNA.	-0.502441101462355	8.8396330386415	0.0426319300570821	TRUE	kshv-miR-K12-1,kshv-miR-K12-3,kshv-miR-K12-4-3p
NM_013382	225560_at,220632_s_at	TR(1..4874)CDS(202..2454)	29954	POMT2	Homo sapiens protein-O-mannosyltransferase 2 (POMT2), mRNA.	-0.550329008171257	4.38581757075462	0.00951984023079327	TRUE	kshv-miR-K12-6-3p,kshv-miR-K12-6-5p,kshv-miR-K12-9*
NM_002697	206789_s_at	TR(1..2689)CDS(163..2394)	5451	POU2F1	Homo sapiens POU class 2 homeobox 1 (POU2F1), mRNA.	-0.904046658420228	4.38128729950808	0.0177823687984440	TRUE	kshv-miR-K12-3,kshv-miR-K12-9*
NM_021823	219066_at	TR(1..2268)CDS(114..728)	60490	PPCDC	Homo sapiens phosphopantothenoylcysteine decarboxylase (PPCDC), mRNA.	-1.18812499321501	5.09659787253427	0.0348673219597448	TRUE	kshv-miR-K12-9
NM_003622	203736_s_at	TR(1..6076)CDS(378..3395)	8496	PPFIBP1	Homo sapiens PTPRF interacting protein, binding protein 1 (liprin beta 1) (PPFIBP1), transcript variant 1, mRNA.	-1.34887070261652	8.21351453548041	0.000466329028221578	TRUE	kshv-miR-K12-2,kshv-miR-K12-3,kshv-miR-K12-4-3p,kshv-miR-K12-9*
NM_005038	204186_s_at	TR(1..1851)CDS(113..1225)	5481	PPID	Homo sapiens peptidylprolyl isomerase D (PPID), mRNA.	-0.746294355942147	8.91573679652278	0.0176580085150804	TRUE	kshv-miR-K12-5,kshv-miR-K12-2,kshv-miR-K12-9*
NM_139126	226472_at	TR(1..2481)CDS(31..1509)	85313	PPIL4	Homo sapiens peptidylprolyl isomerase (cyclophilin)-like 4 (PPIL4), mRNA.	-0.740700924918032	8.39921174402753	0.00264850070060433	TRUE	kshv-miR-K12-6-5p
NM_203467	235113_at	TR(1..1049)CDS(325..765)	122769	PPIL5	Homo sapiens peptidylprolyl isomerase (cyclophilin)-like 5 (PPIL5), transcript variant 3, mRNA.	-0.718033568136451	10.4681726003482	0.0139815014560410	TRUE	kshv-miR-K12-3
NM_002705	203407_at	TR(1..6256)CDS(91..5361)	5493	PPL	Homo sapiens periplakin (PPL), mRNA.	-0.541425129543634	3.19664758288509	2.46924513932371e-07	FALSE	kshv-miR-K12-6-3p,kshv-miR-K12-6-5p
NM_014634	1555470_a_at,37384_at,203063_at	TR(1..5169)CDS(115..1479)	9647	PPM1F	Homo sapiens protein phosphatase 1F (PP2C domain containing) (PPM1F), mRNA.	-0.576618246656335	7.47796521036526	4.97448765126841e-07	TRUE	kshv-miR-K12-1,kshv-miR-K12-6-5p,kshv-miR-K12-9*
NM_206876	201408_at,201409_s_at,201407_s_at	TR(1..4786)CDS(161..1144)	5500	PPP1CB	Homo sapiens protein phosphatase 1, catalytic subunit, beta isoform (PPP1CB), transcript variant 3, mRNA.	-0.5897697483930	8.97411936608005	0.00654880489654163	TRUE	kshv-miR-K12-6-3p,kshv-miR-K12-2,kshv-miR-K12-1,kshv-miR-K12-3,kshv-miR-K12-9
NM_001080545	228646_at	TR(1..1014)CDS(288..617)	151242	PPP1R1C	Homo sapiens protein phosphatase 1, regulatory (inhibitor) subunit 1C (PPP1R1C), mRNA.	-0.585201919308648	4.64207290409366	0.0131950992871406	TRUE	kshv-miR-K12-5,kshv-miR-K12-2
NM_000945	204507_s_at,204506_at	TR(1..3111)CDS(393..905)	5534	PPP3R1	Homo sapiens protein phosphatase 3 (formerly 2B), regulatory subunit B, alpha isoform (PPP3R1), mRNA.	-1.05990301306431	5.5719160412461	2.54868519091466e-05	TRUE	kshv-miR-K12-7,kshv-miR-K12-4-5p
NM_139283	235744_at,225204_at	TR(1..3748)CDS(229..1143)	160760	PPTC7	Homo sapiens PTC7 protein phosphatase homolog (S. cerevisiae) (PPTC7), mRNA.	-0.655188246106639	6.90555693307027	0.0377073025550098	TRUE	kshv-miR-K12-1,kshv-miR-K12-11
NM_002731	202741_at,202742_s_at,235780_at	TR(1..4529)CDS(265..1320)	5567	PRKACB	Homo sapiens protein kinase, cAMP-dependent, catalytic, beta (PRKACB), transcript variant 2, mRNA.	-0.649388956400959	7.82721559345523	0.00589092515019403	TRUE	kshv-miR-K12-2,kshv-miR-K12-1,kshv-miR-K12-9
NM_001040633	222582_at,218292_s_at	TR(1..3154)CDS(475..2052)	51422	PRKAG2	Homo sapiens protein kinase, AMP-activated, gamma 2 non-catalytic subunit (PRKAG2), transcript variant c, mRNA.	-0.664380012566854	7.8959319955756	0.00343901625341594	TRUE	kshv-miR-K12-2,kshv-miR-K12-11,kshv-miR-K12-3,kshv-miR-K12-6-5p
NM_004157	204843_s_at	TR(1..2381)CDS(242..1456)	5576	PRKAR2A	Homo sapiens protein kinase, cAMP-dependent, regulatory, type II, alpha (PRKAR2A), mRNA.	-0.541190039785013	2.75867614483268	0.0268941928694354	FALSE	kshv-miR-K12-6-5p
NM_001079880	38269_at,209282_at	TR(1..3338)CDS(479..3115)	25865	PRKD2	Homo sapiens protein kinase D2 (PRKD2), transcript variant 2, mRNA.	-0.795311132995523	6.55180307487807	0.035521140778343	TRUE	kshv-miR-K12-6-5p
NM_005813	218236_s_at,222565_s_at	TR(1..5907)CDS(556..3228)	23683	PRKD3	Homo sapiens protein kinase D3 (PRKD3), mRNA.	-0.928123414940317	7.40740435365388	3.09512126782916e-06	TRUE	kshv-miR-K12-2,kshv-miR-K12-1,kshv-miR-K12-4-5p
NM_001081640	208694_at	TR(1..13416)CDS(58..12351)	5591	PRKDC	Homo sapiens protein kinase, DNA-activated, catalytic polypeptide (PRKDC), transcript variant 2, mRNA.	-0.678509641182281	11.0769662680788	0.00196186099904612	TRUE	kshv-miR-K12-2,kshv-miR-K12-11
NM_005044	204061_at	TR(1..6054)CDS(368..1444)	5613	PRKX	Homo sapiens protein kinase, X-linked (PRKX), mRNA.	-1.03971977819147	5.21119551400295	0.0100305104118849	TRUE	kshv-miR-K12-6-3p,kshv-miR-K12-1,kshv-miR-K12-11,kshv-miR-K12-3,kshv-miR-K12-9*,kshv-miR-K12-4-5p
NM_018061	218040_at	TR(1..3711)CDS(283..1923)	55119	PRPF38B	Homo sapiens PRP38 pre-mRNA processing factor 38 (yeast) domain containing B (PRPF38B), mRNA.	-1.35248014453514	7.8916936539974	0.000162020086013669	TRUE	kshv-miR-K12-6-3p,kshv-miR-K12-4-3p,kshv-miR-K12-4-5p
NM_017922	220553_s_at	TR(1..2894)CDS(171..2180)	55015	PRPF39	Homo sapiens PRP39 pre-mRNA processing factor 39 homolog (S. cerevisiae) (PRPF39), mRNA.	-1.71765793082656	7.44335562089501	0.0207699590458532	TRUE	kshv-miR-K12-11
NM_007173	226279_at,202458_at	TR(1..3806)CDS(217..1368)	11098	PRSS23	Homo sapiens protease, serine, 23 (PRSS23), mRNA.	-0.614725914530576	12.5479479075115	0.0324810475107535	TRUE	kshv-miR-K12-1
NM_020200	222803_at	TR(1..1926)CDS(30..707)	56952	PRTFDC1	Homo sapiens phosphoribosyl transferase domain containing 1 (PRTFDC1), mRNA.	-1.16299407677022	9.97293269647857	3.88202573501227e-05	TRUE	kshv-miR-K12-3,kshv-miR-K12-9*
NM_001128217	209337_at,205961_s_at	TR(1..3393)CDS(328..1920)	11168	PSIP1	Homo sapiens PC4 and SFRS1 interacting protein 1 (PSIP1), transcript variant 3, mRNA.	-0.912855293574483	9.66961099783024	0.0074311883508958	TRUE	kshv-miR-K12-2,kshv-miR-K12-6-5p,kshv-miR-K12-4-3p
NM_002834	209896_s_at	TR(1..6300)CDS(381..2162)	5781	PTPN11	Homo sapiens protein tyrosine phosphatase, non-receptor type 11 (PTPN11), mRNA.	-0.716351912168986	9.26350419527983	0.00462589720191212	TRUE	kshv-miR-K12-6-3p,kshv-miR-K12-5,kshv-miR-K12-2,kshv-miR-K12-11,kshv-miR-K12-9*,kshv-miR-K12-7
NM_080423	204935_at	TR(1..1623)CDS(195..1256)	5771	PTPN2	Homo sapiens protein tyrosine phosphatase, non-receptor type 2 (PTPN2), transcript variant 3, mRNA.	-1.09469101920547	3.71921792052629	0.0102868578437438	TRUE	kshv-miR-K12-11
NM_080841	213795_s_at,213799_s_at	TR(1..3153)CDS(219..2600)	5786	PTPRA	Homo sapiens protein tyrosine phosphatase, receptor type, A (PTPRA), transcript variant 3, mRNA.	-0.81022437969523	6.95326015590921	0.000995774919249156	TRUE	kshv-miR-K12-1
NM_001109754	217177_s_at,230250_at,205846_at	TR(1..11331)CDS(45..6692)	5787	PTPRB	Homo sapiens protein tyrosine phosphatase, receptor type, B (PTPRB), transcript variant 1, mRNA.	-0.846640947952419	6.98294434995082	3.93626031687517e-07	TRUE	kshv-miR-K12-5,kshv-miR-K12-2,kshv-miR-K12-1,kshv-miR-K12-3,kshv-miR-K12-7,kshv-miR-K12-9
NM_130435	221840_at	TR(1..5039)CDS(101..2029)	5791	PTPRE	Homo sapiens protein tyrosine phosphatase, receptor type, E (PTPRE), transcript variant 2, mRNA.	-1.46993957590971	7.50439875949302	0.0047919085818412	TRUE	kshv-miR-K12-6-3p,kshv-miR-K12-1,kshv-miR-K12-6-5p
NM_130846	206084_at,210675_s_at	TR(1..2733)CDS(393..1631)	5801	PTPRR	Homo sapiens protein tyrosine phosphatase, receptor type, R (PTPRR), transcript variant 2, mRNA.	-0.846129264357165	8.67610189022559	0.0169961992265383	TRUE	kshv-miR-K12-6-3p,kshv-miR-K12-6-5p
NM_031292	229751_s_at	TR(1..3970)CDS(81..2186)	83448	PUS7L	Homo sapiens pseudouridylate synthase 7 homolog (S. cerevisiae)-like (PUS7L), transcript variant 3, mRNA.	-0.833609162825184	5.70908420676059	0.0242634522559561	TRUE	kshv-miR-K12-5,kshv-miR-K12-1,kshv-miR-K12-11,kshv-miR-K12-3
NM_002859	201087_at,211823_s_at	TR(1..3691)CDS(132..1805)	5829	PXN	Homo sapiens paxillin (PXN), transcript variant 2, mRNA.	-0.82752274694268	5.80234236551517	0.0023617556285074	TRUE	kshv-miR-K12-1,kshv-miR-K12-4-3p,kshv-miR-K12-7
NM_004663	200863_s_at,200864_s_at	TR(1..2393)CDS(129..779)	8766	RAB11A	Homo sapiens RAB11A, member RAS oncogene family (RAB11A), mRNA.	-0.714194371532452	9.95214661681525	0.00726667595883209	TRUE	kshv-miR-K12-4-3p,kshv-miR-K12-9*
NM_006861	221819_at,225620_at,205461_at	TR(1..2931)CDS(146..751)	11021	RAB35	Homo sapiens RAB35, member RAS oncogene family (RAB35), mRNA.	-0.98674378525986	6.10155174983902	0.000865309348689402	TRUE	kshv-miR-K12-9*,kshv-miR-K12-7
NM_002868	201276_at	TR(1..3336)CDS(156..803)	5869	RAB5B	Homo sapiens RAB5B, member RAS oncogene family (RAB5B), mRNA.	-1.50318892528789	6.32045788952626	1.32346716324084e-07	TRUE	kshv-miR-K12-5,kshv-miR-K12-6-5p
NM_005370	208819_at	TR(1..2194)CDS(223..846)	4218	RAB8A	Homo sapiens RAB8A, member RAS oncogene family (RAB8A), mRNA.	-0.899868424010326	8.88776300631906	0.0258716970336889	TRUE	kshv-miR-K12-1,kshv-miR-K12-6-5p
NM_006265	200607_s_at	TR(1..3773)CDS(289..2184)	5885	RAD21	Homo sapiens RAD21 homolog (S. pombe) (RAD21), mRNA.	-0.690030012010527	9.32664027842653	0.0281802572291361	TRUE	kshv-miR-K12-1,kshv-miR-K12-11,kshv-miR-K12-9
NM_006479	204146_at	TR(1..2218)CDS(157..1164)	10635	RAD51AP1	Homo sapiens RAD51 associated protein 1 (RAD51AP1), transcript variant 2, mRNA.	-1.28555653191303	10.1192757801544	0.0098239542712142	TRUE	kshv-miR-K12-1,kshv-miR-K12-3,kshv-miR-K12-4-3p
NM_134424	205647_at,210630_s_at	TR(1..2673)CDS(115..1371)	5893	RAD52	Homo sapiens RAD52 homolog (S. cerevisiae) (RAD52), mRNA.	-1.17512248272947	4.67003927005469	0.00679311327887897	TRUE	kshv-miR-K12-6-5p
NM_002880	201244_s_at	TR(1..3291)CDS(416..2362)	5894	RAF1	Homo sapiens v-raf-1 murine leukemia viral oncogene homolog 1 (RAF1), mRNA.	-0.50617731046496	8.5960819642412	0.00314850524038722	TRUE	kshv-miR-K12-6-5p
NM_006267	201713_s_at,226922_at,201712_s_at	TR(1..11711)CDS(127..9801)	5903	RANBP2	Homo sapiens RAN binding protein 2 (RANBP2), mRNA.	-0.610237621519359	8.19004957874665	0.00306513559302292	TRUE	kshv-miR-K12-6-3p
NM_012416	213019_at	TR(1..4606)CDS(12..3329)	26953	RANBP6	Homo sapiens RAN binding protein 6 (RANBP6), transcript variant 1, mRNA.	-0.619160385156578	9.4526323102847	0.0264182857967404	TRUE	kshv-miR-K12-4-3p,kshv-miR-K12-4-5p
NM_021033	225585_at,221830_at	TR(1..4358)CDS(251..802)	5911	RAP2A	Homo sapiens RAP2A, member of RAS oncogene family (RAP2A), mRNA.	-0.769721525374858	7.6454328720966	0.0405964685018051	TRUE	kshv-miR-K12-6-3p,kshv-miR-K12-2,kshv-miR-K12-11,kshv-miR-K12-3,kshv-miR-K12-4-3p,kshv-miR-K12-9*
NM_002886	213923_at,214488_at,238622_at	TR(1..6237)CDS(455..1006)	5912	RAP2B	Homo sapiens RAP2B, member of RAS oncogene family (RAP2B), mRNA.	-0.495177354946813	6.01950225138396	0.000122225135523928	TRUE	kshv-miR-K12-6-3p,kshv-miR-K12-2,kshv-miR-K12-3,kshv-miR-K12-6-5p,kshv-miR-K12-4-3p,kshv-miR-K12-9*,kshv-miR-K12-7,kshv-miR-K12-4-5p
NM_198679	226389_s_at,204543_at,225738_at	TR(1..6204)CDS(160..3447)	2889	RAPGEF1	Homo sapiens Rap guanine nucleotide exchange factor (GEF) 1 (RAPGEF1), transcript variant 2, mRNA.	-1.01215108236842	6.485782374312	1.46615812183557e-05	TRUE	kshv-miR-K12-6-5p,kshv-miR-K12-9*
NM_012294	204680_s_at,204681_s_at	TR(1..6629)CDS(314..2506)	9771	RAPGEF5	Homo sapiens Rap guanine nucleotide exchange factor (GEF) 5 (RAPGEF5), mRNA.	-1.29599596485718	3.46671552048031	2.76640547742311e-06	TRUE	kshv-miR-K12-5,kshv-miR-K12-11,kshv-miR-K12-3,kshv-miR-K12-6-5p,kshv-miR-K12-9*,kshv-miR-K12-4-5p
NM_001135256	237333_at,244872_at,225396_at	TR(1..7843)CDS(165..1337)	5928	RBBP4	Homo sapiens retinoblastoma binding protein 4 (RBBP4), transcript variant 3, mRNA.	-0.728275546047586	5.27275714477561	0.009524088590667	TRUE	kshv-miR-K12-5,kshv-miR-K12-2,kshv-miR-K12-1,kshv-miR-K12-11,kshv-miR-K12-9*
NM_005057	205169_at	TR(1..3683)CDS(131..1747)	5929	RBBP5	Homo sapiens retinoblastoma binding protein 5 (RBBP5), mRNA.	-0.681471016919266	5.9843443505032	0.0144962093898256	TRUE	kshv-miR-K12-6-3p,kshv-miR-K12-1,kshv-miR-K12-9*
NM_002895	1555003_at,1559307_s_at,1555004_a_at	TR(1..4270)CDS(80..3286)	5933	RBL1	Homo sapiens retinoblastoma-like 1 (p107) (RBL1), transcript variant 1, mRNA.	-0.542555409793749	3.98368344133757	0.0372918466844367	TRUE	kshv-miR-K12-1,kshv-miR-K12-4-3p
NM_203390	51228_at,238122_at	TR(1..5115)CDS(194..3199)	389677	RBM12B	Homo sapiens RNA binding motif protein 12B (RBM12B), mRNA.	-0.906528771227566	6.69269183772334	0.0379081228475905	TRUE	kshv-miR-K12-3,kshv-miR-K12-9
NM_006328	239635_at,1555639_a_at,204178_s_at	TR(1..5415)CDS(140..2149)	10432	RBM14	Homo sapiens RNA binding motif protein 14 (RBM14), mRNA.	-0.705752149174733	4.7439970220158	0.00151493416417639	TRUE	kshv-miR-K12-5,kshv-miR-K12-1,kshv-miR-K12-3,kshv-miR-K12-6-5p,kshv-miR-K12-9*,kshv-miR-K12-9
NM_022768	1555760_a_at,1555762_s_at	TR(1..3450)CDS(84..3017)	64783	RBM15	Homo sapiens RNA binding motif protein 15 (RBM15), mRNA.	-0.708307246778195	7.4365525020368	0.0480734283254349	TRUE	kshv-miR-K12-4-3p
NM_018047	218134_s_at,222527_s_at	TR(1..2297)CDS(78..1340)	55696	RBM22	Homo sapiens RNA binding motif protein 22 (RBM22), mRNA.	-0.674080106246066	8.74515516601554	0.000146809032049926	TRUE	kshv-miR-K12-1,kshv-miR-K12-3,kshv-miR-K12-9*
NM_021239	212027_at,212031_at,212028_at,212030_at,212033_at	TR(1..4189)CDS(162..2693)	58517	RBM25	Homo sapiens RNA binding motif protein 25 (RBM25), mRNA.	-1.07384316452165	8.9281340501409	0.00252854930427709	TRUE	kshv-miR-K12-3,kshv-miR-K12-6-5p,kshv-miR-K12-4-3p
NM_006743	208319_s_at	TR(1..1588)CDS(140..613)	5935	RBM3	Homo sapiens RNA binding motif (RNP1, RRM) protein 3 (RBM3), mRNA.	-0.719828606171329	11.9156234556930	0.021595489518376	TRUE	kshv-miR-K12-1
NM_152945	228578_at	TR(1..1860)CDS(93..1517)	129831	RBM45	Homo sapiens RNA binding motif protein 45 (RBM45), mRNA.	-0.544860856852301	7.86383179412649	0.00615947359193572	TRUE	kshv-miR-K12-3
NM_032941	210568_s_at	TR(1..3598)CDS(349..2298)	5965	RECQL	Homo sapiens RecQ protein-like (DNA helicase Q1-like) (RECQL), transcript variant 2, mRNA.	-1.23540352958685	10.0991107272074	0.000177983960452280	TRUE	kshv-miR-K12-6-3p
NM_002908	206036_s_at	TR(1..2592)CDS(225..2084)	5966	REL	Homo sapiens v-rel reticuloendotheliosis viral oncogene homolog (avian) (REL), mRNA.	-1.10878419043773	4.48379523188785	0.0203888371223939	TRUE	kshv-miR-K12-1
NM_002913	208021_s_at	TR(1..4925)CDS(135..3578)	5981	RFC1	Homo sapiens replication factor C (activator 1) 1, 145kDa (RFC1), mRNA.	-0.665457965248811	7.34432083534055	0.000567709052492063	TRUE	kshv-miR-K12-4-3p,kshv-miR-K12-4-5p
NM_181471	203696_s_at,1053_at	TR(1..1715)CDS(26..1090)	5982	RFC2	Homo sapiens replication factor C (activator 1) 2, 40kDa (RFC2), transcript variant 1, mRNA.	-0.684591921762278	8.98718035372326	0.0154974918574431	TRUE	kshv-miR-K12-1,kshv-miR-K12-9*
NM_002915	204128_s_at,204127_at,231119_at	TR(1..2396)CDS(111..1181)	5983	RFC3	Homo sapiens replication factor C (activator 1) 3, 38kDa (RFC3), transcript variant 1, mRNA.	-0.512908332306395	6.2547932515893	0.0461983588344145	TRUE	kshv-miR-K12-9
NM_022457	1552617_a_at,234950_s_at	TR(1..2801)CDS(257..2452)	64326	RFWD2	Homo sapiens ring finger and WD repeat domain 2 (RFWD2), transcript variant 1, mRNA.	-0.50429264465211	7.52359311782508	0.00398371232918015	TRUE	kshv-miR-K12-6-3p,kshv-miR-K12-6-5p,kshv-miR-K12-9
NM_018124	218564_at	TR(1..4952)CDS(99..2423)	55159	RFWD3	Homo sapiens ring finger and WD repeat domain 3 (RFWD3), mRNA.	-0.619156646746069	6.84484976143577	0.0397378962510194	TRUE	kshv-miR-K12-8,kshv-miR-K12-6-3p,kshv-miR-K12-11,kshv-miR-K12-6-5p,kshv-miR-K12-4-3p,kshv-miR-K12-9*
NM_022841	218430_s_at,222630_at	TR(1..7203)CDS(1..4383)	64864	RFX7	Homo sapiens regulatory factor X, 7 (RFX7), mRNA.	-1.51094272510159	5.86340898815765	0.000243400256187136	TRUE	kshv-miR-K12-6-3p,kshv-miR-K12-2,kshv-miR-K12-1,kshv-miR-K12-11,kshv-miR-K12-6-5p,kshv-miR-K12-4-5p,kshv-miR-K12-9
NM_015149	209568_s_at	TR(1..5113)CDS(462..2873)	23179	RGL1	Homo sapiens ral guanine nucleotide dissociation stimulator-like 1 (RGL1), mRNA.	-1.57391595510149	5.30390469702265	3.05882678884288e-09	TRUE	kshv-miR-K12-6-3p,kshv-miR-K12-5,kshv-miR-K12-11,kshv-miR-K12-6-5p
NM_004040	1553963_at,212099_at,1553962_s_at	TR(1..2384)CDS(393..983)	388	RHOB	Homo sapiens ras homolog gene family, member B (RHOB), mRNA.	-0.909861562723326	6.01207387808422	0.00209448213003414	TRUE	kshv-miR-K12-8,kshv-miR-K12-3,kshv-miR-K12-6-5p
NM_001032380	212651_at	TR(1..4381)CDS(233..2323)	9886	RHOBTB1	Homo sapiens Rho-related BTB domain containing 1 (RHOBTB1), transcript variant 3, mRNA.	-1.42045192365866	5.80406577166773	0.00151615079051735	TRUE	kshv-miR-K12-6-3p,kshv-miR-K12-1,kshv-miR-K12-11,kshv-miR-K12-3,kshv-miR-K12-6-5p,kshv-miR-K12-4-5p
NM_020663	235489_at,1555234_a_at,238906_s_at,238905_at,1555233_at,235131_at	TR(1..1905)CDS(444..1088)	57381	RHOJ	Homo sapiens ras homolog gene family, member J (RHOJ), mRNA.	-0.486873960219534	8.59273889795894	0.000602997221539082	TRUE	kshv-miR-K12-6-3p,kshv-miR-K12-6-5p
NM_152756	226312_at,226310_at,228248_at	TR(1..9535)CDS(25..5151)	253260	RICTOR	Homo sapiens rapamycin-insensitive companion of mTOR (RICTOR), mRNA.	-0.848151414831118	9.35984838691665	0.0130454375395517	TRUE	kshv-miR-K12-2,kshv-miR-K12-3,kshv-miR-K12-6-3p,kshv-miR-K12-11,kshv-miR-K12-1,kshv-miR-K12-5,kshv-miR-K12-6-5p,kshv-miR-K12-4-5p
NM_018151	240098_at,236620_at,241820_at	TR(1..8383)CDS(131..7549)	55183	RIF1	Homo sapiens RAP1 interacting factor homolog (yeast) (RIF1), mRNA.	-1.51622880252934	4.85896444875233	0.000396103429744733	TRUE	kshv-miR-K12-4-3p
NM_018993	209684_at	TR(1..4259)CDS(37..2724)	54453	RIN2	Homo sapiens Ras and Rab interactor 2 (RIN2), mRNA.	-0.581272564411612	11.0955522487017	0.000238953863338944	TRUE	kshv-miR-K12-1,kshv-miR-K12-4-3p
NM_012421	204243_at	TR(1..6266)CDS(32..5776)	6018	RLF	Homo sapiens rearranged L-myc fusion (RLF), mRNA.	-0.574516501817765	5.86217434109403	0.0363934604223939	TRUE	kshv-miR-K12-3
NM_020914	225929_s_at,225931_s_at,241480_at,233880_at	TR(1..12877)CDS(224..10066)	57674	RNF213	Homo sapiens ring finger protein 213 (RNF213), mRNA.	-0.678252346389117	3.8250116440498	0.00589203225405966	TRUE	kshv-miR-K12-6-3p,kshv-miR-K12-5,kshv-miR-K12-1,kshv-miR-K12-11
NM_024546	219303_at	TR(1..3552)CDS(60..2240)	79596	RNF219	Homo sapiens ring finger protein 219 (RNF219), mRNA.	-1.44747499510901	6.94418562225267	0.0105460524695588	TRUE	kshv-miR-K12-4-5p
NM_022453	218861_at	TR(1..1566)CDS(89..1468)	64320	RNF25	Homo sapiens ring finger protein 25 (RNF25), mRNA.	-0.63635445256099	6.50166021016828	0.00206465237484846	TRUE	kshv-miR-K12-8
NM_014771	206845_s_at	TR(1..4256)CDS(124..3129)	9810	RNF40	Homo sapiens ring finger protein 40 (RNF40), mRNA.	-0.58427534810345	6.57193590635172	0.00173473467718712	TRUE	kshv-miR-K12-5,kshv-miR-K12-2,kshv-miR-K12-4-3p,kshv-miR-K12-7
NM_005156	224618_at,207223_s_at,214698_at,224617_at,214697_s_at	TR(1..7230)CDS(156..1814)	9991	ROD1	Homo sapiens ROD1 regulator of differentiation 1 (S. pombe) (ROD1), mRNA.	-0.558373457096681	6.92407710124798	1.14948473656381e-05	TRUE	kshv-miR-K12-6-3p,kshv-miR-K12-2,kshv-miR-K12-1,kshv-miR-K12-3,kshv-miR-K12-6-5p,kshv-miR-K12-4-3p,kshv-miR-K12-9*,kshv-miR-K12-7,kshv-miR-K12-4-5p
NM_000990	223707_at	TR(1..4906)CDS(367..813)	6157	RPL27A	Homo sapiens ribosomal protein L27a (RPL27A), mRNA.	-1.34677156220260	3.90775810291346	0.0110572236421713	TRUE	kshv-miR-K12-2,kshv-miR-K12-1,kshv-miR-K12-3,kshv-miR-K12-4-3p,kshv-miR-K12-9*,kshv-miR-K12-7
NM_002950	201011_at	TR(1..2372)CDS(77..1900)	6184	RPN1	Homo sapiens ribophorin I (RPN1), mRNA.	-1.38724303573237	9.46872437418143	0.000164404232016015	TRUE	kshv-miR-K12-5,kshv-miR-K12-1,kshv-miR-K12-4-3p
NM_018170	218209_s_at,222558_at,222559_s_at,1555202_a_at	TR(1..4283)CDS(7..945)	55197	RPRD1A	Homo sapiens regulation of nuclear pre-mRNA domain containing 1A (RPRD1A), mRNA.	-0.592884980603433	7.15367079491683	0.0262907875233729	TRUE	kshv-miR-K12-2,kshv-miR-K12-3,kshv-miR-K12-4-3p
NM_001025	227722_at	TR(1..3325)CDS(94..525)	6228	RPS23	Homo sapiens ribosomal protein S23 (RPS23), mRNA.	-1.51002724915159	5.96797145103651	7.06026224759534e-05	TRUE	kshv-miR-K12-1,kshv-miR-K12-3*,kshv-miR-K12-6-5p,kshv-miR-K12-9*
NM_016656	205540_s_at	TR(1..2227)CDS(652..1776)	10325	RRAGB	Homo sapiens Ras-related GTP binding B (RRAGB), transcript variant RAGBl, mRNA.	-0.85875066968122	2.79151815536001	0.000305831863690328	TRUE	kshv-miR-K12-1,kshv-miR-K12-11
NM_015713	223342_at	TR(1..4955)CDS(245..1300)	50484	RRM2B	Homo sapiens ribonucleotide reductase M2 B (TP53 inducible) (RRM2B), mRNA.	-1.15113816754666	9.66336367344417	8.38554961089436e-06	TRUE	kshv-miR-K12-2,kshv-miR-K12-3,kshv-miR-K12-4-3p,kshv-miR-K12-4-5p
NM_016578	222540_s_at,218166_s_at,223818_s_at	TR(1..5138)CDS(121..4446)	51773	RSF1	Homo sapiens remodeling and spacing factor 1 (RSF1), mRNA.	-0.690002501447626	5.86931917974512	0.000281298246674552	TRUE	kshv-miR-K12-6-3p,kshv-miR-K12-1
NM_198261	202301_s_at,202302_s_at	TR(1..2352)CDS(424..1551)	65117	RSRC2	Homo sapiens arginine/serine-rich coiled-coil 2 (RSRC2), transcript variant 2, mRNA.	-0.846911078984853	9.27336066784781	0.00364759375815109	TRUE	kshv-miR-K12-2,kshv-miR-K12-11,kshv-miR-K12-9*
NM_001134405	241703_at,215321_at	TR(1..4050)CDS(412..1782)	154661	RUNDC3B	Homo sapiens RUN domain containing 3B (RUNDC3B), transcript variant 2, mRNA.	-0.71735505710061	6.64553386328225	0.000118076984560514	TRUE	kshv-miR-K12-2,kshv-miR-K12-4-3p,kshv-miR-K12-9*
NM_001128142	205087_at	TR(1..1151)CDS(77..664)	25950	RWDD3	Homo sapiens RWD domain containing 3 (RWDD3), transcript variant 2, mRNA.	-0.657108459167079	7.44121194443561	0.0351714918264842	TRUE	kshv-miR-K12-4-3p
NM_001005861	216976_s_at,202853_s_at	TR(1..2942)CDS(91..1923)	6259	RYK	Homo sapiens RYK receptor-like tyrosine kinase (RYK), transcript variant 1, mRNA.	-1.15952087924949	7.7944749668775	1.26598161069149e-05	TRUE	kshv-miR-K12-6-3p
NM_001400	204642_at	TR(1..3050)CDS(515..1663)	1901	S1PR1	Homo sapiens sphingosine-1-phosphate receptor 1 (S1PR1), mRNA.	-0.792528716007719	8.94235421628632	5.8703411196952e-05	TRUE	kshv-miR-K12-11,kshv-miR-K12-3,kshv-miR-K12-6-5p,kshv-miR-K12-9*
NM_002967	201748_s_at,201747_s_at	TR(1..3018)CDS(54..2801)	6294	SAFB	Homo sapiens scaffold attachment factor B (SAFB), mRNA.	-1.67969640276171	6.81200118189919	6.31629363758018e-05	TRUE	kshv-miR-K12-3
NM_014649	203280_at,32099_at	TR(1..3334)CDS(213..3074)	9667	SAFB2	Homo sapiens scaffold attachment factor B2 (SAFB2), mRNA.	-0.833298907488807	5.99787350773806	9.2101169321973e-05	TRUE	kshv-miR-K12-3
NM_015474	1559883_s_at,204502_at	TR(1..2701)CDS(131..2011)	25939	SAMHD1	Homo sapiens SAM domain and HD domain 1 (SAMHD1), mRNA.	-0.727952762496826	5.1680962627468	0.00315132395514288	TRUE	kshv-miR-K12-11,kshv-miR-K12-9*
NM_014706	200069_at,209128_s_at,209127_s_at	TR(1..4377)CDS(236..3127)	9733	SART3	Homo sapiens squamous cell carcinoma antigen recognized by T cells 3 (SART3), mRNA.	-0.492804671238681	7.78880624725509	0.00124857582260765	TRUE	kshv-miR-K12-9*
NM_021818	218276_s_at,234491_s_at,222573_s_at	TR(1..3031)CDS(339..1490)	60485	SAV1	Homo sapiens salvador homolog 1 (Drosophila) (SAV1), mRNA.	-1.12167376444314	8.86263466850183	5.16159075226723e-06	TRUE	kshv-miR-K12-1,kshv-miR-K12-4-3p,kshv-miR-K12-9*,kshv-miR-K12-4-5p
NM_006745	209146_at	TR(1..2214)CDS(131..1012)	6307	SC4MOL	Homo sapiens sterol-C4-methyl oxidase-like (SC4MOL), transcript variant 1, mRNA.	-1.34166941839269	10.2740562550821	0.00209857911551012	TRUE	kshv-miR-K12-3,kshv-miR-K12-9*
NM_005506	201646_at,224983_at,201647_s_at	TR(1..4748)CDS(340..1776)	950	SCARB2	Homo sapiens scavenger receptor class B, member 2 (SCARB2), mRNA.	-0.902247802700344	7.72003453371781	0.00279011839590834	TRUE	kshv-miR-K12-5,kshv-miR-K12-2,kshv-miR-K12-1,kshv-miR-K12-9*,kshv-miR-K12-9
NM_145350	1555021_a_at	TR(1..3420)CDS(51..1760)	8578	SCARF1	Homo sapiens scavenger receptor class F, member 1 (SCARF1), transcript variant 3, mRNA.	-0.845699135032525	3.72480850433398	0.0063769734975969	TRUE	kshv-miR-K12-2,kshv-miR-K12-9*
NM_001037582	224018_s_at,224901_at	TR(1..3108)CDS(321..1313)	79966	SCD5	Homo sapiens stearoyl-CoA desaturase 5 (SCD5), transcript variant 1, mRNA.	-0.849944680163011	5.59635698982646	0.0118452802781718	TRUE	kshv-miR-K12-6-3p,kshv-miR-K12-4-3p,kshv-miR-K12-9*
NM_144643	236487_at	TR(1..3053)CDS(507..2573)	132320	SCLT1	Homo sapiens sodium channel and clathrin linker 1 (SCLT1), mRNA.	-0.758483110422556	6.23140329079858	0.00139781891747154	TRUE	kshv-miR-K12-1
NM_006746	222747_s_at,218793_s_at	TR(1..2842)CDS(326..1234)	6322	SCML1	Homo sapiens sex comb on midleg-like 1 (Drosophila) (SCML1), transcript variant 2, mRNA.	-1.07827953974303	6.86327662916493	3.15508527336818e-07	TRUE	kshv-miR-K12-4-3p
NM_032547	223341_s_at,224786_at	TR(1..1958)CDS(144..512)	60592	SCOC	Homo sapiens short coiled-coil protein (SCOC), mRNA.	-0.695265818649563	9.63282330562718	0.00307401072838741	TRUE	kshv-miR-K12-2,kshv-miR-K12-1,kshv-miR-K12-6-5p,kshv-miR-K12-4-5p
NM_014933	200945_s_at,210616_s_at	TR(1..4241)CDS(162..3824)	22872	SEC31A	Homo sapiens SEC31 homolog A (S. cerevisiae) (SEC31A), transcript variant 1, mRNA.	-0.488649663731366	10.5068615540351	0.0306002915852698	TRUE	kshv-miR-K12-6-5p,kshv-miR-K12-4-3p
NM_031454	233168_s_at,233167_at	TR(1..2327)CDS(59..2068)	83642	SELO	Homo sapiens selenoprotein O (SELO), mRNA.	-0.81353489802435	6.40320331189446	0.0287611666503344	TRUE	kshv-miR-K12-6-5p
NM_032108	223567_at	TR(1..3805)CDS(39..2705)	10501	SEMA6B	Homo sapiens sema domain, transmembrane domain (TM), and cytoplasmic domain, (semaphorin) 6B (SEMA6B), mRNA.	-1.42366209023923	6.10076451051527	0.00110395724161349	TRUE	kshv-miR-K12-1,kshv-miR-K12-6-5p
NM_014554	226619_at,1552812_a_at	TR(1..4726)CDS(447..2378)	29843	SENP1	Homo sapiens SUMO1/sentrin specific peptidase 1 (SENP1), mRNA.	-1.25616513751092	5.66186841927084	0.00287790856081081	TRUE	kshv-miR-K12-5,kshv-miR-K12-1,kshv-miR-K12-3,kshv-miR-K12-4-5p
NM_015571	202318_s_at,202319_at	TR(1..6645)CDS(620..3958)	26054	SENP6	Homo sapiens SUMO1/sentrin specific peptidase 6 (SENP6), transcript variant 1, mRNA.	-0.933480896944894	7.57942896621722	0.00286894443981748	TRUE	kshv-miR-K12-1,kshv-miR-K12-11,kshv-miR-K12-3,kshv-miR-K12-4-3p,kshv-miR-K12-7
NM_014454	218346_s_at	TR(1..2785)CDS(12..1667)	27244	SESN1	Homo sapiens sestrin 1 (SESN1), mRNA.	-1.14839285111834	8.77778992331251	0.01397611618478	TRUE	kshv-miR-K12-4-3p
NM_005066	201586_s_at,201585_s_at	TR(1..3073)CDS(94..2217)	6421	SFPQ	Homo sapiens splicing factor proline/glutamine-rich (polypyrimidine tract binding protein associated) (SFPQ), mRNA.	-0.672080171348274	10.5475557088769	0.00134912981606168	TRUE	kshv-miR-K12-1
NM_004593	200892_s_at,210180_s_at,200893_at	TR(1..1972)CDS(122..988)	6434	SFRS10	Homo sapiens splicing factor, arginine/serine-rich 10 (transformer 2 homolog, Drosophila) (SFRS10), mRNA.	-1.09941944930559	10.0195798471378	0.000848986030172149	TRUE	kshv-miR-K12-6-5p,kshv-miR-K12-4-3p,kshv-miR-K12-9*
NM_004768	200686_s_at	TR(1..2775)CDS(125..1579)	9295	SFRS11	Homo sapiens splicing factor, arginine/serine-rich 11 (SFRS11), mRNA.	-0.606095545533218	12.1341641604700	0.00716212734542827	TRUE	kshv-miR-K12-2
NM_001077199	244287_at,212721_at	TR(1..4030)CDS(121..1995)	140890	SFRS12	Homo sapiens splicing factor, arginine/serine-rich 12 (SFRS12), transcript variant 1, mRNA.	-0.51108331837519	7.55579393532439	0.0459417164050141	TRUE	kshv-miR-K12-6-3p,kshv-miR-K12-9
NM_001017392	64371_at,212000_at,213505_s_at	TR(1..4715)CDS(75..3323)	10147	SFRS14	Homo sapiens splicing factor, arginine/serine-rich 14 (SFRS14), transcript variant 1, mRNA.	-1.05124077125744	5.95153180787995	0.0248253325940119	TRUE	kshv-miR-K12-2,kshv-miR-K12-1,kshv-miR-K12-3,kshv-miR-K12-4-5p
NM_020706	222311_s_at,226082_s_at	TR(1..3882)CDS(258..3701)	57466	SFRS15	Homo sapiens splicing factor, arginine/serine-rich 15 (SFRS15), mRNA.	-0.837648102546153	5.30619055911324	0.00961379936878199	TRUE	kshv-miR-K12-3
NM_003017	208673_s_at,235324_at,208672_s_at	TR(1..3144)CDS(172..666)	6428	SFRS3	Homo sapiens splicing factor, arginine/serine-rich 3 (SFRS3), mRNA.	-0.630605166053158	9.5960993049943	0.0402030401609724	TRUE	kshv-miR-K12-1,kshv-miR-K12-11,kshv-miR-K12-4-3p,kshv-miR-K12-9*,kshv-miR-K12-4-5p
NM_032291	223672_at	TR(1..4694)CDS(218..2704)	84251	SGIP1	Homo sapiens SH3-domain GRB2-like (endophilin) interacting protein 1 (SGIP1), mRNA.	-1.54506603495249	3.93099248553301	0.00136423190810031	TRUE	kshv-miR-K12-2,kshv-miR-K12-1,kshv-miR-K12-11,kshv-miR-K12-4-5p
NM_024776	220008_at,225913_at	TR(1..11576)CDS(309..5549)	79834	SGK269	Homo sapiens NKF3 kinase family member (SGK269), mRNA.	-0.536505160336441	5.50312458128371	0.000187737410283893	TRUE	kshv-miR-K12-8,kshv-miR-K12-6-3p,kshv-miR-K12-5,kshv-miR-K12-1,kshv-miR-K12-3,kshv-miR-K12-6-5p,kshv-miR-K12-4-5p
NM_170600	226673_at,1552667_a_at	TR(1..3114)CDS(18..2600)	10044	SH2D3C	Homo sapiens SH2 domain containing 3C (SH2D3C), transcript variant 2, mRNA.	-1.50915194025376	5.02487789132116	0.00492346541907939	TRUE	kshv-miR-K12-1
NM_001122681	209370_s_at,209371_s_at,217253_at,211250_s_at	TR(1..9068)CDS(121..1806)	6452	SH3BP2	Homo sapiens SH3-domain binding protein 2 (SH3BP2), transcript variant 2, mRNA.	-0.70922473626968	4.41444864781438	0.00707484140030209	TRUE	kshv-miR-K12-6-3p,kshv-miR-K12-5,kshv-miR-K12-2,kshv-miR-K12-1,kshv-miR-K12-3,kshv-miR-K12-6-5p,kshv-miR-K12-9*
NM_001018009	201810_s_at	TR(1..2723)CDS(574..1470)	9467	SH3BP5	Homo sapiens SH3-domain binding protein 5 (BTK-associated) (SH3BP5), transcript variant 2, mRNA.	-1.28080302424093	8.37251432052239	0.0254733320465101	TRUE	kshv-miR-K12-2,kshv-miR-K12-4-3p,kshv-miR-K12-9*,kshv-miR-K12-4-5p,kshv-miR-K12-9
NM_001128923	225162_at,1558647_at	TR(1..5210)CDS(1079..3382)	152503	SH3D19	Homo sapiens SH3 domain containing 19 (SH3D19), transcript variant 2, mRNA.	-0.583684641874483	6.42837585258334	3.12304992348812e-06	TRUE	kshv-miR-K12-6-3p,kshv-miR-K12-11,kshv-miR-K12-4-3p
NM_001017995	231823_s_at,1562910_at	TR(1..7777)CDS(172..2907)	285590	SH3PXD2B	Homo sapiens SH3 and PX domains 2B (SH3PXD2B), mRNA.	-0.666290361611662	3.84081803276561	7.43886683583006e-07	TRUE	kshv-miR-K12-8,kshv-miR-K12-1,kshv-miR-K12-6-5p,kshv-miR-K12-9*
NM_024745	219493_at	TR(1..3249)CDS(41..2059)	79801	SHCBP1	Homo sapiens SHC SH2-domain binding protein 1 (SHCBP1), mRNA.	-0.767192241331273	9.75550615365122	0.0122541907645138	TRUE	kshv-miR-K12-2,kshv-miR-K12-4-3p,kshv-miR-K12-4-5p
NM_004169	224954_at,209980_s_at	TR(1..2540)CDS(191..1642)	6470	SHMT1	Homo sapiens serine hydroxymethyltransferase 1 (soluble) (SHMT1), transcript variant 1, mRNA.	-0.566784236715147	6.41625930554013	0.0103915009273190	TRUE	kshv-miR-K12-1
NM_001042683	226366_at	TR(1..7347)CDS(400..5463)	257218	SHPRH	Homo sapiens SNF2 histone linker PHD RING helicase (SHPRH), transcript variant 1, mRNA.	-0.678048753844011	6.95430473488576	0.000315320184209381	TRUE	kshv-miR-K12-5,kshv-miR-K12-1,kshv-miR-K12-4-5p,kshv-miR-K12-9
NM_020859	228400_at,225548_at	TR(1..11023)CDS(954..6944)	57619	SHROOM3	Homo sapiens shroom family member 3 (SHROOM3), mRNA.	-1.32948859657642	6.6614176579218	0.00176787644197264	TRUE	kshv-miR-K12-2,kshv-miR-K12-1,kshv-miR-K12-3,kshv-miR-K12-6-5p,kshv-miR-K12-9*,kshv-miR-K12-4-5p,kshv-miR-K12-9
NM_020717	232404_at,244825_at	TR(1..9556)CDS(27..4508)	57477	SHROOM4	Homo sapiens shroom family member 4 (SHROOM4), mRNA.	-0.630655591622445	4.03941998598682	0.00310620886461886	FALSE	kshv-miR-K12-1,kshv-miR-K12-6-5p,kshv-miR-K12-9*,kshv-miR-K12-7,kshv-miR-K12-4-5p,kshv-miR-K12-9
NM_001102396	221705_s_at,228026_at,235294_at,204666_s_at	TR(1..5519)CDS(81..716)	80143	SIKE	Homo sapiens suppressor of IKK epsilon (SIKE), transcript variant 1, mRNA.	-0.794689642404413	4.21861427896204	0.00238772528866921	TRUE	kshv-miR-K12-6-3p,kshv-miR-K12-2,kshv-miR-K12-1,kshv-miR-K12-3,kshv-miR-K12-4-3p,kshv-miR-K12-9*
NM_015360	227447_at,212896_at	TR(1..4222)CDS(267..3395)	23517	SKIV2L2	Homo sapiens superkiller viralicidic activity 2-like 2 (S. cerevisiae) (SKIV2L2), mRNA.	-0.65493026064748	9.14759823008458	0.000465858042909145	TRUE	kshv-miR-K12-5,kshv-miR-K12-2,kshv-miR-K12-11,kshv-miR-K12-3
NM_006930	200719_at	TR(1..2714)CDS(180..662)	6500	SKP1	Homo sapiens S-phase kinase-associated protein 1 (SKP1), transcript variant 1, mRNA.	-1.64666067875854	6.53355098585584	0.0133389688455032	TRUE	kshv-miR-K12-3,kshv-miR-K12-6-5p
NM_001046	204404_at,225835_at	TR(1..6891)CDS(165..3803)	6558	SLC12A2	Homo sapiens solute carrier family 12 (sodium/potassium/chloride transporters), member 2 (SLC12A2), mRNA.	-1.62258350890775	9.74692224459338	4.65174257094813e-06	TRUE	kshv-miR-K12-3,kshv-miR-K12-9*
NM_003051	209900_s_at,202235_at,202236_s_at,1557918_s_at,202234_s_at	TR(1..3927)CDS(364..1866)	6566	SLC16A1	Homo sapiens solute carrier family 16, member 1 (monocarboxylic acid transporter 1) (SLC16A1), mRNA.	-1.23209597163254	7.69734804869154	0.000283138580955654	TRUE	kshv-miR-K12-6-3p,kshv-miR-K12-1,kshv-miR-K12-6-5p,kshv-miR-K12-4-3p
NM_016612	221920_s_at,222528_s_at	TR(1..1865)CDS(154..1170)	51312	SLC25A37	Homo sapiens solute carrier family 25, member 37 (SLC25A37), nuclear gene encoding mitochondrial protein, mRNA.	-1.18372468289199	7.31909736242856	0.0412483239462634	TRUE	kshv-miR-K12-3,kshv-miR-K12-9*,kshv-miR-K12-7,kshv-miR-K12-4-5p
NM_133496	226217_at,239596_at	TR(1..5862)CDS(142..1272)	148867	SLC30A7	Homo sapiens solute carrier family 30 (zinc transporter), member 7 (SLC30A7), mRNA.	-1.13661488466832	6.45810636272171	7.71957872135305e-05	TRUE	kshv-miR-K12-6-3p,kshv-miR-K12-1,kshv-miR-K12-11,kshv-miR-K12-6-5p,kshv-miR-K12-4-3p,kshv-miR-K12-9*,kshv-miR-K12-7,kshv-miR-K12-4-5p
NM_001859	203971_at,235013_at	TR(1..4797)CDS(187..759)	1317	SLC31A1	Homo sapiens solute carrier family 31 (copper transporters), member 1 (SLC31A1), mRNA.	-0.506472557492995	7.20784213680786	0.0195436715261747	TRUE	kshv-miR-K12-1,kshv-miR-K12-3,kshv-miR-K12-6-5p,kshv-miR-K12-4-3p,kshv-miR-K12-9*,kshv-miR-K12-9
NM_012243	206770_s_at	TR(1..2149)CDS(198..1175)	23443	SLC35A3	Homo sapiens solute carrier family 35 (UDP-N-acetylglucosamine (UDP-GlcNAc) transporter), member A3 (SLC35A3), mRNA.	-0.485349954818211	8.24929664582319	0.0175785781669082	TRUE	kshv-miR-K12-1,kshv-miR-K12-6-5p
NM_001001479	1568623_a_at	TR(1..2542)CDS(646..1698)	339665	SLC35E4	Homo sapiens solute carrier family 35, member E4 (SLC35E4), mRNA.	-0.837258826256207	6.13340030855914	0.000963771127348854	TRUE	kshv-miR-K12-6-5p,kshv-miR-K12-9*
NM_020342	225295_at	TR(1..5337)CDS(166..2661)	57181	SLC39A10	Homo sapiens solute carrier family 39 (zinc transporter), member 10 (SLC39A10), transcript variant 2, mRNA.	-0.50124970374111	9.93611928609328	0.0424884100454224	TRUE	kshv-miR-K12-5,kshv-miR-K12-11,kshv-miR-K12-3,kshv-miR-K12-6-5p,kshv-miR-K12-7,kshv-miR-K12-4-5p,kshv-miR-K12-9
NM_018375	217859_s_at	TR(1..3038)CDS(149..1072)	55334	SLC39A9	Homo sapiens solute carrier family 39 (zinc transporter), member 9 (SLC39A9), mRNA.	-1.37147731778702	4.92068484530139	0.00508182324637402	TRUE	kshv-miR-K12-4-5p
NM_080546	224596_at,228485_s_at,224595_at	TR(1..4540)CDS(222..2195)	23446	SLC44A1	Homo sapiens solute carrier family 44, member 1 (SLC44A1), mRNA.	-0.558407908969478	7.33635529393562	0.0216444494838115	TRUE	kshv-miR-K12-5,kshv-miR-K12-9*,kshv-miR-K12-4-5p
NM_003615	207604_s_at,210286_s_at,209884_s_at	TR(1..7757)CDS(72..3716)	9497	SLC4A7	Homo sapiens solute carrier family 4, sodium bicarbonate cotransporter, member 7 (SLC4A7), mRNA.	-0.604938205493311	7.06520314134342	0.00385420042066670	TRUE	kshv-miR-K12-1,kshv-miR-K12-3,kshv-miR-K12-7,kshv-miR-K12-4-5p
NM_006933	1553313_s_at,213164_at,212944_at,213167_s_at	TR(1..11579)CDS(513..2669)	6526	SLC5A3	Homo sapiens solute carrier family 5 (sodium/myo-inositol cotransporter), member 3 (SLC5A3), mRNA.	-0.735804957802056	6.61194654540608	0.00119111047739404	TRUE	kshv-miR-K12-2,kshv-miR-K12-3,kshv-miR-K12-4-3p,kshv-miR-K12-11,kshv-miR-K12-1,kshv-miR-K12-5,kshv-miR-K12-6-5p,kshv-miR-K12-9*,kshv-miR-K12-7
NM_003043	205921_s_at,211030_s_at,228754_at,205920_at	TR(1..6516)CDS(296..2158)	6533	SLC6A6	Homo sapiens solute carrier family 6 (neurotransmitter transporter, taurine), member 6 (SLC6A6), transcript variant 1, mRNA.	-1.00767943459336	4.92572240233859	2.75853014942678e-07	TRUE	kshv-miR-K12-5,kshv-miR-K12-3,kshv-miR-K12-9*,kshv-miR-K12-4-5p,kshv-miR-K12-9
NM_014720	206875_s_at	TR(1..5629)CDS(35..3742)	9748	SLK	Homo sapiens STE20-like kinase (yeast) (SLK), mRNA.	-0.644127618669779	10.6291261292473	0.0170421307602995	TRUE	kshv-miR-K12-5,kshv-miR-K12-3,kshv-miR-K12-4-5p
NM_024755	217828_at	TR(1..4164)CDS(89..3193)	79811	SLTM	Homo sapiens SAFB-like, transcription modulator (SLTM), transcript variant 1, mRNA.	-0.709332509839922	7.8783287544122	0.000522264604117801	TRUE	kshv-miR-K12-1
NM_005902	205398_s_at,205396_at,218284_at	TR(1..6256)CDS(299..1576)	4088	SMAD3	Homo sapiens SMAD family member 3 (SMAD3), mRNA.	-0.873083148502419	5.94887564442841	9.00406259754441e-06	TRUE	kshv-miR-K12-6-3p,kshv-miR-K12-11,kshv-miR-K12-3,kshv-miR-K12-3*,kshv-miR-K12-6-5p,kshv-miR-K12-4-3p,kshv-miR-K12-4-5p
NM_001001420	235451_at,225219_at,205188_s_at,205187_at,225223_at	TR(1..6937)CDS(286..1683)	4090	SMAD5	Homo sapiens SMAD family member 5 (SMAD5), transcript variant 3, mRNA.	-1.51977295236278	8.29314191841057	3.36750421210276e-06	TRUE	kshv-miR-K12-2,kshv-miR-K12-1,kshv-miR-K12-11,kshv-miR-K12-3,kshv-miR-K12-4-3p,kshv-miR-K12-9*,kshv-miR-K12-4-5p
NM_003074	201073_s_at,201074_at,201072_s_at,201075_s_at	TR(1..5780)CDS(119..3436)	6599	SMARCC1	Homo sapiens SWI/SNF related, matrix associated, actin dependent regulator of chromatin, subfamily c, member 1 (SMARCC1), mRNA.	-0.87604769230687	7.04084814687774	3.78984143384711e-06	TRUE	kshv-miR-K12-6-3p,kshv-miR-K12-5,kshv-miR-K12-2,kshv-miR-K12-1,kshv-miR-K12-3,kshv-miR-K12-6-5p,kshv-miR-K12-9*,kshv-miR-K12-4-5p
NM_003076	209518_at,203183_s_at	TR(1..3431)CDS(171..1718)	6602	SMARCD1	Homo sapiens SWI/SNF related, matrix associated, actin dependent regulator of chromatin, subfamily d, member 1 (SMARCD1), transcript variant 1, mRNA.	-0.504799864934054	6.36185283254216	0.0195826464919567	TRUE	kshv-miR-K12-8,kshv-miR-K12-9*
NM_001042550	204240_s_at,213253_at	TR(1..6054)CDS(351..3944)	10592	SMC2	Homo sapiens structural maintenance of chromosomes 2 (SMC2), transcript variant 1, mRNA.	-0.873930846733991	8.80996678671779	0.0245572633787294	TRUE	kshv-miR-K12-2,kshv-miR-K12-1,kshv-miR-K12-6-5p
NM_005445	209258_s_at,209257_s_at	TR(1..4131)CDS(127..3780)	9126	SMC3	Homo sapiens structural maintenance of chromosomes 3 (SMC3), mRNA.	-1.26667509862496	7.31915246751474	0.0175149118751972	TRUE	kshv-miR-K12-1,kshv-miR-K12-9
NM_005496	201663_s_at,201664_at	TR(1..5297)CDS(269..4135)	10051	SMC4	Homo sapiens structural maintenance of chromosomes 4 (SMC4), transcript variant 1, mRNA.	-0.864915022952364	10.1952559105849	0.0401561291550438	TRUE	kshv-miR-K12-1,kshv-miR-K12-9
NM_015110	212927_at,212926_at	TR(1..5965)CDS(118..3423)	23137	SMC5	Homo sapiens structural maintenance of chromosomes 5 (SMC5), mRNA.	-0.907004274356424	6.88004104535014	0.00049159940476169	TRUE	kshv-miR-K12-3,kshv-miR-K12-9*,kshv-miR-K12-4-5p
NM_024624	236535_at,218781_at	TR(1..5150)CDS(173..3448)	79677	SMC6	Homo sapiens structural maintenance of chromosomes 6 (SMC6), mRNA.	-1.00214443499028	7.8452859781044	0.00073627328195459	TRUE	kshv-miR-K12-5,kshv-miR-K12-9*
NM_020429	215458_s_at,212668_at,212666_at	TR(1..5737)CDS(321..2594)	57154	SMURF1	Homo sapiens SMAD specific E3 ubiquitin protein ligase 1 (SMURF1), transcript variant 1, mRNA.	-0.752625950749683	4.22871903683829	0.00396136604007374	TRUE	kshv-miR-K12-6-5p,kshv-miR-K12-7,kshv-miR-K12-4-5p
NM_003087	209877_at	TR(1..855)CDS(168..551)	6623	SNCG	Homo sapiens synuclein, gamma (breast cancer-specific protein 1) (SNCG), mRNA.	-1.04759962104560	6.5485580794519	0.0103157767484821	FALSE	kshv-miR-K12-6-5p
NM_001100594	209481_at	TR(1..5174)CDS(271..2568)	54861	SNRK	Homo sapiens SNF related kinase (SNRK), transcript variant 2, mRNA.	-0.805416016503495	9.38513978067978	0.000350110226607985	TRUE	kshv-miR-K12-2,kshv-miR-K12-1,kshv-miR-K12-3,kshv-miR-K12-9*,kshv-miR-K12-9
NM_152551	1553274_a_at,226263_at	TR(1..4173)CDS(60..1079)	154007	SNRNP48	Homo sapiens small nuclear ribonucleoprotein 48kDa (U11/U12) (SNRNP48), mRNA.	-0.739567532318243	5.25667894494302	0.0011427363649704	TRUE	kshv-miR-K12-2,kshv-miR-K12-6-5p,kshv-miR-K12-9*
NM_004175	202567_at	TR(1..1385)CDS(441..821)	6634	SNRPD3	Homo sapiens small nuclear ribonucleoprotein D3 polypeptide 18kDa (SNRPD3), mRNA.	-0.996004702109949	11.2766221789313	1.61877481666745e-05	TRUE	kshv-miR-K12-6-5p
NM_003794	205329_s_at,212652_s_at	TR(1..2567)CDS(43..1395)	8723	SNX4	Homo sapiens sorting nexin 4 (SNX4), mRNA.	-0.70679815190782	6.43932163930774	0.0155750119960263	TRUE	kshv-miR-K12-4-5p
NM_021069	225728_at,204288_s_at	TR(1..6344)CDS(859..4161)	8470	SORBS2	Homo sapiens sorbin and SH3 domain containing 2 (SORBS2), transcript variant 2, mRNA.	-1.59139746648247	8.69471833476124	8.21928075979228e-06	TRUE	kshv-miR-K12-8,kshv-miR-K12-3,kshv-miR-K12-6-5p,kshv-miR-K12-4-3p,kshv-miR-K12-7,kshv-miR-K12-4-5p
NM_003105	203509_at,212560_at	TR(1..10924)CDS(81..6725)	6653	SORL1	Homo sapiens sortilin-related receptor, L(DLR class) A repeats-containing (SORL1), mRNA.	-0.91825866537924	3.76843232464075	4.11597406648096e-05	TRUE	kshv-miR-K12-8,kshv-miR-K12-5,kshv-miR-K12-1,kshv-miR-K12-11,kshv-miR-K12-6-5p,kshv-miR-K12-4-3p,kshv-miR-K12-9*
NM_005633	212777_at,227426_at,212780_at	TR(1..8331)CDS(42..4043)	6654	SOS1	Homo sapiens son of sevenless homolog 1 (Drosophila) (SOS1), mRNA.	-0.498422881378694	5.86330555746813	0.0223998978683664	TRUE	kshv-miR-K12-6-3p,kshv-miR-K12-5,kshv-miR-K12-2,kshv-miR-K12-11,kshv-miR-K12-3,kshv-miR-K12-6-5p,kshv-miR-K12-4-3p,kshv-miR-K12-4-5p
NM_006939	217644_s_at,212870_at,211665_s_at	TR(1..5313)CDS(99..4097)	6655	SOS2	Homo sapiens son of sevenless homolog 2 (Drosophila) (SOS2), mRNA.	-1.25050148391865	5.23665807927182	1.26906064566304e-07	TRUE	kshv-miR-K12-1,kshv-miR-K12-6-5p
NM_006943	228358_at,204432_at	TR(1..4645)CDS(331..1278)	6666	SOX12	Homo sapiens SRY (sex determining region Y)-box 12 (SOX12), mRNA.	-0.71715798862569	3.59041469150741	0.00332248135269051	TRUE	kshv-miR-K12-8,kshv-miR-K12-6-5p,kshv-miR-K12-9*
NM_014946	209748_at,207724_s_at	TR(1..5221)CDS(222..2072)	6683	SPAST	Homo sapiens spastin (SPAST), transcript variant 1, mRNA.	-0.642158738675527	6.63113702429547	0.00196808117288244	TRUE	kshv-miR-K12-2,kshv-miR-K12-11,kshv-miR-K12-4-3p,kshv-miR-K12-9*
NM_014752	243570_at	TR(1..2731)CDS(40..720)	9789	SPCS2	Homo sapiens signal peptidase complex subunit 2 homolog (S. cerevisiae) (SPCS2), mRNA.	-1.15319926567779	4.30071733237022	0.0196808989737905	TRUE	kshv-miR-K12-1,kshv-miR-K12-6-5p,kshv-miR-K12-9
NM_015001	201996_s_at,1556059_s_at,201997_s_at,1556058_s_at	TR(1..12227)CDS(205..11199)	23013	SPEN	Homo sapiens spen homolog, transcriptional regulator (Drosophila) (SPEN), mRNA.	-0.853412320546449	5.6771678602506	0.000302651651325806	TRUE	kshv-miR-K12-6-5p
NM_015087	236600_at,212526_at	TR(1..4838)CDS(95..2095)	23111	SPG20	Homo sapiens spastic paraplegia 20 (Troyer syndrome) (SPG20), mRNA.	-0.660982829855169	6.73095213991433	0.0111476263544108	TRUE	kshv-miR-K12-2,kshv-miR-K12-3,kshv-miR-K12-6-5p,kshv-miR-K12-4-3p,kshv-miR-K12-9*
NM_001010862	1555883_s_at,1555882_at	TR(1..4479)CDS(343..1119)	169981	SPIN3	Homo sapiens spindlin family, member 3 (SPIN3), mRNA.	-0.928588483717988	3.63310219515567	2.59366325775149e-06	TRUE	kshv-miR-K12-6-3p,kshv-miR-K12-5,kshv-miR-K12-11,kshv-miR-K12-6-5p,kshv-miR-K12-9*,kshv-miR-K12-7,kshv-miR-K12-4-5p
NM_030964	221489_s_at	TR(1..4992)CDS(242..1210)	81848	SPRY4	Homo sapiens sprouty homolog 4 (Drosophila) (SPRY4), transcript variant 1, mRNA.	-1.05551492040373	6.17843876365426	0.0118880860886653	TRUE	kshv-miR-K12-6-3p,kshv-miR-K12-5,kshv-miR-K12-3,kshv-miR-K12-9*,kshv-miR-K12-7
NM_003129	213562_s_at,213577_at,209218_at	TR(1..2989)CDS(927..2651)	6713	SQLE	Homo sapiens squalene epoxidase (SQLE), mRNA.	-1.25674858821960	7.59828411486525	4.90161115077835e-05	TRUE	kshv-miR-K12-2
NM_001080415	212058_at,212060_at,212061_at	TR(1..7464)CDS(100..3189)	23350	SR140	Homo sapiens U2-associated SR140 protein (SR140), mRNA.	-0.637534787344933	7.80561541637423	0.0275182168330971	TRUE	kshv-miR-K12-2,kshv-miR-K12-3,kshv-miR-K12-4-3p,kshv-miR-K12-9,kshv-miR-K12-1,kshv-miR-K12-6-5p,kshv-miR-K12-4-5p,kshv-miR-K12-7
NM_006662	1569138_a_at,1552630_a_at,212275_s_at	TR(1..10491)CDS(386..10078)	10847	SRCAP	Homo sapiens Snf2-related CREBBP activator protein (SRCAP), mRNA.	-0.519008851980036	2.85687158143381	0.000235228357509504	FALSE	kshv-miR-K12-7
NM_004176	202308_at	TR(1..4194)CDS(195..3638)	6720	SREBF1	Homo sapiens sterol regulatory element binding transcription factor 1 (SREBF1), transcript variant 2, mRNA.	-0.738480380016628	3.23245232540007	0.00124815314931522	TRUE	kshv-miR-K12-6-5p
NM_198935	213140_s_at	TR(1..4566)CDS(56..1246)	26039	SS18L1	Homo sapiens synovial sarcoma translocation gene on chromosome 18-like 1 (SS18L1), mRNA.	-1.70417801743857	7.34377324244948	0.0298428704616408	TRUE	kshv-miR-K12-5,kshv-miR-K12-2,kshv-miR-K12-1,kshv-miR-K12-4-3p,kshv-miR-K12-7,kshv-miR-K12-4-5p
NM_033389	1554114_s_at,1555423_at	TR(1..9166)CDS(1..4272)	85464	SSH2	Homo sapiens slingshot homolog 2 (Drosophila) (SSH2), mRNA.	-1.30685975346769	4.32152245340415	7.11496906712831e-05	TRUE	kshv-miR-K12-2,kshv-miR-K12-11,kshv-miR-K12-3,kshv-miR-K12-6-5p,kshv-miR-K12-9*,kshv-miR-K12-7,kshv-miR-K12-9
NM_007107	222412_s_at,217790_s_at	TR(1..3067)CDS(58..615)	6747	SSR3	Homo sapiens signal sequence receptor, gamma (translocon-associated protein gamma) (SSR3), mRNA.	-1.03024633189111	7.86493738209712	0.00112585930659512	TRUE	kshv-miR-K12-6-3p,kshv-miR-K12-1,kshv-miR-K12-3,kshv-miR-K12-4-5p,kshv-miR-K12-9
NM_014188	223051_at	TR(1..1319)CDS(326..910)	29101	SSU72	Homo sapiens SSU72 RNA polymerase II CTD phosphatase homolog (S. cerevisiae) (SSU72), mRNA.	-0.924658910509687	10.5157936499346	0.00109380276021789	TRUE	kshv-miR-K12-11,kshv-miR-K12-6-5p,kshv-miR-K12-9
NM_001042437	203217_s_at	TR(1..2262)CDS(54..1241)	8869	ST3GAL5	Homo sapiens ST3 beta-galactoside alpha-2,3-sialyltransferase 5 (ST3GAL5), transcript variant 2, mRNA.	-0.902560006673773	4.5888861813439	0.0347971666314068	TRUE	kshv-miR-K12-6-5p
NM_014725	206868_at	TR(1..4911)CDS(384..3455)	9754	STARD8	Homo sapiens StAR-related lipid transfer (START) domain containing 8 (STARD8), mRNA.	-0.683996783598997	6.22217012313775	0.00340523701039227	TRUE	kshv-miR-K12-1,kshv-miR-K12-11,kshv-miR-K12-6-5p,kshv-miR-K12-4-3p
NM_003035	205339_at	TR(1..5016)CDS(156..4019)	6491	STIL	Homo sapiens SCL/TAL1 interrupting locus (STIL), transcript variant 2, mRNA.	-0.892968959098696	8.81122616840616	0.0293627509137224	TRUE	kshv-miR-K12-9*
NM_006819	212009_s_at,213330_s_at	TR(1..2219)CDS(148..1779)	10963	STIP1	Homo sapiens stress-induced-phosphoprotein 1 (STIP1), mRNA.	-0.632662901428478	10.1851911838350	0.0431301097089996	TRUE	kshv-miR-K12-3*,kshv-miR-K12-9*
NM_015000	212572_at,212565_at	TR(1..5110)CDS(200..1594)	23012	STK38L	Homo sapiens serine/threonine kinase 38 like (STK38L), mRNA.	-0.648586527240661	7.86193424705758	0.0280745014908792	TRUE	kshv-miR-K12-11,kshv-miR-K12-3,kshv-miR-K12-6-5p,kshv-miR-K12-4-5p
NM_003162	205520_at	TR(1..3479)CDS(10..2352)	6801	STRN	Homo sapiens striatin, calmodulin binding protein (STRN), mRNA.	-1.02778606934807	2.49794176428134	0.00657886635320065	FALSE	kshv-miR-K12-6-5p,kshv-miR-K12-9*,kshv-miR-K12-4-5p
NM_014574	204496_at,215505_s_at	TR(1..3981)CDS(217..2358)	29966	STRN3	Homo sapiens striatin, calmodulin binding protein 3 (STRN3), transcript variant 2, mRNA.	-0.727240579345164	6.16731001079555	0.00254330222060689	TRUE	kshv-miR-K12-5,kshv-miR-K12-1,kshv-miR-K12-11,kshv-miR-K12-3,kshv-miR-K12-4-5p
NM_001134773	221638_s_at,221500_s_at,1558249_s_at,221499_s_at	TR(1..4897)CDS(736..1662)	8675	STX16	Homo sapiens syntaxin 16 (STX16), transcript variant 4, mRNA.	-1.11546832210491	7.66817204723085	0.000549041674222514	TRUE	kshv-miR-K12-6-3p,kshv-miR-K12-1,kshv-miR-K12-3,kshv-miR-K12-7,kshv-miR-K12-4-5p
NM_003164	203330_s_at	TR(1..1794)CDS(155..1222)	6811	STX5	Homo sapiens syntaxin 5 (STX5), mRNA.	-0.645410426124741	5.97374878474808	0.0386785110714105	TRUE	kshv-miR-K12-6-5p,kshv-miR-K12-9*
NM_005819	212799_at,1552618_at,214441_at,212800_at	TR(1..4548)CDS(238..1005)	10228	STX6	Homo sapiens syntaxin 6 (STX6), mRNA.	-0.652244472853726	5.65851924587512	0.000518298759186418	TRUE	kshv-miR-K12-11,kshv-miR-K12-3,kshv-miR-K12-6-5p
NM_007269	203310_at	TR(1..2522)CDS(76..1854)	6814	STXBP3	Homo sapiens syntaxin binding protein 3 (STXBP3), mRNA.	-0.898197015890636	9.21097555069945	0.00203359118791965	TRUE	kshv-miR-K12-1,kshv-miR-K12-6-5p
NM_001127715	226794_at	TR(1..6433)CDS(162..3617)	134957	STXBP5	Homo sapiens syntaxin binding protein 5 (tomosyn) (STXBP5), transcript variant 2, mRNA.	-1.10734724171316	4.36098793895053	0.00325280121517285	TRUE	kshv-miR-K12-2,kshv-miR-K12-11,kshv-miR-K12-6-5p,kshv-miR-K12-4-3p
NM_003850	202930_s_at	TR(1..2182)CDS(58..1449)	8803	SUCLA2	Homo sapiens succinate-CoA ligase, ADP-forming, beta subunit (SUCLA2), nuclear gene encoding mitochondrial protein, mRNA.	-0.52843595351604	9.32704799039066	0.0167530286313831	TRUE	kshv-miR-K12-2
NM_022491	224974_at,233841_s_at	TR(1..4728)CDS(140..1126)	64426	SUDS3	Homo sapiens suppressor of defective silencing 3 homolog (S. cerevisiae) (SUDS3), mRNA.	-0.944271726716346	5.81032495673111	0.000157368833491008	TRUE	kshv-miR-K12-5,kshv-miR-K12-2,kshv-miR-K12-4-3p
NM_016169	224201_s_at,222749_at	TR(1..4898)CDS(147..1601)	51684	SUFU	Homo sapiens suppressor of fused homolog (Drosophila) (SUFU), mRNA.	-0.633892874677216	4.2306724299201	0.000223700641102236	TRUE	kshv-miR-K12-5,kshv-miR-K12-11,kshv-miR-K12-6-5p,kshv-miR-K12-9*,kshv-miR-K12-4-5p
NM_148893	226278_at	TR(1..1405)CDS(89..322)	258010	SVIP	Homo sapiens small VCP/p97-interacting protein (SVIP), mRNA.	-1.55538095328229	11.1560366541094	0.000646076471648491	TRUE	kshv-miR-K12-6-3p,kshv-miR-K12-1,kshv-miR-K12-4-3p
NM_015055	209307_at,209306_s_at	TR(1..4848)CDS(100..1857)	23075	SWAP70	Homo sapiens SWAP-70 protein (SWAP70), mRNA.	-1.02004174635905	10.4415621653657	0.000845668203208552	TRUE	kshv-miR-K12-6-3p,kshv-miR-K12-1,kshv-miR-K12-3,kshv-miR-K12-4-3p,kshv-miR-K12-7
NM_001040274	236337_at	TR(1..3139)CDS(297..2735)	221711	SYCP2L	Homo sapiens synaptonemal complex protein 2-like (SYCP2L), mRNA.	-0.829995116953003	3.62086307407707	3.38471123312878e-05	TRUE	kshv-miR-K12-6-5p,kshv-miR-K12-4-5p
NM_006372	1555427_s_at,209025_s_at	TR(1..2932)CDS(526..2397)	10492	SYNCRIP	Homo sapiens synaptotagmin binding, cytoplasmic RNA interacting protein (SYNCRIP), mRNA.	-0.929118765795918	9.45411225808932	0.00403873875485738	TRUE	kshv-miR-K12-1,kshv-miR-K12-4-3p
NM_145728	212730_at	TR(1..7355)CDS(121..4818)	23336	SYNM	Homo sapiens synemin, intermediate filament protein (SYNM), transcript variant A, mRNA.	-1.22390458555573	6.94218775235366	4.23616181230918e-05	TRUE	kshv-miR-K12-2,kshv-miR-K12-1,kshv-miR-K12-3,kshv-miR-K12-4-3p,kshv-miR-K12-9
NM_001135806	203999_at,203998_s_at	TR(1..4427)CDS(258..1526)	6857	SYT1	Homo sapiens synaptotagmin I (SYT1), transcript variant 3, mRNA.	-1.08148529999216	5.54260310285956	0.00280663517011059	TRUE	kshv-miR-K12-1,kshv-miR-K12-11,kshv-miR-K12-3,kshv-miR-K12-6-5p
NM_001122824	1554690_a_at,217437_s_at,200911_s_at	TR(1..6572)CDS(380..1567)	6867	TACC1	Homo sapiens transforming, acidic coiled-coil containing protein 1 (TACC1), transcript variant 2, mRNA.	-0.588715921993098	8.4267240983145	0.0136377664510088	TRUE	kshv-miR-K12-6-3p,kshv-miR-K12-5,kshv-miR-K12-1,kshv-miR-K12-6-5p,kshv-miR-K12-9*,kshv-miR-K12-4-5p,kshv-miR-K12-9
NM_053053	225455_at	TR(1..2276)CDS(185..1192)	117143	TADA1L	Homo sapiens transcriptional adaptor 1 (HFI1 homolog, yeast)-like (TADA1L), mRNA.	-0.9537389080564	7.3275618008295	0.000539335216914747	TRUE	kshv-miR-K12-5,kshv-miR-K12-3
NM_006951	1553528_a_at,210053_at	TR(1..3283)CDS(24..2426)	6877	TAF5	Homo sapiens TAF5 RNA polymerase II, TATA box binding protein (TBP)-associated factor, 100kDa (TAF5), mRNA.	-0.83239276121412	6.78853562068694	0.00472530507012294	TRUE	kshv-miR-K12-1
NM_004783	204877_s_at,204986_s_at,204878_s_at	TR(1..4625)CDS(784..3933)	9344	TAOK2	Homo sapiens TAO kinase 2 (TAOK2), transcript variant 1, mRNA.	-0.840202744378982	4.04185621840522	1.47125804633599e-05	TRUE	kshv-miR-K12-4-3p,kshv-miR-K12-9*,kshv-miR-K12-7
NM_020705	227632_at	TR(1..4344)CDS(141..1802)	57465	TBC1D24	Homo sapiens TBC1 domain family, member 24 (TBC1D24), mRNA.	-0.58638212050905	5.76384408853438	0.0406544120597576	TRUE	kshv-miR-K12-6-5p
NM_001134415	206451_at	TR(1..3080)CDS(481..2154)	55171	TBCCD1	Homo sapiens TBCC domain containing 1 (TBCCD1), transcript variant 1, mRNA.	-0.558953691511674	6.4665445940224	0.0301301686983913	TRUE	kshv-miR-K12-9*
NM_013254	218520_at	TR(1..2982)CDS(63..2252)	29110	TBK1	Homo sapiens TANK-binding kinase 1 (TBK1), mRNA.	-0.897364303264776	8.72577180966723	0.0172810282007735	TRUE	kshv-miR-K12-5,kshv-miR-K12-11,kshv-miR-K12-6-5p
NM_005647	201869_s_at,213400_s_at,201867_s_at,201868_s_at	TR(1..5886)CDS(647..2380)	6907	TBL1X	Homo sapiens transducin (beta)-like 1X-linked (TBL1X), mRNA.	-1.36127836644452	5.92526588198485	6.35226990260538e-06	TRUE	kshv-miR-K12-6-3p,kshv-miR-K12-1,kshv-miR-K12-3,kshv-miR-K12-6-5p,kshv-miR-K12-9*
NM_024665	222633_at,223013_at,222634_s_at	TR(1..6550)CDS(262..1806)	79718	TBL1XR1	Homo sapiens transducin (beta)-like 1 X-linked receptor 1 (TBL1XR1), mRNA.	-1.01742800166724	8.38691601442863	1.0586647470557e-05	TRUE	kshv-miR-K12-3,kshv-miR-K12-6-5p
NM_001083962	203753_at,212387_at,212385_at,212382_at,222146_s_at,212386_at,213891_s_at,228837_at	TR(1..8332)CDS(613..2628)	6925	TCF4	Homo sapiens transcription factor 4 (TCF4), transcript variant 1, mRNA.	-1.34371248649453	8.2780797531765	0.000457255695462383	TRUE	kshv-miR-K12-5,kshv-miR-K12-2,kshv-miR-K12-1,kshv-miR-K12-11,kshv-miR-K12-3,kshv-miR-K12-4-3p
NM_031283	221016_s_at	TR(1..2779)CDS(75..1841)	83439	TCF7L1	Homo sapiens transcription factor 7-like 1 (T-cell specific, HMG-box) (TCF7L1), mRNA.	-0.874028822321071	3.03847047746801	2.3212275053805e-06	TRUE	kshv-miR-K12-1
NM_007110	205727_at	TR(1..8595)CDS(42..7925)	7011	TEP1	Homo sapiens telomerase-associated protein 1 (TEP1), mRNA.	-1.03074118832217	3.57282265115132	9.78644165216238e-14	TRUE	kshv-miR-K12-4-3p
NM_001018058	232383_at,206715_at	TR(1..6544)CDS(185..1141)	22797	TFEC	Homo sapiens transcription factor EC (TFEC), transcript variant 2, mRNA.	-0.745763933577569	7.33250290522005	0.00241944369396152	TRUE	kshv-miR-K12-6-3p,kshv-miR-K12-1,kshv-miR-K12-11,kshv-miR-K12-3,kshv-miR-K12-9*
NM_003242	207334_s_at,208944_at	TR(1..4629)CDS(383..2086)	7048	TGFBR2	Homo sapiens transforming growth factor, beta receptor II (70/80kDa) (TGFBR2), transcript variant 2, mRNA.	-0.503284519403167	7.55775806627002	0.00549804301036504	TRUE	kshv-miR-K12-8,kshv-miR-K12-5,kshv-miR-K12-1,kshv-miR-K12-11,kshv-miR-K12-3,kshv-miR-K12-4-3p
NM_004257	205210_at	TR(1..2960)CDS(66..2648)	9392	TGFBRAP1	Homo sapiens transforming growth factor, beta receptor associated protein 1 (TGFBRAP1), mRNA.	-0.849536422693757	4.68657802503097	0.0264494275002642	FALSE	kshv-miR-K12-6-5p
NM_021809	218724_s_at,216262_s_at	TR(1..3406)CDS(174..887)	60436	TGIF2	Homo sapiens TGFB-induced factor homeobox 2 (TGIF2), mRNA.	-0.975291453648015	5.4857654688145	0.0093991602324798	TRUE	kshv-miR-K12-1,kshv-miR-K12-6-5p,kshv-miR-K12-9*,kshv-miR-K12-7,kshv-miR-K12-4-5p
NM_004613	201042_at	TR(1..3937)CDS(101..2164)	7052	TGM2	Homo sapiens transglutaminase 2 (C polypeptide, protein-glutamine-gamma-glutamyltransferase) (TGM2), transcript variant 1, mRNA.	-0.516798400005027	9.71261355592488	0.00270192660332784	TRUE	kshv-miR-K12-3,kshv-miR-K12-6-5p,kshv-miR-K12-9*
NM_003246	201108_s_at,201107_s_at,201109_s_at,201110_s_at	TR(1..5820)CDS(180..3692)	7057	THBS1	Homo sapiens thrombospondin 1 (THBS1), mRNA.	-1.03943659579569	8.5441040841812	0.00147388453310158	TRUE	kshv-miR-K12-3
NM_017736	213025_at	TR(1..4416)CDS(139..1200)	55623	THUMPD1	Homo sapiens THUMP domain containing 1 (THUMPD1), mRNA.	-0.901859605466001	8.43707245637263	7.9182980697571e-06	TRUE	kshv-miR-K12-1,kshv-miR-K12-6-5p,kshv-miR-K12-4-3p,kshv-miR-K12-4-5p
NM_152902	1554351_a_at,1553677_a_at	TR(1..3032)CDS(146..964)	261726	TIPRL	Homo sapiens TIP41, TOR signaling pathway regulator-like (S. cerevisiae) (TIPRL), transcript variant 1, mRNA.	-0.594696256950975	8.12414931220835	0.0183350943167232	TRUE	kshv-miR-K12-3
NM_175610	214168_s_at,202011_at	TR(1..6925)CDS(476..5482)	7082	TJP1	Homo sapiens tight junction protein 1 (zona occludens 1) (TJP1), transcript variant 2, mRNA.	-0.501018611697188	9.26280930896767	0.0129719018707130	TRUE	kshv-miR-K12-2,kshv-miR-K12-3,kshv-miR-K12-4-3p
NM_007005	214688_at,233575_s_at,204872_at,235765_at	TR(1..4749)CDS(829..3150)	7091	TLE4	Homo sapiens transducin-like enhancer of split 4 (E(sp1) homolog, Drosophila) (TLE4), mRNA.	-0.720082077632627	4.65315521682009	0.000505421396110806	TRUE	kshv-miR-K12-2,kshv-miR-K12-11,kshv-miR-K12-6-5p
NM_138786	228489_at	TR(1..1181)CDS(138..743)	116441	TM4SF18	Homo sapiens transmembrane 4 L six family member 18 (TM4SF18), mRNA.	-1.32184676357314	10.8600197996832	3.97148140106913e-07	TRUE	kshv-miR-K12-1
NM_016551	222477_s_at,217974_at	TR(1..2527)CDS(38..1750)	51768	TM7SF3	Homo sapiens transmembrane 7 superfamily member 3 (TM7SF3), mRNA.	-0.491599112380194	10.2293461219456	0.0135428522113545	TRUE	kshv-miR-K12-2,kshv-miR-K12-1
NM_052932	211967_at	TR(1..3605)CDS(422..1048)	114908	TMEM123	Homo sapiens transmembrane protein 123 (TMEM123), mRNA.	-0.766303629626939	11.6265333531121	0.000272519981572383	TRUE	kshv-miR-K12-11,kshv-miR-K12-4-3p,kshv-miR-K12-4-5p
NM_022918	222209_s_at	TR(1..3609)CDS(24..1400)	65084	TMEM135	Homo sapiens transmembrane protein 135 (TMEM135), mRNA.	-0.787805250482494	9.81091579877573	0.00923814015354527	TRUE	kshv-miR-K12-2,kshv-miR-K12-3,kshv-miR-K12-6-5p,kshv-miR-K12-7
NM_152680	238063_at	TR(1..3085)CDS(107..658)	201799	TMEM154	Homo sapiens transmembrane protein 154 (TMEM154), mRNA.	-0.776585188827162	6.27616637116432	0.0336545680802053	TRUE	kshv-miR-K12-3,kshv-miR-K12-6-5p,kshv-miR-K12-9*,kshv-miR-K12-7,kshv-miR-K12-9
NM_024943	220169_at	TR(1..1880)CDS(109..999)	80008	TMEM156	Homo sapiens transmembrane protein 156 (TMEM156), mRNA.	-0.786875193927167	4.36997940395122	0.00165810624162492	TRUE	kshv-miR-K12-8,kshv-miR-K12-1,kshv-miR-K12-9*,kshv-miR-K12-4-5p
NM_020422	213272_s_at	TR(1..1922)CDS(362..847)	57146	TMEM159	Homo sapiens transmembrane protein 159 (TMEM159), mRNA.	-1.70760715794016	4.40428844486509	0.000183901609203748	TRUE	kshv-miR-K12-9*
NM_022484	234726_s_at,218962_s_at	TR(1..3951)CDS(393..2486)	64418	TMEM168	Homo sapiens transmembrane protein 168 (TMEM168), mRNA.	-0.9098866115395	6.35397337650111	0.00792405411434253	TRUE	kshv-miR-K12-1,kshv-miR-K12-4-3p,kshv-miR-K12-4-5p
NM_052913	234994_at	TR(1..5042)CDS(2379..3854)	114801	TMEM200A	Homo sapiens transmembrane protein 200A (TMEM200A), mRNA.	-0.618625181818698	8.48031775115052	0.00373180445332331	TRUE	kshv-miR-K12-4-3p
NM_030938	220990_s_at	TR(1..2197)CDS(274..1494)	81671	TMEM49	Homo sapiens transmembrane protein 49 (TMEM49), mRNA.	-0.650003425906354	11.2090346796945	0.00178000315939363	TRUE	kshv-miR-K12-3
NM_018202	218562_s_at,241364_at	TR(1..3940)CDS(203..2197)	55219	TMEM57	Homo sapiens transmembrane protein 57 (TMEM57), mRNA.	-0.72971691012956	6.81651076207085	0.00327608741335230	TRUE	kshv-miR-K12-1,kshv-miR-K12-11,kshv-miR-K12-4-3p,kshv-miR-K12-9*
NM_016127	200847_s_at	TR(1..1977)CDS(185..1204)	51669	TMEM66	Homo sapiens transmembrane protein 66 (TMEM66), mRNA.	-0.535659371540956	10.9213824320720	5.62837565233703e-06	TRUE	kshv-miR-K12-11,kshv-miR-K12-4-3p
NM_178454	225228_at,225230_at	TR(1..1901)CDS(258..1058)	128338	TMEM77	Homo sapiens transmembrane protein 77 (TMEM77), mRNA.	-0.908169885375501	6.59977229997598	0.000118820960114542	TRUE	kshv-miR-K12-1,kshv-miR-K12-11,kshv-miR-K12-4-3p
NM_014573	212281_s_at,212282_at,212279_at,214283_at	TR(1..2585)CDS(146..676)	27346	TMEM97	Homo sapiens transmembrane protein 97 (TMEM97), mRNA.	-0.545158391911469	8.52590462817449	0.000526511469932534	TRUE	kshv-miR-K12-5,kshv-miR-K12-3,kshv-miR-K12-6-5p,kshv-miR-K12-9*
NM_007114	235566_at,213024_at,227685_at	TR(1..6895)CDS(248..3529)	7110	TMF1	Homo sapiens TATA element modulatory factor 1 (TMF1), mRNA.	-0.74632214629216	7.47032584808191	0.0135202576328917	TRUE	kshv-miR-K12-1,kshv-miR-K12-3,kshv-miR-K12-4-3p,kshv-miR-K12-4-5p
NM_014547	223078_s_at,220800_s_at	TR(1..2130)CDS(220..1278)	29766	TMOD3	Homo sapiens tropomodulin 3 (ubiquitous) (TMOD3), mRNA.	-1.36937036959052	7.48547718972631	0.000854511260929924	TRUE	kshv-miR-K12-1,kshv-miR-K12-3
NM_002160	201645_at	TR(1..7616)CDS(363..6968)	3371	TNC	Homo sapiens tenascin C (TNC), mRNA.	-1.44697807742272	4.68442971362052	0.000114047694704201	TRUE	kshv-miR-K12-6-3p
NM_005118	221085_at	TR(1..2011)CDS(117..872)	9966	TNFSF15	Homo sapiens tumor necrosis factor (ligand) superfamily, member 15 (TNFSF15), mRNA.	-1.98332423042499	7.48923480826736	0.00229065627526126	TRUE	kshv-miR-K12-1,kshv-miR-K12-4-5p
NM_003811	206907_at	TR(1..1680)CDS(39..803)	8744	TNFSF9	Homo sapiens tumor necrosis factor (ligand) superfamily, member 9 (TNFSF9), mRNA.	-1.13862299446708	7.97443652851624	0.0220290164091272	TRUE	kshv-miR-K12-6-5p,kshv-miR-K12-9*
NM_001024843	238468_at,229036_at,1558142_at,213254_at,228998_at,230779_at	TR(1..15976)CDS(303..3392)	23112	TNRC6B	Homo sapiens trinucleotide repeat containing 6B (TNRC6B), transcript variant 2, mRNA.	-0.506408272499547	4.80836178608125	0.0444554150515521	TRUE	kshv-miR-K12-8,kshv-miR-K12-2,kshv-miR-K12-3,kshv-miR-K12-4-3p,kshv-miR-K12-11,kshv-miR-K12-1,kshv-miR-K12-5,kshv-miR-K12-9*,kshv-miR-K12-4-5p,kshv-miR-K12-7
NM_020243	217960_s_at	TR(1..1396)CDS(31..459)	56993	TOMM22	Homo sapiens translocase of outer mitochondrial membrane 22 homolog (yeast) (TOMM22), nuclear gene encoding mitochondrial protein, mRNA.	-1.66587324066907	8.37793758948463	2.3921383226792e-05	TRUE	kshv-miR-K12-5,kshv-miR-K12-3,kshv-miR-K12-6-5p
NM_001068	211987_at	TR(1..5189)CDS(1..4866)	7155	TOP2B	Homo sapiens topoisomerase (DNA) II beta 180kDa (TOP2B), mRNA.	-0.742887658477441	9.64647025478382	3.86209133463707e-06	TRUE	kshv-miR-K12-3
NM_004618	204946_s_at,214300_s_at	TR(1..4116)CDS(230..3235)	7156	TOP3A	Homo sapiens topoisomerase (DNA) III alpha (TOP3A), mRNA.	-0.588074874827035	4.05693868037711	0.000849547157273727	TRUE	kshv-miR-K12-1,kshv-miR-K12-6-5p
NM_007027	202633_at	TR(1..5378)CDS(133..4701)	11073	TOPBP1	Homo sapiens topoisomerase (DNA) II binding protein 1 (TOPBP1), mRNA.	-0.85787898815996	9.00131297797689	0.00150368897182129	TRUE	kshv-miR-K12-3,kshv-miR-K12-9*,kshv-miR-K12-4-5p
NM_015602	212409_s_at,216100_s_at,212408_at	TR(1..3824)CDS(219..1970)	26092	TOR1AIP1	Homo sapiens torsin A interacting protein 1 (TOR1AIP1), mRNA.	-0.788119138482031	7.43630654886132	0.00215278854652974	TRUE	kshv-miR-K12-2,kshv-miR-K12-1,kshv-miR-K12-9*
NM_022371	233851_s_at,218459_at	TR(1..2138)CDS(153..1346)	64222	TOR3A	Homo sapiens torsin family 3, member A (TOR3A), mRNA.	-0.689106961267018	7.10230821371658	0.0203328786031098	TRUE	kshv-miR-K12-3
NM_001126117	201746_at,211300_s_at	TR(1..2331)CDS(279..923)	7157	TP53	Homo sapiens tumor protein p53 (TP53), transcript variant 7, mRNA.	-1.12623713019247	7.04655393669563	0.000382209775339083	TRUE	kshv-miR-K12-2,kshv-miR-K12-9*
NM_003292	215220_s_at,228709_at,1557227_s_at,201731_s_at,201730_s_at	TR(1..9727)CDS(298..7389)	7175	TPR	Homo sapiens translocated promoter region (to activated MET oncogene) (TPR), mRNA.	-1.13266069879352	6.64207859488048	0.0219381774776814	TRUE	kshv-miR-K12-5,kshv-miR-K12-1,kshv-miR-K12-6-5p
NM_003595	204079_at	TR(1..1910)CDS(234..1367)	8459	TPST2	Homo sapiens tyrosylprotein sulfotransferase 2 (TPST2), transcript variant 2, mRNA.	-0.716010940782077	5.9408979018502	0.0127596416124704	TRUE	kshv-miR-K12-6-5p,kshv-miR-K12-9*
NM_013293	204658_at	TR(1..1852)CDS(215..1063)	29896	TRA2A	Homo sapiens transformer-2 alpha (TRA2A), mRNA.	-1.51620191898089	8.54783048670914	1.56930939845118e-05	TRUE	kshv-miR-K12-1,kshv-miR-K12-4-5p
NM_014294	201398_s_at,201399_s_at	TR(1..2805)CDS(171..1295)	23471	TRAM1	Homo sapiens translocation associated membrane protein 1 (TRAM1), mRNA.	-0.52819112739561	10.5102262317948	0.000151275410948373	TRUE	kshv-miR-K12-2,kshv-miR-K12-11
NM_021643	202478_at,202479_s_at	TR(1..4408)CDS(1437..2468)	28951	TRIB2	Homo sapiens tribbles homolog 2 (Drosophila) (TRIB2), mRNA.	-1.08417007780329	3.8231323509666	0.0158845805833513	TRUE	kshv-miR-K12-2,kshv-miR-K12-4-5p
NM_015271	202342_s_at,214248_s_at,202341_s_at,215945_s_at	TR(1..6757)CDS(86..2401)	23321	TRIM2	Homo sapiens tripartite motif-containing 2 (TRIM2), transcript variant 1, mRNA.	-0.536047324537035	2.99421237546615	0.0207483388381093	TRUE	kshv-miR-K12-2,kshv-miR-K12-1,kshv-miR-K12-11,kshv-miR-K12-3,kshv-miR-K12-6-5p,kshv-miR-K12-4-3p
NM_003141	204804_at	TR(1..1946)CDS(114..1541)	6737	TRIM21	Homo sapiens tripartite motif-containing 21 (TRIM21), mRNA.	-1.42315466382191	4.84107437284241	0.00445818519688338	TRUE	kshv-miR-K12-6-3p,kshv-miR-K12-4-5p
NM_033228	204732_s_at,210995_s_at	TR(1..2400)CDS(87..1727)	373	TRIM23	Homo sapiens tripartite motif-containing 23 (TRIM23), transcript variant gamma, mRNA.	-1.4292746881002	4.68608316998159	7.40179181520092e-06	TRUE	kshv-miR-K12-6-3p,kshv-miR-K12-2
NM_032765	1568594_s_at	TR(1..2244)CDS(306..1199)	84851	TRIM52	Homo sapiens tripartite motif-containing 52 (TRIM52), mRNA.	-1.8436139455164	4.29650009259337	2.66728195593034e-05	TRUE	kshv-miR-K12-7
NM_173084	227801_at,235476_at,222170_at	TR(1..3886)CDS(196..1407)	286827	TRIM59	Homo sapiens tripartite motif-containing 59 (TRIM59), mRNA.	-1.02058736413525	4.43923079111312	0.00192799178700828	TRUE	kshv-miR-K12-6-5p,kshv-miR-K12-4-3p,kshv-miR-K12-9*
NM_024917	205238_at,1554279_a_at	TR(1..3325)CDS(772..2286)	79979	TRMT2B	Homo sapiens TRM2 tRNA methyltransferase 2 homolog B (S. cerevisiae) (TRMT2B), mRNA.	-1.56375906698385	4.92686097104291	0.00111093638197288	TRUE	kshv-miR-K12-1,kshv-miR-K12-11,kshv-miR-K12-9*
NM_003304	211602_s_at,205803_s_at,205802_at	TR(1..4077)CDS(137..2416)	7220	TRPC1	Homo sapiens transient receptor potential cation channel, subfamily C, member 1 (TRPC1), mRNA.	-0.628079380640031	4.96391292617710	0.000382376086661447	TRUE	kshv-miR-K12-7
NM_003496	214908_s_at,202642_s_at	TR(1..12596)CDS(210..11702)	8295	TRRAP	Homo sapiens transformation/transcription domain-associated protein (TRRAP), mRNA.	-1.69603894100720	5.45325650607365	5.29207360062127e-05	TRUE	kshv-miR-K12-3
NM_025244	223838_at,220623_s_at	TR(1..3685)CDS(653..2749)	80705	TSGA10	Homo sapiens testis specific, 10 (TSGA10), transcript variant 1, mRNA.	-1.08250109270638	3.02791789049137	2.57258611014596e-05	TRUE	kshv-miR-K12-4-3p,kshv-miR-K12-7
NM_004622	201504_s_at,201515_s_at,201513_at	TR(1..3408)CDS(236..922)	7247	TSN	Homo sapiens translin (TSN), mRNA.	-0.603022507920342	7.25282944789354	0.0183577108624919	TRUE	kshv-miR-K12-2,kshv-miR-K12-1,kshv-miR-K12-6-5p
NM_030927	221002_s_at,223314_at	TR(1..5579)CDS(108..920)	81619	TSPAN14	Homo sapiens tetraspanin 14 (TSPAN14), transcript variant 1, mRNA.	-0.585913361562451	4.0346449397746	0.00789348510712804	TRUE	kshv-miR-K12-3,kshv-miR-K12-9,kshv-miR-K12-6-3p,kshv-miR-K12-11,kshv-miR-K12-1,kshv-miR-K12-5,kshv-miR-K12-6-5p,kshv-miR-K12-9*
NM_012339	218693_at	TR(1..1726)CDS(126..1010)	23555	TSPAN15	Homo sapiens tetraspanin 15 (TSPAN15), mRNA.	-0.971258347347548	4.06267920404131	0.0168018847415082	TRUE	kshv-miR-K12-1
NM_198902	200972_at,200973_s_at	TR(1..1767)CDS(218..904)	10099	TSPAN3	Homo sapiens tetraspanin 3 (TSPAN3), transcript variant 2, mRNA.	-0.850222267729534	10.3040711163926	6.34274806003977e-05	TRUE	kshv-miR-K12-6-5p
NM_006675	205665_at,220968_s_at	TR(1..4338)CDS(148..867)	10867	TSPAN9	Homo sapiens tetraspanin 9 (TSPAN9), mRNA.	-0.597211451123245	5.54600603949014	0.00711417009926777	TRUE	kshv-miR-K12-8,kshv-miR-K12-3,kshv-miR-K12-9*,kshv-miR-K12-4-5p
NM_014639	203049_s_at,1554029_a_at,203048_s_at	TR(1..5167)CDS(271..4965)	9652	TTC37	Homo sapiens tetratricopeptide repeat domain 37 (TTC37), mRNA.	-0.664441166470012	8.2746075715446	0.00689009383644083	TRUE	kshv-miR-K12-9
NM_003318	204822_at	TR(1..2984)CDS(75..2648)	7272	TTK	Homo sapiens TTK protein kinase (TTK), mRNA.	-0.593511770831441	8.77442126605208	0.025955562394103	TRUE	kshv-miR-K12-1,kshv-miR-K12-4-3p
NM_153712	224908_s_at,224896_s_at	TR(1..5181)CDS(180..1313)	150465	TTL	Homo sapiens tubulin tyrosine ligase (TTL), mRNA.	-0.606995038976144	7.30068736662072	0.0428493860361479	TRUE	kshv-miR-K12-1,kshv-miR-K12-6-5p,kshv-miR-K12-9
NM_016261	221326_s_at,231853_at	TR(1..2472)CDS(279..1640)	51174	TUBD1	Homo sapiens tubulin, delta 1 (TUBD1), mRNA.	-0.731241303500392	5.04399457963144	0.0217520677501287	TRUE	kshv-miR-K12-2,kshv-miR-K12-1
NM_030755	208097_s_at,209476_at	TR(1..4119)CDS(126..968)	81542	TXNDC1	Homo sapiens thioredoxin domain containing 1 (TXNDC1), mRNA.	-0.870965781101121	10.7286967463033	0.0066586580921853	TRUE	kshv-miR-K12-2,kshv-miR-K12-4-3p,kshv-miR-K12-9*
NM_019022	225302_at	TR(1..4767)CDS(136..1500)	54495	TXNDC10	Homo sapiens thioredoxin domain containing 10 (TXNDC10), mRNA.	-0.76578109464789	9.76876010839898	0.0144180745176511	TRUE	kshv-miR-K12-1,kshv-miR-K12-11,kshv-miR-K12-3,kshv-miR-K12-4-3p
NM_021156	201580_s_at	TR(1..2368)CDS(134..1183)	56255	TXNDC13	Homo sapiens thioredoxin domain containing 13 (TXNDC13), mRNA.	-0.911488011553115	7.47223470245268	0.0135750907647902	TRUE	kshv-miR-K12-5,kshv-miR-K12-7
NM_006472	201010_s_at,201009_s_at,201008_s_at	TR(1..2953)CDS(342..1517)	10628	TXNIP	Homo sapiens thioredoxin interacting protein (TXNIP), mRNA.	-1.69344106241689	4.925127100113	0.000294008871626223	TRUE	kshv-miR-K12-6-5p
NM_018003	223279_s_at,238868_at	TR(1..6873)CDS(105..4355)	55075	UACA	Homo sapiens uveal autoantigen with coiled-coil domains and ankyrin repeats (UACA), transcript variant 1, mRNA.	-0.852737632322906	7.38053382390928	0.0114107610490753	TRUE	kshv-miR-K12-2,kshv-miR-K12-3,kshv-miR-K12-9,kshv-miR-K12-6-3p,kshv-miR-K12-11,kshv-miR-K12-1,kshv-miR-K12-5,kshv-miR-K12-4-5p
NM_018227	218340_s_at,222600_s_at,222601_at,222602_at	TR(1..6462)CDS(53..3211)	55236	UBA6	Homo sapiens ubiquitin-like modifier activating enzyme 6 (UBA6), mRNA.	-0.775644684860198	8.08343433208089	0.00718373942651409	TRUE	kshv-miR-K12-6-3p,kshv-miR-K12-5,kshv-miR-K12-1,kshv-miR-K12-3,kshv-miR-K12-4-5p,kshv-miR-K12-9
NM_003344	222420_s_at	TR(1..2728)CDS(395..946)	7328	UBE2H	Homo sapiens ubiquitin-conjugating enzyme E2H (UBC8 homolog, yeast) (UBE2H), transcript variant 1, mRNA.	-1.43219160094571	8.75361538187975	0.000250667820460083	TRUE	kshv-miR-K12-5,kshv-miR-K12-2,kshv-miR-K12-6-5p,kshv-miR-K12-4-5p
NM_016021	217823_s_at,217824_at,217825_s_at,217826_s_at,222435_s_at	TR(1..4360)CDS(332..1288)	51465	UBE2J1	Homo sapiens ubiquitin-conjugating enzyme E2, J1 (UBC6 homolog, yeast) (UBE2J1), mRNA.	-1.12556487420620	8.91432747089343	0.00154480463883214	TRUE	kshv-miR-K12-1,kshv-miR-K12-6-5p,kshv-miR-K12-4-3p,kshv-miR-K12-4-5p
NM_003348	212751_at	TR(1..2568)CDS(367..825)	7334	UBE2N	Homo sapiens ubiquitin-conjugating enzyme E2N (UBC13 homolog, yeast) (UBE2N), mRNA.	-0.780454212096143	8.90138774232322	0.00154630172018105	TRUE	kshv-miR-K12-1,kshv-miR-K12-4-3p
NM_014671	201817_at,1554794_a_at	TR(1..5195)CDS(313..3564)	9690	UBE3C	Homo sapiens ubiquitin protein ligase E3C (UBE3C), mRNA.	-0.570373948404826	7.29640895004514	0.0464327577190275	TRUE	kshv-miR-K12-6-5p,kshv-miR-K12-9
NM_006048	210685_s_at,202317_s_at,215533_s_at	TR(1..5556)CDS(714..4235)	10277	UBE4B	Homo sapiens ubiquitination factor E4B (UFD2 homolog, yeast) (UBE4B), transcript variant 2, mRNA.	-1.03075591656073	5.6252261107646	0.00409410133576472	TRUE	kshv-miR-K12-3,kshv-miR-K12-4-3p,kshv-miR-K12-7
NM_016936	209088_s_at,207253_s_at	TR(1..6485)CDS(843..4247)	29855	UBN1	Homo sapiens ubinuclein 1 (UBN1), transcript variant 1, mRNA.	-0.727577704183984	8.14763161162967	0.00257908981443018	TRUE	kshv-miR-K12-4-3p,kshv-miR-K12-9*
NM_014607	212008_at,212007_at,212006_at	TR(1..4018)CDS(312..1838)	23190	UBXN4	Homo sapiens UBX domain protein 4 (UBXN4), mRNA.	-1.20477984398617	9.11525087916617	0.00275932171015506	TRUE	kshv-miR-K12-1,kshv-miR-K12-4-3p,kshv-miR-K12-7
NM_015562	212840_at,217100_s_at	TR(1..4740)CDS(76..1545)	26043	UBXN7	Homo sapiens UBX domain protein 7 (UBXN7), mRNA.	-0.936663345923176	6.28825361720299	0.000418614246640545	TRUE	kshv-miR-K12-1,kshv-miR-K12-9*,kshv-miR-K12-7,kshv-miR-K12-4-5p
NM_015984	219960_s_at	TR(1..1703)CDS(132..1121)	51377	UCHL5	Homo sapiens ubiquitin carboxyl-terminal hydrolase L5 (UCHL5), mRNA.	-0.572121656587078	8.82194814688159	0.00445665614292773	TRUE	kshv-miR-K12-5
NM_175866	227740_at,1552656_s_at,235003_at	TR(1..2900)CDS(137..1396)	127933	UHMK1	Homo sapiens U2AF homology motif (UHM) kinase 1 (UHMK1), mRNA.	-1.14564875687043	6.93572349350385	0.000592433890132585	TRUE	kshv-miR-K12-3
NM_001080533	202365_at	TR(1..4811)CDS(448..1203)	84747	UNC119B	Homo sapiens unc-119 homolog B (C. elegans) (UNC119B), mRNA.	-0.517003737205405	7.20417680673302	0.0023641305850155	TRUE	kshv-miR-K12-1,kshv-miR-K12-3,kshv-miR-K12-6-5p,kshv-miR-K12-9*
NM_003362	202330_s_at	TR(1..2081)CDS(126..1040)	7374	UNG	Homo sapiens uracil-DNA glycosylase (UNG), nuclear gene encoding mitochondrial protein, transcript variant 1, mRNA.	-0.893795021458787	9.59023228524632	0.00645828018420783	TRUE	kshv-miR-K12-6-5p,kshv-miR-K12-9*
NM_015276	200083_at	TR(1..5220)CDS(205..1782)	23326	USP22	Homo sapiens ubiquitin specific peptidase 22 (USP22), mRNA.	-0.782725512483653	8.86800967693436	0.00789546975320363	TRUE	kshv-miR-K12-6-3p,kshv-miR-K12-6-5p,kshv-miR-K12-4-3p,kshv-miR-K12-9*
NM_014709	242647_at,212065_s_at	TR(1..11326)CDS(23..10663)	9736	USP34	Homo sapiens ubiquitin specific peptidase 34 (USP34), mRNA.	-1.12800742369252	5.14816525255603	0.0027441831337962	TRUE	kshv-miR-K12-1
NM_020935	226729_at,232033_at,226730_s_at	TR(1..8032)CDS(414..3353)	57695	USP37	Homo sapiens ubiquitin specific peptidase 37 (USP37), mRNA.	-0.880116529467927	5.29704101271855	0.000364943416109824	TRUE	kshv-miR-K12-6-3p,kshv-miR-K12-11,kshv-miR-K12-3,kshv-miR-K12-6-5p,kshv-miR-K12-4-3p,kshv-miR-K12-4-5p
NM_032557	223289_s_at,223288_at	TR(1..5195)CDS(535..3663)	84640	USP38	Homo sapiens ubiquitin specific peptidase 38 (USP38), mRNA.	-0.579434896155428	8.2847660439825	0.000451686733417978	TRUE	kshv-miR-K12-2,kshv-miR-K12-3,kshv-miR-K12-4-5p
NM_005800	204190_at	TR(1..3905)CDS(433..3711)	10208	USPL1	Homo sapiens ubiquitin specific peptidase like 1 (USPL1), mRNA.	-0.502266678306363	7.08741831027961	0.0233667341163757	TRUE	kshv-miR-K12-3
NM_032175	228050_at,228043_at	TR(1..3655)CDS(224..1780)	84135	UTP15	Homo sapiens UTP15, U3 small nucleolar ribonucleoprotein, homolog (S. cerevisiae) (UTP15), mRNA.	-0.547182974736894	5.16186090881609	0.00258604487971330	TRUE	kshv-miR-K12-1,kshv-miR-K12-4-3p,kshv-miR-K12-9*
NM_007124	225093_at,213022_s_at,213023_at	TR(1..12436)CDS(93..10394)	7402	UTRN	Homo sapiens utrophin (UTRN), mRNA.	-1.18527284319706	7.31397973867593	0.00690347117486289	TRUE	kshv-miR-K12-6-5p,kshv-miR-K12-9*,kshv-miR-K12-7,kshv-miR-K12-4-5p,kshv-miR-K12-9
NM_021140	203992_s_at,203990_s_at,203991_s_at	TR(1..5778)CDS(376..4581)	7403	UTX	Homo sapiens ubiquitously transcribed tetratricopeptide repeat, X chromosome (UTX), mRNA.	-0.864194718974265	5.98266613883311	0.00746139542407665	TRUE	kshv-miR-K12-1,kshv-miR-K12-3,kshv-miR-K12-6-5p
NM_003370	202205_at	TR(1..2298)CDS(343..1485)	7408	VASP	Homo sapiens vasodilator-stimulated phosphoprotein (VASP), mRNA.	-1.15824529432464	7.37312775992305	0.000234133597871098	TRUE	kshv-miR-K12-6-5p
NM_020746	229741_at,231829_at,226495_at,220305_at	TR(1..11760)CDS(170..1792)	57506	VISA	Homo sapiens virus-induced signaling adapter (VISA), nuclear gene encoding mitochondrial protein, mRNA.	-0.538225092949948	6.54251289280306	0.017760389404829	TRUE	kshv-miR-K12-5,kshv-miR-K12-2,kshv-miR-K12-1,kshv-miR-K12-11,kshv-miR-K12-6-5p,kshv-miR-K12-4-3p,kshv-miR-K12-9*,kshv-miR-K12-4-5p
NM_020830	233559_s_at,224800_at	TR(1..4607)CDS(52..1284)	57590	WDFY1	Homo sapiens WD repeat and FYVE domain containing 1 (WDFY1), mRNA.	-0.578738642574635	8.26361297799143	0.000161505650145147	TRUE	kshv-miR-K12-6-3p,kshv-miR-K12-1,kshv-miR-K12-11,kshv-miR-K12-3,kshv-miR-K12-6-5p,kshv-miR-K12-4-3p,kshv-miR-K12-9*,kshv-miR-K12-7
NM_001008396	204728_s_at,216228_s_at	TR(1..4641)CDS(355..3375)	11169	WDHD1	Homo sapiens WD repeat and HMG-box DNA binding protein 1 (WDHD1), transcript variant 2, mRNA.	-1.15290687679371	7.28139963859707	0.0228312278558015	TRUE	kshv-miR-K12-11
NM_015131	214662_at	TR(1..3501)CDS(33..2066)	23160	WDR43	Homo sapiens WD repeat domain 43 (WDR43), mRNA.	-0.960743336626066	8.643559493212	4.60140180099415e-05	TRUE	kshv-miR-K12-6-5p
NM_014969	203855_at	TR(1..4256)CDS(262..3024)	22911	WDR47	Homo sapiens WD repeat domain 47 (WDR47), mRNA.	-0.673792012736955	7.95830567591889	0.0453668245751367	TRUE	kshv-miR-K12-2,kshv-miR-K12-6-5p,kshv-miR-K12-4-5p
NM_172240	226283_at	TR(1..2984)CDS(106..1542)	282809	WDR51B	Homo sapiens WD repeat domain 51B (WDR51B), mRNA.	-0.514802962361804	6.71033234156728	0.00104557327248246	TRUE	kshv-miR-K12-3,kshv-miR-K12-4-3p
NM_024908	205519_at	TR(1..2524)CDS(24..1904)	79968	WDR76	Homo sapiens WD repeat domain 76 (WDR76), mRNA.	-1.76124735728202	4.81543049633914	0.00462303990197652	TRUE	kshv-miR-K12-9*,kshv-miR-K12-4-5p
NM_003390	212533_at,215711_s_at	TR(1..4232)CDS(1142..3082)	7465	WEE1	Homo sapiens WEE1 homolog (S. pombe) (WEE1), mRNA.	-0.83777707362129	7.4156704176173	0.0060987785587978	TRUE	kshv-miR-K12-1,kshv-miR-K12-11
NM_133335	209053_s_at,223472_at,209054_s_at,222778_s_at,222777_s_at,209052_s_at	TR(1..7543)CDS(140..4237)	7468	WHSC1	Homo sapiens Wolf-Hirschhorn syndrome candidate 1 (WHSC1), transcript variant 3, mRNA.	-0.776302624832046	6.87651259596284	0.0240801945970334	TRUE	kshv-miR-K12-5,kshv-miR-K12-1,kshv-miR-K12-3,kshv-miR-K12-6-5p,kshv-miR-K12-9
NM_032345	224465_s_at	TR(1..1240)CDS(153..767)	84305	WIBG	Homo sapiens within bgcn homolog (Drosophila) (WIBG), mRNA.	-0.75435940655273	6.27494974570171	0.000874819289590187	TRUE	kshv-miR-K12-6-5p
NM_004627	202749_at	TR(1..1573)CDS(99..623)	7485	WRB	Homo sapiens tryptophan rich basic protein (WRB), mRNA.	-0.664126180115863	9.17935576820525	0.00714166618145421	TRUE	kshv-miR-K12-3
NM_152381	228794_at	TR(1..12618)CDS(19..10668)	129446	XIRP2	Homo sapiens xin actin-binding repeat containing 2 (XIRP2), transcript variant 1, mRNA.	-0.630088165317358	2.93897169665979	0.000109193255104153	TRUE	kshv-miR-K12-2,kshv-miR-K12-1,kshv-miR-K12-3,kshv-miR-K12-6-5p,kshv-miR-K12-4-5p
NM_022459	222649_at,218479_s_at	TR(1..9902)CDS(37..3492)	64328	XPO4	Homo sapiens exportin 4 (XPO4), mRNA.	-1.12338062678978	6.097392099244	0.00193918833300473	TRUE	kshv-miR-K12-5,kshv-miR-K12-1,kshv-miR-K12-11,kshv-miR-K12-9*,kshv-miR-K12-4-5p
NM_001100162	208459_s_at,212166_at	TR(1..4836)CDS(56..3322)	23039	XPO7	Homo sapiens exportin 7 (XPO7), transcript variant 3, mRNA.	-1.01827324209554	7.96919299597585	0.0112469437454867	TRUE	kshv-miR-K12-2,kshv-miR-K12-6-5p,kshv-miR-K12-4-3p
NM_005433	202932_at	TR(1..4685)CDS(222..1853)	7525	YES1	Homo sapiens v-yes-1 Yamaguchi sarcoma viral oncogene homolog 1 (YES1), mRNA.	-0.670322288747998	9.12035230657838	1.16226095989682e-06	TRUE	kshv-miR-K12-11,kshv-miR-K12-3,kshv-miR-K12-9*
NM_001005404	229060_at,227020_at	TR(1..5242)CDS(329..688)	388403	YPEL2	Homo sapiens yippee-like 2 (Drosophila) (YPEL2), mRNA.	-0.508217216493844	4.5475814059374	0.045144918739303	TRUE	kshv-miR-K12-5,kshv-miR-K12-2,kshv-miR-K12-1,kshv-miR-K12-3,kshv-miR-K12-6-5p,kshv-miR-K12-7,kshv-miR-K12-9
NM_022828	213077_at,1568680_s_at,205835_s_at,205836_s_at	TR(1..6301)CDS(184..4476)	64848	YTHDC2	Homo sapiens YTH domain containing 2 (YTHDC2), mRNA.	-1.13089771019861	5.97131772845348	9.68813006003557e-05	TRUE	kshv-miR-K12-1,kshv-miR-K12-11
NM_003405	201020_at	TR(1..1807)CDS(242..982)	7533	YWHAH	Homo sapiens tyrosine 3-monooxygenase/tryptophan 5-monooxygenase activation protein, eta polypeptide (YWHAH), mRNA.	-1.05905163935396	8.81867129906963	0.00459598530908579	TRUE	kshv-miR-K12-2
NM_014950	213376_at	TR(1..4119)CDS(392..2326)	22890	ZBTB1	Homo sapiens zinc finger and BTB domain containing 1 (ZBTB1), transcript variant 2, mRNA.	-0.666611593416133	8.56843731019229	0.000135293794558980	TRUE	kshv-miR-K12-1,kshv-miR-K12-3,kshv-miR-K12-6-5p,kshv-miR-K12-4-3p,kshv-miR-K12-9
NM_001105539	219312_s_at	TR(1..6061)CDS(599..3214)	65986	ZBTB10	Homo sapiens zinc finger and BTB domain containing 10 (ZBTB10), transcript variant 1, mRNA.	-1.29004548732484	4.4353015769633	0.00964291922462232	TRUE	kshv-miR-K12-2,kshv-miR-K12-1,kshv-miR-K12-4-3p
NM_001099270	227111_at	TR(1..6577)CDS(98..1600)	403341	ZBTB34	Homo sapiens zinc finger and BTB domain containing 34 (ZBTB34), mRNA.	-0.611594936314172	5.72462147735694	9.19677217289337e-05	TRUE	kshv-miR-K12-8,kshv-miR-K12-6-3p,kshv-miR-K12-2,kshv-miR-K12-1,kshv-miR-K12-3
NM_006626	206098_at	TR(1..4128)CDS(90..1364)	10773	ZBTB6	Homo sapiens zinc finger and BTB domain containing 6 (ZBTB6), mRNA.	-1.12369155706089	4.31770402735106	6.08864981792946e-05	TRUE	kshv-miR-K12-6-3p,kshv-miR-K12-4-3p
NM_033390	231899_at	TR(1..8807)CDS(52..2703)	85463	ZC3H12C	Homo sapiens zinc finger CCCH-type containing 12C (ZC3H12C), mRNA.	-1.67151200544876	8.38201678601031	1.14262871927105e-07	TRUE	kshv-miR-K12-6-3p,kshv-miR-K12-2,kshv-miR-K12-1,kshv-miR-K12-3,kshv-miR-K12-6-5p,kshv-miR-K12-4-3p,kshv-miR-K12-9
NM_014153	218348_s_at,226897_s_at	TR(1..3859)CDS(199..3114)	29066	ZC3H7A	Homo sapiens zinc finger CCCH-type containing 7A (ZC3H7A), mRNA.	-0.923622013835194	7.9506662016155	0.0467651001628069	TRUE	kshv-miR-K12-1,kshv-miR-K12-7,kshv-miR-K12-4-5p
NM_018684	225784_s_at	TR(1..2189)CDS(89..763)	55906	ZC4H2	Homo sapiens zinc finger, C4H2 domain containing (ZC4H2), mRNA.	-1.22122116249386	4.99638305585692	0.0158179163422851	TRUE	kshv-miR-K12-3,kshv-miR-K12-6-5p,kshv-miR-K12-7
NM_015336	212982_at,217486_s_at	TR(1..4771)CDS(164..2062)	23390	ZDHHC17	Homo sapiens zinc finger, DHHC-type containing 17 (ZDHHC17), mRNA.	-1.60493721998320	6.29326331263697	4.15441130219165e-06	TRUE	kshv-miR-K12-6-3p,kshv-miR-K12-1,kshv-miR-K12-3,kshv-miR-K12-4-3p,kshv-miR-K12-7,kshv-miR-K12-4-5p
NM_022494	218249_at	TR(1..2187)CDS(425..1666)	64429	ZDHHC6	Homo sapiens zinc finger, DHHC-type containing 6 (ZDHHC6), mRNA.	-0.820063730337456	8.52716573975366	0.041625551511586	TRUE	kshv-miR-K12-4-3p
NM_030751	212758_s_at,210875_s_at,212764_at	TR(1..5387)CDS(64..3438)	6935	ZEB1	Homo sapiens zinc finger E-box binding homeobox 1 (ZEB1), transcript variant 2, mRNA.	-1.42142519760415	7.40075725004623	0.00159579886495403	TRUE	kshv-miR-K12-3
NM_013380	222237_s_at	TR(1..3688)CDS(83..2806)	7771	ZFP112	Homo sapiens zinc finger protein 112 homolog (mouse) (ZFP112), transcript variant 2, mRNA.	-0.720358605349749	5.30265991607218	0.00798030341754676	TRUE	kshv-miR-K12-11,kshv-miR-K12-6-5p,kshv-miR-K12-4-5p
NM_006887	201367_s_at,201369_s_at,201368_at	TR(1..3702)CDS(292..1776)	678	ZFP36L2	Homo sapiens zinc finger protein 36, C3H type-like 2 (ZFP36L2), mRNA.	-0.720914323056483	8.3840188243176	0.0159169865784574	TRUE	kshv-miR-K12-5,kshv-miR-K12-1,kshv-miR-K12-11,kshv-miR-K12-6-5p
NM_053023	224636_at,224631_at	TR(1..5233)CDS(169..1881)	80829	ZFP91	Homo sapiens zinc finger protein 91 homolog (mouse) (ZFP91), mRNA.	-0.87698226620544	8.26529548331715	3.93147035700432e-05	TRUE	kshv-miR-K12-2,kshv-miR-K12-1,kshv-miR-K12-4-3p,kshv-miR-K12-9*,kshv-miR-K12-7
NM_016107	33148_at,201856_s_at,213286_at	TR(1..4746)CDS(81..3305)	51663	ZFR	Homo sapiens zinc finger RNA binding protein (ZFR), mRNA.	-1.11722840055614	6.15014126547317	5.62690314072258e-05	TRUE	kshv-miR-K12-2,kshv-miR-K12-1,kshv-miR-K12-4-3p
NM_003410	217176_s_at	TR(1..5811)CDS(259..2676)	7543	ZFX	Homo sapiens zinc finger protein, X-linked (ZFX), mRNA.	-0.666476750694589	2.85318146450657	0.00119572532650800	TRUE	kshv-miR-K12-9*
NM_001105251	203651_at	TR(1..7224)CDS(303..4922)	9765	ZFYVE16	Homo sapiens zinc finger, FYVE domain containing 16 (ZFYVE16), transcript variant 2, mRNA.	-0.731608501442438	7.55589390356146	0.0239424129109884	TRUE	kshv-miR-K12-3,kshv-miR-K12-4-3p
NM_007324	208446_s_at	TR(1..4753)CDS(173..4273)	9372	ZFYVE9	Homo sapiens zinc finger, FYVE domain containing 9 (ZFYVE9), transcript variant 1, mRNA.	-0.718441210724122	2.94119980976391	0.0330696106239497	TRUE	kshv-miR-K12-6-3p,kshv-miR-K12-9
NM_007222	223213_s_at,223214_s_at	TR(1..4937)CDS(431..3052)	11244	ZHX1	Homo sapiens zinc fingers and homeoboxes 1 (ZHX1), transcript variant 2, mRNA.	-1.30676614451599	7.52822642123326	0.000357953846770295	TRUE	kshv-miR-K12-2,kshv-miR-K12-3,kshv-miR-K12-9
NM_014569	203731_s_at,203730_s_at	TR(1..4361)CDS(252..2771)	23660	ZKSCAN5	Homo sapiens zinc finger with KRAB and SCAN domains 5 (ZKSCAN5), transcript variant 1, mRNA.	-0.500129959643297	5.31422343184991	0.0343720814426797	TRUE	kshv-miR-K12-6-3p,kshv-miR-K12-11,kshv-miR-K12-6-5p,kshv-miR-K12-9*,kshv-miR-K12-4-5p
NM_024772	220206_at	TR(1..4172)CDS(149..3577)	79830	ZMYM1	Homo sapiens zinc finger, MYM-type 1 (ZMYM1), mRNA.	-0.83143290600736	7.20100060791023	0.0170564026467724	TRUE	kshv-miR-K12-6-5p
NM_003453	210281_s_at,202778_s_at	TR(1..5217)CDS(299..4432)	7750	ZMYM2	Homo sapiens zinc finger, MYM-type 2 (ZMYM2), mRNA.	-1.01432556855570	5.89977114771293	0.00288870327032766	TRUE	kshv-miR-K12-1,kshv-miR-K12-11,kshv-miR-K12-3,kshv-miR-K12-4-3p
NM_007167	219925_at,227595_at,227594_at	TR(1..5159)CDS(229..4206)	9204	ZMYM6	Homo sapiens zinc finger, MYM-type 6 (ZMYM6), mRNA.	-0.687451272161698	4.69077931334808	0.0143984740075952	TRUE	kshv-miR-K12-9*
NM_003431	206928_at	TR(1..1674)CDS(140..1009)	7678	ZNF124	Homo sapiens zinc finger protein 124 (ZNF124), mRNA.	-1.64419678680893	5.77058159059997	3.21285349843745e-08	TRUE	kshv-miR-K12-2,kshv-miR-K12-1,kshv-miR-K12-3
NM_007145	200050_at,1554433_a_at	TR(1..3880)CDS(1524..2402)	7705	ZNF146	Homo sapiens zinc finger protein 146 (ZNF146), transcript variant 1, mRNA.	-0.960781483755594	9.37608554903657	0.0278067691654741	TRUE	kshv-miR-K12-1,kshv-miR-K12-7
NM_003457	200828_s_at	TR(1..2285)CDS(149..1585)	7756	ZNF207	Homo sapiens zinc finger protein 207 (ZNF207), transcript variant 1, mRNA.	-0.505732276960152	11.2493216302909	0.0196667911307710	TRUE	kshv-miR-K12-3
NM_013250	220214_at	TR(1..3658)CDS(589..2142)	7762	ZNF215	Homo sapiens zinc finger protein 215 (ZNF215), mRNA.	-0.791074020366485	5.77871923583658	0.0284929962811461	TRUE	kshv-miR-K12-1,kshv-miR-K12-4-3p
NM_006526	203739_at	TR(1..5653)CDS(272..3418)	7764	ZNF217	Homo sapiens zinc finger protein 217 (ZNF217), mRNA.	-1.04552851380966	7.7199293063032	0.00089824185624372	TRUE	kshv-miR-K12-2,kshv-miR-K12-1,kshv-miR-K12-6-5p,kshv-miR-K12-9*
NM_004234	220350_at	TR(1..3190)CDS(104..2320)	9310	ZNF235	Homo sapiens zinc finger protein 235 (ZNF235), mRNA.	-0.637583542189342	3.4078153941903	2.99812914715499e-07	FALSE	kshv-miR-K12-2,kshv-miR-K12-1,kshv-miR-K12-3
NM_006352	212774_at,207164_s_at	TR(1..4244)CDS(523..2091)	10472	ZNF238	Homo sapiens zinc finger protein 238 (ZNF238), transcript variant 2, mRNA.	-0.533062428464279	5.63646705179865	0.0133986954706851	TRUE	kshv-miR-K12-1,kshv-miR-K12-11,kshv-miR-K12-3,kshv-miR-K12-7,kshv-miR-K12-4-5p
NM_003414	219540_at	TR(1..3281)CDS(210..2441)	10308	ZNF267	Homo sapiens zinc finger protein 267 (ZNF267), transcript variant 498723, mRNA.	-0.727907380831459	7.47455289644248	0.000232595276393321	TRUE	kshv-miR-K12-2,kshv-miR-K12-3
NM_015565	233819_s_at,215596_s_at	TR(1..7703)CDS(99..5399)	26046	ZNF294	Homo sapiens zinc finger protein 294 (ZNF294), mRNA.	-1.27839459427935	8.04086937857214	0.000756728976721124	TRUE	kshv-miR-K12-1,kshv-miR-K12-11,kshv-miR-K12-3,kshv-miR-K12-4-3p,kshv-miR-K12-4-5p
NM_052860	228144_at	TR(1..3104)CDS(268..2082)	91975	ZNF300	Homo sapiens zinc finger protein 300 (ZNF300), mRNA.	-1.50925494135462	5.10936558322807	0.00889374039175216	TRUE	kshv-miR-K12-11
NM_145909	222016_s_at	TR(1..3176)CDS(527..1747)	64288	ZNF323	Homo sapiens zinc finger protein 323 (ZNF323), transcript variant 2, mRNA.	-0.604909932188608	2.96333483628328	0.0231938278910665	TRUE	kshv-miR-K12-1,kshv-miR-K12-11,kshv-miR-K12-3,kshv-miR-K12-6-5p
NM_182975	234093_at,241720_at,227680_at	TR(1..1560)CDS(140..352)	284695	ZNF326	Homo sapiens zinc finger protein 326 (ZNF326), transcript variant 3, mRNA.	-0.861132234672082	5.15710308546634	0.000266273262558136	TRUE	kshv-miR-K12-1,kshv-miR-K12-6-5p,kshv-miR-K12-4-5p
NM_012279	236267_at,222884_at	TR(1..3089)CDS(44..928)	23567	ZNF346	Homo sapiens zinc finger protein 346 (ZNF346), mRNA.	-0.558673272286567	5.20349575766374	0.00416447022878244	TRUE	kshv-miR-K12-6-3p,kshv-miR-K12-2,kshv-miR-K12-9*
NM_152493	226820_at	TR(1..3158)CDS(171..1433)	149076	ZNF362	Homo sapiens zinc finger protein 362 (ZNF362), mRNA.	-0.879829169817947	5.42744857132602	0.0491420226156116	FALSE	kshv-miR-K12-1
NM_030634	226113_at,226114_at	TR(1..4315)CDS(382..1794)	80818	ZNF436	Homo sapiens zinc finger protein 436 (ZNF436), transcript variant 2, mRNA.	-0.499412072739382	4.37083051103699	0.00199303528062940	TRUE	kshv-miR-K12-6-3p,kshv-miR-K12-2,kshv-miR-K12-1,kshv-miR-K12-3,kshv-miR-K12-6-5p,kshv-miR-K12-4-3p,kshv-miR-K12-9*,kshv-miR-K12-7,kshv-miR-K12-4-5p
NM_153034	229901_at	TR(1..3513)CDS(163..1185)	118738	ZNF488	Homo sapiens zinc finger protein 488 (ZNF488), mRNA.	-1.20211253750537	4.36452003833654	0.027544591495279	FALSE	kshv-miR-K12-6-3p,kshv-miR-K12-6-5p,kshv-miR-K12-9*
NM_014803	204291_at	TR(1..8296)CDS(858..5309)	9849	ZNF518A	Homo sapiens zinc finger protein 518A (ZNF518A), mRNA.	-1.11623827316609	7.3834464162632	0.000166854489670569	TRUE	kshv-miR-K12-2,kshv-miR-K12-1,kshv-miR-K12-4-3p
NM_053042	226909_at	TR(1..6936)CDS(488..3712)	85460	ZNF518B	Homo sapiens zinc finger protein 518B (ZNF518B), mRNA.	-0.502270645809218	6.72896643821097	0.00531271568161692	TRUE	kshv-miR-K12-2,kshv-miR-K12-1,kshv-miR-K12-11,kshv-miR-K12-4-3p,kshv-miR-K12-9*,kshv-miR-K12-7,kshv-miR-K12-4-5p
NM_015461	226676_at,226677_at	TR(1..4869)CDS(150..4085)	25925	ZNF521	Homo sapiens zinc finger protein 521 (ZNF521), mRNA.	-0.853372557712792	7.16854715183576	0.00933231362811146	TRUE	kshv-miR-K12-3
NM_032453	244861_at	TR(1..5126)CDS(112..1941)	84503	ZNF527	Homo sapiens zinc finger protein 527 (ZNF527), mRNA.	-1.42370393028816	4.20244920988042	0.00254890000108517	FALSE	kshv-miR-K12-8,kshv-miR-K12-6-3p,kshv-miR-K12-2,kshv-miR-K12-1,kshv-miR-K12-9*,kshv-miR-K12-4-5p
NM_138347	211721_s_at	TR(1..3711)CDS(224..2188)	90233	ZNF551	Homo sapiens zinc finger protein 551 (ZNF551), mRNA.	-0.931300184642977	6.6542563805183	0.0434485755378424	TRUE	kshv-miR-K12-8,kshv-miR-K12-3,kshv-miR-K12-4-3p
NM_032828	1558251_a_at	TR(1..6845)CDS(139..1866)	84914	ZNF587	Homo sapiens zinc finger protein 587 (ZNF587), mRNA.	-0.783449966959684	3.07906822469488	0.0199232126528658	TRUE	kshv-miR-K12-2,kshv-miR-K12-3,kshv-miR-K12-4-3p,kshv-miR-K12-9,kshv-miR-K12-6-3p,kshv-miR-K12-1,kshv-miR-K12-6-5p,kshv-miR-K12-4-5p,kshv-miR-K12-9*
NM_032186	222580_at,1553725_s_at	TR(1..2004)CDS(165..482)	84146	ZNF644	Homo sapiens zinc finger protein 644 (ZNF644), transcript variant 3, mRNA.	-1.39815910572939	6.76514612098892	8.05013574308043e-05	TRUE	kshv-miR-K12-11,kshv-miR-K12-4-3p
NM_014897	205594_at	TR(1..5428)CDS(320..2140)	22834	ZNF652	Homo sapiens zinc finger protein 652 (ZNF652), mRNA.	-1.29008419285468	4.91996404402337	0.00047908042631812	TRUE	kshv-miR-K12-2,kshv-miR-K12-11,kshv-miR-K12-3,kshv-miR-K12-9*,kshv-miR-K12-9
NM_182515	232338_at	TR(1..8790)CDS(361..2028)	148206	ZNF714	Homo sapiens zinc finger protein 714 (ZNF714), mRNA.	-1.92200832066001	4.62136428623627	0.0107672258974557	TRUE	kshv-miR-K12-5,kshv-miR-K12-2,kshv-miR-K12-1,kshv-miR-K12-11,kshv-miR-K12-3,kshv-miR-K12-4-3p,kshv-miR-K12-9*,kshv-miR-K12-7
NM_133474	228029_at	TR(1..5170)CDS(692..3463)	170960	ZNF721	Homo sapiens zinc finger protein 721 (ZNF721), mRNA.	-1.65105053376757	7.35843767258792	0.000153219991072526	TRUE	kshv-miR-K12-2,kshv-miR-K12-1,kshv-miR-K12-11,kshv-miR-K12-3
NM_001004304	1558277_at,227331_at	TR(1..4256)CDS(395..976)	283337	ZNF740	Homo sapiens zinc finger protein 740 (ZNF740), mRNA.	-0.785681607251834	4.57620469155755	0.00066368988546716	TRUE	kshv-miR-K12-1,kshv-miR-K12-6-5p,kshv-miR-K12-9
NM_024646	227918_s_at,225338_at,225350_s_at	TR(1..8143)CDS(196..2430)	79699	ZYG11B	Homo sapiens zyg-11 homolog B (C. elegans) (ZYG11B), mRNA.	-0.83717163786609	7.19287170951657	0.000952387788039095	TRUE	kshv-miR-K12-6-3p,kshv-miR-K12-2,kshv-miR-K12-1,kshv-miR-K12-3,kshv-miR-K12-4-3p,kshv-miR-K12-9*
